# Supplementary material for: Associations of four biological age markers with child development: A multi-omic analysis in the European HELIX cohort
Source: eLife. 2023 Jun 6;12:e85104. doi: 10.7554/eLife.85104 (PMC10338035; doi:10.7554/eLife.85104)
Supplement: Figure 3—source data 1. [file elife-85104-fig3-data1.csv]

TL	skinHorvath	mRNAage	predage.unadj	h_cohort	hs_age_years
0.96	6.4	NA	7.59	BIB	7.44
1.11	5.4	7.17	7.42	BIB	7.05
1.14	4.29	6.74	6.29	BIB	6.78
1.16	7	7	6.6	BIB	6.9
1.19	6.97	NA	6.12	BIB	6.75
0.86	5.82	6.95	6.82	BIB	6.85
1.04	5.8	7.18	6.44	BIB	7.07
1	4.51	NA	NA	BIB	6.78
0.85	5.99	NA	6.99	BIB	6.97
1	5.35	NA	7.17	BIB	6.86
0.99	5.78	6.92	8.09	BIB	6.94
1.02	5.22	7.27	5.98	BIB	7.33
1.11	4.82	6.8	6.87	BIB	6.84
1.03	5.11	NA	5.62	BIB	6.88
0.85	6.04	7.3	5.71	BIB	7.15
1.07	6.53	6.64	4.75	BIB	6.75
1.03	5.15	NA	6.87	BIB	6.83
1.03	5.86	6.99	NA	BIB	6.98
1.02	6.88	6.85	5.83	BIB	6.73
0.83	7.32	6.93	7.19	BIB	6.87
0.82	5.71	6.91	6.85	BIB	6.81
1.2	5.04	6.91	6.67	BIB	6.87
0.82	5.61	6.77	6.51	BIB	6.72
0.97	5.46	7.08	5.88	BIB	7.02
1.35	4.85	6.64	NA	BIB	6.78
0.99	5.07	7	7.45	BIB	6.87
0.92	5.21	6.74	7.69	BIB	6.75
0.97	7.31	6.9	NA	BIB	7.03
0.83	5.53	6.85	NA	BIB	6.77
1.23	4.91	6.97	NA	BIB	6.91
0.93	4.86	NA	7.26	BIB	7.04
1.48	6.14	NA	6.53	BIB	6.72
1.05	5.51	6.91	6.47	BIB	6.93
1.16	4.94	6.87	9.01	BIB	6.9
1.11	6.16	6.41	7.03	BIB	6.42
1.43	6.04	7.13	7	BIB	6.83
0.8	4.54	6.77	6.98	BIB	6.75
1.16	5.6	NA	6.53	BIB	6.7
1.32	4.91	6.73	7.17	BIB	6.78
0.72	5.45	6.97	6.07	BIB	6.96
1.25	8.16	7.21	7.9	BIB	6.88
0.85	5.52	6.6	7.12	BIB	6.72
1.2	5.06	6.9	6.49	BIB	6.99
0.87	4.71	7.1	6.72	BIB	6.77
1.19	4.49	NA	7.7	BIB	6.78
1.07	4.82	6.83	6.16	BIB	6.93
0.85	5.27	7.06	6.33	BIB	7.09
1	6.22	NA	NA	BIB	7.04
1.06	5.82	6.78	6.56	BIB	6.81
1.17	5.66	6.84	6.49	BIB	6.9
1.02	5.51	6.73	7.81	BIB	6.72
0.73	4.65	NA	6.25	BIB	6.91
0.86	5.7	7.19	6.75	BIB	7
1.02	5.03	6.82	7.06	BIB	6.68
0.84	6.54	6.93	7.64	BIB	6.89
0.71	6.08	6.86	6.29	BIB	6.87
0.74	6.18	6.94	6.56	BIB	6.88
0.85	5.51	7.05	6.79	BIB	7.01
0.73	4.52	6.94	7.23	BIB	6.87
1.08	5.03	6.85	7.66	BIB	6.8
1.04	5.22	NA	7.25	BIB	6.85
0.86	5.59	6.72	NA	BIB	6.72
0.81	6.37	6.75	8.05	BIB	6.74
1.02	5.67	NA	7.69	BIB	6.7
0.94	5.59	6.86	7.14	BIB	6.82
1.04	6.99	6.82	5.42	BIB	6.76
NA	3.96	6.85	6.61	BIB	6.78
1.26	4.8	6.63	6	BIB	6.7
1.03	4.72	6.88	6.97	BIB	6.66
0.81	5.94	6.77	6.6	BIB	6.8
0.86	5.42	6.92	7.55	BIB	6.78
1.4	6.69	6.98	6.84	BIB	6.82
NA	4.5	6.83	5.79	BIB	6.69
0.94	5.89	6.77	7.66	BIB	6.97
0.76	5.99	7.32	6.38	BIB	7.09
1.18	5.1	6.69	7.87	BIB	6.7
0.97	4.74	6.54	5.15	BIB	6.69
1.35	6.21	6.95	7.54	BIB	6.81
0.92	5.35	6.74	NA	BIB	6.69
0.74	4.57	6.79	7.62	BIB	6.7
0.84	4.38	6.98	5.99	BIB	6.99
0.83	5.74	6.73	5.79	BIB	6.81
0.94	5	6.79	6.84	BIB	6.66
0.98	5.12	NA	6.73	BIB	6.75
1.01	5.56	6.79	6.59	BIB	6.71
1.24	5.67	6.67	6.39	BIB	6.7
0.96	5.08	NA	NA	BIB	6.67
1	6.29	6.83	6.99	BIB	6.81
1.17	5.74	6.7	6.48	BIB	6.62
0.76	6.08	6.55	7.44	BIB	6.64
0.97	3.88	6.72	7.4	BIB	6.68
0.86	4.86	6.93	6.83	BIB	6.92
0.77	4.98	6.46	6.01	BIB	6.51
0.84	6.18	6.68	6.53	BIB	6.61
0.78	4.92	6.58	6.47	BIB	6.6
0.88	4.75	6.69	5.93	BIB	6.71
0.92	5.37	6.48	6.81	BIB	6.47
1.11	4.97	6.6	5.96	BIB	6.51
1.4	4.37	NA	6.73	BIB	6.55
0.96	4.75	NA	7.64	BIB	6.49
0.76	5.22	6.47	6.77	BIB	6.55
0.96	5.14	6.67	6.96	BIB	6.46
1.32	6.05	NA	6.87	BIB	6.48
1.21	4.89	6.58	7.83	BIB	6.57
0.89	4.17	NA	6.6	BIB	6.41
0.77	4.59	6.55	6.11	BIB	6.53
0.93	6.72	6.6	6.45	BIB	6.56
0.93	4.95	NA	6.64	BIB	6.47
1.01	4.92	6.6	6.24	BIB	6.49
1.21	4.85	6.63	7.67	BIB	6.66
0.79	5.17	6.61	5.22	BIB	6.58
1	4.59	6.45	6.53	BIB	6.53
0.95	5.51	6.57	6.31	BIB	6.55
0.66	6.15	6.33	6.75	BIB	6.45
1.22	4.27	6.51	6.7	BIB	6.45
0.98	6.29	6.71	7.38	BIB	6.67
1.03	6.32	6.52	7.6	BIB	6.48
1.11	6.98	6.61	8.36	BIB	6.54
1.06	4.45	6.59	8.16	BIB	6.47
1.01	5.45	6.47	8.37	BIB	6.48
1.46	4.71	6.58	6.83	BIB	6.38
1.43	5.78	6.38	6.36	BIB	6.46
1.06	5.11	NA	6.36	BIB	6.65
1.02	5.78	6.35	6.73	BIB	6.43
0.79	4.32	6.7	7.76	BIB	6.63
0.82	3.88	6.58	6.78	BIB	6.55
0.9	6.76	6.57	6.92	BIB	6.67
1.05	5.05	NA	7.39	BIB	6.52
1.16	3.85	NA	5.92	BIB	6.43
0.91	4.05	6.57	7.1	BIB	6.37
1.14	5.21	6.6	6.86	BIB	6.52
0.89	4.27	6.43	6.3	BIB	6.37
1.09	4.42	NA	7.65	BIB	6.45
1.14	5.11	6.56	6.21	BIB	6.45
1.02	4.75	6.67	7.46	BIB	6.66
0.98	5.04	NA	7.11	BIB	6.49
1.01	6.02	6.54	6.9	BIB	6.55
1.35	5.06	6.46	5.18	BIB	6.42
1.03	5.01	6.46	6.34	BIB	6.38
0.9	4.78	6.45	5.9	BIB	6.43
0.97	6.16	6.62	7.17	BIB	6.57
0.87	5.33	6.39	8.02	BIB	6.47
0.97	4.67	NA	6.8	BIB	6.32
1.03	4.33	6.32	7.04	BIB	6.39
0.68	5.26	6.57	7.13	BIB	6.46
0.96	4.75	6.39	7.16	BIB	6.38
1.09	5.84	6.31	6.47	BIB	6.39
1.44	4.31	6.3	5.27	BIB	6.38
0.77	5.84	6.76	6.43	BIB	6.57
1.2	5.04	NA	5.76	BIB	6.34
0.91	4.73	6.65	6.42	BIB	6.35
1.04	4.52	6.49	6.78	BIB	6.51
0.95	5.1	NA	7.53	BIB	6.39
1.17	5.81	NA	7.52	BIB	6.45
1	4.94	6.55	7.06	BIB	6.58
1.07	4.38	6.5	6.62	BIB	6.7
0.98	4.67	6.39	6.99	BIB	6.47
0.96	3.93	6.24	6.63	BIB	6.2
1.14	4.8	6.63	7.58	BIB	6.58
1.01	5.1	6.66	7.05	BIB	6.66
1.09	5.04	6.51	7.5	BIB	6.5
0.87	4.44	6.45	6.68	BIB	6.61
0.99	4.78	6.66	6.95	BIB	6.39
1	5.18	6.61	7.2	BIB	6.61
0.88	4.71	6.52	7.46	BIB	6.53
0.89	5.91	6.46	6.58	BIB	6.41
1.21	5.31	6.49	7.13	BIB	6.41
1.02	4.47	NA	7.2	BIB	6.32
0.66	4.13	6.47	5.91	BIB	6.33
0.75	3.16	6.54	7.2	BIB	6.53
NA	5.01	NA	6.89	BIB	6.4
1.06	5.13	6.35	7.52	BIB	6.36
1.02	5.51	NA	6.69	BIB	6.5
1.03	5.11	NA	6.99	BIB	6.45
1.64	4.73	NA	7.56	BIB	6.51
0.94	4.68	6.39	7.57	BIB	6.44
0.79	6.26	6.52	6.28	BIB	6.39
0.94	5.16	6.59	6.98	BIB	6.49
1.23	5.62	6.57	6.81	BIB	6.53
1.47	5.13	6.37	6.75	BIB	6.52
1.12	5.71	6.44	6.55	BIB	6.45
0.84	5.11	6.42	8.13	BIB	6.42
1.32	5.8	NA	7.31	BIB	6.46
0.95	5.63	6.33	7.73	BIB	6.39
1	4.99	6.38	6.43	BIB	6.47
1.26	5.29	6.46	7.24	BIB	6.44
0.68	5.19	6.37	7.12	BIB	6.4
1.12	5.15	6.45	8.12	BIB	6.36
0.83	4.79	6.47	6.56	BIB	6.45
0.71	6.24	NA	NA	BIB	6.35
1.2	5.38	NA	NA	BIB	6.38
0.68	6.59	NA	6.51	BIB	6.21
0.84	4.57	6.34	7.14	BIB	6.25
1.19	5.21	6.75	6.7	BIB	6.21
1.16	4.87	6.2	7.86	BIB	6.18
1.26	4.92	6.32	6.94	BIB	6.31
1.13	5.27	6.28	6.63	BIB	6.16
0.83	4.98	6.22	7.41	BIB	6.21
0.87	4.97	6.04	6.65	BIB	6.15
1.09	6.05	6.3	6.59	BIB	6.33
1.3	5.84	6.39	6.6	BIB	6.3
1.01	4.65	NA	7.32	BIB	6.16
0.8	5.62	6.32	6.4	BIB	6.18
1.09	10.58	NA	10.17	EDEN	11.41
1	10.43	11.16	9.84	EDEN	11.44
1.08	8.72	NA	9.93	EDEN	11.04
NA	NA	11.5	NA	EDEN	11.73
0.84	11.49	10.83	10.49	EDEN	11.06
1.06	9.23	11.33	10.28	EDEN	11.23
0.97	8.78	11.03	10.2	EDEN	11.2
1.16	8.78	NA	9.56	EDEN	10.83
1.18	10.43	11.13	10.23	EDEN	11.2
0.9	8.58	10.84	9.83	EDEN	10.96
1.01	9.08	NA	8.92	EDEN	10.93
NA	NA	10.94	NA	EDEN	11.19
NA	NA	11.08	NA	EDEN	11.25
1.1	9.69	NA	9.42	EDEN	10.66
NA	NA	10.94	NA	EDEN	11.18
1.25	7.07	NA	9.33	EDEN	10.68
1.18	9.26	10.71	9.88	EDEN	10.92
0.84	9.64	NA	10.62	EDEN	11.06
1.15	9.41	10.95	9.69	EDEN	11.01
0.87	8.17	NA	10.46	EDEN	10.7
0.9	11.18	11.08	9.79	EDEN	11.11
0.81	8.91	10.56	10.72	EDEN	10.59
NA	NA	10.91	NA	EDEN	11.02
1.04	6.99	NA	10.2	EDEN	10.78
0.86	9.44	10.79	10.79	EDEN	10.82
0.88	9.13	10.33	8.88	EDEN	10.51
0.88	8.24	10.7	8.94	EDEN	10.76
1.08	8.03	10.78	9.79	EDEN	10.77
1.04	9.57	10.72	9.54	EDEN	10.85
1.64	7.25	10.46	9.34	EDEN	10.56
NA	9.86	10.52	10.34	EDEN	10.58
0.79	7.88	NA	10	EDEN	10.72
0.78	8.14	10.39	9.87	EDEN	10.54
1.23	8.5	10.15	10.04	EDEN	10.36
1.1	7.3	10.28	9.13	EDEN	10.2
0.88	6.98	NA	8.6	EDEN	10.19
1.24	7.79	NA	9.09	EDEN	10.24
0.91	6.7	10.27	10.63	EDEN	10.44
1.32	8.3	NA	10.04	EDEN	10.17
0.87	8.91	NA	9.78	EDEN	10.35
NA	NA	10.3	NA	EDEN	10.55
1.09	6.62	10.11	9.75	EDEN	10.38
1.23	8.84	NA	9.7	EDEN	9.96
0.92	7.73	10.11	9.68	EDEN	10.31
NA	NA	10.33	NA	EDEN	10.37
1.15	7.8	10.12	9.66	EDEN	10.25
NA	NA	10.74	NA	EDEN	10.75
NA	NA	10.28	NA	EDEN	10.39
0.95	7.8	10.22	10.27	EDEN	10.28
1.04	10.05	NA	10.36	EDEN	10.21
0.63	8	NA	9.89	EDEN	9.93
0.95	9.73	9.99	8.92	EDEN	9.97
0.93	8	9.94	10.55	EDEN	10.07
1.1	7.97	9.95	9.1	EDEN	10.05
0.93	8.63	9.37	10.15	EDEN	9.49
NA	NA	NA	9.13	EDEN	9.55
0.94	7.09	9.49	9.69	EDEN	9.49
1.02	6.36	NA	9.35	EDEN	9.65
0.98	6.92	NA	9.47	EDEN	9.38
1.07	7.12	9.2	9.08	EDEN	9.28
0.92	8.41	9.67	8.38	EDEN	9.67
1.26	9.17	11.27	10.33	EDEN	11.33
0.96	9.26	NA	8.68	EDEN	11.35
1.06	9.28	11.25	10.18	EDEN	11.31
1.08	9.66	NA	9	EDEN	11.76
0.96	8.53	11.16	9.36	EDEN	11.19
1	8.56	11.3	9.72	EDEN	11.46
1.17	8.59	NA	10.89	EDEN	11.18
0.98	9.61	NA	10.04	EDEN	11.35
1.23	8.17	NA	9.91	EDEN	11.63
0.85	8.65	NA	9.77	EDEN	11.09
NA	NA	11.54	NA	EDEN	11.77
0.93	10.17	NA	9.21	EDEN	11.16
0.81	8.78	NA	9.55	EDEN	11.33
1.25	8.2	11.18	9.65	EDEN	11.25
1.33	9.79	11.36	9.47	EDEN	11.38
0.98	8.65	11.35	9.8	EDEN	11.73
NA	NA	11.56	NA	EDEN	11.82
0.75	8.63	10.87	10.23	EDEN	11.03
0.73	8.66	NA	9.65	EDEN	11.12
NA	NA	11.18	NA	EDEN	11.35
0.7	10.37	NA	10.19	EDEN	11.04
1	9.03	10.89	10.34	EDEN	10.93
NA	NA	11.13	NA	EDEN	11.27
1.23	8.22	NA	9.83	EDEN	10.72
0.87	8.15	NA	9.16	EDEN	10.63
NA	NA	10.64	NA	EDEN	10.95
0.97	9.74	NA	9.71	EDEN	10.74
1.01	8.63	NA	NA	EDEN	10.56
NA	NA	10.5	NA	EDEN	10.91
0.98	8.56	10.4	10.79	EDEN	10.58
0.86	11.14	10.22	9.92	EDEN	10.32
0.83	7.3	10.64	8.77	EDEN	10.67
NA	NA	NA	10.14	EDEN	10.65
1.32	7.31	NA	9.58	EDEN	10.27
0.78	8.62	NA	9.52	EDEN	10.25
0.75	8.44	10.18	9.47	EDEN	10.22
1.28	10.55	NA	10.13	EDEN	10.41
0.95	7.75	9.89	7.94	EDEN	9.88
0.75	8.18	NA	10.59	EDEN	10.12
1.16	6.57	NA	10.16	EDEN	10.03
NA	NA	9.86	9.76	EDEN	9.78
0.89	8.23	NA	9.63	EDEN	9.83
NA	NA	9.66	NA	EDEN	9.71
NA	NA	11.56	NA	EDEN	12.08
0.97	10.62	11.58	11.41	EDEN	11.99
NA	NA	11.71	NA	EDEN	12.11
1.09	9.15	10.88	9.64	EDEN	11.31
1.11	10.3	11.16	NA	EDEN	11.41
0.98	11.44	11.35	9.46	EDEN	11.58
0.8	8.61	NA	8.7	EDEN	11.23
1.21	9.11	NA	10.13	EDEN	11.6
0.82	8.56	11.11	10.78	EDEN	11.24
1.1	7.13	11.11	10.42	EDEN	11.23
1.02	9.93	NA	10.79	EDEN	11.56
0.99	12.75	10.92	10.64	EDEN	11.26
0.96	11.03	11.2	9.53	EDEN	11.25
NA	NA	11.52	NA	EDEN	11.83
0.68	9.04	NA	10.92	EDEN	11.53
1.16	9.1	NA	10.15	EDEN	11.5
0.99	9.47	NA	10.14	EDEN	11.35
0.85	8.67	11.08	9.9	EDEN	11.34
0.91	8.09	11.32	10.95	EDEN	11.47
0.66	9.76	11.41	9.88	EDEN	11.49
0.78	9.4	NA	9.54	EDEN	11.6
NA	NA	11.37	NA	EDEN	11.72
0.84	8.04	11.63	10.88	EDEN	11.64
1.16	8.78	11.01	9.89	EDEN	11.06
0.95	8.93	NA	9.7	EDEN	11.09
0.68	10.18	NA	10.29	EDEN	10.86
1.6	8.6	NA	10.32	EDEN	11.16
1.17	9.04	10.97	9.85	EDEN	11.02
1.02	8.75	11.18	10.09	EDEN	11.36
0.87	8.12	NA	9.31	EDEN	10.96
1.09	7.29	NA	10.21	EDEN	10.91
1.22	8.42	NA	9.96	EDEN	10.98
0.67	9.52	10.86	9.27	EDEN	10.98
1.12	7.5	10.59	8.61	EDEN	10.9
0.8	8.49	10.95	10.09	EDEN	11.24
0.71	9.92	10.46	10.03	EDEN	10.95
0.66	9.76	NA	8.89	EDEN	10.98
0.95	9.42	NA	10.18	EDEN	11.05
0.91	7.74	NA	10.34	EDEN	11.04
0.93	9.08	NA	9.52	EDEN	11.08
1.05	9.59	10.85	9.31	EDEN	10.84
0.92	8.53	10.49	9.95	EDEN	10.68
1.05	8.26	10.7	10.41	EDEN	10.7
0.81	8.84	10.86	10.29	EDEN	10.78
0.74	9.05	10.68	9.67	EDEN	10.77
1.17	7.76	NA	10.38	EDEN	10.95
1.17	8.81	NA	10.05	EDEN	11.01
1.18	8.56	NA	9.24	EDEN	10.83
0.86	10.77	10.77	10.96	EDEN	10.57
1.33	8.57	10.36	NA	EDEN	10.41
0.85	8.91	10.39	9.38	EDEN	10.35
NA	NA	10.43	10.3	EDEN	10.67
1.09	8.45	10.72	10.09	EDEN	10.71
1.04	9.53	10.43	9.44	EDEN	10.51
NA	NA	10.84	NA	EDEN	10.88
0.81	9.07	NA	9.21	EDEN	10.39
0.86	9.02	NA	9.31	EDEN	10.42
NA	NA	10.69	NA	EDEN	10.59
1.42	8.54	NA	10.21	EDEN	10.35
1.05	9.02	10.37	9.71	EDEN	10.41
0.86	9.11	10.55	10.02	EDEN	10.69
NA	NA	10.24	NA	EDEN	10.61
NA	NA	10.51	NA	EDEN	10.53
0.97	7.04	9.81	9.28	EDEN	10.13
1.17	7.78	NA	9.77	EDEN	10.15
NA	NA	NA	10.06	EDEN	10.6
0.66	7.93	NA	9.83	EDEN	10.49
0.97	8.86	10.15	10.59	EDEN	10.02
1.3	8.69	10.35	11.38	EDEN	10.27
0.72	8.18	10.25	10.13	EDEN	10.16
1.06	9.02	10.11	9.96	EDEN	10.01
NA	NA	10.21	9.25	EDEN	10.16
NA	NA	6.49	6.64	KANC	6.53
1.11	6.21	6.36	7.1	KANC	6.3
0.73	5.14	NA	6.15	KANC	6.22
1.07	5.01	6.58	6.77	KANC	6.55
0.91	4.22	6.18	6.43	KANC	6.11
0.86	6.13	6.64	7.42	KANC	6.53
1.05	5.54	6.52	6.46	KANC	6.48
0.92	5.86	6.25	7.55	KANC	6.14
0.9	5.37	6.37	6.96	KANC	6.39
1.58	3.83	NA	6.1	KANC	6.08
0.69	6.47	NA	7.07	KANC	6.16
1.38	5.4	NA	6.37	KANC	6.16
1.09	5.43	6.49	7.06	KANC	6.35
0.85	4.38	6.59	6.7	KANC	6.45
0.72	5.97	6.49	7.28	KANC	6.41
1.1	5.96	6.34	6.84	KANC	6.14
0.73	5.23	6.16	7.44	KANC	6.05
0.94	6.27	NA	7.13	KANC	6.02
1.06	4.52	NA	6.44	KANC	5.63
0.88	4.37	6.28	7.39	KANC	6.13
1.43	4.81	6.59	6.93	KANC	6.41
0.85	5.1	6.09	6.66	KANC	5.87
0.96	5.43	NA	7.03	KANC	6.11
1.21	4.23	6.08	5.87	KANC	6.02
1.2	4.81	6.14	6.42	KANC	6.03
1.05	5.1	6.21	7.36	KANC	6.01
1	5.41	6.21	6.75	KANC	6.07
1	4.72	NA	6.71	KANC	6.32
1.08	6.58	NA	6.53	KANC	6.4
1.08	5.11	NA	6.13	KANC	6.06
0.97	5.26	6.16	8.02	KANC	6.09
0.72	4.03	5.74	5.48	KANC	5.51
1.08	6.16	6.22	6.5	KANC	6.03
1.01	5.16	6.28	7.11	KANC	6.03
1.07	3.77	6.14	6.98	KANC	6.03
0.9	5	6.3	6.66	KANC	6.23
1.04	4.77	6.13	7.08	KANC	6.03
0.95	5.64	5.73	6.67	KANC	5.52
0.96	4.59	NA	7.21	KANC	6.5
1.25	5.1	6.05	7.77	KANC	5.96
1.35	4.88	6.13	7.08	KANC	6.03
1.17	4.47	6.26	7.44	KANC	6.27
1.05	5.11	6.36	6.22	KANC	6.19
1.48	4.49	NA	7.08	KANC	5.75
1.06	6.3	6.19	7.67	KANC	6.04
1.14	5.29	5.58	7.78	KANC	5.44
0.97	5.72	5.62	7.05	KANC	5.45
0.86	4.99	6.19	6.97	KANC	6.02
0.88	5.36	5.93	6.64	KANC	5.71
0.93	4.02	6.29	6.83	KANC	6.13
0.94	5.24	6.24	6.36	KANC	6.13
1	4.74	6.22	7.47	KANC	6.13
1.1	4.31	6.55	5.6	KANC	6.4
1.14	4.28	6.67	7.57	KANC	6.46
NA	NA	6.13	6.43	KANC	6.12
1.07	4.05	6.3	7.51	KANC	6.12
1.1	5.92	6.29	7.36	KANC	6.11
0.69	5.72	6.16	NA	KANC	6.11
1.28	5.67	6.33	7.11	KANC	6.11
1.11	5.58	6.64	6.94	KANC	6.5
1.04	4.88	6.11	7.1	KANC	6.2
1.02	5.67	NA	6.03	KANC	6.22
1.06	4.01	NA	5.69	KANC	6.24
1.18	5.01	6.26	NA	KANC	6.13
0.97	5.53	7.12	6.04	KANC	6.93
0.97	4.41	6.65	5.5	KANC	6.46
0.92	6.48	7.06	7.81	KANC	6.92
1.04	5.06	6.67	6.85	KANC	6.5
0.92	7.04	6.65	6.93	KANC	6.41
1.01	6.2	7.1	7.22	KANC	7.11
0.9	5.92	NA	6.23	KANC	6.62
1.13	5.87	7.01	7.33	KANC	6.76
0.96	5.44	6.34	6.58	KANC	6.27
1.07	5.91	NA	7.24	KANC	6.89
0.75	5.44	NA	6.84	KANC	5.9
0.7	5.91	NA	7.35	KANC	6.43
1.26	4.69	NA	7.89	KANC	6.33
1.03	4.81	7.28	NA	KANC	7.2
1.14	6.09	6.43	7.15	KANC	6.24
1.13	5.78	6.81	6.42	KANC	6.75
1.04	5.23	NA	7.67	KANC	6.12
1.18	5.81	6.82	7.71	KANC	6.66
0.91	4.35	7.45	7.24	KANC	7.42
0.89	6.56	7.22	6.82	KANC	7.19
0.85	5.77	NA	7.59	KANC	7.77
1.2	6.13	7.16	7.08	KANC	7.02
1.03	6.15	7.34	6.16	KANC	7.4
0.76	6.63	NA	8.03	KANC	7.76
0.91	7.17	7.63	7.51	KANC	7.75
0.91	6.78	7.37	6.9	KANC	7.4
1.07	6.91	7.4	8.21	KANC	7.34
0.96	5.85	7.88	7.4	KANC	7.81
0.69	5.53	7.47	6.41	KANC	7.32
1.05	4.48	7.05	7.85	KANC	6.91
1.12	5.36	6.72	6.18	KANC	6.7
NA	NA	NA	5.71	KANC	6.77
0.77	5.57	7.07	8.04	KANC	7.13
0.91	5.34	6.68	6.62	KANC	6.62
0.95	4.91	7.07	7.07	KANC	6.98
0.93	5.5	7.13	7.15	KANC	6.97
1.19	5.72	7.02	7.03	KANC	6.97
1.06	5.64	6.55	6.66	KANC	6.53
0.96	6.55	6.96	8.23	KANC	7.02
1.1	4.55	6.95	NA	KANC	6.88
0.78	4.97	NA	6.51	KANC	6.95
1.06	5.41	NA	6.73	KANC	6.19
0.7	5.96	7.22	6.5	KANC	7.07
1	4.82	7.55	6.85	KANC	7.47
1.09	6.55	6.96	6.8	KANC	6.88
0.75	5.27	6.63	6.28	KANC	6.48
0.85	6.42	6.41	6.4	KANC	6.36
1.19	4.06	6.65	7.4	KANC	6.5
1.11	5.25	6.42	7.84	KANC	6.32
1.3	4.84	6.15	6.09	KANC	6.03
1.01	4.37	NA	5.86	KANC	6.27
1.05	6.53	NA	7.64	KANC	6.85
1.53	6.66	6.82	7.16	KANC	6.85
0.98	5.78	7.41	7.05	KANC	7.43
1.18	5.75	6.8	6.67	KANC	6.7
0.86	4.81	6.34	6.71	KANC	6.21
0.81	5.31	7.08	6.72	KANC	6.98
1.03	4.93	6.38	6.82	KANC	6.3
0.8	5.81	NA	6.53	KANC	6.15
1	5.09	7.14	7.19	KANC	7.02
0.95	7.27	NA	7.39	KANC	7.11
0.91	5.34	6.21	7.21	KANC	6.06
0.78	6.28	6.76	6.71	KANC	6.5
0.89	5.36	7.02	6.42	KANC	6.94
1.01	5.76	6.32	7.39	KANC	6.2
0.81	4.14	5.61	6.24	KANC	5.5
0.9	4.98	6.46	6.08	KANC	6.25
0.96	5.08	6.14	NA	KANC	6.16
0.84	5.17	7.36	7.63	KANC	7.28
0.87	5.07	6.93	6.65	KANC	7.02
0.86	5.68	7.02	7.41	KANC	6.98
1.23	5.73	NA	6.08	KANC	6.83
NA	5.48	6.58	8.02	KANC	6.5
0.67	5.41	NA	7.12	KANC	6.49
0.97	5.03	6.86	8.1	KANC	6.78
0.74	6.21	NA	7.35	KANC	6.47
0.95	5.21	6.74	6.4	KANC	6.75
0.97	5.17	6.84	7.57	KANC	6.83
1.05	5.17	6.84	7.38	KANC	6.8
1.16	4.62	7.24	6.88	KANC	6.89
0.92	6.05	6.31	5.95	KANC	6.17
0.92	4.75	6.67	NA	KANC	6.43
1.2	6.18	6.94	7.17	KANC	6.91
0.96	5.57	6.22	6.72	KANC	6.15
0.77	5.09	6.11	7.08	KANC	6
1.35	4.53	NA	6.9	KANC	6.48
0.98	5.21	7.24	6.3	KANC	7.01
1.1	5.73	NA	6.87	KANC	7
1.36	5.33	NA	7.59	KANC	6.82
1.03	5.98	NA	7.17	KANC	6.24
NA	NA	6.16	6.98	KANC	6.09
0.97	6.37	6.93	6.91	KANC	6.88
1.02	6.04	NA	6.51	KANC	6.48
1.07	4.92	6.62	6.13	KANC	6.5
1.19	6.28	NA	6.95	KANC	6.52
1.05	6.29	NA	7.93	KANC	7.33
0.92	5.5	7.13	5.61	KANC	7.19
1.09	5.37	7.26	6.83	KANC	7.02
0.82	5.73	NA	6.62	KANC	6.63
1.11	5.99	NA	7.18	KANC	7.03
0.81	5.98	6.09	7.06	KANC	5.86
0.94	6.15	NA	7.69	KANC	7.69
NA	NA	7.07	NA	KANC	6.97
0.98	7.35	7.55	8.81	KANC	7.59
0.8	6.83	7.62	7.09	KANC	7.72
0.98	6.45	7.11	7.64	KANC	6.93
0.63	4.73	6.69	6.61	KANC	6.67
0.8	4.23	6.23	6.82	KANC	6.19
0.92	4.7	6.13	6.63	KANC	6.08
NA	4.49	NA	7.61	KANC	6.17
1	5.45	NA	6.69	KANC	6.07
0.78	5.38	6.65	7.39	KANC	6.49
1.01	6.05	6.59	7.36	KANC	6.47
1.11	5.75	NA	6.29	KANC	6.34
1.02	5.57	6.07	6.22	KANC	6.01
1.08	6.13	6.89	7.44	KANC	6.85
1.05	5.31	6.16	6.77	KANC	6
1.11	5.72	NA	7.06	KANC	6.32
1.05	4.66	6.18	7.3	KANC	5.93
0.9	4.99	NA	7.01	KANC	6.37
0.8	5.49	NA	5.62	KANC	6.32
NA	NA	6.89	7.91	KANC	6.7
0.92	5.8	6.35	7.41	KANC	6.34
0.87	5.15	6.84	8.14	KANC	6.57
0.86	5	6.4	7.18	KANC	6.21
0.95	6.05	NA	7.75	KANC	6.19
0.88	5.09	NA	7.42	KANC	6.39
1.12	5.79	NA	6.2	KANC	5.71
0.96	4.87	6.54	6.18	KANC	6.49
1.21	5.78	NA	5.82	KANC	6.29
1.11	5.09	6.11	7.57	KANC	6.12
0.98	5.84	NA	6.88	KANC	6.13
0.98	7.09	6.47	6.7	KANC	6.35
1.29	6.36	5.95	7.26	KANC	5.77
0.99	5.82	6.32	6.43	KANC	6.19
0.82	5.36	6.6	6.73	KANC	6.56
0.94	6.07	6.11	5.72	KANC	6.13
0.89	5.3	6.2	6.6	KANC	6.13
1.05	4.39	6.13	6.64	KANC	6.18
0.93	5.64	6.29	8.04	KANC	6.15
1.14	6.21	9.1	8.37	MOBA	9.39
0.86	6.65	8.64	7.82	MOBA	8.76
1.17	7.98	8.43	8.73	MOBA	8.33
0.72	6.22	8.71	8.92	MOBA	8.72
1.09	5.52	NA	7.46	MOBA	8.39
1.28	5.89	NA	8.55	MOBA	8.12
0.9	7.22	NA	9.06	MOBA	8.69
1.07	7.67	9.11	8.31	MOBA	9.37
1.25	7.24	8.64	8.58	MOBA	8.64
0.84	5.84	8.7	9.39	MOBA	8.83
0.86	6.87	8.51	8.48	MOBA	8.6
1.16	6.63	8.53	8.55	MOBA	8.52
0.96	4.85	8.03	8.54	MOBA	8.13
0.94	6.5	8.51	9.46	MOBA	8.56
0.92	6.2	8.72	7.61	MOBA	8.69
0.95	6.57	8.34	7.67	MOBA	8.35
0.83	6.85	8.47	8.12	MOBA	8.57
1	6.18	8.72	8.39	MOBA	8.58
1.32	6.37	8.58	8.27	MOBA	8.67
1.15	7.81	NA	9.34	MOBA	8.27
1.29	5.96	8.48	8.17	MOBA	8.32
0.92	6.62	8.31	9.21	MOBA	8.26
0.97	6.96	9.17	8.97	MOBA	9.29
NA	NA	NA	7.98	MOBA	8.96
0.94	6.69	8.2	8.7	MOBA	8.27
1.33	5.95	8.82	8.87	MOBA	8.89
1.49	8.15	8.58	8.96	MOBA	8.59
1.03	6.48	9.29	NA	MOBA	9.48
1.43	6.17	8.48	8.82	MOBA	8.47
0.87	7.65	9	8.87	MOBA	9.14
1.11	6.8	8.73	9.27	MOBA	8.7
0.75	6.76	8.83	9.47	MOBA	8.99
0.92	7.02	8.7	9.04	MOBA	8.75
0.95	5.77	8.87	8.88	MOBA	8.93
1.15	7.08	9.18	8.63	MOBA	9.19
0.92	5.97	8.72	9.23	MOBA	8.75
NA	6.08	8.71	8.16	MOBA	8.84
0.98	6.42	8.49	NA	MOBA	8.62
1.32	6.99	9.34	8.2	MOBA	9.45
1.2	6.11	8.71	8.64	MOBA	8.8
1.21	7.07	8.85	8.89	MOBA	8.65
0.94	6.71	8.79	8.34	MOBA	8.94
0.92	6.66	9.16	8.59	MOBA	9.3
0.85	8.14	8.45	7.03	MOBA	8.52
1.02	5.68	7.94	7.74	MOBA	8.02
0.77	6.15	8.14	7.94	MOBA	8.06
0.83	7.39	6.96	8.72	MOBA	6.98
NA	NA	8.86	9.08	MOBA	8.75
0.98	5.91	7.89	8.8	MOBA	7.96
1.1	5.4	7.99	8.87	MOBA	8.18
0.8	7.31	8.35	7.45	MOBA	8.42
0.76	5.52	8.01	8.56	MOBA	7.95
1.19	5.16	7.02	8.2	MOBA	6.93
0.89	6.95	7.99	8.45	MOBA	8.07
0.77	5.37	8.64	7.94	MOBA	8.65
1	6.35	8.16	7.21	MOBA	8.13
1.05	6.96	8.17	9.48	MOBA	8.36
1.06	5.74	8.3	8.41	MOBA	8.31
0.82	7.75	NA	8.92	MOBA	8.92
1.19	7.85	9.1	9.06	MOBA	9.15
NA	NA	NA	8.3	MOBA	8.1
0.88	5.79	8.56	8.3	MOBA	8.55
0.85	9.04	NA	8.22	MOBA	8.17
1.21	6.65	8.32	NA	MOBA	8.33
1.54	6.91	8.49	8.31	MOBA	8.74
0.99	6.26	8.68	7.73	MOBA	8.64
1.23	5.01	8	8.45	MOBA	8.11
1.04	6.06	8.12	8.36	MOBA	8.16
0.85	6.72	8.18	7.19	MOBA	8.3
1.28	5.39	8.87	7.9	MOBA	8.85
1.42	5.33	6.99	8.31	MOBA	7.02
1.15	7.24	8.1	7.66	MOBA	8.15
1.02	6.46	8.57	8.74	MOBA	8.83
1.09	7.31	8.79	8.58	MOBA	8.88
1.41	7.28	8.17	8.38	MOBA	8.19
0.87	6.08	8.22	9.14	MOBA	8.32
0.8	4.72	6.95	7.76	MOBA	6.96
1.26	5.58	8.16	7.62	MOBA	8.07
1	6.92	NA	8.26	MOBA	8.3
1.32	7.22	8.78	8.24	MOBA	8.89
1.37	6.31	8.25	8.45	MOBA	8.24
0.89	6.06	8.14	7.56	MOBA	8.07
1.05	7.34	9.38	8.26	MOBA	9.51
1.12	5.8	8.31	8.31	MOBA	8.36
1.1	5.75	8.89	8.78	MOBA	8.92
0.96	5.29	7.95	NA	MOBA	8.12
0.91	4.88	7.08	7.58	MOBA	6.92
1.08	6.74	8.07	8.61	MOBA	8.11
0.98	6.6	NA	7.88	MOBA	8.69
1.19	5.82	8.15	9.39	MOBA	8.04
1.05	5.54	7.05	8.54	MOBA	6.96
0.92	7.02	8.11	8.76	MOBA	8.13
0.92	6.28	8.19	7.98	MOBA	8.08
1.18	6.97	NA	7.43	MOBA	8.29
1.09	6.86	8.11	7.69	MOBA	8.14
1.13	3.71	7.11	7.81	MOBA	6.98
0.9	6.95	8.39	8.59	MOBA	8.28
NA	NA	NA	8.39	MOBA	8.46
0.9	6.23	8.42	8.59	MOBA	8.33
0.9	5.53	8.42	8.11	MOBA	8.56
1.21	5.86	8.07	8.36	MOBA	8.06
1.14	6.99	8.33	8.28	MOBA	8.35
1.19	6.14	8.21	8.01	MOBA	8.13
0.78	5.09	6.95	7.4	MOBA	6.97
1.13	7.08	8.43	8.43	MOBA	8.45
0.67	6.3	8.69	9.44	MOBA	8.64
0.65	5.5	8.17	8.34	MOBA	8.19
1.23	6.24	8.32	8.71	MOBA	8.41
1.42	6.39	8.16	7.44	MOBA	8.13
0.96	7.1	8.18	7.26	MOBA	8.28
0.99	6.76	8.17	7.59	MOBA	8.19
NA	NA	7.3	NA	MOBA	7.26
0.98	7.29	8.49	7.97	MOBA	8.6
NA	NA	NA	7.04	MOBA	8.1
1.1	6	8.56	8.55	MOBA	8.48
0.87	6.65	8.48	9.46	MOBA	8.38
0.99	5.78	8.35	7.92	MOBA	8.45
1.04	7.62	8.8	8.82	MOBA	8.91
0.92	6.62	8.16	7.56	MOBA	8.17
0.98	7.33	8.45	9.22	MOBA	8.44
NA	NA	8.27	NA	MOBA	8.36
0.91	7.6	NA	8.57	MOBA	8.23
1.17	5.01	8.74	9.02	MOBA	8.88
0.9	5.99	8.13	8.04	MOBA	8.2
0.79	7.02	8.68	8.27	MOBA	8.92
1.07	7.54	8.14	9.4	MOBA	8.28
0.82	6.59	8.7	8.75	MOBA	8.88
1.13	7.97	8.58	8.33	MOBA	8.66
1.27	7.86	7.96	7.67	MOBA	8.04
0.81	6.71	8.67	8.82	MOBA	8.83
NA	NA	8.65	8.58	MOBA	8.61
0.83	7.95	8.04	8.67	MOBA	8.1
0.82	5.56	8.36	8.05	MOBA	8.35
1.36	6.65	7.97	7.5	MOBA	8.04
NA	NA	8.17	NA	MOBA	8.19
NA	NA	8.83	NA	MOBA	9.16
1.14	4.89	8.06	7.79	MOBA	8.19
1.34	6.73	8.96	8.57	MOBA	8.92
0.94	7.92	8.75	9.43	MOBA	8.85
1.07	7.64	8	7.52	MOBA	8.09
1.02	5.68	7.91	8.41	MOBA	8.06
NA	NA	8.19	NA	MOBA	8.27
0.9	5.59	8.09	9.41	MOBA	8.04
0.92	6.52	8.45	7.71	MOBA	8.48
NA	NA	7.24	NA	MOBA	7.2
0.72	7.11	8.07	8.07	MOBA	8.03
0.99	6.78	7.92	8.67	MOBA	8.16
NA	NA	8.68	8.51	MOBA	8.71
1.14	5.66	8.05	7.98	MOBA	8.16
1.42	5.72	8.1	7.85	MOBA	8.31
NA	NA	8.54	6.88	MOBA	8.67
0.99	5.82	8.3	8.33	MOBA	8.19
NA	NA	8.03	NA	MOBA	8.23
NA	NA	8.47	NA	MOBA	8.44
0.55	7.09	8.75	9.14	MOBA	8.86
NA	NA	8.53	NA	MOBA	8.63
NA	NA	8.06	NA	MOBA	8.21
0.82	7.55	8.27	7.21	MOBA	8.3
1.06	7.06	8.94	8.49	MOBA	9.03
0.9	5.48	8.12	8.94	MOBA	8.07
0.53	9.35	9.38	8.53	MOBA	9.8
NA	NA	NA	8.15	MOBA	8.2
0.9	4.96	7.3	7.5	MOBA	7.23
NA	NA	8.23	NA	MOBA	8.23
1.02	6.2	8.23	7.65	MOBA	8.09
1.1	7.13	9.22	8.77	MOBA	9.44
NA	NA	8.29	NA	MOBA	8.38
NA	NA	8.55	NA	MOBA	8.76
0.7	6.07	8.2	8.97	MOBA	8.16
NA	NA	8.09	NA	MOBA	8.12
NA	NA	9.05	NA	MOBA	9.3
NA	NA	8.09	NA	MOBA	8.17
NA	NA	NA	8.72	MOBA	8.96
0.65	7.71	9.42	8.88	MOBA	9.53
NA	NA	8.65	NA	MOBA	8.63
NA	NA	8.09	NA	MOBA	8.06
NA	NA	8.45	NA	MOBA	8.39
NA	NA	8.04	NA	MOBA	8.16
NA	NA	8.14	NA	MOBA	8.27
0.9	8.7	9.1	9.1	MOBA	9.08
NA	NA	8.12	NA	MOBA	8.12
1.27	7.85	9	9.27	MOBA	9.07
NA	NA	8.07	NA	MOBA	8.09
NA	NA	8.14	NA	MOBA	8.12
NA	NA	8.06	NA	MOBA	8.07
NA	NA	8.4	NA	MOBA	8.65
NA	NA	8.32	NA	MOBA	8.25
NA	NA	8.09	NA	MOBA	8.07
NA	NA	8.08	NA	MOBA	8.17
NA	NA	8.38	NA	MOBA	8.35
1.05	6.51	NA	8.84	MOBA	8.57
NA	NA	8.18	NA	MOBA	8.23
NA	NA	8.08	NA	MOBA	8.01
NA	NA	7.9	NA	MOBA	8.07
NA	NA	8.12	NA	MOBA	8.23
NA	NA	8.03	NA	MOBA	8.22
NA	NA	8.39	NA	MOBA	8.49
NA	NA	8.04	NA	MOBA	8.12
NA	NA	8.15	NA	MOBA	8.16
1.08	7.13	8.74	9.14	MOBA	8.64
NA	NA	9.14	NA	MOBA	9.29
NA	NA	7.99	NA	MOBA	8.07
NA	NA	9.28	NA	MOBA	9.41
NA	NA	8.15	NA	MOBA	8.3
0.52	8.19	8.63	9.42	MOBA	8.57
0.99	5.88	8.83	8.99	MOBA	8.93
1.13	6.12	8.85	7.54	MOBA	8.95
0.83	6.84	9.3	9.12	MOBA	9.45
0.8	6.72	8.91	9.04	MOBA	8.89
1.07	6.96	8.76	8.9	MOBA	8.84
0.92	6.13	9.29	9.21	MOBA	9.56
0.65	8.24	9.08	9.42	MOBA	8.96
0.83	7.98	8.69	9.14	MOBA	8.76
NA	NA	8.64	9.54	MOBA	8.92
NA	NA	8.69	8.62	MOBA	8.67
1.05	6.32	8.72	9.88	MOBA	8.87
0.89	7.86	9.51	9.53	MOBA	9.62
1.1	6.53	8.94	8.62	MOBA	8.88
1.32	7.09	8.76	9.32	MOBA	8.76
1.27	5.97	8.78	8.35	MOBA	8.73
1.16	8.19	8.91	8.81	MOBA	8.91
0.92	7.23	8.72	8.17	MOBA	8.82
0.91	7.84	8.91	8.51	MOBA	9.16
0.83	6.07	8.68	8.61	MOBA	8.7
0.94	6.28	8.65	8.63	MOBA	8.73
1.13	6.06	8.95	9.78	MOBA	8.9
1.16	6.88	8.63	8.54	MOBA	8.83
0.74	7.35	8.54	7.99	MOBA	8.72
0.86	6.8	8.7	9.21	MOBA	8.57
1.04	8.14	8.58	8.72	MOBA	8.68
0.79	7.72	NA	9.65	MOBA	8.78
1.04	5.85	9.01	8.35	MOBA	9.02
1.37	6.14	8.81	9.03	MOBA	8.87
1.51	6.57	8.74	8.71	MOBA	8.7
1.23	6	8.55	8.29	MOBA	8.7
0.9	5.68	8.68	7.97	MOBA	8.88
1.01	7.18	9.17	9.57	MOBA	9.19
1.06	5.85	8.98	9.4	MOBA	8.99
0.87	6.54	8.73	8.7	MOBA	8.65
0.94	7.77	NA	8.93	MOBA	8.51
1.14	5.77	7.87	8.03	MOBA	7.78
1.09	6.67	8.31	8.56	MOBA	8.52
1.1	6.89	NA	7.92	MOBA	8.17
0.91	5.65	8.37	8.88	MOBA	8.34
0.73	6.35	8.25	8.23	MOBA	8.32
0.95	6.97	8.28	8.65	MOBA	8.48
1.21	6.91	8.6	9.03	MOBA	8.62
1.15	7.28	8.12	8.14	MOBA	8.17
1.02	7.5	NA	8.36	MOBA	8.67
1.36	6.14	8.46	8.6	MOBA	8.43
NA	NA	NA	8.44	MOBA	8.6
0.89	5.93	8.04	8.18	MOBA	8.15
0.91	5.74	8.15	8.45	MOBA	8.08
0.96	6.57	NA	8.41	MOBA	8.62
1.01	7.3	8.45	7.74	MOBA	8.55
1.13	7.09	8.3	8.66	MOBA	8.42
1.15	6.18	8.18	8.47	MOBA	8.23
0.9	8.22	8.71	9.06	MOBA	8.72
NA	NA	8.29	8.24	MOBA	8.18
1.19	6.59	8.62	10.66	MOBA	8.55
1.03	7.24	8.8	9.29	MOBA	8.95
1.08	6.24	8.45	9.31	MOBA	8.5
1.13	5.99	8.33	8.99	MOBA	8.3
1.07	5.68	8.26	8.33	MOBA	8.43
0.88	6.52	8.64	8.48	MOBA	8.58
1.1	7.18	8.53	8.68	MOBA	8.51
1.05	7.17	8.58	8.53	MOBA	8.6
1.68	6.15	8.26	8.74	MOBA	8.43
1.19	4.76	6.57	6.93	RHEA	6.42
1.42	7.09	7.51	6.95	RHEA	7.54
0.99	5.49	6.54	6.26	RHEA	6.46
0.92	5.29	6.5	6.94	RHEA	6.49
0.82	4.79	6.42	5.75	RHEA	6.47
0.96	6.01	6.56	6.96	RHEA	6.39
0.92	6.06	7.46	7.23	RHEA	7.33
0.87	4.81	6.59	7.14	RHEA	6.43
1.35	5.46	6.86	7.17	RHEA	6.86
0.97	4.4	6.53	6.75	RHEA	6.39
1.08	4.25	6.42	5.73	RHEA	6.4
0.98	5.54	6.52	5.45	RHEA	6.35
0.89	4.66	6.42	6.14	RHEA	6.33
0.87	5.01	6.81	6.89	RHEA	6.86
1.34	5.03	6.54	7.14	RHEA	6.58
0.99	5.11	6.61	6.88	RHEA	6.41
0.96	5.34	6.44	6.7	RHEA	6.39
1.06	5.03	6.33	7.87	RHEA	6.28
1.33	4.82	NA	7.95	RHEA	6.89
1.26	4.79	6.3	6.29	RHEA	6.12
1.05	5.57	6.46	7.22	RHEA	6.28
0.88	4.88	6.52	7.07	RHEA	6.41
1.25	4.21	6.51	6.82	RHEA	6.43
0.95	5.39	6.41	6.96	RHEA	6.44
0.92	5.8	6.44	5.31	RHEA	6.43
1.23	5.41	6.44	6.02	RHEA	6.29
1.02	5.25	6.53	6.97	RHEA	6.36
1.11	5.29	6.44	7.42	RHEA	6.42
1.11	6.46	NA	6.41	RHEA	6.1
1.41	5.16	6.04	6.06	RHEA	6.02
1.07	6.08	6.39	5.45	RHEA	6.3
0.92	4.36	6.39	6.74	RHEA	6.34
1.26	5.73	NA	6.44	RHEA	6.52
1.16	5.51	7.06	6.8	RHEA	7.16
0.81	4.32	6.47	5.65	RHEA	6.34
1	4.64	6.63	6.41	RHEA	6.41
1.11	6.06	7.17	7.58	RHEA	7.16
1.04	4.92	7	7.39	RHEA	6.99
1.36	5.12	6.18	5.57	RHEA	6.23
1.45	4.17	6.49	5.89	RHEA	6.37
0.86	4.99	6.79	7.86	RHEA	6.65
1.02	4.77	6.36	6.6	RHEA	6.33
0.83	4.73	6.13	6.39	RHEA	6.12
1.16	4.94	NA	6.37	RHEA	6.61
0.97	4.42	6.26	6.55	RHEA	6.17
1.19	5.04	NA	NA	RHEA	6.41
0.87	5.62	6.68	6.27	RHEA	6.49
0.85	4.24	6.3	6.28	RHEA	6.35
1.02	4.95	6.43	5.32	RHEA	6.36
0.96	4.35	6.59	7.42	RHEA	6.5
1.25	4.54	NA	7.53	RHEA	6.39
0.89	4.39	6.56	7.13	RHEA	6.44
1.24	6.29	7.18	7.32	RHEA	7.18
0.98	5.3	6.7	6.89	RHEA	6.51
1.27	5.06	7.04	7.34	RHEA	7.12
0.88	5.54	7.03	6.99	RHEA	7.08
0.73	4.84	6.73	6	RHEA	6.49
1.66	5.06	7.08	6.65	RHEA	6.92
1	5.28	6.8	7.48	RHEA	6.88
1.15	5.2	6.62	6.29	RHEA	6.68
0.97	4.45	7.01	7.63	RHEA	7.01
0.88	5.13	7.17	7.49	RHEA	7.09
1.1	5.53	7.39	7.25	RHEA	7.47
1.13	4.94	6.63	5.74	RHEA	6.51
0.97	5.42	6.67	7.15	RHEA	6.35
1.03	4.76	NA	6.71	RHEA	6.49
1.1	4.63	6.62	6.64	RHEA	6.45
0.89	5.72	NA	6.66	RHEA	6.45
1.29	4.68	6.43	6.37	RHEA	6.44
0.86	5.11	6.48	NA	RHEA	6.46
1.1	6.64	6.82	6.18	RHEA	6.81
1.11	4.61	NA	7.37	RHEA	6.46
1.23	4.49	6.5	7.26	RHEA	6.5
0.95	5.54	7.12	6.11	RHEA	7.07
0.89	6.34	7.23	6.93	RHEA	7.16
0.98	5.17	6.45	6.53	RHEA	6.25
0.92	4.87	6.73	6.73	RHEA	6.54
0.93	6.11	6.44	6.62	RHEA	6.37
1.08	5.19	6.42	6.73	RHEA	6.3
1.14	4.77	6.67	7.01	RHEA	6.61
1.25	5.09	6.33	5.37	RHEA	6.27
1.03	5.25	NA	6.07	RHEA	6.3
1.09	4.98	6.95	5.83	RHEA	6.82
1.14	4.11	NA	6.12	RHEA	6.51
0.93	5.61	6.33	6.31	RHEA	6.36
0.97	4.09	6.79	6.1	RHEA	6.71
1.05	6.05	NA	7.12	RHEA	6.04
1.15	4	6.54	6.69	RHEA	6.44
0.84	5.67	NA	6.85	RHEA	6.97
0.84	5.18	6.64	5.94	RHEA	6.57
0.85	4.4	6.47	7.32	RHEA	6.38
0.88	6.9	7.06	6.87	RHEA	6.92
0.96	5.13	7.07	7.52	RHEA	6.99
1.11	5	6.74	6.35	RHEA	6.59
0.94	5.15	NA	6.52	RHEA	6.84
NA	5.63	NA	6.18	RHEA	6.51
0.8	4.68	6.56	7.24	RHEA	6.63
0.87	4.94	NA	5.92	RHEA	6.02
0.8	5.89	6.82	7.05	RHEA	6.51
0.78	4.54	6.76	7.18	RHEA	6.84
1.58	4.97	6.62	7.27	RHEA	6.55
1.03	5.05	6.55	7.69	RHEA	6.48
1.09	5.2	7.06	5.74	RHEA	7.12
1.32	5.44	6.61	NA	RHEA	6.45
0.75	5.47	6.38	7.06	RHEA	6.43
0.88	6.4	6.83	7.75	RHEA	6.85
1.21	5.84	6.45	7.95	RHEA	6.33
0.98	5.19	6.63	6.83	RHEA	6.48
0.94	4.58	6.51	6.65	RHEA	6.42
1.04	3.67	6.53	6.67	RHEA	6.32
1.09	4.96	6.47	6.89	RHEA	6.36
0.88	5.19	NA	6.91	RHEA	6.12
1.14	4.81	NA	6.49	RHEA	6.44
1.06	5.11	6.81	7.24	RHEA	6.56
1.2	4.33	6.38	6.1	RHEA	6.47
0.9	4.73	6.44	5.38	RHEA	6.34
1.17	5.45	6.12	7.21	RHEA	6.03
1.09	6.11	6.64	NA	RHEA	6.57
1.16	4.06	NA	6.12	RHEA	6.47
0.97	4.86	6.52	6.66	RHEA	6.39
0.63	5.53	6.88	7.02	RHEA	6.7
0.86	4.61	6.46	6.06	RHEA	6.54
0.64	5.42	6.85	7.47	RHEA	6.6
1.18	6.5	NA	6.41	RHEA	7.52
0.72	6.4	NA	7.46	RHEA	6.4
1.19	3.91	NA	5.59	RHEA	6.48
1.08	5.92	6.62	7.79	RHEA	6.51
1.41	5.09	6.39	5.93	RHEA	6.36
0.9	5.62	6.43	6.89	RHEA	6.34
0.81	3.86	6.96	7.1	RHEA	6.75
1.31	4.61	NA	6.97	RHEA	6.49
1.24	5.86	6.59	6.48	RHEA	6.49
1.22	4.86	NA	6.27	RHEA	6.34
1.03	5.53	7.1	6.7	RHEA	7.15
1	6.04	6.67	6.91	RHEA	6.68
0.87	4.65	NA	6.27	RHEA	6.36
1.08	4.81	6.45	5.89	RHEA	6.39
1.09	4.01	6.33	7.08	RHEA	6.36
1.39	4.64	6.45	6.65	RHEA	6.44
1.1	4.19	6.61	5.88	RHEA	6.5
0.82	4.37	6.15	5.79	RHEA	6.04
1.33	5.02	6.44	NA	RHEA	6.49
0.97	5.62	6.52	NA	RHEA	6.41
1.16	6.4	6.56	8.27	RHEA	6.41
1.15	4.23	6.39	6.71	RHEA	6.39
1.16	4.36	NA	5.78	RHEA	6.55
1.07	3.69	6.66	6.9	RHEA	6.47
1.16	5.42	6.73	7.58	RHEA	6.6
0.76	5.89	6.83	7.39	RHEA	6.73
1.18	5.01	6.53	7.38	RHEA	6.48
1.11	5.27	6.62	7.33	RHEA	6.5
1.09	6.03	6.8	7.05	RHEA	6.76
0.85	5.05	NA	5.95	RHEA	6.49
1.23	4.77	6.49	6.51	RHEA	6.39
0.93	4.94	6.59	6.38	RHEA	6.32
1.25	5.67	6.37	6.99	RHEA	6.32
0.8	5.58	NA	6.54	RHEA	6.88
1.06	3.61	6.32	7.37	RHEA	6.29
0.67	6.3	NA	5.64	RHEA	6.72
0.89	5.98	NA	6.42	RHEA	6.6
1	4.58	6.44	5.92	RHEA	6.45
0.86	4.96	NA	5.83	RHEA	6.25
1.17	4.94	6.47	6.27	RHEA	6.26
1	5.19	NA	6.11	RHEA	6.59
1.08	3.96	NA	6.41	RHEA	6.04
1.66	5.54	6.27	8.06	RHEA	6.27
0.99	4.7	6.74	6.19	RHEA	6.58
0.94	4.85	6.64	6.54	RHEA	6.56
1	5.45	6.32	6.22	RHEA	6.28
1.04	4.79	NA	6.49	RHEA	6.27
0.81	5.64	NA	7.65	RHEA	6.77
0.76	4.5	6.38	7.29	RHEA	6.28
0.78	5.39	6.96	6.45	RHEA	6.88
1.24	5.23	6.78	6.84	RHEA	6.76
1.03	5.66	6.65	6.37	RHEA	6.5
0.85	4.65	NA	7.91	RHEA	6.68
1.48	4.93	6.64	7.31	RHEA	6.5
1.2	5.07	NA	6.59	RHEA	6.65
1.01	5.62	6.63	6.27	RHEA	6.52
1.15	4.87	6.47	6.63	RHEA	6.4
0.73	5.08	NA	6.11	RHEA	6.31
1.08	4.84	6.73	7.14	RHEA	6.48
1.2	5.09	NA	7.34	RHEA	6.52
0.96	5.21	6.32	8.39	RHEA	6.12
1.04	5.52	6.72	6.86	RHEA	6.68
1.16	4.27	NA	NA	RHEA	6.54
1.18	5.33	6.68	7.62	RHEA	6.77
1.51	5.28	6.33	6.49	RHEA	6.14
0.99	5.12	NA	6.77	RHEA	6.64
1.07	3.93	NA	6.81	RHEA	6.26
1.13	4.79	6.51	6.91	RHEA	6.36
1.22	5.99	NA	6.78	RHEA	6.45
0.79	4.56	6.45	6.36	RHEA	6.48
1.15	6.01	6.64	6.22	RHEA	6.62
1.03	4.92	6.25	6.22	RHEA	6.38
1.17	5.45	6.49	6.59	RHEA	6.45
0.88	4.52	6.57	6.53	RHEA	6.34
1.31	4.83	6.64	7.18	RHEA	6.45
1.02	5.04	6.9	6.48	RHEA	6.81
0.82	8.4	9.13	9.39	INMA	9.03
1.2	9.52	9.96	9.1	INMA	9.99
1.02	7.98	9.19	8.72	INMA	9.26
0.88	7.95	8.7	7.91	INMA	8.85
0.87	6.65	9.79	8.68	INMA	9.91
0.72	9.08	NA	9.2	INMA	9.19
0.97	6.83	NA	9.78	INMA	9.62
1.27	7.58	8.71	9.48	INMA	8.79
1.04	6.49	8.74	8	INMA	8.86
0.76	6.38	8.99	8.97	INMA	8.94
1.04	10.35	9.19	8.18	INMA	9.31
1.23	7.04	9.69	8.98	INMA	9.71
1	7.96	9.05	9.52	INMA	9
0.76	7.37	8.94	NA	INMA	9.09
NA	9.17	9.56	8.56	INMA	9.58
1.04	7.03	8.9	8.86	INMA	9.07
1.38	8.21	NA	8.67	INMA	9.09
0.98	7.75	8.91	8.4	INMA	9.05
0.86	8.4	9.91	8.77	INMA	10.04
1.1	6.95	9.16	9.13	INMA	9.18
0.5	7.75	9.54	9.16	INMA	9.71
1.06	6.79	8.91	8.85	INMA	9.04
1.06	7.82	8.9	8.19	INMA	8.86
NA	7.35	9.87	7.79	INMA	9.71
1.17	7.92	NA	8.45	INMA	9.34
1.4	8.32	9.73	8.58	INMA	9.81
1.2	7.72	9.17	9.91	INMA	9.28
0.87	6.84	NA	8.62	INMA	8.74
0.87	7.86	9.46	8.8	INMA	9.59
1.46	7.39	9.31	8.65	INMA	9.32
1.06	7.86	8.62	9.05	INMA	8.82
0.94	8.34	9.68	9.44	INMA	9.69
1.2	8.85	9.34	7.8	INMA	9.38
1	8.8	9.11	8.03	INMA	9.13
0.83	8.68	8.96	9.42	INMA	8.96
0.96	7.77	9.38	8.31	INMA	9.41
0.91	8.62	NA	8.88	INMA	9.44
1.08	6.66	8.83	8.22	INMA	8.82
1.07	8	9.65	NA	INMA	9.65
0.88	7.72	8.6	8.88	INMA	8.6
NA	NA	9.32	NA	INMA	9.42
0.92	7.38	NA	8.37	INMA	9.65
1.05	7.65	9.64	9	INMA	9.61
0.7	7.2	NA	8.38	INMA	9.45
0.97	7.18	9.45	8.84	INMA	8.52
0.78	7.8	9.1	8.67	INMA	9.26
1.17	6.78	8.87	8.39	INMA	8.78
0.84	7.75	NA	9.35	INMA	9.46
0.69	6.67	NA	8.73	INMA	9.56
0.83	7.33	9.54	9.3	INMA	9.62
1	7.32	9.33	8.53	INMA	9.25
1.22	6.31	9.46	9.07	INMA	9.61
1.18	7.09	8.5	8.92	INMA	8.71
0.99	7.33	8.77	8.82	INMA	8.78
1.04	8.88	8.89	8.25	INMA	8.85
0.96	6.65	NA	8.62	INMA	8.62
1	6.68	9.35	8.6	INMA	9.48
1.12	7.64	8.58	9.81	INMA	8.62
0.89	7.73	8.63	7.88	INMA	8.59
0.91	6.8	9.18	NA	INMA	9.22
0.92	7.34	8.75	8.52	INMA	9.52
1	7.3	8.55	6.79	INMA	8.67
0.92	7.49	NA	8.84	INMA	9.44
1.14	6.89	9.15	9.83	INMA	9.28
1.21	7.4	8.42	8.3	INMA	8.55
0.63	8.25	9.16	8.47	INMA	9.08
1.02	7.12	9.17	8.95	INMA	9.26
NA	NA	9.05	8.82	INMA	8.99
0.95	6.57	8.96	9.19	INMA	8.89
0.97	6.76	9.23	9.15	INMA	9.3
0.65	6.39	9.39	9.33	INMA	9.44
1.38	8.01	NA	9	INMA	9.52
0.88	8.06	8.54	8.99	INMA	9.52
0.76	9.31	9.91	8.87	INMA	10.08
0.89	6.5	9.59	9.37	INMA	9.51
0.85	7.63	9.29	8.63	INMA	9.34
1.25	6.47	9.2	9.05	INMA	9.38
1	5.39	8.55	8.55	INMA	8.51
0.7	7.46	NA	7.85	INMA	8.51
0.68	9.38	NA	8.27	INMA	9.11
0.92	7.12	9.24	9.03	INMA	9.28
1.27	6.81	8.73	NA	INMA	8.82
0.8	7.95	9.09	8.1	INMA	9.1
0.92	6.94	9.26	8.64	INMA	9.09
0.83	8.88	10.22	8.97	INMA	10.22
0.96	9.11	9.17	8	INMA	9.3
1	6.59	9.09	NA	INMA	9.04
1.04	6.26	8.21	7.75	INMA	8.24
1.05	7.36	9.28	8.07	INMA	9.19
0.78	7.62	9.96	8.64	INMA	9.75
0.86	8.87	9.44	7.97	INMA	9.33
0.84	7.15	8.56	9.37	INMA	8.43
1.12	8.62	9.47	9.79	INMA	9.34
0.88	7.35	9.03	8.44	INMA	8.97
0.95	8.89	9.08	7.86	INMA	8.99
1.08	7.88	9.06	8.32	INMA	8.99
1.01	5.84	9.33	9.2	INMA	9.31
1.31	7.76	NA	9.22	INMA	8.54
0.88	7.86	8.27	8.93	INMA	8.48
0.95	6.48	8.67	9.38	INMA	8.77
0.81	6.8	8.16	NA	INMA	8.2
0.87	6.97	8.78	NA	INMA	8.79
NA	NA	8.59	9.32	INMA	8.59
0.81	6.07	8.84	NA	INMA	8.88
1.29	6.29	9.03	8.31	INMA	9.07
0.77	7.09	9.24	7.95	INMA	8.99
1.18	6.02	8.69	8.64	INMA	8.76
0.87	6.4	NA	NA	INMA	8.79
0.91	7.24	8.89	8.87	INMA	8.88
0.87	6.91	8.77	8.37	INMA	8.77
NA	6.19	8.55	9.65	INMA	8.64
0.76	7.19	8.94	8.82	INMA	8.92
1.07	7.11	8.83	NA	INMA	8.64
0.98	7.12	8.97	NA	INMA	8.95
1.23	8.13	8.44	8.72	INMA	8.28
1.15	7.96	NA	7.88	INMA	8.81
1.21	7.22	8.27	NA	INMA	8.32
1.34	8.03	8.95	8.7	INMA	9.08
1.07	6.36	8.87	NA	INMA	8.9
1.14	8.97	8.86	7.85	INMA	8.86
1.11	6.16	8.63	NA	INMA	8.54
1	6.26	8.71	9.35	INMA	8.7
1.04	7.87	8.9	8.75	INMA	8.85
1.06	5.8	8.01	7.16	INMA	8.05
0.85	7.27	8.95	9.75	INMA	8.81
0.97	6.38	8.53	9.16	INMA	8.55
0.84	7.14	8.55	9.34	INMA	8.63
0.92	6.88	8.56	8.66	INMA	8.42
1.09	6.99	9.05	9.65	INMA	8.83
NA	NA	8.41	NA	INMA	8.38
1.11	6.23	8.55	8.42	INMA	8.64
1.02	6.82	8.18	8.76	INMA	8.14
0.84	5.65	8.12	8.44	INMA	8.06
1.04	6.25	NA	8.9	INMA	8.6
0.95	5.9	NA	8.79	INMA	7.94
0.65	6.44	8.02	8.3	INMA	7.9
1.38	6.75	8.78	8.87	INMA	8.78
0.86	7.38	8.61	8.37	INMA	8.69
1.08	6.53	NA	8.34	INMA	8.09
0.75	5.92	7.92	8.18	INMA	7.8
0.82	7.04	NA	7.88	INMA	8.68
1.41	6.51	8.67	NA	INMA	8.78
NA	NA	8.89	9.09	INMA	9
1.17	7.82	8.12	8.11	INMA	8.04
1.09	6.77	NA	8.13	INMA	8.71
1.31	7.51	8.5	8.73	INMA	8.61
0.89	5.97	7.82	7.87	INMA	7.98
0.92	6.06	NA	8.81	INMA	9.25
0.77	6.21	8.03	7.8	INMA	8.03
0.87	5.97	8.26	9.23	INMA	8.04
1.23	6.5	NA	NA	INMA	8.45
1.04	6.68	8.13	7.97	INMA	8.14
0.85	7.66	8.62	9.05	INMA	8.65
1.34	6.71	NA	7.79	INMA	8.59
0.8	6.92	8.51	8.73	INMA	8.63
0.61	7.43	NA	9.21	INMA	8.49
0.74	5.81	7.97	8.37	INMA	7.79
1.16	6.5	8.67	8.53	INMA	8.59
0.78	7.38	8.68	9.32	INMA	8.62
0.75	7.76	NA	8.86	INMA	8.05
1.37	8.41	8.69	8.64	INMA	8.66
1.07	7.82	9.45	NA	INMA	8.71
0.96	6.6	8.61	8.27	INMA	8.5
0.8	5.98	7.98	8.45	INMA	8.04
1.27	7.31	8.29	7.67	INMA	8.35
1.04	6.92	8.3	8.51	INMA	8.37
1.1	7.83	NA	9.48	INMA	8.16
1.32	7.73	8.53	8.06	INMA	8.49
0.99	5.93	NA	7.37	INMA	8.43
0.84	6.49	7.65	8.52	INMA	7.59
0.85	8.27	NA	8.31	INMA	8.5
1.07	7.83	9.04	9.03	INMA	9.04
1.01	7.45	NA	8.01	INMA	8.42
0.93	6.71	NA	8.24	INMA	8.33
1.12	7.02	8.52	7.95	INMA	8.42
0.88	7.44	8.87	9.14	INMA	8.93
1.11	6	8.72	9.28	INMA	8.57
0.98	7.7	8.64	9.22	INMA	8.28
1.32	6.85	8.42	8.64	INMA	8.44
1.43	6.96	8.17	9.49	INMA	8.13
1.03	6.17	8.18	8.16	INMA	8.3
0.99	7.82	NA	9.06	INMA	8.15
0.94	6.52	8.63	8.7	INMA	8.56
0.93	6.84	8.23	8.42	INMA	8.21
0.99	6.15	NA	9.03	INMA	8.21
0.95	6.31	8.56	8.28	INMA	8.36
1.11	7.22	8.4	9.03	INMA	8.36
0.97	6.99	8.75	8.54	INMA	8.4
0.85	6.93	NA	7.92	INMA	7.67
0.76	8.89	9.07	9.19	INMA	9.17
1.2	6.55	7.76	NA	INMA	7.71
0.86	6.58	7.71	7.36	INMA	7.56
0.81	9.78	8.33	8.15	INMA	8.19
0.76	6.94	8.27	7.38	INMA	8.23
0.91	7.19	8.75	9.21	INMA	8.85
0.9	6.19	8.18	7.94	INMA	8.23
1.14	5.8	7.9	7.9	INMA	7.92
1.27	6.26	8.31	8.45	INMA	8.19
0.92	7.35	8.3	8.57	INMA	8.19
0.85	5.27	NA	8.71	INMA	7.3
1.21	7.41	8.38	9.44	INMA	8.2
0.88	6.48	9.77	9.48	INMA	10.04
NA	NA	8.13	8.66	INMA	8.29
0.86	6.74	NA	7.53	INMA	8.08
1.22	6.24	8.26	8.33	INMA	8.17
0.84	6.24	8.4	8.41	INMA	8.19
1.41	7.75	8.36	9.13	INMA	8.12
0.91	6.11	8.34	8.07	INMA	8.19
0.99	6.07	8.4	8.25	INMA	8.26
1.03	4.38	NA	8.52	INMA	8.02
0.93	7.2	8.8	7.67	INMA	8.98
0.99	6.05	8.72	8.38	INMA	8.87
0.93	8.32	9.06	8.93	INMA	9.08
0.81	6.24	8.95	9.13	INMA	9.05
1.04	7.48	8.84	9.31	INMA	8.93
0.79	8	8.94	8.2	INMA	9.11
NA	NA	9.72	NA	INMA	9.65
NA	NA	8.76	9.28	INMA	8.86
1.05	6.88	8.88	8.25	INMA	9.12
0.84	10.31	9.81	NA	INMA	9.96
0.59	6.94	8.83	9.2	INMA	8.96
0.93	8.7	9.59	8.73	INMA	9.66
0.95	7.48	9.62	9.08	INMA	9.67
