# Supplementary material for: Associations of four biological age markers with child development: A multi-omic analysis in the European HELIX cohort
Source: eLife. 2023 Jun 6;12:e85104. doi: 10.7554/eLife.85104 (PMC10338035; doi:10.7554/eLife.85104)
Supplement: Supplementary file 1. [file elife-85104-supp1.xlsx]

## Sheet: Sheet1
Supplementary file 1 . Number of samples and features before and after the quality control process
Quality control at the sample level
	Telomere length	Methylation	Transcriptomics	Proteomics	Urinary metabolomics	Sera metabolomics
Initial number of subjects	1185	1200	1165	1194	1212	1209
Initial number samples	1340	1376	1293	1348	1366	1364
Samples with sucessful RNA/DNA extraction	1340	1355	1151	-	-	-
Number of samples excluded during QC	Intial QC: None	Initial QC: 1	Lab QC: 10	> = 10 proteins <LOD or >LOQ2: 20	-	QC: Hemolysed sample: 1
	-	Call rate<98%: 1	Sex: 4	Not HELIX or not ethic consent: 4	-	-
	-	Sex: 2	-	-	-	-
	-	Not same sample (SNPs): 4	-	-	-	-
	-	Duplicates: 21	-	-	-	-
Final number of samples (paired)	1340 (150)	1326 (148)	1137 (105)	1324 (149)	1366 (153)	1363 (154)
Final number of subjects	1185	1173	1010	1170	1212	1208
Final number subjects matched to HELIX clinical database for analysis*	1162	1173	1007	1152
Quality control at the feature level
	Telomere length	Methylation	Transcriptomics	Proteomics	Urinary metabolomics	Sera metabolomics
Initial number of features	1	485512	67528	43	128K data points	188
Criteria for inclusion	-	-	-	-	High abundance, limited overlap	-
Criteria for exclusion	-	probes with low call rate, probes for SNPs, non-CpG probes, control probes	control probes, probes not annotated to a chr, and probes in sexual chr. probes with call rate <1%	Duplicated. <30% of measurements in the linear range	Feature not annotated to metabolite or redundant spectral feature	LOD<30% and CV<30%
Final number of features	1	480071	58254	36	44	177
Annotation file	-	Illumina v1.2 annotation	HTA-2_0 Transcript Cluster Annotations Release na36, formated by Carles	Luminex + manual annotation	CHEBI for all	CHEBI for all
Genome reference	-	hg19	hg19	-	-	-
Final number of features annotated to genes	-	362979	32033	36	-	KEGG id for 36 (mainly amino acids and amines)
*Additional children not part of the HELIX subcohort included in some molecular analyses
