# Supplementary material for: Associations of four biological age markers with child development: A multi-omic analysis in the European HELIX cohort
Source: eLife. 2023 Jun 6;12:e85104. doi: 10.7554/eLife.85104 (PMC10338035; doi:10.7554/eLife.85104)
Supplement: Supplementary file 2. [file elife-85104-supp2.xlsx]

## Sheet: Sheet1
Supplementary file 2: Proportion of covariates missing for each biological age marker
Variable	Telomere length (Total N =1162)	DNA methylation age (Total N =1173)	Transcriptome age (Total N = 1007)	Immunometabolic age (Total N = 1152)
age	0	0	0	0
sex	0	0	0	0
cohort	0	0	0	0
ethnicity	0	0	0	0
birthweight	0.01	0.01	0.01	0.01
gestational age	0.01	0.01	0.01	0.01
maternal smoke exposure	0	0	0	0
child passive smoke exposure	0.02	0.02	0.02	0.02
maternal eduation	0.03	0.03	0.04	0.03
family affluence	0	0	0	0
family social capital	0.07	0.07	0.08	0.08
physical activity	0.03	0.03	0.02	0.03
KIDMED score	0	0	0	0
Height z-score	0	0	0	0
BMI z-score	0	0	0	0
Adiposity (BIA fat-mass %)	0.01	0.01	0.01	0.01
Working memory (3-back d')*	0.24	0.24	0.22	0.24
Inattentiveness (ANT-HRT)	0.02	0.02	0.01	0.01
Fluid Intelligence (CPM)	0.01	0.01	0.01	0
Internalizing Behaviours (CBCL)	0.01	0.01	0	0.01
Externalizing behaviours (CBCL)	0.01	0.01	0	0.01
Lung Function (FEV1)	0.22	0.21	0.21	0.21
Puberty development score**	0.54	0.54	0.49	0.53
NK	0	0	0.09	0.03
Bcell	0	0	0.09	0.03
CD4T	0	0	0.09	0.03
CD8T	0	0	0.09	0.03
Mono	0	0	0.09	0.03
Eos	0	0	0.09	0.03
Neu	0	0	0.09	0.03
* Not available in the Lithuanian KANC cohort
** Only assessed in children over 8 years old
