# Supplementary material for: Associations of four biological age markers with child development: A multi-omic analysis in the European HELIX cohort
Source: eLife. 2023 Jun 6;12:e85104. doi: 10.7554/eLife.85104 (PMC10338035; doi:10.7554/eLife.85104)
Supplement: Supplementary file 3. [file elife-85104-supp3.xlsx]

## Sheet: Sheet1
Supplementary file 3: Immunometabolic age clock coefficients
Row	Name	platform	coefficient	absolute coef
1	(Intercept)	NA	7.88533	7.88533
202	SM..OH..C22.1	Metabolite Plasma	-0.266498	0.266498
201	SM..OH..C16.1	Metabolite Plasma	0.255179	0.255179
117	Met.SO	Metabolite Plasma	-0.241692	0.241692
218	Thr	Metabolite Plasma	0.217482	0.217482
94	Glu	Metabolite Plasma	-0.197252	0.197252
28	Pantothenic.acid	Metabolite urine	-0.190043	0.190043
198	Ser	Metabolite Plasma	-0.183265	0.183265
2	Creatinine.x	Metabolite urine	0.182743	0.182743
92	Creatinine.y	Metabolite Plasma	0.169846	0.169846
249	EGF	Protein Plasma	-0.159866	0.159866
237	PAI1	Protein Plasma	-0.148137	0.148137
58	C12.1	Metabolite Plasma	-0.141645	0.141645
211	SM.C24.1	Metabolite Plasma	0.132789	0.132789
90	C9	Metabolite Plasma	-0.12959	0.12959
137	PC.aa.C36.6	Metabolite Plasma	0.122202	0.122202
233	INSULIN	Protein Plasma	0.121525	0.121525
164	PC.ae.C34.3	Metabolite Plasma	-0.121044	0.121044
140	PC.aa.C38.3	Metabolite Plasma	0.120561	0.120561
240	GCSF	Protein Plasma	0.119852	0.119852
219	total.DMA	Metabolite Plasma	-0.117721	0.117721
154	PC.aa.C42.5	Metabolite Plasma	-0.115313	0.115313
251	IFNgamma	Protein Plasma	0.115219	0.115219
25	Creatine	Metabolite urine	-0.11052	0.11052
129	PC.aa.C34.3	Metabolite Plasma	-0.105898	0.105898
80	C5	Metabolite Plasma	0.099946	0.099946
220	Trp	Metabolite Plasma	-0.0979224	0.0979224
209	SM.C20.2	Metabolite Plasma	-0.0968345	0.0968345
8	X4.deoxythreonic.acid	Metabolite urine	0.0893884	0.0893884
230	MCP1	Protein Plasma	-0.0850847	0.0850847
174	PC.ae.C38.3	Metabolite Plasma	0.0848295	0.0848295
136	PC.aa.C36.5	Metabolite Plasma	-0.0843288	0.0843288
228	IL1beta	Protein Plasma	0.0776648	0.0776648
131	PC.aa.C36.0	Metabolite Plasma	0.0774379	0.0774379
226	APO.B	Protein Plasma	-0.0750037	0.0750037
206	SM.C16.1	Metabolite Plasma	0.0733716	0.0733716
225	APO.A1	Protein Plasma	0.07208	0.07208
204	SM..OH..C24.1	Metabolite Plasma	-0.0707073	0.0707073
186	PC.ae.C42.2	Metabolite Plasma	-0.0701281	0.0701281
123	PC.aa.C32.0	Metabolite Plasma	-0.0694175	0.0694175
178	PC.ae.C40.1	Metabolite Plasma	0.0689472	0.0689472
56	C10.2	Metabolite Plasma	0.0660297	0.0660297
17	Citrate	Metabolite urine	0.0635595	0.0635595
157	PC.ae.C30.1	Metabolite Plasma	0.0623386	0.0623386
161	PC.ae.C34.0	Metabolite Plasma	0.0622144	0.0622144
155	PC.aa.C42.6	Metabolite Plasma	-0.0616307	0.0616307
191	PC.ae.C44.4	Metabolite Plasma	0.0613308	0.0613308
24	Glycine	Metabolite urine	0.0611518	0.0611518
23	Taurine.x	Metabolite urine	0.0582482	0.0582482
20	Carnitine	Metabolite urine	0.0574883	0.0574883
101	Lys	Metabolite Plasma	0.057254	0.057254
238	IL8	Protein Plasma	-0.0531869	0.0531869
144	PC.aa.C40.1	Metabolite Plasma	-0.0521209	0.0521209
170	PC.ae.C36.5	Metabolite Plasma	0.0515718	0.0515718
45	N1.methyl.nicotinamide	Metabolite urine	-0.051084	0.051084
53	C0	Metabolite Plasma	0.05095	0.05095
21	Trimethylamine.oxide	Metabolite urine	0.0497517	0.0497517
149	PC.aa.C40.6	Metabolite Plasma	0.0483898	0.0483898
55	C10.1	Metabolite Plasma	-0.0483272	0.0483272
235	BAFF	Protein Plasma	-0.0475771	0.0475771
194	Phe	Metabolite Plasma	-0.0475375	0.0475375
214	Spermidine	Metabolite Plasma	0.0473985	0.0473985
48	Ala	Metabolite Plasma	-0.0473239	0.0473239
83	C5.DC..C6.OH.	Metabolite Plasma	0.0457228	0.0457228
130	PC.aa.C34.4	Metabolite Plasma	0.045089	0.045089
30	X3.hydroxyisovalerate	Metabolite urine	0.0445596	0.0445596
217	Taurine.y	Metabolite Plasma	-0.0438596	0.0438596
78	C4	Metabolite Plasma	-0.0412436	0.0412436
116	Met	Metabolite Plasma	0.041138	0.041138
152	PC.aa.C42.2	Metabolite Plasma	0.0400182	0.0400182
258	IL4	Protein Plasma	-0.039904	0.039904
22	Scyllo.inositol	Metabolite urine	0.0386736	0.0386736
227	APO.E	Protein Plasma	-0.0384696	0.0384696
127	PC.aa.C34.1	Metabolite Plasma	-0.0378977	0.0378977
91	Cit	Metabolite Plasma	-0.0377187	0.0377187
5	Valine	Metabolite urine	-0.0359245	0.0359245
74	C2	Metabolite Plasma	-0.0355302	0.0355302
98	Ile	Metabolite Plasma	-0.0354421	0.0354421
50	Arg	Metabolite Plasma	0.0352118	0.0352118
27	Formate	Metabolite urine	-0.0348373	0.0348373
229	IL6	Protein Plasma	0.0340406	0.0340406
234	TNFalfa	Protein Plasma	-0.0337269	0.0337269
40	p.hydroxyphenylacetate	Metabolite urine	0.0334918	0.0334918
6	X3.hydroxyisobutyrate	Metabolite urine	0.0334559	0.0334559
187	PC.ae.C42.3	Metabolite Plasma	-0.0329461	0.0329461
96	H1	Metabolite Plasma	0.0307571	0.0307571
86	C6..C4.1.DC.	Metabolite Plasma	0.0307196	0.0307196
250	IL5	Protein Plasma	-0.0300355	0.0300355
36	Glucose	Metabolite urine	-0.0275608	0.0275608
11	Alanine	Metabolite urine	-0.0273679	0.0273679
3	Leucine	Metabolite urine	0.0263653	0.0263653
37	Sucrose	Metabolite urine	-0.0261803	0.0261803
57	C12	Metabolite Plasma	-0.0244267	0.0244267
69	C16.2.OH	Metabolite Plasma	-0.022797	0.022797
76	C3.DC..C4.OH.	Metabolite Plasma	-0.0217392	0.0217392
44	N.methylnicotinic.acid	Metabolite urine	-0.0212057	0.0212057
73	C18.2	Metabolite Plasma	0.0211219	0.0211219
49	alpha.AAA	Metabolite Plasma	0.0211001	0.0211001
255	IP10	Protein Plasma	0.0198922	0.0198922
236	Cpeptide	Protein Plasma	0.0197331	0.0197331
223	Adiponectin	Protein Plasma	0.0195812	0.0195812
197	SDMA	Metabolite Plasma	0.019354	0.019354
33	X5.oxoproline	Metabolite urine	-0.017583	0.017583
85	C5.OH..C3.DC.M.	Metabolite Plasma	0.0170744	0.0170744
70	C16.OH	Metabolite Plasma	0.0169877	0.0169877
31	N.acetyl.neuraminic.acid	Metabolite urine	-0.0166101	0.0166101
102	lysoPC.a.C14.0	Metabolite Plasma	-0.0158157	0.0158157
95	Gly	Metabolite Plasma	-0.0155131	0.0155131
4	Isoleucine	Metabolite urine	-0.014788	0.014788
59	C12.DC	Metabolite Plasma	0.0142749	0.0142749
47	ADMA	Metabolite Plasma	-0.0134409	0.0134409
38	Urea	Metabolite urine	-0.0131565	0.0131565
93	Gln	Metabolite Plasma	0.0128926	0.0128926
19	Trimethylamine	Metabolite urine	-0.0128828	0.0128828
52	Asp	Metabolite Plasma	-0.0128586	0.0128586
35	Proline.betaine	Metabolite urine	0.0121329	0.0121329
39	N.methyl.2.pyridone.5.carboxamide	Metabolite urine	-0.0107019	0.0107019
139	PC.aa.C38.1	Metabolite Plasma	0.0101426	0.0101426
125	PC.aa.C32.2	Metabolite Plasma	0.00984088	0.00984088
77	C3.OH	Metabolite Plasma	-0.00957027	0.00957027
41	Tyrosine	Metabolite urine	-0.00913272	0.00913272
81	C5.1	Metabolite Plasma	-0.00836568	0.00836568
34	X3.aminoisobutyrate	Metabolite urine	-0.00784055	0.00784055
42	X3.Indoxylsulfate	Metabolite urine	-0.00750623	0.00750623
215	Spermine	Metabolite Plasma	0.00745344	0.00745344
43	N.methylpicolinic.acid	Metabolite urine	-0.00585733	0.00585733
239	FGFBasic	Protein Plasma	0.0056593	0.0056593
7	X4.deoxyerythronic.acid	Metabolite urine	0.00364107	0.00364107
192	PC.ae.C44.5	Metabolite Plasma	0.00327571	0.00327571
26	Hippurate	Metabolite urine	-0.00321554	0.00321554
9	Lactate	Metabolite urine	0.00288348	0.00288348
196	Putrescine	Metabolite Plasma	0.00202673	0.00202673
199	Serotonin	Metabolite Plasma	-0.00146933	0.00146933
14	p.cresol.sulfate	Metabolite urine	0.000517428	0.000517428
82	C5.1.DC	Metabolite Plasma	0.000345132	0.000345132
168	PC.ae.C36.3	Metabolite Plasma	-8.15025e-05	8.15025e-05
46	Ac.Orn	Metabolite Plasma	0	0
51	Asn	Metabolite Plasma	0	0
54	C10	Metabolite Plasma	0	0
60	C14	Metabolite Plasma	0	0
61	C14.1	Metabolite Plasma	0	0
62	C14.1.OH	Metabolite Plasma	0	0
63	C14.2	Metabolite Plasma	0	0
64	C14.2.OH	Metabolite Plasma	0	0
65	C16	Metabolite Plasma	0	0
66	C16.1	Metabolite Plasma	0	0
67	C16.1.OH	Metabolite Plasma	0	0
68	C16.2	Metabolite Plasma	0	0
71	C18	Metabolite Plasma	0	0
72	C18.1	Metabolite Plasma	0	0
75	C3	Metabolite Plasma	0	0
79	C4.1	Metabolite Plasma	0	0
84	C5.M.DC	Metabolite Plasma	0	0
87	C6.1	Metabolite Plasma	0	0
88	C7.DC	Metabolite Plasma	0	0
89	C8	Metabolite Plasma	0	0
97	His	Metabolite Plasma	0	0
99	Kynurenine	Metabolite Plasma	0	0
100	Leu	Metabolite Plasma	0	0
103	lysoPC.a.C16.0	Metabolite Plasma	0	0
104	lysoPC.a.C16.1	Metabolite Plasma	0	0
105	lysoPC.a.C17.0	Metabolite Plasma	0	0
106	lysoPC.a.C18.0	Metabolite Plasma	0	0
107	lysoPC.a.C18.1	Metabolite Plasma	0	0
108	lysoPC.a.C18.2	Metabolite Plasma	0	0
109	lysoPC.a.C20.3	Metabolite Plasma	0	0
110	lysoPC.a.C20.4	Metabolite Plasma	0	0
111	lysoPC.a.C24.0	Metabolite Plasma	0	0
112	lysoPC.a.C26.0	Metabolite Plasma	0	0
113	lysoPC.a.C26.1	Metabolite Plasma	0	0
114	lysoPC.a.C28.0	Metabolite Plasma	0	0
115	lysoPC.a.C28.1	Metabolite Plasma	0	0
118	Orn	Metabolite Plasma	0	0
119	PC.aa.C24.0	Metabolite Plasma	0	0
120	PC.aa.C28.1	Metabolite Plasma	0	0
121	PC.aa.C30.0	Metabolite Plasma	0	0
122	PC.aa.C30.2	Metabolite Plasma	0	0
124	PC.aa.C32.1	Metabolite Plasma	0	0
126	PC.aa.C32.3	Metabolite Plasma	0	0
128	PC.aa.C34.2	Metabolite Plasma	0	0
132	PC.aa.C36.1	Metabolite Plasma	0	0
133	PC.aa.C36.2	Metabolite Plasma	0	0
134	PC.aa.C36.3	Metabolite Plasma	0	0
135	PC.aa.C36.4	Metabolite Plasma	0	0
138	PC.aa.C38.0	Metabolite Plasma	0	0
141	PC.aa.C38.4	Metabolite Plasma	0	0
142	PC.aa.C38.5	Metabolite Plasma	0	0
143	PC.aa.C38.6	Metabolite Plasma	0	0
145	PC.aa.C40.2	Metabolite Plasma	0	0
146	PC.aa.C40.3	Metabolite Plasma	0	0
147	PC.aa.C40.4	Metabolite Plasma	0	0
148	PC.aa.C40.5	Metabolite Plasma	0	0
150	PC.aa.C42.0	Metabolite Plasma	0	0
151	PC.aa.C42.1	Metabolite Plasma	0	0
153	PC.aa.C42.4	Metabolite Plasma	0	0
156	PC.ae.C30.0	Metabolite Plasma	0	0
158	PC.ae.C30.2	Metabolite Plasma	0	0
159	PC.ae.C32.1	Metabolite Plasma	0	0
160	PC.ae.C32.2	Metabolite Plasma	0	0
162	PC.ae.C34.1	Metabolite Plasma	0	0
163	PC.ae.C34.2	Metabolite Plasma	0	0
165	PC.ae.C36.0	Metabolite Plasma	0	0
166	PC.ae.C36.1	Metabolite Plasma	0	0
167	PC.ae.C36.2	Metabolite Plasma	0	0
169	PC.ae.C36.4	Metabolite Plasma	0	0
171	PC.ae.C38.0	Metabolite Plasma	0	0
172	PC.ae.C38.1	Metabolite Plasma	0	0
173	PC.ae.C38.2	Metabolite Plasma	0	0
175	PC.ae.C38.4	Metabolite Plasma	0	0
176	PC.ae.C38.5	Metabolite Plasma	0	0
177	PC.ae.C38.6	Metabolite Plasma	0	0
179	PC.ae.C40.2	Metabolite Plasma	0	0
180	PC.ae.C40.3	Metabolite Plasma	0	0
181	PC.ae.C40.4	Metabolite Plasma	0	0
182	PC.ae.C40.5	Metabolite Plasma	0	0
183	PC.ae.C40.6	Metabolite Plasma	0	0
184	PC.ae.C42.0	Metabolite Plasma	0	0
185	PC.ae.C42.1	Metabolite Plasma	0	0
188	PC.ae.C42.4	Metabolite Plasma	0	0
189	PC.ae.C42.5	Metabolite Plasma	0	0
190	PC.ae.C44.3	Metabolite Plasma	0	0
193	PC.ae.C44.6	Metabolite Plasma	0	0
195	Pro	Metabolite Plasma	0	0
200	SM..OH..C14.1	Metabolite Plasma	0	0
203	SM..OH..C22.2	Metabolite Plasma	0	0
205	SM.C16.0	Metabolite Plasma	0	0
207	SM.C18.0	Metabolite Plasma	0	0
208	SM.C18.1	Metabolite Plasma	0	0
210	SM.C24.0	Metabolite Plasma	0	0
212	SM.C26.0	Metabolite Plasma	0	0
213	SM.C26.1	Metabolite Plasma	0	0
216	t4.OH.Pro	Metabolite Plasma	0	0
221	Tyr	Metabolite Plasma	0	0
222	Val	Metabolite Plasma	0	0
10	X2.hydroxyisobutyrate	Metabolite urine	0	0
12	Lysine	Metabolite urine	0	0
13	Acetate	Metabolite urine	0	0
15	Succinate	Metabolite urine	0	0
16	Glutamine	Metabolite urine	0	0
18	Dimethylamine	Metabolite urine	0	0
29	X3.hydroxybutyrate.3.aminoisobutyrate	Metabolite urine	0	0
32	Acetone	Metabolite urine	0	0
224	CRP	Protein Plasma	0	0
231	Leptin	Protein Plasma	0	0
232	HGF	Protein Plasma	0	0
241	IL10	Protein Plasma	0	0
242	IL13	Protein Plasma	0	0
243	IL12	Protein Plasma	0	0
244	Eotaxin	Protein Plasma	0	0
245	IL17	Protein Plasma	0	0
246	MIP1alfa	Protein Plasma	0	0
247	MIP1beta	Protein Plasma	0	0
248	IL15	Protein Plasma	0	0
252	IFNalfa	Protein Plasma	0	0
253	IL1RA	Protein Plasma	0	0
254	IL2	Protein Plasma	0	0
256	IL2R	Protein Plasma	0	0
257	MIG	Protein Plasma	0	0
