# Supplementary material for: Associations of four biological age markers with child development: A multi-omic analysis in the European HELIX cohort
Source: eLife. 2023 Jun 6;12:e85104. doi: 10.7554/eLife.85104 (PMC10338035; doi:10.7554/eLife.85104)
Supplement: Supplementary file 4. [file elife-85104-supp4.xlsx]

## Sheet: Sheet1
Supplementary file 4 : Trancriptome age clock coefficients
Annotation information															model coeficients
EntrezeGeneID_Affy	transcript_cluster_id	probeset_id	seqname	strand	start	stop	total_probes	TC_size	TSS_Affy	GeneSymbol_Affy	GeneSymbolDB	GeneSymbolDB2	mrna_ID	mrna_DB
	TC02004597.hg.1	TC02004597.hg.1	chr2	-	133043368	133051950	30	8582	133051950		NA	NA	TCONS_00003407	NONCODE	-0.00128955
	TC01000250.hg.1	TC01000250.hg.1	chr1	+	19934574	19935119	30	545	19934574		NA	NA	uc021ohx.1	UCSCGenes	-0.00210765
	TC01000327.hg.1	TC01000327.hg.1	chr1	+	26186104	26189911	30	3807	26186104		;		ENST00000455431;OTTHUMT00000019313	ENSEMBL;Havanatranscript	0.00554907
	TC01000432.hg.1	TC01000432.hg.1	chr1	+	33105552	33105653	30	101	33105552				ENST00000363721	ENSEMBL	0.0137268
	TC01000602.hg.1	TC01000602.hg.1	chr1	+	48154135	48169055	30	14920	48154135		;		ENST00000454285;OTTHUMT00000021838	ENSEMBL;NONCODE	0.0104234
	TC01000650.hg.1	TC01000650.hg.1	chr1	+	53580248	53584281	30	4033	53580248		;AX748428;	AX748428	ENST00000439621;AX748428;OTTHUMT00000024709;uc001cva.1	ENSEMBL;NONCODE;Havanatranscript;UCSCGenes	-0.0100356
	TC01000775.hg.1	TC01000775.hg.1	chr1	+	75648730	75648832	30	102	75648730		RNU6-622P	RNU6-622P	ENST00000384272	ENSEMBL	-0.00495935
	TC01000833.hg.1	TC01000833.hg.1	chr1	+	89488180	89515726	50	27546	89488180		NA	NA	ENST00000498904	ENSEMBL	-0.00681723
	TC01000954.hg.1	TC01000954.hg.1	chr1	+	110370977	110414058	40	43081	110370977		;		ENST00000453347;OTTHUMT00000032165	ENSEMBL;NONCODE	-0.00526347
	TC01001140.hg.1	TC01001140.hg.1	chr1	+	148000805	148000878	30	73	148000805		TRNA_Asn	TRNA_Asn	uc021ovy.1	UCSCGenes	0.00238598
	TC01001332.hg.1	TC01001332.hg.1	chr1	+	157155178	157157195	17	2017	157155178		;		ENST00000457239;OTTHUMT00000099026	ENSEMBL;NONCODE	-0.00710362
	TC01001402.hg.1	TC01001402.hg.1	chr1	+	161500903	161500974	30	71	161500903		TRNA_Gly	TRNA_Gly	uc021pde.1	UCSCGenes	-0.00913685
	TC01001431.hg.1	TC01001431.hg.1	chr1	+	163355655	163355726	30	71	163355655				ENST00000516931	ENSEMBL	-0.000566299
	TC01001801.hg.1	TC01001801.hg.1	chr1	+	218205177	218207002	30	1825	218205177		;		ENST00000420347;OTTHUMT00000095285	ENSEMBL;NONCODE	-0.00901012
	TC01001824.hg.1	TC01001824.hg.1	chr1	+	221681901	221684321	30	2420	221681901		;		ENST00000440104;OTTHUMT00000090308	ENSEMBL;NONCODE	-0.0083564
	TC01001833.hg.1	TC01001833.hg.1	chr1	+	223317391	223318296	30	905	223317391		;		ENST00000435108;OTTHUMT00000092590	ENSEMBL;Havanatranscript	-0.0335513
	TC01002646.hg.1	TC01002646.hg.1	chr1	-	51660767	51700768	30	40001	51700768		;;		ENST00000366181;ENST00000366181;OTTHUMT00000022441	ENSEMBL;NONCODE;NONCODE	-0.00718627
	TC01002661.hg.1	TC01002661.hg.1	chr1	-	53270780	53270884	30	104	53270884		RNU6-969P	RNU6-969P	ENST00000383900	ENSEMBL	0.00100657
	TC01002663.hg.1	TC01002663.hg.1	chr1	-	53458868	53459251	30	383	53459251				ENST00000442174	ENSEMBL	-0.0120931
	TC03002060.hg.1	TC03002060.hg.1	chr3	-	183525552	183526729	30	1177	183526729		YEATS2-AS1;YEATS2-AS1	YEATS2-AS1	ENST00000425008;OTTHUMT00000346515	ENSEMBL;Havanatranscript	-0.00405907
	TC01003032.hg.1	TC01003032.hg.1	chr1	-	117504969	117505093	30	124	117505093		RNA5SP55;5S_rRNA	RNA5SP55;5S_rRNA	ENST00000516701;uc021osl.1	ENSEMBL;UCSCGenes	0.000656282
	TC01003106.hg.1	TC01003106.hg.1	chr1	-	145397864	145397935	30	71	145397935		TRNA_Gly	TRNA_Gly	uc021ouv.1	UCSCGenes	-0.0117268
	TC01003228.hg.1	TC01003228.hg.1	chr1	-	151500307	151500414	30	107	151500414				ENST00000517031	ENSEMBL	0.0288912
	TC01003323.hg.1	TC01003323.hg.1	chr1	-	155679889	155680354	17	465	155680354		;		ENST00000432858;OTTHUMT00000086041	ENSEMBL;Havanatranscript	-0.00361501
	TC01003432.hg.1	TC01003432.hg.1	chr1	-	161417375	161417446	30	71	161417446		TRNA_Gly	TRNA_Gly	uc021pcg.1	UCSCGenes	-0.0105867
	TC01003435.hg.1	TC01003435.hg.1	chr1	-	161424756	161424827	30	71	161424827		TRNA_Gly	TRNA_Gly	uc021pcl.1	UCSCGenes	-0.0106951
	TC01003438.hg.1	TC01003438.hg.1	chr1	-	161432166	161432237	30	71	161432237		TRNA_Gly	TRNA_Gly	uc021pcq.1	UCSCGenes	-0.0107855
	TC01003441.hg.1	TC01003441.hg.1	chr1	-	161439547	161439618	30	71	161439618		TRNA_Gly	TRNA_Gly	uc021pcv.1	UCSCGenes	-0.0109068
	TC01003512.hg.1	TC01003512.hg.1	chr1	-	171137243	171220933	30	83690	171220933		;		ENST00000455124;OTTHUMT00000086231	ENSEMBL;Havanatranscript	0.00476336
	TC01003583.hg.1	TC01003583.hg.1	chr1	-	179558712	179558760	25	48	179558760		DQ591798	DQ591798	DQ591798;DQ591798;uc001gne.2;uc001gne.3	NONCODE;GenBank;NONCODE;UCSCGenes	-0.00160068
	TC01003654.hg.1	TC01003654.hg.1	chr1	-	193653376	193657559	30	4183	193657559		;		ENST00000447056;OTTHUMT00000086757	ENSEMBL;NONCODE	-0.00616166
	TC01003780.hg.1	TC01003780.hg.1	chr1	-	208780445	208785537	30	5092	208785537				ENST00000438903;OTTHUMT00000088021	ENSEMBL;Havanatranscript	-0.00211993
	TC01004012.hg.1	TC01004012.hg.1	chr1	-	238488987	238489088	30	101	238489088		RNU6-725P	RNU6-725P	ENST00000516562	ENSEMBL	-0.00600339
	TC01004075.hg.1	TC01004075.hg.1	chr1	-	247770428	247770503	30	75	247770503		RNU6-691P	RNU6-691P	ENST00000516585	ENSEMBL	0.0436282
	TC01004105.hg.1	TC01004105.hg.1	chr1	+	439365	453948	60	14583	439365		NA	NA	TCONS_l2_00001929-XLOC_l2_000006;TCONS_l2_00001930-XLOC_l2_000006;TCONS_l2_00001931-XLOC_l2_000006	BroadTUCP;BroadTUCP;BroadTUCP	0.000181486
	TC01004147.hg.1	TC01004147.hg.1	chr1	+	2693739	2695364	26	1625	2693739		NA	NA	TCONS_00001923	NONCODE	0.00304647
	TC01004230.hg.1	TC01004230.hg.1	chr1	+	21742815	21743867	30	1052	21742815		NA	NA	TCONS_00000165	NONCODE	0.00228167
	TC01004254.hg.1	TC01004254.hg.1	chr1	+	26437656	26452026	50	14370	26437656		NA	NA	NR_026685;NR_026686	NONCODE;NONCODE	0.0185676
	TC01004286.hg.1	TC01004286.hg.1	chr1	+	31196182	31197911	30	1729	31196182		NA	NA	BC017506	NONCODE	0.00525631
	TC01004316.hg.1	TC01004316.hg.1	chr1	+	36530869	36537457	30	6588	36530869		NA	NA	linc_luo_967	NONCODE	0.0254442
	TC01004365.hg.1	TC01004365.hg.1	chr1	+	48056325	48058496	30	2171	48056325				OTTHUMT00000021843	NONCODE	0.00188941
	TC01004376.hg.1	TC01004376.hg.1	chr1	+	50772147	50773062	30	915	50772147		NA	NA	TCONS_00000934	NONCODE	0.0100645
	TC01004391.hg.1	TC01004391.hg.1	chr1	+	54654517	54659121	18	4604	54654517				OTTHUMT00000023024	NONCODE	-0.0090161
	TC01004407.hg.1	TC01004407.hg.1	chr1	+	56410760	56415792	30	5032	56410760		NA	NA	TCONS_00000207	NONCODE	-0.010721
	TC01004515.hg.1	TC01004515.hg.1	chr1	+	88928658	88931553	40	2895	88928658		NA	NA	TCONS_00001015;TCONS_00001016	NONCODE;NONCODE	-0.000945978
	TC01004588.hg.1	TC01004588.hg.1	chr1	+	107360861	107408733	78	47872	107360861		NA	NA	TCONS_l2_00000468-XLOC_l2_000339;TCONS_l2_00000469-XLOC_l2_000339;TCONS_l2_00000470-XLOC_l2_000339;TCONS_l2_00002120-XLOC_l2_000339	BroadTUCP;BroadTUCP;BroadTUCP;BroadTUCP	-0.00164315
	TC01004640.hg.1	TC01004640.hg.1	chr1	+	114550572	114606423	30	55851	114550572		NA	NA	OTTHUMT00000032873	NONCODE	-0.0075923
	TC01004675.hg.1	TC01004675.hg.1	chr1	+	121138614	121204983	90	66369	121138614		NA	NA	BC038299;TCONS_00000289-XLOC_000375;TCONS_00000290;TCONS_00001132-XLOC_000375;TCONS_00002147	NONCODE;RinnlincRNA;NONCODE;RinnlincRNA;NONCODE	0.00598473
	TC01004681.hg.1	TC01004681.hg.1	chr1	+	142840927	142861553	50	20626	142840927		DQ592442	DQ592442	TCONS_l2_00000554-XLOC_l2_000395;uc009whu.1	BroadTUCP;NONCODE	0.00609882
	TC04000667.hg.1	TC04000667.hg.1	chr4	+	135988388	136018813	59	30425	135988388		;;;;;		ENST00000508605;ENST00000509713;ENST00000514526;OTTHUMT00000364196;OTTHUMT00000364197;OTTHUMT00000364198	ENSEMBL;ENSEMBL;ENSEMBL;Havanatranscript;Havanatranscript;Havanatranscript	0.00624051
	TC01004920.hg.1	TC01004920.hg.1	chr1	+	192586696	192588179	30	1483	192586696				OTTHUMT00000086407	NONCODE	-9.72e-05
	TC01004976.hg.1	TC01004976.hg.1	chr1	+	206164084	206166270	30	2186	206164084		NA	NA	TCONS_00000373	NONCODE	-0.00166522
	TC01005024.hg.1	TC01005024.hg.1	chr1	+	216271800	216273625	30	1825	216271800				OTTHUMT00000095285	NONCODE	-0.0143616
	TC01005054.hg.1	TC01005054.hg.1	chr1	+	223316723	223321526	30	4803	223316723		NA	NA	TCONS_00001294	NONCODE	-0.0101063
	TC01005073.hg.1	TC01005073.hg.1	chr1	+	226409812	226410285	29	473	226409812		NA	NA	TCONS_00001313	NONCODE	-0.0163326
	TC01005086.hg.1	TC01005086.hg.1	chr1	+	228382416	228391302	30	8886	228382416		NA	NA	TCONS_l2_00000881-XLOC_l2_000657	BroadTUCP	-0.00898826
	TC01005093.hg.1	TC01005093.hg.1	chr1	+	229455027	229455445	22	418	229455027		NA	NA	TCONS_00001320	NONCODE	0.00213994
	TC01005163.hg.1	TC01005163.hg.1	chr1	+	247337101	247349239	76	12138	247337101		NA	NA	TCONS_l2_00000939-XLOC_l2_000706;TCONS_l2_00000940-XLOC_l2_000706;TCONS_l2_00000941-XLOC_l2_000706	BroadTUCP;BroadTUCP;BroadTUCP	0.0128518
	TC01005277.hg.1	TC01005277.hg.1	chr1	-	14548037	14550105	50	2068	14550105				OTTHUMT00000005696;TCONS_00000471	NONCODE;NONCODE	-0.01272
	TC01005279.hg.1	TC01005279.hg.1	chr1	-	14675450	14677518	30	2068	14677518		NA	NA	TCONS_00000472	NONCODE	-0.00777857
	TC01005288.hg.1	TC01005288.hg.1	chr1	-	16492722	16504053	30	11331	16504053		NA	NA	linc_luo_975	NONCODE	0.003271
	TC01005293.hg.1	TC01005293.hg.1	chr1	-	16973894	16975897	30	2003	16975897		NA	NA	ENST00000535991	NONCODE	0.00673202
	TC01005321.hg.1	TC01005321.hg.1	chr1	-	23404835	23406532	30	1697	23406532		NA	NA	AK094536	NONCODE	0.00611152
	TC01005399.hg.1	TC01005399.hg.1	chr1	-	35081180	35083207	30	2027	35083207		NA	NA	TCONS_00001451	NONCODE	-0.0169303
	TC01005499.hg.1	TC01005499.hg.1	chr1	-	54377676	54378843	25	1167	54378843		NA	NA	TCONS_00001498	NONCODE	-0.00754163
	TC01005551.hg.1	TC01005551.hg.1	chr1	-	71181616	71185972	30	4356	71185972		NA	NA	TCONS_00000546	NONCODE	0.0158413
	TC01005595.hg.1	TC01005595.hg.1	chr1	-	85618178	85619886	30	1708	85619886		NA	NA	BC064139	NONCODE	0.0297486
	TC01005624.hg.1	TC01005624.hg.1	chr1	-	90749055	90771617	24	22562	90771617				OTTHUMT00000027723	NONCODE	0.000339209
	TC01005655.hg.1	TC01005655.hg.1	chr1	-	98389797	98394621	30	4824	98394621		NA	NA	TCONS_00001602	NONCODE	0.00676922
	TC01005687.hg.1	TC01005687.hg.1	chr1	-	109621258	109627542	30	6284	109627542		NA	NA	TCONS_00001623	NONCODE	0.00673752
	TC01005812.hg.1	TC01005812.hg.1	chr1	-	150507528	150508415	30	887	150508415		NA	NA	TCONS_00001678	NONCODE	-0.00346904
	TC01005897.hg.1	TC01005897.hg.1	chr1	-	161653497	161655042	30	1545	161655042		NA	NA	uc001gbc.2	NONCODE	-0.00672722
	TC01005980.hg.1	TC01005980.hg.1	chr1	-	182031812	182038388	30	6576	182038388		NA	NA	TCONS_l2_00002726-XLOC_l2_001220	BroadTUCP	0.0255725
	TC01006256.hg.1	TC01006256.hg.1	chr1	-	247337904	247338870	30	966	247338870		BC043220	BC043220	uc001icl.1	NONCODE	-0.00596202
	TC02000508.hg.1	TC02000508.hg.1	chr2	+	85594708	85594809	30	101	85594708				ENST00000365512	ENSEMBL	0.00994866
	TC02000598.hg.1	TC02000598.hg.1	chr2	+	98963458	98967603	30	4145	98963458		;		ENST00000413274;OTTHUMT00000329565	ENSEMBL;Havanatranscript	0.00268251
	TC02000610.hg.1	TC02000610.hg.1	chr2	+	101223490	101225820	40	2330	101223490		;;;		ENST00000414647;ENST00000424342;OTTHUMT00000329774;OTTHUMT00000329775	ENSEMBL;ENSEMBL;NONCODE;NONCODE	-0.00283565
	TC02000747.hg.1	TC02000747.hg.1	chr2	+	118771750	118773249	30	1499	118771750		NA	NA	OTTHUMT00000129631	Havanatranscript	0.0155236
	TC02000818.hg.1	TC02000818.hg.1	chr2	+	131422746	131422774	5	28	131422746		DQ600793	DQ600793	DQ600793;DQ600793;uc021vos.1	NONCODE;GenBank;UCSCGenes	-0.00203501
	TC02000832.hg.1	TC02000832.hg.1	chr2	+	132029531	132029559	5	28	132029531		DQ600793	DQ600793	DQ600793;DQ600793;uc021voz.1	NONCODE;GenBank;UCSCGenes	-0.00163059
	TC02000943.hg.1	TC02000943.hg.1	chr2	+	154194219	154213936	40	19717	154194219		;		ENST00000429916;OTTHUMT00000332578	ENSEMBL;Havanatranscript	-0.00427408
	TC02001145.hg.1	TC02001145.hg.1	chr2	+	198266282	198266315	10	33	198266282		SnR39B	SnR39B	ENST00000459234;uc021vul.1	ENSEMBL;UCSCGenes	0.00260158
	TC02001179.hg.1	TC02001179.hg.1	chr2	+	202288236	202288327	30	91	202288236				ENST00000365138	ENSEMBL	-0.00311489
	TC02001256.hg.1	TC02001256.hg.1	chr2	+	215825116	215826786	30	1670	215825116		;;		ENST00000420134;ENST00000420134;OTTHUMT00000337108	ENSEMBL;NONCODE;Havanatranscript	-0.00176339
	TC02001336.hg.1	TC02001336.hg.1	chr2	+	220594832	220602464	30	7632	220594832				ENST00000442416;OTTHUMT00000131979	ENSEMBL;NONCODE	-0.00998365
	TC02001378.hg.1	TC02001378.hg.1	chr2	+	231451836	231451942	30	106	231451836		RNU6-451P	RNU6-451P	ENST00000362921	ENSEMBL	0.0251235
	TC02001387.hg.1	TC02001387.hg.1	chr2	+	231998176	231998344	30	168	231998176		RNU1-93P;U1	RNU1-93P;U1	ENST00000364704;uc021vya.1	ENSEMBL;UCSCGenes	0.000460387
	TC02001392.hg.1	TC02001392.hg.1	chr2	+	232316906	232317864	30	958	232316906		;		ENST00000370380;OTTHUMT00000332748	ENSEMBL;Havanatranscript	-2.34e-05
	TC02001508.hg.1	TC02001508.hg.1	chr2	-	1344816	1350340	30	5524	1350340		;		ENST00000457467;OTTHUMT00000322451	ENSEMBL;Havanatranscript	-0.0212464
	TC02001520.hg.1	TC02001520.hg.1	chr2	-	3135353	3149551	40	14198	3149551		;;;		ENST00000419347;ENST00000425776;OTTHUMT00000322599;OTTHUMT00000322600	ENSEMBL;ENSEMBL;NONCODE;NONCODE	0.00118689
	TC02001531.hg.1	TC02001531.hg.1	chr2	-	4184234	4188321	30	4087	4188321		;		ENST00000442831;OTTHUMT00000322863	ENSEMBL;NONCODE	-0.00577176
	TC02001553.hg.1	TC02001553.hg.1	chr2	-	8741022	8763072	30	22050	8763072		;		ENST00000425678;OTTHUMT00000323325	ENSEMBL;Havanatranscript	0.00142487
	TC02001743.hg.1	TC02001743.hg.1	chr2	-	37558913	37559019	30	106	37559019		RNU6-939P	RNU6-939P	ENST00000384634	ENSEMBL	0.011993
	TC02002182.hg.1	TC02002182.hg.1	chr2	-	109293251	109295057	30	1806	109295057		;		ENST00000411710;OTTHUMT00000330257	ENSEMBL;Havanatranscript	-0.00669885
	TC02002213.hg.1	TC02002213.hg.1	chr2	-	113028848	113028944	30	96	113028944				ENST00000459403	ENSEMBL	-0.00917965
	TC02002258.hg.1	TC02002258.hg.1	chr2	-	121300485	121301902	30	1417	121301902		;		ENST00000413991;OTTHUMT00000338464	ENSEMBL;Havanatranscript	-0.00313772
	TC02002265.hg.1	TC02002265.hg.1	chr2	-	122360649	122360740	30	91	122360740				ENST00000410535	ENSEMBL	0.00229612
	TC02002338.hg.1	TC02002338.hg.1	chr2	-	131213062	131213090	5	28	131213090		DQ589348	DQ589348	DQ589348;DQ589348;uc021voq.1	NONCODE;GenBank;UCSCGenes	-0.00142859
	TC02002355.hg.1	TC02002355.hg.1	chr2	-	132587374	132589604	30	2230	132589604		;		ENST00000437330;OTTHUMT00000332207	ENSEMBL;NONCODE	-0.00311103
	TC02002587.hg.1	TC02002587.hg.1	chr2	-	182286881	182290476	30	3595	182290476		;		ENST00000456446;OTTHUMT00000334426	ENSEMBL;Havanatranscript	0.00143432
	TC02002685.hg.1	TC02002685.hg.1	chr2	-	203917008	203917141	30	133	203917141				ENST00000365189	ENSEMBL	-0.00439595
	TC02002737.hg.1	TC02002737.hg.1	chr2	-	213446081	213886269	50	440188	213886269		;		ENST00000415387;OTTHUMT00000337265	ENSEMBL;Havanatranscript	-0.00425225
	TC02002980.hg.1	TC02002980.hg.1	chr2	+	677186	682802	30	5616	677186		NA	NA	CR598144	NONCODE	-0.0112438
	TC02003021.hg.1	TC02003021.hg.1	chr2	+	9250563	9257183	58	6620	9250563		NA	NA	TCONS_l2_00013455-XLOC_l2_007191;TCONS_l2_00013456-XLOC_l2_007191;TCONS_l2_00015236-XLOC_l2_007191	BroadTUCP;BroadTUCP;BroadTUCP	0.00237815
	TC02003023.hg.1	TC02003023.hg.1	chr2	+	9705799	9715751	91	9952	9705799		NA	NA	TCONS_00003561;TCONS_00003562;TCONS_00003563;TCONS_00003564;TCONS_00003565;TCONS_00004691	NONCODE;NONCODE;NONCODE;NONCODE;NONCODE;NONCODE	-0.00224378
	TC02003034.hg.1	TC02003034.hg.1	chr2	+	11547409	11561393	30	13984	11547409		NA	NA	TCONS_00003577	NONCODE	-0.00350475
	TC02003083.hg.1	TC02003083.hg.1	chr2	+	18825464	19125152	30	299688	18825464		NA	NA	TCONS_00003590	NONCODE	-0.00984304
	TC02003146.hg.1	TC02003146.hg.1	chr2	+	32904014	33005264	92	101250	32904014		LINC00486;LINC00486;LINC00486	LINC00486	OTTHUMT00000325401;OTTHUMT00000325402;OTTHUMT00000325403	NONCODE;NONCODE;NONCODE	0.00422268
	TC02003155.hg.1	TC02003155.hg.1	chr2	+	34878421	35241682	32	363261	34878421				OTTHUMT00000325417	NONCODE	0.000520315
	TC02003411.hg.1	TC02003411.hg.1	chr2	+	92275609	92294527	23	18918	92275609		NA	NA	TCONS_00003765	NONCODE	0.00544877
	TC02003412.hg.1	TC02003412.hg.1	chr2	+	95533231	95534506	30	1275	95533231		NA	NA	CR617898	NONCODE	-0.00192135
	TC02003420.hg.1	TC02003420.hg.1	chr2	+	96477742	96480574	30	2832	96477742		NA	NA	linc_luo_1936;TCONS_00004852	NONCODE;NONCODE	-0.00484192
	TC02003427.hg.1	TC02003427.hg.1	chr2	+	98086678	98100408	30	13730	98086678		NA	NA	TCONS_00002947	NONCODE	-0.0059113
	TC02003471.hg.1	TC02003471.hg.1	chr2	+	107002769	107007850	30	5081	107002769		NA	NA	TCONS_00002651	NONCODE	-0.00183072
	TC02003519.hg.1	TC02003519.hg.1	chr2	+	114298969	114328105	68	29136	114298969		NA	NA	TCONS_l2_00013918-XLOC_l2_007509;TCONS_l2_00013919-XLOC_l2_007509;TCONS_l2_00013920-XLOC_l2_007509	BroadTUCP;BroadTUCP;BroadTUCP	-0.00110073
	TC02003620.hg.1	TC02003620.hg.1	chr2	+	145275982	145278683	40	2701	145275982		NA	NA	343044	NONCODE	0.00785641
	TC02003681.hg.1	TC02003681.hg.1	chr2	+	170961711	170963144	30	1433	170961711		NA	NA	TCONS_00003931	NONCODE	-0.0105453
	TC02003687.hg.1	TC02003687.hg.1	chr2	+	172345084	172347291	25	2207	172345084		NA	NA	TCONS_00003937	NONCODE	0.00446055
	TC02003700.hg.1	TC02003700.hg.1	chr2	+	175411869	175639555	70	227686	175411869				BC046497;ENST00000412835	NONCODE;NONCODE	-0.00264656
	TC02003827.hg.1	TC02003827.hg.1	chr2	+	218820768	218857691	40	36923	218820768		NA	NA	linc_luo_1119	NONCODE	0.0117735
	TC02003832.hg.1	TC02003832.hg.1	chr2	+	218999678	219000012	30	334	218999678		NA	NA	AB032733	NONCODE	-0.000116668
	TC02003911.hg.1	TC02003911.hg.1	chr2	+	237483126	237483980	30	854	237483126		NA	NA	AF086410	NONCODE	0.0156135
	TC02003969.hg.1	TC02003969.hg.1	chr2	-	1033074	1036926	30	3852	1036926		NA	NA	AL137277	NONCODE	0.000414931
	TC02003974.hg.1	TC02003974.hg.1	chr2	-	1624282	1629191	30	4909	1629191		NA	NA	TCONS_00003150	NONCODE	0.00163627
	TC02003975.hg.1	TC02003975.hg.1	chr2	-	2614076	2617131	23	3055	2617131		NA	NA	TCONS_00004098	NONCODE	0.0114929
	TC02003996.hg.1	TC02003996.hg.1	chr2	-	4162109	4166196	30	4087	4166196				OTTHUMT00000322863	NONCODE	-0.00293301
	TC02004031.hg.1	TC02004031.hg.1	chr2	-	8699963	8723922	110	23959	8723922		NA	NA	TCONS_l2_00014416-XLOC_l2_007884;TCONS_l2_00014417-XLOC_l2_007884;TCONS_l2_00015704-XLOC_l2_007884;TCONS_l2_00015705-XLOC_l2_007884	BroadTUCP;BroadTUCP;BroadTUCP;BroadTUCP	0.00407783
	TC02004066.hg.1	TC02004066.hg.1	chr2	-	16054622	16120458	20	65836	16120458				OTTHUMT00000323749	NONCODE	-0.0208591
	TC02004082.hg.1	TC02004082.hg.1	chr2	-	19562729	19563854	20	1125	19563854		NA	NA	TCONS_00004162	NONCODE	0.00537469
	TC02004132.hg.1	TC02004132.hg.1	chr2	-	27957840	27958477	30	637	27958477		NA	NA	TCONS_00004186	NONCODE	-0.0104691
	TC02004152.hg.1	TC02004152.hg.1	chr2	-	32018892	32029049	30	10157	32029049		NA	NA	TCONS_00003249	NONCODE	-0.00472976
	TC02004250.hg.1	TC02004250.hg.1	chr2	-	58236367	58245214	30	8847	58245214		NA	NA	BC036673	NONCODE	0.0212695
	TC02004350.hg.1	TC02004350.hg.1	chr2	-	75280620	75280991	30	371	75280991		NA	NA	X65179	NONCODE	-5.33e-05
	TC02004352.hg.1	TC02004352.hg.1	chr2	-	77733047	77735302	30	2255	77735302				OTTHUMT00000328232	NONCODE	0.00441991
	TC02004384.hg.1	TC02004384.hg.1	chr2	-	86664163	86667836	30	3673	86667836		NA	NA	BC041870	NONCODE	0.00786201
	TC02004391.hg.1	TC02004391.hg.1	chr2	-	88320097	88320452	19	355	88320452		NA	NA	TCONS_00004326	NONCODE	0.00597649
	TC02004569.hg.1	TC02004569.hg.1	chr2	-	129537889	129545768	30	7879	129545768				OTTHUMT00000331082	NONCODE	-0.00286612
	TC02004584.hg.1	TC02004584.hg.1	chr2	-	131588551	131594567	50	6016	131594567				ENST00000446213;TCONS_00002765-XLOC_002322;TCONS_00003404	NONCODE;RinnlincRNA;NONCODE	-0.00645614
	TC02004630.hg.1	TC02004630.hg.1	chr2	-	146358475	146360991	30	2516	146360991		NA	NA	TCONS_00003416	NONCODE	0.00162718
	TC02004638.hg.1	TC02004638.hg.1	chr2	-	152101986	152103089	30	1103	152103089		NA	NA	CR623291	NONCODE	-3.87e-05
	TC02004806.hg.1	TC02004806.hg.1	chr2	-	217455149	217471661	40	16512	217471661		NA	NA	TCONS_00003496	NONCODE	-0.0103163
	TC02004838.hg.1	TC02004838.hg.1	chr2	-	228573101	228575446	30	2345	228575446		AX746677	AX746677	uc002vpk.1	NONCODE	0.000903647
	TC02004869.hg.1	TC02004869.hg.1	chr2	-	238031500	238067164	50	35664	238067164		NA	NA	linc_luo_1125;TCONS_00003517	NONCODE;NONCODE	-0.00586404
	TC03000025.hg.1	TC03000025.hg.1	chr3	+	8121009	8154611	60	33602	8121009		;		ENST00000428171;OTTHUMT00000337853	ENSEMBL;Havanatranscript	-0.00442769
	TC03000170.hg.1	TC03000170.hg.1	chr3	+	34244736	34310303	30	65567	34244736		;		ENST00000455974;OTTHUMT00000341535	ENSEMBL;Havanatranscript	0.00296245
	TC03000270.hg.1	TC03000270.hg.1	chr3	+	47507839	47507938	30	99	47507839				ENST00000459156	ENSEMBL	0.00253579
	TC03000452.hg.1	TC03000452.hg.1	chr3	+	81889698	81972012	50	82314	81889698		;		ENST00000471614;OTTHUMT00000352889	ENSEMBL;Havanatranscript	-0.00330869
	TC03000514.hg.1	TC03000514.hg.1	chr3	+	100920676	100920779	30	103	100920676				ENST00000459246	ENSEMBL	-0.0036898
	TC03000651.hg.1	TC03000651.hg.1	chr3	+	125775766	125777071	30	1305	125775766		;		ENST00000508263;OTTHUMT00000369848	ENSEMBL;Havanatranscript	-0.00044751
	TC03000697.hg.1	TC03000697.hg.1	chr3	+	129538620	129538719	30	99	129538620		RNU6-1142P	RNU6-1142P	ENST00000516977	ENSEMBL	0.00104147
	TC03000784.hg.1	TC03000784.hg.1	chr3	+	145679542	145681410	30	1868	145679542		;		ENST00000494509;OTTHUMT00000355092	ENSEMBL;Havanatranscript	-0.0113555
	TC03000792.hg.1	TC03000792.hg.1	chr3	+	147657791	147724542	50	66751	147657791		;;;		ENST00000467198;ENST00000485006;AK098763;OTTHUMT00000355526;OTTHUMT00000355799;uc003ewf.1	ENSEMBL;ENSEMBL;GenBank;Havanatranscript;Havanatranscript;UCSCGenes	-0.00124188
	TC06002041.hg.1	TC06002041.hg.1	chr6	-	115188037	115188140	30	103	115188140		RNU6-475P	RNU6-475P	ENST00000516073	ENSEMBL	0.00281421
	TC03000980.hg.1	TC03000980.hg.1	chr3	+	183169645	183169776	30	131	183169645				ENST00000364359	ENSEMBL	0.0453909
	TC03001078.hg.1	TC03001078.hg.1	chr3	+	194426277	194427693	30	1416	194426277		;		ENST00000439479;OTTHUMT00000342737	ENSEMBL;Havanatranscript	-0.00192928
	TC03001181.hg.1	TC03001181.hg.1	chr3	-	12903755	12903783	5	28	12903783		DQ574002	DQ574002	DQ574002;DQ574002;uc021wte.1	NONCODE;GenBank;UCSCGenes	0.0145219
	TC03001184.hg.1	TC03001184.hg.1	chr3	-	12904923	12904952	2	29	12904952		DQ587809	DQ587809	DQ587809;DQ587809;uc021wtg.1	NONCODE;GenBank;UCSCGenes	-0.0188119
	TC03001219.hg.1	TC03001219.hg.1	chr3	-	17084268	17085684	30	1416	17085684		PLCL2-AS1;PLCL2-AS1	PLCL2-AS1	ENST00000414844;OTTHUMT00000340248	ENSEMBL;Havanatranscript	-0.00523751
	TC03001321.hg.1	TC03001321.hg.1	chr3	-	42469210	42469304	27	94	42469304		NA	NA	ENST00000401194	ENSEMBL	0.00367169
	TC03001483.hg.1	TC03001483.hg.1	chr3	-	55527858	55539289	40	11431	55539289		;		ENST00000472238;OTTHUMT00000350850	ENSEMBL;Havanatranscript	-0.000485927
	TC03001523.hg.1	TC03001523.hg.1	chr3	-	64057484	64057695	30	211	64057695				ENST00000363352	ENSEMBL	-0.0115451
	TC03001558.hg.1	TC03001558.hg.1	chr3	-	73141299	73141408	30	109	73141408		RNU6-557P	RNU6-557P	ENST00000516842	ENSEMBL	0.0139233
	TC03001636.hg.1	TC03001636.hg.1	chr3	-	108737757	108737963	30	206	108737963				ENST00000408706	ENSEMBL	-0.00500852
	TC03001793.hg.1	TC03001793.hg.1	chr3	-	132733848	132755896	30	22048	132755896		;		ENST00000505557;OTTHUMT00000357034	ENSEMBL;Havanatranscript	0.00346336
	TC03001852.hg.1	TC03001852.hg.1	chr3	-	142126499	142126579	30	80	142126579		RNU6-1294P	RNU6-1294P	ENST00000515995	ENSEMBL	0.00840536
	TC03001927.hg.1	TC03001927.hg.1	chr3	-	155459933	155461515	30	1582	155461515				ENST00000399242	ENSEMBL	-0.00196764
	TC03002085.hg.1	TC03002085.hg.1	chr3	-	186359299	186383496	40	24197	186383496		;;;		ENST00000428501;ENST00000455926;OTTHUMT00000344759;OTTHUMT00000344760	ENSEMBL;ENSEMBL;Havanatranscript;Havanatranscript	0.00556065
	TC03002172.hg.1	TC03002172.hg.1	chr3	-	196710761	196713813	30	3052	196713813				ENST00000445739	ENSEMBL	-0.00827079
	TC03002188.hg.1	TC03002188.hg.1	chr3	-	197798182	197798288	30	106	197798288		RNU6-821P	RNU6-821P	ENST00000390995	ENSEMBL	-0.0111736
	TC03002245.hg.1	TC03002245.hg.1	chr3	+	18486516	18572768	126	86252	18486516		NA	NA	linc_luo_1606;TCONS_l2_00018460-XLOC_l2_009639;TCONS_l2_00018461-XLOC_l2_009639;TCONS_l2_00018462-XLOC_l2_009639;TCONS_l2_00018463-XLOC_l2_009639;TCONS_l2_00018464-XLOC_l2_009639;TCONS_l2_00019762-XLOC_l2_009639;TCONS_l2_00019763-XLOC_l2_009639	NONCODE;BroadTUCP;BroadTUCP;BroadTUCP;BroadTUCP;BroadTUCP;BroadTUCP;BroadTUCP	-0.00263372
	TC03002295.hg.1	TC03002295.hg.1	chr3	+	39462167	39465596	30	3429	39462167		NA	NA	TCONS_00005995	NONCODE	0.0257196
	TC03002297.hg.1	TC03002297.hg.1	chr3	+	40487844	40494776	30	6932	40487844		NA	NA	linc_luo_1588	NONCODE	-0.00513028
	TC03002301.hg.1	TC03002301.hg.1	chr3	+	40684765	40685532	30	767	40684765		NA	NA	TCONS_00005996	NONCODE	-0.000787161
	TC03002359.hg.1	TC03002359.hg.1	chr3	+	58165851	58173195	21	7344	58165851		NA	NA	TCONS_00006033	NONCODE	0.0190501
	TC03002382.hg.1	TC03002382.hg.1	chr3	+	70216957	70221713	30	4756	70216957		NA	NA	TCONS_00006086	NONCODE	0.00800075
	TC03002405.hg.1	TC03002405.hg.1	chr3	+	78316090	78343881	63	27791	78316090		NA	NA	TCONS_00005546;TCONS_00005547;TCONS_00005548	NONCODE;NONCODE;NONCODE	-0.0359961
	TC03002451.hg.1	TC03002451.hg.1	chr3	+	106146912	106148951	30	2039	106146912		NA	NA	BC033544	NONCODE	0.00861789
	TC03002483.hg.1	TC03002483.hg.1	chr3	+	117376776	117381146	30	4370	117376776		NA	NA	TCONS_00006167	NONCODE	-0.0043354
	TC03002508.hg.1	TC03002508.hg.1	chr3	+	125485334	125505694	18	20360	125485334		NA	NA	TCONS_00006196	NONCODE	0.00100664
	TC03002513.hg.1	TC03002513.hg.1	chr3	+	125934371	125966235	30	31864	125934371		NA	NA	TCONS_00006200	NONCODE	0.000295325
	TC03002566.hg.1	TC03002566.hg.1	chr3	+	141121660	141161439	30	39779	141121660		NA	NA	AX721161	NONCODE	0.0107012
	TC03002604.hg.1	TC03002604.hg.1	chr3	+	151488216	151502682	70	14466	151488216		NA	NA	linc_luo_1406;TCONS_l2_00018935-XLOC_l2_009947;TCONS_l2_00019934-XLOC_l2_009947;TCONS_l2_00019935-XLOC_l2_009947;TCONS_l2_00019936-XLOC_l2_009947	NONCODE;BroadTUCP;BroadTUCP;BroadTUCP;BroadTUCP	-0.00382351
	TC03002702.hg.1	TC03002702.hg.1	chr3	+	185000760	185010833	30	10073	185000760		NA	NA	linc_luo_324	NONCODE	-0.00132114
	TC03002721.hg.1	TC03002721.hg.1	chr3	+	188850043	188870789	60	20746	188850043		NA	NA	linc_luo_1160	NONCODE	0.000283704
	TC03002738.hg.1	TC03002738.hg.1	chr3	+	194208183	194239008	40	30825	194208183		LINC00884;LINC00884	LINC00884	ENST00000437597;ENST00000448892	NONCODE;NONCODE	-0.00345683
	TC03002845.hg.1	TC03002845.hg.1	chr3	-	28038701	28070095	30	31394	28070095		NA	NA	TCONS_l2_00020100-XLOC_l2_010141;TCONS_l2_00020101-XLOC_l2_010141	BroadTUCP;BroadTUCP	-0.00759137
	TC03002871.hg.1	TC03002871.hg.1	chr3	-	40758901	40762498	30	3597	40762498		NA	NA	TCONS_00006492	NONCODE	-0.0159304
	TC03002927.hg.1	TC03002927.hg.1	chr3	-	55527858	55539289	40	11431	55539289		NA	NA	TCONS_00005778	NONCODE	-0.00383547
	TC03003126.hg.1	TC03003126.hg.1	chr3	-	144160698	144164686	30	3988	144164686		NA	NA	AF132204	NONCODE	0.0314364
	TC03003251.hg.1	TC03003251.hg.1	chr3	-	185000754	185010864	40	10110	185010864		NA	NA	linc_luo_225	NONCODE	0.00331082
	TC03003283.hg.1	TC03003283.hg.1	chr3	-	194482847	194489441	40	6594	194489441		NA	NA	TCONS_00005926;TCONS_00007330	NONCODE;NONCODE	-0.0105595
	TC04000008.hg.1	TC04000008.hg.1	chr4	+	403598	403704	30	106	403598				ENST00000390148	ENSEMBL	0.00363947
	TC04000034.hg.1	TC04000034.hg.1	chr4	+	2141400	2142785	30	1385	2141400		;		ENST00000502636;OTTHUMT00000357395	ENSEMBL;Havanatranscript	0.000165467
	TC07000544.hg.1	TC07000544.hg.1	chr7	+	90940683	91144724	100	204041	90940683		;;;;;		ENST00000418395;ENST00000419226;ENST00000449361;OTTHUMT00000342904;OTTHUMT00000342906;OTTHUMT00000342909	ENSEMBL;ENSEMBL;ENSEMBL;Havanatranscript;Havanatranscript;Havanatranscript	-0.0111598
	TC04000124.hg.1	TC04000124.hg.1	chr4	+	10686627	10699285	30	12658	10686627		;		ENST00000505494;OTTHUMT00000359050	ENSEMBL;Havanatranscript	-0.00427325
	TC04000146.hg.1	TC04000146.hg.1	chr4	+	16180562	16184743	30	4181	16180562		;		ENST00000513586;OTTHUMT00000359586	ENSEMBL;Havanatranscript	-0.0134736
	TC04000227.hg.1	TC04000227.hg.1	chr4	+	39400769	39400868	30	99	39400769		RNU6-887P	RNU6-887P	ENST00000410660	ENSEMBL	0.0066377
	TC04000262.hg.1	TC04000262.hg.1	chr4	+	42894413	42894635	30	222	42894413		RN7SKP82;7SK	RN7SKP82;7SK	ENST00000516786;7SK;uc021xnw.1	ENSEMBL;lncRNADb;UCSCGenes	-0.00467177
	TC04000354.hg.1	TC04000354.hg.1	chr4	+	63994029	64009599	17	15570	63994029				ENST00000507857	ENSEMBL	0.000210725
	TC04000495.hg.1	TC04000495.hg.1	chr4	+	91291274	91291578	30	304	91291274		RN7SKP248;7SK	RN7SKP248;7SK	ENST00000516278;7SK;uc021xqe.1	ENSEMBL;lncRNADb;UCSCGenes	-0.0129609
	TC04000509.hg.1	TC04000509.hg.1	chr4	+	99094935	99095030	30	95	99094935				ENST00000363788	ENSEMBL	0.00142992
	TC04000550.hg.1	TC04000550.hg.1	chr4	+	107354781	107374605	40	19824	107354781		;		ENST00000504132;OTTHUMT00000363306	ENSEMBL;Havanatranscript	1.83e-05
	TC04000613.hg.1	TC04000613.hg.1	chr4	+	120299287	120326770	30	27483	120299287		AK097701;AK097701	AK097701	ENST00000307499;AK097701;uc003icx.1;uc003icx.1	ENSEMBL;GenBank;UCSCGenes;NONCODE	-0.00050016
	TC04000660.hg.1	TC04000660.hg.1	chr4	+	132689295	132689404	30	109	132689295				ENST00000516205	ENSEMBL	-0.0038008
	TC04000695.hg.1	TC04000695.hg.1	chr4	+	143487172	143582103	30	94931	143487172		;		ENST00000509497;OTTHUMT00000364608	ENSEMBL;Havanatranscript	0.0229099
	TC04000794.hg.1	TC04000794.hg.1	chr4	+	157797587	157797972	30	385	157797587		NA	NA	OTTHUMT00000366131	Havanatranscript	-0.00302067
	TC04000896.hg.1	TC04000896.hg.1	chr4	+	185353120	185353203	30	83	185353120				ENST00000516069	ENSEMBL	0.0235164
	TC04000965.hg.1	TC04000965.hg.1	chr4	-	1575788	1581980	30	6192	1581980		AX748388;;;AX748388	AX748388	ENST00000466692;OTTHUMT00000350727;uc003gdg.1;uc003gdg.1	ENSEMBL;Havanatranscript;UCSCGenes;NONCODE	0.0135042
	TC04001019.hg.1	TC04001019.hg.1	chr4	-	8455137	8456669	30	1532	8456669		;		ENST00000515186;OTTHUMT00000363007	ENSEMBL;Havanatranscript	-0.00374201
	TC04001213.hg.1	TC04001213.hg.1	chr4	-	56367762	56367875	30	113	56367875				ENST00000459424	ENSEMBL	-0.00104323
	TC04001240.hg.1	TC04001240.hg.1	chr4	-	63994030	64009599	18	15569	64009599		NA	NA	OTTHUMT00000368589	Havanatranscript	0.0161668
	TC04001271.hg.1	TC04001271.hg.1	chr4	-	71568735	71568840	30	105	71568840		RNU6-784P	RNU6-784P	ENST00000384330	ENSEMBL	0.00583055
	TC04001358.hg.1	TC04001358.hg.1	chr4	-	87257471	87257767	30	296	87257767		7SK;RN7SKP96	7SK;RN7SKP96	ENST00000516948;7SK;uc021xpt.1	ENSEMBL;lncRNADb;UCSCGenes	-0.0033057
	TC04001389.hg.1	TC04001389.hg.1	chr4	-	93218402	93225329	30	6927	93225329		;		ENST00000504213;OTTHUMT00000362943	ENSEMBL;Havanatranscript	-0.0134566
	TC04001470.hg.1	TC04001470.hg.1	chr4	-	111516671	111536614	60	19943	111536614		;;;		ENST00000503456;ENST00000513690;OTTHUMT00000363857;OTTHUMT00000363858	ENSEMBL;ENSEMBL;Havanatranscript;Havanatranscript	0.00277976
	TC04001614.hg.1	TC04001614.hg.1	chr4	-	146563488	146571776	30	8288	146571776		;		ENST00000504555;OTTHUMT00000367785	ENSEMBL;Havanatranscript	-0.000174441
	TC04001628.hg.1	TC04001628.hg.1	chr4	-	149740503	149741108	30	605	149741108		NA	NA	OTTHUMT00000364983	Havanatranscript	0.00520326
	TC04001707.hg.1	TC04001707.hg.1	chr4	-	166214275	166214461	30	186	166214461		U2	U2	uc021xtz.1	UCSCGenes	0.00748866
	TC04001855.hg.1	TC04001855.hg.1	chr4	+	1546985	1555291	189	8306	1546985		NA	NA	TCONS_00007953;TCONS_00007954;TCONS_00007955;TCONS_00008737;TCONS_00008738;TCONS_00008739;TCONS_00008740	NONCODE;NONCODE;NONCODE;NONCODE;NONCODE;NONCODE;NONCODE	0.00556926
	TC04001881.hg.1	TC04001881.hg.1	chr4	+	6315486	6319667	30	4181	6315486		NA	NA	TCONS_00007969	NONCODE	-0.00207083
	TC04001908.hg.1	TC04001908.hg.1	chr4	+	11370661	11375365	46	4704	11370661		NA	NA	linc_luo_2083;TCONS_l2_00020419-XLOC_l2_010581;TCONS_l2_00020420-XLOC_l2_010581	NONCODE;BroadTUCP;BroadTUCP	0.00734671
	TC04001955.hg.1	TC04001955.hg.1	chr4	+	28754425	28754905	30	480	28754425		NA	NA	TCONS_00007497	NONCODE	-0.00316022
	TC04002197.hg.1	TC04002197.hg.1	chr4	+	129431493	129436412	30	4919	129431493		NA	NA	TCONS_l2_00021705-XLOC_l2_010831	BroadTUCP	-0.00043796
	TC04002225.hg.1	TC04002225.hg.1	chr4	+	139230866	139345498	80	114632	139230866		NA	NA	TCONS_l2_00020785-XLOC_l2_010855;TCONS_l2_00020786-XLOC_l2_010855;TCONS_l2_00021725-XLOC_l2_010855;TCONS_l2_00021726-XLOC_l2_010855;TCONS_l2_00021727-XLOC_l2_010855	BroadTUCP;BroadTUCP;BroadTUCP;BroadTUCP;BroadTUCP	-0.00478463
	TC04002281.hg.1	TC04002281.hg.1	chr4	+	156363959	156368776	50	4817	156363959		NA	NA	TCONS_00008301;TCONS_00008302	NONCODE;NONCODE	0.00125193
	TC04002332.hg.1	TC04002332.hg.1	chr4	+	174990969	175001205	30	10236	174990969		NA	NA	TCONS_l2_00020896-XLOC_l2_010948	BroadTUCP	0.00222946
	TC04002431.hg.1	TC04002431.hg.1	chr4	-	4546465	4571271	30	24806	4571271		NA	NA	linc_luo_1173	NONCODE	-0.00395093
	TC04002524.hg.1	TC04002524.hg.1	chr4	-	41222115	41223379	17	1264	41223379		NA	NA	TCONS_00008471	NONCODE	0.0134975
	TC04002569.hg.1	TC04002569.hg.1	chr4	-	63994030	64009599	18	15569	64009599		NA	NA	TCONS_00007773	NONCODE	0.00901205
	TC04002659.hg.1	TC04002659.hg.1	chr4	-	105890402	106041159	50	150757	106041159		NA	NA	linc_luo_1164	NONCODE	0.0121293
	TC04002732.hg.1	TC04002732.hg.1	chr4	-	135854044	135855286	30	1242	135855286		NA	NA	TCONS_00007837	NONCODE	-0.0167911
	TC04002743.hg.1	TC04002743.hg.1	chr4	-	139202778	139207245	30	4467	139207245		NA	NA	TCONS_00008588	NONCODE	-0.00147254
	TC04002803.hg.1	TC04002803.hg.1	chr4	-	160587655	160698936	29	111281	160698936		NA	NA	TCONS_00007890	NONCODE	0.00222186
	TC04002814.hg.1	TC04002814.hg.1	chr4	-	170770217	170782640	30	12423	170782640		NA	NA	TCONS_00008642	NONCODE	-0.00197743
	TC04002840.hg.1	TC04002840.hg.1	chr4	-	175411328	175444044	70	32716	175444044		NA	NA	NR_027332	NONCODE	-0.0292055
	TC05000094.hg.1	TC05000094.hg.1	chr5	+	16617334	16621385	40	4051	16617334		;		ENST00000504935;OTTHUMT00000366178	ENSEMBL;Havanatranscript	-0.00667298
	TC05000259.hg.1	TC05000259.hg.1	chr5	+	60213317	60215400	30	2083	60213317		;		ENST00000457499;OTTHUMT00000332613	ENSEMBL;Havanatranscript	0.0143698
	TC05000474.hg.1	TC05000474.hg.1	chr5	+	96424779	96772921	80	348142	96424779		;;;		ENST00000504578;ENST00000509481;OTTHUMT00000370138;OTTHUMT00000370857	ENSEMBL;ENSEMBL;Havanatranscript;Havanatranscript	0.00232991
	TC05000510.hg.1	TC05000510.hg.1	chr5	+	108227138	108227247	30	109	108227138				ENST00000384673	ENSEMBL	-0.00719528
	TC05000528.hg.1	TC05000528.hg.1	chr5	+	111527717	111545836	80	18119	111527717		;;;;;		ENST00000505825;ENST00000506875;ENST00000515563;OTTHUMT00000370963;OTTHUMT00000370964;OTTHUMT00000370965	ENSEMBL;ENSEMBL;ENSEMBL;Havanatranscript;Havanatranscript;Havanatranscript	0.0144844
	TC05000787.hg.1	TC05000787.hg.1	chr5	+	142938784	142942113	40	3329	142938784		;		ENST00000514942;OTTHUMT00000371895	ENSEMBL;Havanatranscript	0.00466692
	TC05000963.hg.1	TC05000963.hg.1	chr5	+	173001941	173003278	30	1337	173001941		;		ENST00000520300;OTTHUMT00000372785	ENSEMBL;Havanatranscript	0.000563635
	TC05000977.hg.1	TC05000977.hg.1	chr5	+	174247030	174253327	30	6297	174247030		;		ENST00000510150;OTTHUMT00000371789	ENSEMBL;Havanatranscript	1.3e-05
	TC05001065.hg.1	TC05001065.hg.1	chr5	+	180237401	180238384	30	983	180237401		NA	NA	OTTHUMT00000368194	Havanatranscript	-5.71e-05
	TC05001078.hg.1	TC05001078.hg.1	chr5	+	180614701	180614782	30	81	180614701		TRNA_Leu	TRNA_Leu	uc021yjy.1	UCSCGenes	0.00300366
	TC05001228.hg.1	TC05001228.hg.1	chr5	-	31747751	31748185	30	434	31748185		;		ENST00000509629;OTTHUMT00000369330	ENSEMBL;Havanatranscript	0.00164643
	TC05001384.hg.1	TC05001384.hg.1	chr5	-	57403459	57418168	40	14709	57418168		;		ENST00000505861;OTTHUMT00000367831	ENSEMBL;Havanatranscript	0.00314138
	TC05001413.hg.1	TC05001413.hg.1	chr5	-	65257011	65257147	30	136	65257147				ENST00000517095	ENSEMBL	-5.5e-05
	TC05001503.hg.1	TC05001503.hg.1	chr5	-	75987264	76012040	40	24776	76012040		;;		ENST00000507514;ENST00000507514;OTTHUMT00000368873	ENSEMBL;NONCODE;Havanatranscript	0.000313559
	TC05001514.hg.1	TC05001514.hg.1	chr5	-	77318776	77318848	30	72	77318848		TRNA_Pseudo	TRNA_Pseudo	uc021yau.1	UCSCGenes	0.00144048
	TC05001515.hg.1	TC05001515.hg.1	chr5	-	77352448	77352570	30	122	77352570				ENST00000410153	ENSEMBL	0.000698418
	TC05001753.hg.1	TC05001753.hg.1	chr5	-	127706792	127706905	30	113	127706905				ENST00000384560	ENSEMBL	-0.00144745
	TC08001939.hg.1	TC08001939.hg.1	chr8	+	60959352	61028506	50	69154	60959352		NA	NA	TCONS_00014724;TCONS_00014725	NONCODE;NONCODE	0.0138944
	TC05002026.hg.1	TC05002026.hg.1	chr5	-	164647583	164668758	60	21175	164668758		;;;		ENST00000521341;ENST00000523538;OTTHUMT00000376029;OTTHUMT00000376030	ENSEMBL;ENSEMBL;Havanatranscript;Havanatranscript	-0.00176709
	TC05002032.hg.1	TC05002032.hg.1	chr5	-	166733278	166736875	30	3597	166736875		;		ENST00000519892;OTTHUMT00000371030	ENSEMBL;Havanatranscript	0.0229468
	TC05002074.hg.1	TC05002074.hg.1	chr5	-	172720132	172721732	30	1600	172721732		NA	NA	ENST00000501670	ENSEMBL	0.0123609
	TC05002187.hg.1	TC05002187.hg.1	chr5	+	1858523	1860004	30	1481	1858523		NA	NA	AK098578	NONCODE	0.00667767
	TC05002197.hg.1	TC05002197.hg.1	chr5	+	3178209	3181346	30	3137	3178209		NA	NA	TCONS_00009330	NONCODE	-0.0064489
	TC05002215.hg.1	TC05002215.hg.1	chr5	+	7271519	7277834	89	6315	7271519		NA	NA	linc_luo_1255;TCONS_00009861;TCONS_00009862;TCONS_00010614	NONCODE;NONCODE;NONCODE;NONCODE	-0.0112781
	TC05002222.hg.1	TC05002222.hg.1	chr5	+	8020150	8052115	30	31965	8020150		NA	NA	TCONS_00009346	NONCODE	0.000184217
	TC05002270.hg.1	TC05002270.hg.1	chr5	+	10564450	10657959	51	93509	10564450		NA	NA	TCONS_l2_00022197-XLOC_l2_011490;TCONS_l2_00022198-XLOC_l2_011490;TCONS_l2_00022199-XLOC_l2_011490	BroadTUCP;BroadTUCP;BroadTUCP	-0.000826934
	TC05002305.hg.1	TC05002305.hg.1	chr5	+	23013157	23014636	30	1479	23013157		NA	NA	TCONS_00009370	NONCODE	-0.00652045
	TC05002306.hg.1	TC05002306.hg.1	chr5	+	23951457	24178799	70	227342	23951457		AX747383	AX747383	TCONS_l2_00022231-XLOC_l2_011514;uc003jgq.1	BroadTUCP;NONCODE	-0.00207504
	TC05002336.hg.1	TC05002336.hg.1	chr5	+	38148582	38153817	30	5235	38148582		NA	NA	TCONS_00009384-XLOC_004344	RinnlincRNA	0.000692124
	TC05002367.hg.1	TC05002367.hg.1	chr5	+	45890318	45896072	30	5754	45890318		NA	NA	TCONS_00009396	NONCODE	-0.0119441
	TC05002431.hg.1	TC05002431.hg.1	chr5	+	70741443	70742396	30	953	70741443		NA	NA	TCONS_00009415	NONCODE	-7.87e-05
	TC05002447.hg.1	TC05002447.hg.1	chr5	+	72747323	72749220	30	1897	72747323		NA	NA	TCONS_00009424	NONCODE	0.00121506
	TC05002468.hg.1	TC05002468.hg.1	chr5	+	78280585	78282354	30	1769	78280585		NA	NA	CR604870	NONCODE	-0.00116899
	TC05002474.hg.1	TC05002474.hg.1	chr5	+	79314789	79315919	30	1130	79314789		NA	NA	TCONS_l2_00022387-XLOC_l2_011649	BroadTUCP	0.00128429
	TC05002539.hg.1	TC05002539.hg.1	chr5	+	101836245	101841374	30	5129	101836245		NA	NA	TCONS_00009473;TCONS_00009474	NONCODE;NONCODE	-0.0114335
	TC05002653.hg.1	TC05002653.hg.1	chr5	+	139496843	139501752	30	4909	139496843		NA	NA	CR611332;linc_luo_401	NONCODE;NONCODE	0.0132561
	TC05002676.hg.1	TC05002676.hg.1	chr5	+	142938784	142942113	40	3329	142938784		NA	NA	TCONS_00009532	NONCODE	0.00389934
	TC05002738.hg.1	TC05002738.hg.1	chr5	+	172199211	172209337	60	10126	172199211		NA	NA	TCONS_00010172;TCONS_00010173;TCONS_00010832	NONCODE;NONCODE;NONCODE	0.000838576
	TC05002739.hg.1	TC05002739.hg.1	chr5	+	172243602	172252561	30	8959	172243602		NA	NA	TCONS_00010174;TCONS_00010833	NONCODE;NONCODE	0.011685
	TC05002787.hg.1	TC05002787.hg.1	chr5	+	180296862	180298361	30	1499	180296862		NA	NA	TCONS_00010217	NONCODE	0.000347875
	TC05002822.hg.1	TC05002822.hg.1	chr5	-	2831135	2835253	30	4118	2835253		NA	NA	TCONS_00009583	NONCODE	0.00481189
	TC05002840.hg.1	TC05002840.hg.1	chr5	-	6686438	6710411	110	23973	6710411		NA	NA	TCONS_00009596-XLOC_004725;TCONS_00009597;TCONS_00010259;TCONS_00010260	RinnlincRNA;NONCODE;NONCODE;NONCODE	-0.00233314
	TC05002907.hg.1	TC05002907.hg.1	chr5	-	14663208	14664704	30	1496	14664704		NA	NA	CR591631	NONCODE	0.000126763
	TC05002991.hg.1	TC05002991.hg.1	chr5	-	50261453	50266021	67	4568	50266021		NA	NA	TCONS_00009660;TCONS_00009661;TCONS_00010327	NONCODE;NONCODE;NONCODE	-0.0121411
	TC05003040.hg.1	TC05003040.hg.1	chr5	-	67734922	67740786	30	5864	67740786		NA	NA	TCONS_00009685	NONCODE	-0.000614099
	TC05003071.hg.1	TC05003071.hg.1	chr5	-	72236631	72251181	30	14550	72251181		NA	NA	TCONS_00010375	NONCODE	0.0287957
	TC05003082.hg.1	TC05003082.hg.1	chr5	-	73924208	73924524	30	316	73924524		NA	NA	Z36801	NONCODE	-0.0323305
	TC05003118.hg.1	TC05003118.hg.1	chr5	-	80813191	80815724	30	2533	80815724		NA	NA	BC041991	NONCODE	0.00405167
	TC05003197.hg.1	TC05003197.hg.1	chr5	-	116078687	116097905	40	19218	116097905		NA	NA	TCONS_00009757	NONCODE	-0.00860839
	TC05003234.hg.1	TC05003234.hg.1	chr5	-	131584600	131631008	40	46408	131631008		NA	NA	BC030525	NONCODE	0.0013379
	TC05003247.hg.1	TC05003247.hg.1	chr5	-	134460070	134466939	30	6869	134466939		NA	NA	TCONS_00009791	NONCODE	-0.0055799
	TC05003267.hg.1	TC05003267.hg.1	chr5	-	139780100	139781013	30	913	139781013		NA	NA	BC030152;uc003lfn.2	NONCODE;NONCODE	-0.00298977
	TC05003391.hg.1	TC05003391.hg.1	chr5	-	180632361	180633120	30	759	180633120		NA	NA	TCONS_00009825	NONCODE	0.00750975
	TC05003392.hg.1	TC05003392.hg.1	chr5	-	180634462	180644800	30	10338	180644800		NA	NA	TCONS_00010589	NONCODE	0.000226119
	TC06000091.hg.1	TC06000091.hg.1	chr6	+	13486526	13487084	30	558	13486526		GFOD1-AS1;GFOD1-AS1	GFOD1-AS1	ENST00000446001;OTTHUMT00000039900	ENSEMBL;Havanatranscript	0.000233424
	TC06000204.hg.1	TC06000204.hg.1	chr6	+	26595102	26595190	30	88	26595102		TRNA_Tyr	TRNA_Tyr	uc021ynw.1	UCSCGenes	0.0246476
	TC06000254.hg.1	TC06000254.hg.1	chr6	+	27586135	27586208	30	73	27586135		TRNA_Thr	TRNA_Thr	uc021yqq.1	UCSCGenes	-0.0110364
	TC06000506.hg.1	TC06000506.hg.1	chr6	+	34660557	34660660	30	103	34660557				ENST00000459226	ENSEMBL	-0.00669733
	TC06000551.hg.1	TC06000551.hg.1	chr6	+	38147074	38149010	30	1936	38147074		AX747659	AX747659	uc003oob.1	UCSCGenes	0.00182086
	TC06000724.hg.1	TC06000724.hg.1	chr6	+	72160537	72168577	40	8040	72160537		;		ENST00000431997;OTTHUMT00000041164	ENSEMBL;NONCODE	-0.00626862
	TC06000764.hg.1	TC06000764.hg.1	chr6	+	82331917	82332036	30	119	82331917		RNA5SP210	RNA5SP210	ENST00000391034	ENSEMBL	0.0103608
	TC06000887.hg.1	TC06000887.hg.1	chr6	+	111284669	111284772	30	103	111284669				ENST00000458794	ENSEMBL	-0.00151659
	TC06001157.hg.1	TC06001157.hg.1	chr6	+	161119320	161121664	30	2344	161119320		;;;		ENST00000447702;ENST00000448126;OTTHUMT00000042954;OTTHUMT00000042955	ENSEMBL;ENSEMBL;NONCODE;NONCODE	-0.00842707
	TC06001285.hg.1	TC06001285.hg.1	chr6	-	14391462	14393519	40	2057	14393519		;		ENST00000456440;OTTHUMT00000039920	ENSEMBL;NONCODE	-0.0237767
	TC06001292.hg.1	TC06001292.hg.1	chr6	-	16232462	16232561	30	99	16232561				ENST00000384464	ENSEMBL	0.00399904
	TC06001417.hg.1	TC06001417.hg.1	chr6	-	27696327	27696399	30	72	27696399		TRNA_Val	TRNA_Val	uc021yrf.1	UCSCGenes	0.000661376
	TC06001464.hg.1	TC06001464.hg.1	chr6	-	28770577	28770647	30	70	28770647		TRNA_Ala	TRNA_Ala	uc021ysy.1	UCSCGenes	0.00090911
	TC06001476.hg.1	TC06001476.hg.1	chr6	-	28911399	28911480	30	81	28911480		TRNA_Leu	TRNA_Leu	uc021ytj.1	UCSCGenes	0.000837378
	TC09002372.hg.1	TC09002372.hg.1	chr9	-	1031219	1032520	30	1301	1032520		NA	NA	OTTHUMT00000051497	NONCODE	-0.00395262
	TC06001983.hg.1	TC06001983.hg.1	chr6	-	106806441	106807592	30	1151	106807592		;		ENST00000449180;OTTHUMT00000041665	ENSEMBL;NONCODE	-0.0102134
	TC09002768.hg.1	TC09002768.hg.1	chr9	-	120224572	120228538	30	3966	120228538		NA	NA	TCONS_00015876	NONCODE	0.000602108
	TC06002253.hg.1	TC06002253.hg.1	chr6	-	156869046	156869120	30	74	156869120		TRNA_Pseudo	TRNA_Pseudo	uc021zhi.1	UCSCGenes	-0.000431264
	TC06002391.hg.1	TC06002391.hg.1	chr6	+	1369125	1372586	69	3461	1369125		NA	NA	NR_001434_7	NONCODE	0.00212172
	TC06002553.hg.1	TC06002553.hg.1	chr6	+	6637976	6659207	21	21231	6637976		NA	NA	OTTHUMT00000039763	NONCODE	0.00464352
	TC06002583.hg.1	TC06002583.hg.1	chr6	+	11810835	11811481	30	646	11810835		NA	NA	TCONS_00011268	NONCODE	0.00596817
	TC06002622.hg.1	TC06002622.hg.1	chr6	+	23349662	23370502	40	20840	23349662		NA	NA	TCONS_00011734;TCONS_00012436	NONCODE;NONCODE	-0.0079096
	TC06002630.hg.1	TC06002630.hg.1	chr6	+	25292177	25292479	26	302	25292177		NA	NA	Z83937	NONCODE	-0.00141412
	TC06002633.hg.1	TC06002633.hg.1	chr6	+	25439997	25440485	30	488	25439997		NA	NA	Y10208	NONCODE	-0.00279289
	TC06002678.hg.1	TC06002678.hg.1	chr6	+	29061959	29064292	56	2333	29061959		HCG15;HCG16	HCG15;HCG16	OTTHUMT00000076582;OTTHUMT00000076588	NONCODE;NONCODE	0.00956186
	TC06002710.hg.1	TC06002710.hg.1	chr6	+	31430957	31433586	30	2629	31430957		NA	NA	NR_040662_4	NONCODE	-0.0226705
	TC06002718.hg.1	TC06002718.hg.1	chr6	+	31789991	31795104	30	5113	31789991		NA	NA	TCONS_00011779	NONCODE	0.0144162
	TC06002727.hg.1	TC06002727.hg.1	chr6	+	32685782	32686612	32	830	32685782		NA	NA	TCONS_00011291;TCONS_00011292;TCONS_00011293	NONCODE;NONCODE;NONCODE	0.00843024
	TC06002751.hg.1	TC06002751.hg.1	chr6	+	35118455	35132003	30	13548	35118455		NA	NA	TCONS_00011296	NONCODE	-0.00498713
	TC06002828.hg.1	TC06002828.hg.1	chr6	+	52149128	52150390	30	1262	52149128		NA	NA	CR592608	NONCODE	0.0135576
	TC06002850.hg.1	TC06002850.hg.1	chr6	+	64574688	64590494	30	15806	64574688				OTTHUMT00000041090	NONCODE	-0.0165276
	TC06002874.hg.1	TC06002874.hg.1	chr6	+	74681062	74682831	30	1769	74681062		NA	NA	AK056180	NONCODE	0.00905551
	TC06002897.hg.1	TC06002897.hg.1	chr6	+	81128031	81175644	150	47613	81128031		NA	NA	TCONS_00011332;TCONS_00011333;TCONS_00011334;TCONS_00011870;TCONS_00011871;TCONS_00011872;TCONS_00011873;TCONS_00011874;TCONS_00012537	NONCODE;NONCODE;NONCODE;NONCODE;NONCODE;NONCODE;NONCODE;NONCODE;NONCODE	0.00204658
	TC06002968.hg.1	TC06002968.hg.1	chr6	+	107150737	107167451	30	16714	107150737		NA	NA	TCONS_00011913	NONCODE	0.00348698
	TC06003020.hg.1	TC06003020.hg.1	chr6	+	119855041	120010205	46	155164	119855041		NA	NA	TCONS_00011938;TCONS_00011939	NONCODE;NONCODE	-0.0146355
	TC06003032.hg.1	TC06003032.hg.1	chr6	+	125237917	125252884	40	14967	125237917		NA	NA	linc_luo_472	NONCODE	0.00213041
	TC06003049.hg.1	TC06003049.hg.1	chr6	+	131060150	131060616	30	466	131060150				OTTHUMT00000042202	NONCODE	-0.00775386
	TC06003107.hg.1	TC06003107.hg.1	chr6	+	144175206	144177090	30	1884	144175206		AX746989	AX746989	uc003qjt.1	NONCODE	0.0153139
	TC06003201.hg.1	TC06003201.hg.1	chr6	+	167560024	167563500	30	3476	167560024		NA	NA	TCONS_l2_00024523-XLOC_l2_012806	BroadTUCP	-0.00991749
	TC06003298.hg.1	TC06003298.hg.1	chr6	-	1727169	1729106	30	1937	1729106		NA	NA	uc003mtr.2	NONCODE	0.000189911
	TC06003503.hg.1	TC06003503.hg.1	chr6	-	19290550	19321252	30	30702	19321252		NA	NA	TCONS_00011459	NONCODE	-0.00781033
	TC06003547.hg.1	TC06003547.hg.1	chr6	-	27356046	27357004	30	958	27357004		NA	NA	BC029571	NONCODE	0.00654144
	TC06003552.hg.1	TC06003552.hg.1	chr6	-	28088393	28090991	30	2598	28090991		NA	NA	linc_luo_440	NONCODE	0.0115412
	TC06003668.hg.1	TC06003668.hg.1	chr6	-	46833992	46836854	30	2862	46836854				OTTHUMT00000040805	NONCODE	-0.00398324
	TC06003752.hg.1	TC06003752.hg.1	chr6	-	86304945	86314123	70	9178	86314123		NA	NA	linc_luo_465	NONCODE	-0.00720114
	TC06003768.hg.1	TC06003768.hg.1	chr6	-	93432721	93433547	30	826	93433547		NA	NA	TCONS_l2_00025436-XLOC_l2_013064	BroadTUCP	-0.0191872
	TC06003779.hg.1	TC06003779.hg.1	chr6	-	102575603	102580400	30	4797	102580400		NA	NA	TCONS_00012234	NONCODE	0.00488291
	TC06003821.hg.1	TC06003821.hg.1	chr6	-	116061399	116062048	30	649	116062048				OTTHUMT00000041921	NONCODE	-0.00589167
	TC06003850.hg.1	TC06003850.hg.1	chr6	-	132451392	132454497	37	3105	132454497		NA	NA	AK098583;TCONS_00012277	NONCODE;NONCODE	0.00440553
	TC06003892.hg.1	TC06003892.hg.1	chr6	-	140413889	140415734	30	1845	140415734		NA	NA	TCONS_00012805	NONCODE	0.00665903
	TC06003971.hg.1	TC06003971.hg.1	chr6	-	161216349	161228213	30	11864	161228213		NA	NA	TCONS_00012350	NONCODE	0.00325573
	TC06003999.hg.1	TC06003999.hg.1	chr6	-	167647448	167655400	80	7952	167655400		NA	NA	TCONS_00011614;TCONS_00012361;TCONS_00012826	NONCODE;NONCODE;NONCODE	-0.00959357
	TC06004006.hg.1	TC06004006.hg.1	chr6	-	168393506	168397757	72	4251	168397757		NA	NA	TCONS_00011244;TCONS_00011245;TCONS_00011617	NONCODE;NONCODE;NONCODE	0.00325512
	TC07000113.hg.1	TC07000113.hg.1	chr7	+	17414491	17506288	40	91797	17414491		;		ENST00000419463;OTTHUMT00000327606	ENSEMBL;NONCODE	-0.000854346
	TC07000115.hg.1	TC07000115.hg.1	chr7	+	17719173	17720283	30	1110	17719173		;		ENST00000448898;OTTHUMT00000327605	ENSEMBL;NONCODE	-0.017782
	TC07000130.hg.1	TC07000130.hg.1	chr7	+	21420981	21421124	30	143	21420981		RNU1-15P	RNU1-15P	ENST00000353977	ENSEMBL	-0.00407008
	TC07000223.hg.1	TC07000223.hg.1	chr7	+	34932029	34932161	30	132	34932029				ENST00000515993	ENSEMBL	0.00464245
	TC07000296.hg.1	TC07000296.hg.1	chr7	+	46009256	46019790	30	10534	46009256		;		ENST00000416708;OTTHUMT00000340071	ENSEMBL;Havanatranscript	0.00257319
	TC07000333.hg.1	TC07000333.hg.1	chr7	+	55753670	55753774	30	104	55753670		U6;RNU6-389P	U6;RNU6-389P	ENST00000517048;uc022adq.1	ENSEMBL;UCSCGenes	-0.00235074
	TC07000343.hg.1	TC07000343.hg.1	chr7	+	56168352	56168445	30	93	56168352				ENST00000458988	ENSEMBL	-0.0035751
	TC07000347.hg.1	TC07000347.hg.1	chr7	+	57238483	57238551	30	68	57238483		TRNA	TRNA	uc022aee.1	UCSCGenes	0.00352945
	TC10002228.hg.1	TC10002228.hg.1	chr10	+	97051412	97052039	30	627	97051412		NA	NA	TCONS_00018289	NONCODE	0.00083454
	TC10002241.hg.1	TC10002241.hg.1	chr10	+	100995869	100996402	30	533	100995869		NA	NA	TCONS_00018301	NONCODE	0.0126766
	TC07000482.hg.1	TC07000482.hg.1	chr7	+	75803627	75806523	30	2896	75803627				ENST00000437494;AC005077	ENSEMBL;NONCODE	0.00229083
	TC07000502.hg.1	TC07000502.hg.1	chr7	+	78569166	78570211	26	1045	78569166		MAGI2-AS1;MAGI2-AS1	MAGI2-AS1	ENST00000428298;OTTHUMT00000340438	ENSEMBL;Havanatranscript	0.0206556
	TC07000603.hg.1	TC07000603.hg.1	chr7	+	99527015	99546243	30	19228	99527015		;		ENST00000456499;OTTHUMT00000344464	ENSEMBL;Havanatranscript	-0.0295666
	TC07000721.hg.1	TC07000721.hg.1	chr7	+	116073268	116073354	30	86	116073268				ENST00000516863	ENSEMBL	-0.00104786
	TC10002701.hg.1	TC10002701.hg.1	chr10	-	74008148	74008659	30	511	74008659		NA	NA	linc_luo_667	NONCODE	0.0105953
	TC07000958.hg.1	TC07000958.hg.1	chr7	+	144148774	144148910	30	136	144148774		RNU6ATAC40P;U6atac	RNU6ATAC40P;U6atac	ENST00000408580;uc022aok.1	ENSEMBL;UCSCGenes	-0.00113625
	TC07000962.hg.1	TC07000962.hg.1	chr7	+	147528862	147528969	30	107	147528862		RNU6-1184P	RNU6-1184P	ENST00000384588	ENSEMBL	-0.0192339
	TC07001111.hg.1	TC07001111.hg.1	chr7	-	4850819	4850920	30	101	4850920				ENST00000384168	ENSEMBL	0.00510679
	TC07001203.hg.1	TC07001203.hg.1	chr7	-	24236281	24295338	30	59057	24295338		;		ENST00000439839;AC004485;OTTHUMT00000326774	ENSEMBL;NONCODE;NONCODE	-0.0102662
	TC07001775.hg.1	TC07001775.hg.1	chr7	-	115221369	115221496	30	127	115221496		SNORA25;	SNORA25	ENST00000365507;uc022akh.1	ENSEMBL;UCSCGenes	-0.00740314
	TC11000710.hg.1	TC11000710.hg.1	chr11	+	68571597	68571718	30	121	68571597		5S_rRNA	5S_rRNA	uc021qmn.1	UCSCGenes	0.00435549
	TC07001922.hg.1	TC07001922.hg.1	chr7	-	140086581	140086707	30	126	140086707		RNA5SP248	RNA5SP248	ENST00000365602	ENSEMBL	-0.00535841
	TC07001998.hg.1	TC07001998.hg.1	chr7	-	148983533	148983604	30	71	148983604		;SNORD112	SNORD112	ENST00000516748;uc022aow.1	ENSEMBL;UCSCGenes	-0.00752556
	TC07002125.hg.1	TC07002125.hg.1	chr7	+	6087260	6099242	59	11982	6087260		;;		OTTHUMT00000324256;OTTHUMT00000324257;OTTHUMT00000324258	NONCODE;NONCODE;NONCODE	0.00668195
	TC07002212.hg.1	TC07002212.hg.1	chr7	+	27208165	27213403	30	5238	27208165		NA	NA	OTTHUMT00000140062;OTTHUMT00000317667	NONCODE;NONCODE	0.00369965
	TC07002303.hg.1	TC07002303.hg.1	chr7	+	47801074	47806369	35	5295	47801074		NA	NA	TCONS_l2_00025864-XLOC_l2_013393;TCONS_l2_00027114-XLOC_l2_013393	BroadTUCP;BroadTUCP	-0.000941916
	TC07002315.hg.1	TC07002315.hg.1	chr7	+	52492897	52493547	30	650	52492897		NA	NA	TCONS_00013446	NONCODE	0.000118103
	TC07002354.hg.1	TC07002354.hg.1	chr7	+	63498206	63500337	30	2131	63498206		NA	NA	TCONS_00013474	NONCODE	0.0160663
	TC07002430.hg.1	TC07002430.hg.1	chr7	+	77976559	77988768	60	12209	77976559		NA	NA	uc010ldz.2	NONCODE	0.0106632
	TC07002527.hg.1	TC07002527.hg.1	chr7	+	112256535	112257317	30	782	112256535		NA	NA	TCONS_00013564	NONCODE	0.00445784
	TC07002631.hg.1	TC07002631.hg.1	chr7	+	141998745	141999096	30	351	141998745		NA	NA	TCONS_l2_00026248-XLOC_l2_013633	BroadTUCP	-0.00362253
	TC07002690.hg.1	TC07002690.hg.1	chr7	+	153445242	153446094	30	852	153445242		NA	NA	TCONS_00013637	NONCODE	-0.00766592
	TC11001553.hg.1	TC11001553.hg.1	chr11	-	35600978	35606858	40	5880	35606858				ENST00000527684	ENSEMBL	-0.000456335
	TC07002747.hg.1	TC07002747.hg.1	chr7	-	1548291	1549063	30	772	1549063		NA	NA	TCONS_00013116	NONCODE	-0.00393995
	TC07002814.hg.1	TC07002814.hg.1	chr7	-	19132725	19133001	30	276	19133001		NA	NA	Y11180	NONCODE	-0.00911131
	TC07002829.hg.1	TC07002829.hg.1	chr7	-	24215206	24222766	30	7560	24222766		NA	NA	TCONS_00013728	NONCODE	-0.00672452
	TC07002846.hg.1	TC07002846.hg.1	chr7	-	26266058	26284739	30	18681	26284739		NA	NA	TCONS_00013744	NONCODE	-0.00837517
	TC07002858.hg.1	TC07002858.hg.1	chr7	-	27245387	27247372	30	1985	27247372		NA	NA	OTTHUMT00000140107	NONCODE	0.00560579
	TC07002888.hg.1	TC07002888.hg.1	chr7	-	35411878	35414509	30	2631	35414509		NA	NA	TCONS_00013775	NONCODE	-0.00243262
	TC07002891.hg.1	TC07002891.hg.1	chr7	-	35771347	35840234	119	68887	35840234		NA	NA	TCONS_l2_00026506-XLOC_l2_013783;TCONS_l2_00026507-XLOC_l2_013783;TCONS_l2_00026508-XLOC_l2_013783;TCONS_l2_00026509-XLOC_l2_013783;TCONS_l2_00027330-XLOC_l2_013783;TCONS_l2_00027331-XLOC_l2_013783;TCONS_l2_00027332-XLOC_l2_013783	BroadTUCP;BroadTUCP;BroadTUCP;BroadTUCP;BroadTUCP;BroadTUCP;BroadTUCP	0.00925783
	TC07002897.hg.1	TC07002897.hg.1	chr7	-	38391053	38394123	30	3070	38394123		NA	NA	TCONS_l2_00026511-XLOC_l2_013785	BroadTUCP	0.010707
	TC07002951.hg.1	TC07002951.hg.1	chr7	-	54268917	54270114	30	1197	54270114		NA	NA	uc010kzd.1	NONCODE	-0.00469851
	TC07003045.hg.1	TC07003045.hg.1	chr7	-	82323790	82324640	19	850	82324640		NA	NA	TCONS_00013875	NONCODE	-0.00967826
	TC07003054.hg.1	TC07003054.hg.1	chr7	-	87900207	87903065	30	2858	87903065		NA	NA	BC035072	NONCODE	-0.000599507
	TC07003063.hg.1	TC07003063.hg.1	chr7	-	93237404	93375977	110	138573	93375977		NA	NA	linc_luo_489	NONCODE	-0.00276076
	TC07003140.hg.1	TC07003140.hg.1	chr7	-	121283388	121290414	30	7026	121290414		NA	NA	TCONS_00013246	NONCODE	-0.00718685
	TC07003146.hg.1	TC07003146.hg.1	chr7	-	124382366	124384470	30	2104	124384470		NA	NA	AK094700	NONCODE	-0.00163663
	TC07003255.hg.1	TC07003255.hg.1	chr7	-	153220300	153221300	30	1000	153221300		NA	NA	TCONS_00014011	NONCODE	-0.00811651
	TC07003262.hg.1	TC07003262.hg.1	chr7	-	155000224	155001321	30	1097	155001321		NA	NA	TCONS_00014015	NONCODE	0.00372676
	TC08000120.hg.1	TC08000120.hg.1	chr8	+	15379393	15379475	30	82	15379393				ENST00000411282	ENSEMBL	0.00429536
	TC08000121.hg.1	TC08000121.hg.1	chr8	+	15830824	15857833	30	27009	15830824		;		ENST00000517369;OTTHUMT00000375984	ENSEMBL;Havanatranscript	0.00559152
	TC08000229.hg.1	TC08000229.hg.1	chr8	+	28924796	28925971	30	1175	28924796				ENST00000560714	ENSEMBL	0.00100011
	TC08000292.hg.1	TC08000292.hg.1	chr8	+	38279407	38283614	30	4207	38279407				ENST00000528407	ENSEMBL	-8.66e-05
	TC11002586.hg.1	TC11002586.hg.1	chr11	+	18230678	18235486	60	4808	18230678		NA	NA	TCONS_00019074;TCONS_00019075;TCONS_00019076;TCONS_00019862	NONCODE;NONCODE;NONCODE;NONCODE	0.00510719
	TC08000337.hg.1	TC08000337.hg.1	chr8	+	43236787	43237091	30	304	43236787		RN7SKP41	RN7SKP41	ENST00000410698;7SK	ENSEMBL;lncRNADb	0.00651065
	TC08000352.hg.1	TC08000352.hg.1	chr8	+	49826419	49826822	30	403	49826419				ENST00000438521	ENSEMBL	-0.00217676
	TC08000359.hg.1	TC08000359.hg.1	chr8	+	51927581	51927725	30	144	51927581				ENST00000364446	ENSEMBL	-0.000198653
	TC08000369.hg.1	TC08000369.hg.1	chr8	+	54090131	54155243	50	65112	54090131		;		ENST00000524425;ENST00000529837	ENSEMBL;ENSEMBL	-0.00695778
	TC08000537.hg.1	TC08000537.hg.1	chr8	+	87192647	87224465	50	31818	87192647		;		ENST00000523112;OTTHUMT00000374703	ENSEMBL;Havanatranscript	-0.00594355
	TC08000593.hg.1	TC08000593.hg.1	chr8	+	98577745	98577841	30	96	98577745		NA	NA	ENST00000516477	ENSEMBL	0.00717836
	TC11002940.hg.1	TC11002940.hg.1	chr11	+	126219413	126219895	30	482	126219413		NA	NA	AJ227874	NONCODE	0.0111787
	TC08000691.hg.1	TC08000691.hg.1	chr8	+	119294481	119412844	100	118363	119294481		;;;;;;		ENST00000366457;ENST00000430457;OTTHUMT00000132992;OTTHUMT00000132993;OTTHUMT00000132994;OTTHUMT00000132995;OTTHUMT00000132996	ENSEMBL;ENSEMBL;Havanatranscript;Havanatranscript;Havanatranscript;Havanatranscript;Havanatranscript	-0.000430115
	TC08000802.hg.1	TC08000802.hg.1	chr8	+	143171188	143172980	30	1792	143171188				OTTHUMT00000378542	Havanatranscript	0.00501855
	TC08000861.hg.1	TC08000861.hg.1	chr8	+	145925738	145932815	62	7077	145925738		;;;DQ588968	DQ588968	ENST00000524514;ENST00000528794;ENST00000529026;DQ588968;DQ588968;uc022bcq.1	ENSEMBL;ENSEMBL;ENSEMBL;NONCODE;GenBank;UCSCGenes	-3.64e-05
	TC08000888.hg.1	TC08000888.hg.1	chr8	-	1774313	1784348	30	10035	1784348		NA	NA	ENST00000399125;ENST00000399125	ENSEMBL;NONCODE	-0.014421
	TC08000948.hg.1	TC08000948.hg.1	chr8	-	9112859	9117805	30	4946	9117805		;		ENST00000518589;OTTHUMT00000374710	ENSEMBL;Havanatranscript	-0.000185183
	TC08000978.hg.1	TC08000978.hg.1	chr8	-	11415975	11417529	30	1554	11417529				ENST00000533322	ENSEMBL	-0.00705776
	TC08001484.hg.1	TC08001484.hg.1	chr8	-	101843956	101844088	30	132	101844088		RNU4-83P	RNU4-83P	ENST00000410863	ENSEMBL	-0.0170309
	TC08001611.hg.1	TC08001611.hg.1	chr8	-	125948766	125956007	30	7241	125956007				ENST00000531948	ENSEMBL	-0.0121894
	TC16001224.hg.1	TC16001224.hg.1	chr16	-	69742475	69742578	30	103	69742578				ENST00000459361	ENSEMBL	-0.00510939
	TC08001775.hg.1	TC08001775.hg.1	chr8	+	1983386	1983812	30	426	1983386		NA	NA	TCONS_00014579	NONCODE	0.0175487
	TC08001809.hg.1	TC08001809.hg.1	chr8	+	13196083	13200263	30	4180	13196083		BC035181	BC035181	uc003wwo.1	NONCODE	0.00341361
	TC08001825.hg.1	TC08001825.hg.1	chr8	+	19103237	19103881	30	644	19103237		NA	NA	TCONS_00015245	NONCODE	0.00700465
	TC08001861.hg.1	TC08001861.hg.1	chr8	+	29779029	29811121	30	32092	29779029		NA	NA	uc003xhq.3	NONCODE	-0.00706711
	TC08001947.hg.1	TC08001947.hg.1	chr8	+	64128539	64130592	30	2053	64128539		NA	NA	AK172857	NONCODE	-0.00173417
	TC08001969.hg.1	TC08001969.hg.1	chr8	+	71701592	71702501	30	909	71701592		NA	NA	TCONS_00014752	NONCODE	-0.0158974
	TC08002102.hg.1	TC08002102.hg.1	chr8	+	129029972	129031542	30	1570	129029972		NA	NA	BC017718	NONCODE	-0.0237858
	TC08002104.hg.1	TC08002104.hg.1	chr8	+	129611758	129838859	40	227101	129611758		NA	NA	linc_luo_531	NONCODE	-0.0175003
	TC08002121.hg.1	TC08002121.hg.1	chr8	+	135845015	135855171	126	10156	135845015		NA	NA	TCONS_00014866;TCONS_00014867;TCONS_00015371;TCONS_00015372;TCONS_00015373	NONCODE;NONCODE;NONCODE;NONCODE;NONCODE	-0.014555
	TC08002170.hg.1	TC08002170.hg.1	chr8	-	563151	594400	152	31249	594400		AK128400	AK128400	linc_luo_535;uc003wpf.1	NONCODE;NONCODE	0.00726257
	TC08002205.hg.1	TC08002205.hg.1	chr8	-	8150269	8152356	30	2087	8152356		NA	NA	linc_luo_261	NONCODE	-0.012107
	TC08002211.hg.1	TC08002211.hg.1	chr8	-	9412657	9414030	30	1373	9414030		NA	NA	CR590086	NONCODE	0.00178864
	TC08002217.hg.1	TC08002217.hg.1	chr8	-	10436255	10438247	30	1992	10438247		NA	NA	TCONS_00014933	NONCODE	-0.00160382
	TC08002268.hg.1	TC08002268.hg.1	chr8	-	28779448	28922453	18	143005	28922453		NA	NA	ENST00000499250	NONCODE	0.00819628
	TC08002275.hg.1	TC08002275.hg.1	chr8	-	29368979	29371353	30	2374	29371353		NA	NA	TCONS_00014958	NONCODE	-0.0178341
	TC08002276.hg.1	TC08002276.hg.1	chr8	-	30044817	30047775	30	2958	30047775		NA	NA	TCONS_00014557	NONCODE	-0.00446082
	TC08002317.hg.1	TC08002317.hg.1	chr8	-	49221910	49222460	21	550	49222460		NA	NA	TCONS_00014999	NONCODE	0.00468831
	TC08002355.hg.1	TC08002355.hg.1	chr8	-	66504085	66509987	30	5902	66509987		NA	NA	linc_luo_552	NONCODE	-0.00456433
	TC08002452.hg.1	TC08002452.hg.1	chr8	-	102137266	102138373	30	1107	102138373		NA	NA	TCONS_00015115	NONCODE	-0.00529053
	TC08002494.hg.1	TC08002494.hg.1	chr8	-	122654339	122655444	30	1105	122655444		NA	NA	TCONS_00015151	NONCODE	0.00216105
	TC08002520.hg.1	TC08002520.hg.1	chr8	-	128678426	128679911	30	1485	128679911		NA	NA	linc_luo_1998	NONCODE	-0.0152628
	TC09000068.hg.1	TC09000068.hg.1	chr9	+	13446525	13487510	30	40985	13446525		;		ENST00000428006;OTTHUMT00000051737	ENSEMBL;NONCODE	-0.00519621
	TC09000083.hg.1	TC09000083.hg.1	chr9	+	17048917	17112813	30	63896	17048917		;		ENST00000430545;OTTHUMT00000051787	ENSEMBL;Havanatranscript	-0.00118534
	TC09000090.hg.1	TC09000090.hg.1	chr9	+	19073841	19073944	30	103	19073841		RNU6-264P	RNU6-264P	ENST00000517134	ENSEMBL	0.00110406
	TC09000220.hg.1	TC09000220.hg.1	chr9	+	38190404	38190504	30	100	38190404				ENST00000459319	ENSEMBL	0.00874599
	TC09000409.hg.1	TC09000409.hg.1	chr9	+	90745766	90745795	6	29	90745766		DQ587746	DQ587746	DQ587746;DQ587746;uc004apx.1	NONCODE;GenBank;UCSCGenes	-0.00185404
	TC09000473.hg.1	TC09000473.hg.1	chr9	+	98412436	98478000	30	65564	98412436		;		ENST00000422343;OTTHUMT00000053238	ENSEMBL;Havanatranscript	0.0120662
	TC09000563.hg.1	TC09000563.hg.1	chr9	+	114931566	114931677	30	111	114931566				ENST00000363391	ENSEMBL	-0.00730808
	TC09000603.hg.1	TC09000603.hg.1	chr9	+	121502841	121507590	30	4749	121502841		;		ENST00000456032;OTTHUMT00000053813	ENSEMBL;NONCODE	-0.00224548
	TC09000819.hg.1	TC09000819.hg.1	chr9	+	139588588	139588714	30	126	139588588				ENST00000408766	ENSEMBL	-0.0110528
	TC09001085.hg.1	TC09001085.hg.1	chr9	-	37936704	37936765	30	61	37936765		RNU7-124P	RNU7-124P	ENST00000515936	ENSEMBL	0.00618705
	TC09001253.hg.1	TC09001253.hg.1	chr9	-	82483106	82483135	6	29	82483135		DQ570523	DQ570523	DQ570523;DQ570523;uc022biq.1	NONCODE;GenBank;UCSCGenes	0.00578723
	TC09001303.hg.1	TC09001303.hg.1	chr9	-	90536997	90537026	6	29	90537026		DQ578031	DQ578031	DQ578031;DQ578031;uc022bjg.1	NONCODE;GenBank;UCSCGenes	-0.00163229
	TC09001314.hg.1	TC09001314.hg.1	chr9	-	92503174	92504508	30	1334	92504508		;		ENST00000442086;OTTHUMT00000144685	ENSEMBL;NONCODE	0.00157252
	TC09001456.hg.1	TC09001456.hg.1	chr9	-	111633250	111635485	30	2235	111635485		NA	NA	ENST00000443348;OTTHUMT00000053573	ENSEMBL;Havanatranscript	-0.00269829
	TC12002979.hg.1	TC12002979.hg.1	chr12	-	81540319	81540784	30	465	81540784		NA	NA	AF085967	NONCODE	0.000247829
	TC09001836.hg.1	TC09001836.hg.1	chr9	+	15888035	15890761	30	2726	15888035		NA	NA	uc003zmg.2	NONCODE	-0.0137283
	TC09001861.hg.1	TC09001861.hg.1	chr9	+	27829274	27844479	30	15205	27829274		NA	NA	TCONS_00015573-XLOC_007309	RinnlincRNA	-0.00662947
	TC09001887.hg.1	TC09001887.hg.1	chr9	+	35001910	35003660	30	1750	35001910		NA	NA	AK093248	NONCODE	-0.00346421
	TC09001951.hg.1	TC09001951.hg.1	chr9	+	45944184	45949407	30	5223	45944184		NA	NA	TCONS_l2_00028752-XLOC_l2_014804	BroadTUCP	0.00842298
	TC09001959.hg.1	TC09001959.hg.1	chr9	+	65602619	65617663	30	15044	65602619		NA	NA	linc_luo_1751	NONCODE	-0.00154785
	TC09002019.hg.1	TC09002019.hg.1	chr9	+	78194585	78203464	30	8879	78194585		NA	NA	TCONS_00015697	NONCODE	0.0265926
	TC09002070.hg.1	TC09002070.hg.1	chr9	+	91586553	91591213	30	4660	91586553		NA	NA	TCONS_00015704	NONCODE	-0.00576414
	TC09002076.hg.1	TC09002076.hg.1	chr9	+	92170521	92172058	30	1537	92170521		NA	NA	TCONS_00016058	NONCODE	0.00192687
	TC09002157.hg.1	TC09002157.hg.1	chr9	+	108418650	108420264	30	1614	108418650		NA	NA	CR612326	NONCODE	-0.0231384
	TC09002174.hg.1	TC09002174.hg.1	chr9	+	110761849	110769666	30	7817	110761849		NA	NA	TCONS_00016127	NONCODE	0.00145868
	TC09002199.hg.1	TC09002199.hg.1	chr9	+	117541763	117546332	30	4569	117541763		NA	NA	OTTHUMT00000053794	NONCODE	0.0104002
	TC13000249.hg.1	TC13000249.hg.1	chr13	+	62897790	62902966	30	5176	62897790		LINC00459;LINC00459	LINC00459	ENST00000431656;OTTHUMT00000045187	ENSEMBL;Havanatranscript	-0.00186867
	TC09002254.hg.1	TC09002254.hg.1	chr9	+	128172737	128184020	50	11283	128172737		NA	NA	TCONS_00016154;TCONS_00016155;TCONS_00016693	NONCODE;NONCODE;NONCODE	-0.000237923
	TC09002270.hg.1	TC09002270.hg.1	chr9	+	130349340	130354502	30	5162	130349340		NA	NA	linc_luo_1559;TCONS_00016160	NONCODE;NONCODE	-0.00537339
	TC09002276.hg.1	TC09002276.hg.1	chr9	+	130919332	130921896	27	2564	130919332		NA	NA	TCONS_00016167;TCONS_00016706	NONCODE;NONCODE	0.00476573
	TC09002278.hg.1	TC09002278.hg.1	chr9	+	131084558	131087828	30	3270	131084558				OTTHUMT00000054569	NONCODE	0.00257611
	TC09002308.hg.1	TC09002308.hg.1	chr9	+	134430077	134433446	30	3369	134430077		NA	NA	TCONS_l2_00029094-XLOC_l2_015046	BroadTUCP	-0.00465414
	TC09002309.hg.1	TC09002309.hg.1	chr9	+	134691579	134696375	30	4796	134691579		NA	NA	TCONS_00015769	NONCODE	-0.025395
	TC09002343.hg.1	TC09002343.hg.1	chr9	+	138244530	138246066	30	1536	138244530		NA	NA	TCONS_00015774	NONCODE	-0.00225253
	TC09002410.hg.1	TC09002410.hg.1	chr9	-	14611070	14614754	30	3684	14614754		NA	NA	uc003zlh.1	NONCODE	-0.00410576
	TC09002454.hg.1	TC09002454.hg.1	chr9	-	33252469	33253886	30	1417	33253886		NA	NA	BC073955	NONCODE	0.00180786
	TC09002543.hg.1	TC09002543.hg.1	chr9	-	65620353	65623705	30	3352	65623705				OTTHUMT00000143938	NONCODE	0.00229727
	TC09002625.hg.1	TC09002625.hg.1	chr9	-	89834788	89880410	40	45622	89880410		NA	NA	uc004apb.1	NONCODE	0.000190746
	TC09002734.hg.1	TC09002734.hg.1	chr9	-	111892574	111895301	30	2727	111895301		NA	NA	BC040293;uc004bdv.2	NONCODE;NONCODE	-0.000425216
	TC09002788.hg.1	TC09002788.hg.1	chr9	-	127805168	127807307	30	2139	127807307		NA	NA	uc004bpf.1	NONCODE	-0.0120003
	TC09002796.hg.1	TC09002796.hg.1	chr9	-	129841235	129859462	30	18227	129859462				OTTHUMT00000054329	NONCODE	0.0107796
	TC09002809.hg.1	TC09002809.hg.1	chr9	-	131857073	131873070	150	15997	131873070		NA	NA	NR_028048	NONCODE	0.0116499
	TC09002864.hg.1	TC09002864.hg.1	chr9	-	139831621	139832440	30	819	139832440		NA	NA	BC019844	NONCODE	-0.000805597
	TC09002936.hg.1	TC09002936.hg.1	chr9	+	125226304	125231465	30	5161	125226304		NA	NA	ENST00000509547;ENST00000509547	ENSEMBL;NONCODE	-0.00484558
	TC10000075.hg.1	TC10000075.hg.1	chr10	+	9317796	9329020	19	11224	9317796		LINC00709;LINC00709	LINC00709	ENST00000458168;OTTHUMT00000046735	ENSEMBL;NONCODE	-0.00533793
	TC10000106.hg.1	TC10000106.hg.1	chr10	+	13769796	13769916	30	120	13769796		RNA5SP301	RNA5SP301	ENST00000362537	ENSEMBL	0.0176791
	TC10000218.hg.1	TC10000218.hg.1	chr10	+	31548528	31548633	30	105	31548528		RNA5SP309;5S_rRNA	RNA5SP309;5S_rRNA	ENST00000516670;uc021pou.1	ENSEMBL;UCSCGenes	0.0149131
	TC10000235.hg.1	TC10000235.hg.1	chr10	+	35104695	35105314	26	619	35104695		PARD3-AS1;PARD3-AS1	PARD3-AS1	ENST00000446211;OTTHUMT00000047525	ENSEMBL;Havanatranscript	0.0119557
	TC10000346.hg.1	TC10000346.hg.1	chr10	+	52724030	52724980	30	950	52724030		BC044765	BC044765	BC044765;uc001jjl.3	GenBankHTC;UCSCGenes	0.00166234
	TC10000436.hg.1	TC10000436.hg.1	chr10	+	72689682	72691814	30	2132	72689682				ENST00000415746;OTTHUMT00000048530	ENSEMBL;NONCODE	-0.00114774
	TC10000465.hg.1	TC10000465.hg.1	chr10	+	75413858	75434477	30	20619	75413858		NA	NA	ENST00000415661;OTTHUMT00000048712	ENSEMBL;Havanatranscript	-0.00660759
	TC13001492.hg.1	TC13001492.hg.1	chr13	-	49993070	49999586	30	6516	49999586				OTTHUMT00000044966	NONCODE	-0.000287421
	TC10000478.hg.1	TC10000478.hg.1	chr10	+	75788171	75789962	30	1791	75788171		NA	NA	ENST00000426210	ENSEMBL	0.00673014
	TC10000584.hg.1	TC10000584.hg.1	chr10	+	82409553	82413488	30	3935	82409553		;		ENST00000436500;OTTHUMT00000049095	ENSEMBL;NONCODE	-0.001607
	TC13001651.hg.1	TC13001651.hg.1	chr13	-	98929727	98930408	30	681	98930408		NA	NA	AF339801	NONCODE	-0.0115952
	TC10000717.hg.1	TC10000717.hg.1	chr10	+	101779351	101779456	30	105	101779351				ENST00000458964	ENSEMBL	-0.0076864
	TC10000855.hg.1	TC10000855.hg.1	chr10	+	119776998	119804868	40	27870	119776998		;;;		ENST00000417968;ENST00000451610;OTTHUMT00000050586;OTTHUMT00000050587	ENSEMBL;ENSEMBL;Havanatranscript;Havanatranscript	-0.0181437
	TC10001029.hg.1	TC10001029.hg.1	chr10	-	10477912	10504248	50	26336	10504248		NA	NA	ENST00000435106;OTTHUMT00000046741;OTTHUMT00000046741	ENSEMBL;NONCODE;Havanatranscript	-0.000705749
	TC14000425.hg.1	TC14000425.hg.1	chr14	+	70962824	70962927	30	103	70962824		RNU6-659P	RNU6-659P	ENST00000516454	ENSEMBL	0.00357962
	TC10001208.hg.1	TC10001208.hg.1	chr10	-	44396813	44407774	25	10961	44407774		;		ENST00000438454;OTTHUMT00000047735	ENSEMBL;NONCODE	0.00706785
	TC10001215.hg.1	TC10001215.hg.1	chr10	-	45395062	45415668	30	20606	45415668		;		ENST00000436877;OTTHUMT00000047762	ENSEMBL;Havanatranscript	-0.00442589
	TC10001220.hg.1	TC10001220.hg.1	chr10	-	45659676	45676875	30	17199	45676875		;		ENST00000422807;OTTHUMT00000047776	ENSEMBL;Havanatranscript	0.00537526
	TC10001303.hg.1	TC10001303.hg.1	chr10	-	55050832	55070825	30	19993	55070825		;		ENST00000449272;OTTHUMT00000048119	ENSEMBL;NONCODE	-0.00563004
	TC10001307.hg.1	TC10001307.hg.1	chr10	-	56624434	56628882	30	4448	56628882		;		ENST00000414295;OTTHUMT00000291331	ENSEMBL;Havanatranscript	0.00385767
	TC10001339.hg.1	TC10001339.hg.1	chr10	-	68374995	68375096	30	101	68375096				ENST00000459369	ENSEMBL	0.0128947
	TC10001407.hg.1	TC10001407.hg.1	chr10	-	75061539	75061642	30	103	75061642				ENST00000459292	ENSEMBL	-0.000180942
	TC10001967.hg.1	TC10001967.hg.1	chr10	+	29217508	29264218	30	46710	29217508		NA	NA	TCONS_00018147	NONCODE	-0.0132873
	TC10001989.hg.1	TC10001989.hg.1	chr10	+	33247773	33398524	108	150751	33247773		NA	NA	linc_luo_13;TCONS_l2_00002962-XLOC_l2_001537;TCONS_l2_00002963-XLOC_l2_001537;TCONS_l2_00003931-XLOC_l2_001537;TCONS_l2_00003932-XLOC_l2_001537	NONCODE;BroadTUCP;BroadTUCP;BroadTUCP;BroadTUCP	-0.00364177
	TC10002031.hg.1	TC10002031.hg.1	chr10	+	43727898	43729690	15	1792	43727898				OTTHUMT00000047733	NONCODE	-0.000287812
	TC10002054.hg.1	TC10002054.hg.1	chr10	+	47051926	47052306	16	380	47051926		NA	NA	linc_luo_664	NONCODE	0.00356136
	TC10002057.hg.1	TC10002057.hg.1	chr10	+	47656086	47657233	30	1147	47656086		NA	NA	BC031882	NONCODE	-0.00381219
	TC10002073.hg.1	TC10002073.hg.1	chr10	+	53938114	53939568	30	1454	53938114		NA	NA	AK130042	NONCODE	0.0104471
	TC10002080.hg.1	TC10002080.hg.1	chr10	+	60273109	60274558	30	1449	60273109		NA	NA	BC020302	NONCODE	-0.000289161
	TC10002175.hg.1	TC10002175.hg.1	chr10	+	82399533	82403468	20	3935	82399533				OTTHUMT00000049095	NONCODE	0.00365091
	TC10002217.hg.1	TC10002217.hg.1	chr10	+	93335036	93340512	30	5476	93335036		NA	NA	TCONS_00018284	NONCODE	-0.000312754
	TC10002327.hg.1	TC10002327.hg.1	chr10	+	121578786	121588659	60	9873	121578786		NA	NA	NR_003252	NONCODE	-0.00343032
	TC10002350.hg.1	TC10002350.hg.1	chr10	+	126392597	126403327	30	10730	126392597		NA	NA	uc001lhx.2	NONCODE	0.00430214
	TC10002378.hg.1	TC10002378.hg.1	chr10	+	134779038	134789858	30	10820	134779038		NA	NA	TCONS_00017724;TCONS_00017893-XLOC_008677	NONCODE;RinnlincRNA	-0.0148011
	TC10002443.hg.1	TC10002443.hg.1	chr10	-	6162514	6183674	89	21160	6183674		NA	NA	TCONS_l2_00003384-XLOC_l2_001851;TCONS_l2_00003385-XLOC_l2_001851;TCONS_l2_00004096-XLOC_l2_001851;TCONS_l2_00004097-XLOC_l2_001851	BroadTUCP;BroadTUCP;BroadTUCP;BroadTUCP	0.00195744
	TC10002567.hg.1	TC10002567.hg.1	chr10	-	42383279	42391866	30	8587	42391866		NA	NA	TCONS_00017955	NONCODE	0.0291775
	TC10002568.hg.1	TC10002568.hg.1	chr10	-	42388477	42396474	40	7997	42396474		NA	NA	TCONS_00017956-XLOC_008786	RinnlincRNA	0.0230978
	TC10002604.hg.1	TC10002604.hg.1	chr10	-	46780490	46790500	30	10010	46790500		NA	NA	TCONS_l2_00004170-XLOC_l2_001954	BroadTUCP	0.00610914
	TC10002633.hg.1	TC10002633.hg.1	chr10	-	49872244	49880469	30	8225	49880469		NA	NA	TCONS_00017977	NONCODE	-0.00220738
	TC10002655.hg.1	TC10002655.hg.1	chr10	-	55050832	55070825	30	19993	55070825		NA	NA	TCONS_00017984	NONCODE	-0.00405291
	TC14002048.hg.1	TC14002048.hg.1	chr14	-	65708499	65714846	30	6347	65714846		NA	NA	TCONS_00022770	NONCODE	-0.00889964
	TC10002747.hg.1	TC10002747.hg.1	chr10	-	87191699	87192271	30	572	87192271		NA	NA	TCONS_00018013	NONCODE	0.00565549
	TC14002159.hg.1	TC14002159.hg.1	chr14	-	101536824	101539988	40	3164	101539988		NA	NA	TCONS_00022413;TCONS_00022876	NONCODE;NONCODE	-0.00421101
	TC10002922.hg.1	TC10002922.hg.1	chr10	-	135137576	135138249	30	673	135138249		NA	NA	BC027847	NONCODE	0.025251
	TC11000008.hg.1	TC11000008.hg.1	chr11	+	287305	288987	60	1682	287305		;;		ENST00000525217;ENST00000533924;ENST00000534742	ENSEMBL;ENSEMBL;ENSEMBL	-0.00727903
	TC11000269.hg.1	TC11000269.hg.1	chr11	+	23752134	23818516	40	66382	23752134				ENST00000534068	ENSEMBL	-0.00452565
	TC11000752.hg.1	TC11000752.hg.1	chr11	+	71869908	71870905	30	997	71869908				ENST00000542477	ENSEMBL	-0.000359949
	TC11001410.hg.1	TC11001410.hg.1	chr11	-	10420739	10420864	30	125	10420864		RNU6ATAC33P	RNU6ATAC33P	ENST00000408647	ENSEMBL	-0.00105977
	TC11001437.hg.1	TC11001437.hg.1	chr11	-	13848390	13901046	30	52656	13901046				ENST00000530492	ENSEMBL	-0.0230647
	TC11001482.hg.1	TC11001482.hg.1	chr11	-	19612703	19612838	30	135	19612838		SNORA1;	SNORA1	ENST00000384676;uc021qev.1	ENSEMBL;UCSCGenes	-0.00910089
	TC11001493.hg.1	TC11001493.hg.1	chr11	-	21405347	21405455	30	108	21405455		RNA5SP337	RNA5SP337	ENST00000517007	ENSEMBL	0.013438
	TC11001571.hg.1	TC11001571.hg.1	chr11	-	43350298	43380846	40	30548	43380846				ENST00000526220	ENSEMBL	0.00237649
	TC11001606.hg.1	TC11001606.hg.1	chr11	-	45707072	45707111	16	39	45707111		NA	NA	DQ576099;DQ576099;uc021qgs.1	NONCODE;GenBank;UCSCGenes	-0.000513862
	TC11001661.hg.1	TC11001661.hg.1	chr11	-	45723743	45723788	22	45	45723788		DQ585275	DQ585275	DQ585275;DQ585275;uc001naj.2;uc001naj.3	NONCODE;GenBank;NONCODE;UCSCGenes	0.00187463
	TC11001675.hg.1	TC11001675.hg.1	chr11	-	45732389	45732442	30	53	45732442		DQ572425	DQ572425	DQ572425;DQ572425;uc021qhy.1	NONCODE;GenBank;UCSCGenes	-0.0179515
	TC11001799.hg.1	TC11001799.hg.1	chr11	-	57794178	57794284	30	106	57794284		RNU6-899P	RNU6-899P	ENST00000363947	ENSEMBL	-0.00151035
	TC11001978.hg.1	TC11001978.hg.1	chr11	-	66963391	66964638	30	1247	66964638				ENST00000444002	ENSEMBL	0.0133444
	TC11002283.hg.1	TC11002283.hg.1	chr11	-	111597215	111597245	7	30	111597245		DQ599327	DQ599327	DQ599327;DQ599327;uc001plu.1	NONCODE;GenBank;UCSCGenes	-0.00611248
	TC15002539.hg.1	TC15002539.hg.1	chr15	-	52407274	52409155	30	1881	52409155		NA	NA	TCONS_00024123	NONCODE	-0.00557722
	TC11002742.hg.1	TC11002742.hg.1	chr11	+	67653917	67673821	60	19904	67653917		;		ENST00000529069;ENST00000533670;TCONS_00019099;TCONS_00019351;TCONS_00019352;TCONS_00019353	NONCODE;NONCODE;NONCODE;NONCODE;NONCODE;NONCODE	0.00448045
	TC11002796.hg.1	TC11002796.hg.1	chr11	+	77350820	77352358	30	1538	77350820		NA	NA	TCONS_00019400	NONCODE	0.0113037
	TC11002858.hg.1	TC11002858.hg.1	chr11	+	108370157	108372543	30	2386	108370157		NA	NA	TCONS_00019459	NONCODE	0.00226893
	TC11002937.hg.1	TC11002937.hg.1	chr11	+	125976783	125979103	30	2320	125976783		NA	NA	TCONS_00019525	NONCODE	0.00901496
	TC11003143.hg.1	TC11003143.hg.1	chr11	-	45746268	45749273	30	3005	45749273		NA	NA	TCONS_00019631	NONCODE	0.00599976
	TC11003155.hg.1	TC11003155.hg.1	chr11	-	49013021	49023051	30	10030	49023051		NA	NA	TCONS_l2_00005000-XLOC_l2_002648	BroadTUCP	0.00411411
	TC11003180.hg.1	TC11003180.hg.1	chr11	-	61740186	61744174	30	3988	61744174		NA	NA	TCONS_00019645	NONCODE	0.00749823
	TC11003359.hg.1	TC11003359.hg.1	chr11	-	116189130	116189929	30	799	116189929				OTTHUMT00000106282	NONCODE	0.0133309
	TC12000125.hg.1	TC12000125.hg.1	chr12	+	8474472	8482210	50	7738	8474472		;		ENST00000535746;ENST00000539795	ENSEMBL;ENSEMBL	0.00545732
	TC16000980.hg.1	TC16000980.hg.1	chr16	-	27733605	27733713	30	108	27733713				ENST00000364501	ENSEMBL	-0.00840396
	TC12000330.hg.1	TC12000330.hg.1	chr12	+	46051608	46053435	30	1827	46051608		BC053951	BC053951	BC053951;uc001rop.2;uc001rop.3	GenBankHTC;NONCODE;UCSCGenes	-0.00383062
	TC16001268.hg.1	TC16001268.hg.1	chr16	-	74497786	74497886	30	100	74497886				ENST00000384794	ENSEMBL	0.00030281
	TC12000634.hg.1	TC12000634.hg.1	chr12	+	74300720	74313117	30	12397	74300720		;		ENST00000546770;ENST00000546770	ENSEMBL;NONCODE	-0.0176029
	TC12000654.hg.1	TC12000654.hg.1	chr12	+	77773600	77784644	30	11044	77773600				ENST00000552736	ENSEMBL	-0.00109677
	TC12000839.hg.1	TC12000839.hg.1	chr12	+	109132260	109132380	30	120	109132260				ENST00000363190	ENSEMBL	-0.00775755
	TC12001294.hg.1	TC12001294.hg.1	chr12	-	20514666	20523196	30	8530	20523196				ENST00000535755	ENSEMBL	-0.000371996
	TC12001302.hg.1	TC12001302.hg.1	chr12	-	22548022	22551009	30	2987	22551009		;		ENST00000536786;ENST00000536786	ENSEMBL;NONCODE	-0.0139889
	TC12001371.hg.1	TC12001371.hg.1	chr12	-	32068570	32068641	30	71	32068641				ENST00000516775	ENSEMBL	-0.0217726
	TC12001374.hg.1	TC12001374.hg.1	chr12	-	32630316	32630405	30	89	32630405		RNU6-494P	RNU6-494P	ENST00000517254	ENSEMBL	-0.00221673
	TC12001517.hg.1	TC12001517.hg.1	chr12	-	52668431	52672940	30	4509	52672940				ENST00000549788	ENSEMBL	7.64e-05
	TC12001707.hg.1	TC12001707.hg.1	chr12	-	69593909	69593979	30	70	69593979		NA	NA	ENST00000408495	ENSEMBL	0.00777736
	TC12001735.hg.1	TC12001735.hg.1	chr12	-	73597595	73600615	30	3020	73600615		;		ENST00000548029;ENST00000548029	ENSEMBL;NONCODE	-0.00193169
	TC12001808.hg.1	TC12001808.hg.1	chr12	-	92564129	92564229	30	100	92564229				ENST00000363025	ENSEMBL	0.00196687
	TC12001848.hg.1	TC12001848.hg.1	chr12	-	96820978	96821264	30	286	96821264		RN7SKP11;7SK	RN7SKP11;7SK	ENST00000517018;7SK;uc021rcb.1	ENSEMBL;lncRNADb;UCSCGenes	-0.0127761
	TC12002237.hg.1	TC12002237.hg.1	chr12	+	9856673	9861946	30	5273	9856673				ENST00000541404	NONCODE	-0.00415655
	TC12002367.hg.1	TC12002367.hg.1	chr12	+	53553370	53554784	30	1414	53553370				ENST00000550908	NONCODE	0.00673491
	TC12002489.hg.1	TC12002489.hg.1	chr12	+	88189510	88195805	30	6295	88189510				ENST00000551280	NONCODE	0.00617404
	TC12002566.hg.1	TC12002566.hg.1	chr12	+	110318481	110326272	30	7791	110318481				ENST00000446473	NONCODE	0.00120363
	TC12002661.hg.1	TC12002661.hg.1	chr12	+	127544671	127566513	30	21842	127544671		NA	NA	TCONS_00020640	NONCODE	-0.0105343
	TC12002796.hg.1	TC12002796.hg.1	chr12	-	24366190	24715524	140	349334	24715524		;;;;;		ENST00000429944;ENST00000446891;ENST00000456299;ENST00000536729;ENST00000538905;ENST00000540811	NONCODE;NONCODE;NONCODE;NONCODE;NONCODE;NONCODE	-0.00029772
	TC14001438.hg.1	TC14001438.hg.1	chr14	-	92040510	92040956	30	446	92040956		NA	NA	ENST00000498919;uc010aua.2	ENSEMBL;UCSCGenes	0.0200008
	TC12002923.hg.1	TC12002923.hg.1	chr12	-	58475010	58484682	30	9672	58484682		NA	NA	TCONS_00020814	NONCODE	-0.0405059
	TC12003000.hg.1	TC12003000.hg.1	chr12	-	91011536	91016599	30	5063	91016599				ENST00000552470	NONCODE	0.00310145
	TC12003047.hg.1	TC12003047.hg.1	chr12	-	103203061	103218177	50	15116	103218177		NA	NA	TCONS_00020172	NONCODE	-0.00176645
	TC12003050.hg.1	TC12003050.hg.1	chr12	-	103513592	103518106	30	4514	103518106		NA	NA	TCONS_00020900	NONCODE	-0.00354903
	TC12003073.hg.1	TC12003073.hg.1	chr12	-	109154469	109162474	30	8005	109162474		NA	NA	TCONS_00020916	NONCODE	0.0130374
	TC12003116.hg.1	TC12003116.hg.1	chr12	-	119391194	119393930	47	2736	119393930		NA	NA	TCONS_00020947;TCONS_00020948;TCONS_00020949	NONCODE;NONCODE;NONCODE	-0.00123093
	TC12003151.hg.1	TC12003151.hg.1	chr12	-	127214333	127256957	269	42624	127256957		LINC00944;LINC00944;LINC00944;LINC00944;LINC00944;LINC00944	LINC00944	ENST00000536517;ENST00000540684;ENST00000542248;ENST00000544499;ENST00000545508;ENST00000546117;TCONS_00020177;TCONS_00020975;TCONS_00020976;TCONS_00020977;TCONS_00020978;TCONS_00020979;TCONS_00020980-XLOC_010244;TCONS_00020981;TCONS_00020982;TCONS_00021437;TCONS_00021438;TCONS_00021439;TCONS_00021440;TCONS_00021442;uc001uhk.3	NONCODE;NONCODE;NONCODE;NONCODE;NONCODE;NONCODE;NONCODE;NONCODE;NONCODE;NONCODE;NONCODE;NONCODE;RinnlincRNA;NONCODE;NONCODE;NONCODE;NONCODE;NONCODE;NONCODE;NONCODE;NONCODE	0.0029981
	TC12003176.hg.1	TC12003176.hg.1	chr12	-	130949553	130950860	30	1307	130950860		NA	NA	AF052172	NONCODE	0.00863907
	TC12003190.hg.1	TC12003190.hg.1	chr12	-	132241514	132242592	30	1078	132242592		NA	NA	AF087996	NONCODE	-0.00271793
	TC13000067.hg.1	TC13000067.hg.1	chr13	+	26442061	26455095	25	13034	26442061				ENST00000400553	ENSEMBL	-0.0250339
	TC13000118.hg.1	TC13000118.hg.1	chr13	+	34231573	34234065	30	2492	34231573		;		ENST00000452207;OTTHUMT00000044451	ENSEMBL;Havanatranscript	-0.0165825
	TC13000636.hg.1	TC13000636.hg.1	chr13	-	46125620	46125738	30	118	46125738		RNA5SP27	RNA5SP27	ENST00000363839	ENSEMBL	-0.0105572
	TC13000690.hg.1	TC13000690.hg.1	chr13	-	53058296	53058815	30	519	53058815		LINC00345;LINC00345	LINC00345	ENST00000443679;OTTHUMT00000045100	ENSEMBL;NONCODE	0.00774394
	TC17002611.hg.1	TC17002611.hg.1	chr17	-	36959384	36964273	20	4889	36964273		LINC00974	LINC00974	OTTHUMT00000257715	NONCODE	0.00687434
	TC13000752.hg.1	TC13000752.hg.1	chr13	-	78929362	78929463	30	101	78929463		RNY3P3	RNY3P3	ENST00000363816	ENSEMBL	0.0158236
	TC13000864.hg.1	TC13000864.hg.1	chr13	-	107973243	107973311	30	68	107973311		SNORD31;	SNORD31	ENST00000364977;uc021rmj.1	ENSEMBL;UCSCGenes	-0.00400626
	TC13000883.hg.1	TC13000883.hg.1	chr13	-	111796652	111797080	30	428	111797080		ARHGEF7-AS1;ARHGEF7-AS1	ARHGEF7-AS1	ENST00000435037;OTTHUMT00000045798	ENSEMBL;Havanatranscript	-0.00362491
	TC13000990.hg.1	TC13000990.hg.1	chr13	+	30221778	30229578	24	7800	30221778		NA	NA	linc_luo_75	NONCODE	0.013078
	TC13000997.hg.1	TC13000997.hg.1	chr13	+	30890497	30963377	120	72880	30890497		NA	NA	AK092065;linc_luo_760;TCONS_00021744	NONCODE;NONCODE;NONCODE	-0.00247839
	TC13001016.hg.1	TC13001016.hg.1	chr13	+	36432218	36477094	30	44876	36432218		NA	NA	uc001uvi.1	NONCODE	-5.38e-05
	TC18000107.hg.1	TC18000107.hg.1	chr18	+	21798264	21798368	30	104	21798264		RNU6-435P	RNU6-435P	ENST00000384039	ENSEMBL	0.00607388
	TC13001200.hg.1	TC13001200.hg.1	chr13	+	81231053	81270425	30	39372	81231053		NA	NA	TCONS_l2_00006951-XLOC_l2_003803	BroadTUCP	-2.2e-05
	TC13001233.hg.1	TC13001233.hg.1	chr13	+	94287787	94288466	30	679	94287787		NA	NA	AF339790	NONCODE	0.0053302
	TC13001267.hg.1	TC13001267.hg.1	chr13	+	104073592	104080432	47	6840	104073592		NA	NA	TCONS_l2_00006986-XLOC_l2_003840;TCONS_l2_00006987-XLOC_l2_003840;TCONS_l2_00007459-XLOC_l2_003840	BroadTUCP;BroadTUCP;BroadTUCP	-1e-05
	TC13001323.hg.1	TC13001323.hg.1	chr13	+	114920207	114988540	157	68333	114920207		NA	NA	TCONS_00021922;TCONS_l2_00007037-XLOC_l2_003877;TCONS_l2_00007038-XLOC_l2_003877;TCONS_l2_00007040-XLOC_l2_003877;TCONS_l2_00007041-XLOC_l2_003877;TCONS_l2_00007042-XLOC_l2_003877;TCONS_l2_00007043-XLOC_l2_003877	NONCODE;BroadTUCP;BroadTUCP;BroadTUCP;BroadTUCP;BroadTUCP;BroadTUCP	0.00292595
	TC13001417.hg.1	TC13001417.hg.1	chr13	-	33242538	33242992	57	454	33242992		NA	NA	U50539	NONCODE	0.00107979
	TC13001452.hg.1	TC13001452.hg.1	chr13	-	43578514	43609372	30	30858	43609372		LINC00390	LINC00390	OTTHUMT00000044730	NONCODE	-0.0211419
	TC13001493.hg.1	TC13001493.hg.1	chr13	-	49999345	49999977	30	632	49999977		NA	NA	AF087983	NONCODE	-0.00656689
	TC13001583.hg.1	TC13001583.hg.1	chr13	-	77747856	77749650	30	1794	77749650				OTTHUMT00000045358	NONCODE	0.0107462
	TC13001700.hg.1	TC13001700.hg.1	chr13	-	112976881	112985539	30	8658	112985539		NA	NA	TCONS_00021699	NONCODE	0.0135015
	TC14000060.hg.1	TC14000060.hg.1	chr14	+	21078291	21078372	30	81	21078291		TRNA_Leu	TRNA_Leu	uc021rnw.1	UCSCGenes	0.00118013
	TC14000065.hg.1	TC14000065.hg.1	chr14	+	21151432	21151520	30	88	21151432		TRNA_Tyr	TRNA_Tyr	uc021roi.1	UCSCGenes	0.00241379
	TC14000109.hg.1	TC14000109.hg.1	chr14	+	22600515	22600996	30	481	22600515		TCRA;TRAV8-7	TCRA;TRAV8-7	ENST00000390456;AM072814;uc010tmq.1;uc010tmq.2	ENSEMBL;GenBank;NONCODE;UCSCGenes	-0.00588278
	TC18000845.hg.1	TC18000845.hg.1	chr18	-	12228875	12234483	30	5608	12234483		NA	NA	TCONS_00026427	NONCODE	-0.0111927
	TC14000290.hg.1	TC14000290.hg.1	chr14	+	51314840	51332377	19	17537	51314840				ENST00000557152	ENSEMBL	-0.00279149
	TC14000383.hg.1	TC14000383.hg.1	chr14	+	64088478	64088589	30	111	64088478				ENST00000384095	ENSEMBL	-0.00201556
	TC14000661.hg.1	TC14000661.hg.1	chr14	+	101377476	101377554	30	78	101377476		MIR370;Mir_370	MIR370;Mir_370	ENST00000362135;uc021scg.1	ENSEMBL;UCSCGenes	-0.0195035
	TC14000729.hg.1	TC14000729.hg.1	chr14	+	101501266	101501346	30	80	101501266		Mir_154	Mir_154	uc021scv.1	UCSCGenes	0.0108405
	TC14000821.hg.1	TC14000821.hg.1	chr14	+	105235686	105236608	29	922	105235686				ENST00000557223	ENSEMBL	0.0017891
	TC14000870.hg.1	TC14000870.hg.1	chr14	-	20145803	20147175	30	1372	20147175				ENST00000555580	ENSEMBL	0.00356172
	TC14000912.hg.1	TC14000912.hg.1	chr14	-	21581798	21581904	30	106	21581904		RNU6-252P	RNU6-252P	ENST00000363232	ENSEMBL	0.00269486
	TC14000994.hg.1	TC14000994.hg.1	chr14	-	29269290	29299410	40	30120	29299410				ENST00000549013	ENSEMBL	0.000675057
	TC14001409.hg.1	TC14001409.hg.1	chr14	-	88615548	88615577	6	29	88615577		NA	NA	DQ572084;DQ572084;uc021rxt.1	NONCODE;GenBank;UCSCGenes	-0.00114015
	TC14001481.hg.1	TC14001481.hg.1	chr14	-	96709202	96710334	30	1132	96710334		NA	NA	ENST00000554838	ENSEMBL	0.00456953
	TC14001494.hg.1	TC14001494.hg.1	chr14	-	98534577	98671480	30	136903	98671480				ENST00000555776	ENSEMBL	-0.00765374
	TC14001554.hg.1	TC14001554.hg.1	chr14	-	104975962	104978198	30	2236	104978198		NA	NA	uc001you.1;uc001you.1	UCSCGenes;NONCODE	-0.000542438
	TC14001578.hg.1	TC14001578.hg.1	chr14	+	20944648	20945246	30	598	20944648		NA	NA	CR595160	NONCODE	0.0119693
	TC14001590.hg.1	TC14001590.hg.1	chr14	+	22564302	22564896	40	594	22564302		TRD	TRD	uc001wda.1;uc010tmp.1	NONCODE;NONCODE	-0.00330393
	TC14001642.hg.1	TC14001642.hg.1	chr14	+	35433120	35438513	36	5393	35433120		NA	NA	linc_luo_801	NONCODE	-0.00496649
	TC14001651.hg.1	TC14001651.hg.1	chr14	+	36930958	36931579	30	621	36930958		NA	NA	TCONS_00022471	NONCODE	-0.0103829
	TC14001704.hg.1	TC14001704.hg.1	chr14	+	57265363	57266023	20	660	57265363		NA	NA	TCONS_00022519	NONCODE	-0.0188786
	TC14001807.hg.1	TC14001807.hg.1	chr14	+	89991327	89995002	64	3675	89991327		LINC00642;LINC00642;LINC00642	LINC00642	OTTHUMT00000313930;OTTHUMT00000313931;OTTHUMT00000313932	NONCODE;NONCODE;NONCODE	0.00452533
	TC14001816.hg.1	TC14001816.hg.1	chr14	+	93357747	93359851	70	2104	93357747		NA	NA	TCONS_00022353;TCONS_00022604;TCONS_00023035;TCONS_00023036	NONCODE;NONCODE;NONCODE;NONCODE	-0.0147056
	TC14001827.hg.1	TC14001827.hg.1	chr14	+	96107825	96108855	30	1030	96107825		NA	NA	TCONS_00022616	NONCODE	0.000373426
	TC14001948.hg.1	TC14001948.hg.1	chr14	-	29445042	29448130	28	3088	29448130				ENST00000552028	NONCODE	-0.00418818
	TC14001953.hg.1	TC14001953.hg.1	chr14	-	30166405	30170138	30	3733	30170138		NA	NA	BC044788	NONCODE	0.00520964
	TC14001977.hg.1	TC14001977.hg.1	chr14	-	38365265	38371329	30	6064	38371329		NA	NA	TCONS_00022365	NONCODE	0.00388215
	TC14001988.hg.1	TC14001988.hg.1	chr14	-	45234277	45237334	44	3057	45237334		NA	NA	TCONS_00022730;TCONS_00022731	NONCODE;NONCODE	-0.00492526
	TC14001997.hg.1	TC14001997.hg.1	chr14	-	50328594	50331183	30	2589	50331183		NA	NA	TCONS_00022740	NONCODE	-0.00540931
	TC14002094.hg.1	TC14002094.hg.1	chr14	-	77352715	77371404	30	18689	77371404		NA	NA	TCONS_l2_00008156-XLOC_l2_004466	BroadTUCP	-0.00169006
	TC15000004.hg.1	TC15000004.hg.1	chr15	+	20549989	20564419	30	14430	20549989		;		ENST00000554815;ENST00000556397	ENSEMBL;ENSEMBL	0.00164947
	TC15000191.hg.1	TC15000191.hg.1	chr15	+	30965953	30966046	30	93	30965953				ENST00000384119	ENSEMBL	0.0251456
	TC15000197.hg.1	TC15000197.hg.1	chr15	+	31508224	31516648	30	8424	31508224				ENST00000557928	ENSEMBL	-0.0271133
	TC15000239.hg.1	TC15000239.hg.1	chr15	+	34812855	34812880	2	25	34812855		DQ570464	DQ570464	DQ570464;DQ570464;uc021siw.1	NONCODE;GenBank;UCSCGenes	-0.00255723
	TC15000261.hg.1	TC15000261.hg.1	chr15	+	38795054	38797182	30	2128	38795054				ENST00000560231	ENSEMBL	-0.00717932
	TC15000345.hg.1	TC15000345.hg.1	chr15	+	45135810	45135922	30	112	45135810				ENST00000459006	ENSEMBL	-0.00119042
	TC15000398.hg.1	TC15000398.hg.1	chr15	+	51038906	51042026	30	3120	51038906				ENST00000558317	ENSEMBL	0.00155754
	TC15000404.hg.1	TC15000404.hg.1	chr15	+	51600434	51614193	30	13759	51600434				ENST00000559672	ENSEMBL	-0.0128387
	TC15000434.hg.1	TC15000434.hg.1	chr15	+	57138538	57138804	30	266	57138538				ENST00000325778	ENSEMBL	0.023819
	TC15000483.hg.1	TC15000483.hg.1	chr15	+	62531273	62531303	7	30	62531273		DQ598244;DQ598244	DQ598244	DQ598244;DQ598244;uc002ahy.2;uc002ahy.2	NONCODE;GenBank;UCSCGenes;NONCODE	-0.0127131
	TC15000568.hg.1	TC15000568.hg.1	chr15	+	62548180	62548241	30	61	62548180		DQ570108	DQ570108	DQ570108;DQ570108;uc021sos.1	NONCODE;GenBank;UCSCGenes	-7.43e-05
	TC15000889.hg.1	TC15000889.hg.1	chr15	+	93126290	93126324	11	34	93126290		DQ601873;DQ601873	DQ601873	DQ601873;DQ601873;uc010uqw.1;uc010uqw.1	NONCODE;GenBank;UCSCGenes;NONCODE	0.0115107
	TC15000896.hg.1	TC15000896.hg.1	chr15	+	93128269	93128301	9	32	93128269		DQ595407	DQ595407	DQ595407;DQ595407;uc021sve.1	NONCODE;GenBank;UCSCGenes	0.00918246
	TC15000977.hg.1	TC15000977.hg.1	chr15	+	101874642	101877633	30	2991	101874642				ENST00000558696	ENSEMBL	-0.00303888
	TC15001041.hg.1	TC15001041.hg.1	chr15	-	22448276	22448786	30	510	22448786		AJ004954	AJ004954	AJ004954;uc021sff.1	GenBank;UCSCGenes	-6.9e-07
	TC15001292.hg.1	TC15001292.hg.1	chr15	-	44679518	44682649	30	3131	44682649				ENST00000559034	ENSEMBL	-0.00499991
	TC15001363.hg.1	TC15001363.hg.1	chr15	-	51542454	51542483	6	29	51542483		DQ598506;DQ598506	DQ598506	DQ598506;DQ598506;uc001zzf.1;uc001zzf.1	NONCODE;GenBank;UCSCGenes;NONCODE	0.017754
	TC15001397.hg.1	TC15001397.hg.1	chr15	-	51582800	51582837	14	37	51582837		DQ588253;DQ588253	DQ588253	DQ588253;DQ588253;uc002aac.2;uc002aac.2	NONCODE;GenBank;UCSCGenes;NONCODE	-0.0108752
	TC15001399.hg.1	TC15001399.hg.1	chr15	-	51583223	51583274	28	51	51583274		DQ601543	DQ601543	DQ601543;DQ601543;uc002aae.2;uc002aae.3	NONCODE;GenBank;NONCODE;UCSCGenes	0.00779334
	TC15001488.hg.1	TC15001488.hg.1	chr15	-	59052665	59052880	30	215	59052880		U3;	U3	ENST00000363448;uc021smx.1	ENSEMBL;UCSCGenes	0.0149167
	TC15001526.hg.1	TC15001526.hg.1	chr15	-	62515076	62515109	10	33	62515109		DQ596663	DQ596663	DQ596663;DQ596663;uc021snr.1	NONCODE;GenBank;UCSCGenes	-0.0131812
	TC15001716.hg.1	TC15001716.hg.1	chr15	-	80109691	80109792	30	101	80109792		U6;RNU6-667P	U6;RNU6-667P	ENST00000517186;uc021sro.1	ENSEMBL;UCSCGenes	0.00586624
	TC20000936.hg.1	TC20000936.hg.1	chr20	-	49187512	49194578	30	7066	49194578		;		ENST00000431019;OTTHUMT00000257952	ENSEMBL;Havanatranscript	-0.00292438
	TC15001795.hg.1	TC15001795.hg.1	chr15	-	85857898	85858747	30	849	85858747		ADAMTS7P4	ADAMTS7P4	ENST00000558015	ENSEMBL	-0.00317875
	TC15001804.hg.1	TC15001804.hg.1	chr15	-	86293567	86296132	30	2565	86296132				ENST00000558637	ENSEMBL	0.0120818
	TC15001809.hg.1	TC15001809.hg.1	chr15	-	86716429	86716501	30	72	86716501				ENST00000363336	ENSEMBL	0.000713072
	TC20001109.hg.1	TC20001109.hg.1	chr20	+	13093137	13095336	30	2199	13093137		NA	NA	AK023590	NONCODE	-0.00402313
	TC15001954.hg.1	TC15001954.hg.1	chr15	-	97323978	97324014	13	36	97324014		DQ596112	DQ596112	DQ596112;DQ596112;uc021swx.1	NONCODE;GenBank;UCSCGenes	0.0148081
	TC20001152.hg.1	TC20001152.hg.1	chr20	+	22897186	22954843	30	57657	22897186		NA	NA	CR618492	NONCODE	-0.0052939
	TC15002081.hg.1	TC15002081.hg.1	chr15	+	24470891	24525611	116	54720	24470891		NA	NA	TCONS_00023305;TCONS_00023306;TCONS_00023859;TCONS_00023860;TCONS_00023861;TCONS_00023862;TCONS_00023863;TCONS_00023864	NONCODE;NONCODE;NONCODE;NONCODE;NONCODE;NONCODE;NONCODE;NONCODE	0.00615897
	TC15002120.hg.1	TC15002120.hg.1	chr15	+	30799598	30808898	100	9300	30799598		NA	NA	TCONS_l2_00008524-XLOC_l2_004601;TCONS_l2_00008525-XLOC_l2_004601;TCONS_l2_00008526-XLOC_l2_004601;TCONS_l2_00008527-XLOC_l2_004601	BroadTUCP;BroadTUCP;BroadTUCP;BroadTUCP	0.0115103
	TC15002200.hg.1	TC15002200.hg.1	chr15	+	52369355	52372524	30	3169	52369355		NA	NA	linc_luo_1446	NONCODE	-0.00558342
	TC15002312.hg.1	TC15002312.hg.1	chr15	+	80658932	80659521	30	589	80658932		AB240015	AB240015	uc002bfp.1	NONCODE	-0.00654017
	TC15002354.hg.1	TC15002354.hg.1	chr15	+	89902072	89903608	30	1536	89902072		NA	NA	CR596660	NONCODE	0.00694
	TC15002390.hg.1	TC15002390.hg.1	chr15	+	96533823	96795377	30	261554	96533823		NA	NA	TCONS_00023538	NONCODE	0.00481114
	TC20001614.hg.1	TC20001614.hg.1	chr20	-	46845008	46860369	30	15361	46860369		NA	NA	TCONS_00028423	NONCODE	0.00413032
	TC15002459.hg.1	TC15002459.hg.1	chr15	-	30121815	30261051	30	139236	30261051		NA	NA	TCONS_l2_00008966-XLOC_l2_004857	BroadTUCP	-0.000344401
	TC15002575.hg.1	TC15002575.hg.1	chr15	-	64762013	64784651	140	22638	64784651		NA	NA	linc_luo_856	NONCODE	-0.00586007
	TC15002601.hg.1	TC15002601.hg.1	chr15	-	70264901	70316821	60	51920	70316821		NA	NA	TCONS_00023723;TCONS_00023724	NONCODE;NONCODE	-0.00649758
	TC21000046.hg.1	TC21000046.hg.1	chr21	+	18803865	18803965	30	100	18803865		RNU6-113P	RNU6-113P	ENST00000516653	ENSEMBL	-0.00218119
	TC15002636.hg.1	TC15002636.hg.1	chr15	-	77516252	77517746	30	1494	77517746		NA	NA	uc002bcp.3	NONCODE	-0.0204313
	TC15002641.hg.1	TC15002641.hg.1	chr15	-	78285576	78286567	30	991	78286567		NA	NA	uc010umr.1	NONCODE	0.0310661
	TC15002691.hg.1	TC15002691.hg.1	chr15	-	89036647	89040949	30	4302	89040949		NA	NA	linc_luo_866	NONCODE	0.0041014
	TC15002724.hg.1	TC15002724.hg.1	chr15	-	96888277	96896503	30	8226	96896503		NA	NA	linc_luo_870	NONCODE	0.00216104
	TC21000256.hg.1	TC21000256.hg.1	chr21	+	47640183	47641992	30	1809	47640183		;		ENST00000418029;OTTHUMT00000207253	ENSEMBL;Havanatranscript	-0.0139263
	TC16000244.hg.1	TC16000244.hg.1	chr16	+	22308461	22308542	30	81	22308461		TRNA_Leu;TRNA	TRNA_Leu;TRNA	uc021tet.1;uc021teu.1	UCSCGenes;UCSCGenes	0.00183049
	TC21000615.hg.1	TC21000615.hg.1	chr21	+	23470936	23488847	60	17911	23470936		NA	NA	TCONS_00028765	NONCODE	0.0117938
	TC16000388.hg.1	TC16000388.hg.1	chr16	+	32077386	32077674	30	288	32077386		IGHV3OR16-9;IGH	IGHV3OR16-9;IGH	ENST00000354689;AJ556643;EU620014;uc010vft.1;uc010vft.2;uc010vfu.1;uc010vfu.2	ENSEMBL;GenBank;GenBank;NONCODE;UCSCGenes;NONCODE;UCSCGenes	-0.00363498
	TC16000396.hg.1	TC16000396.hg.1	chr16	+	33006369	33006839	30	470	33006369		IGHV3OR16-10	IGHV3OR16-10	ENST00000425181	ENSEMBL	-0.00650366
	TC16000407.hg.1	TC16000407.hg.1	chr16	+	34968764	34968875	30	111	34968764		RNA5SP406	RNA5SP406	ENST00000516106	ENSEMBL	0.0107566
	TC22000001.hg.1	TC22000001.hg.1	chr22	+	16062157	16063236	30	1079	16062157		;		ENST00000424770;OTTHUMT00000276574	ENSEMBL;Havanatranscript	0.0154339
	TC22000026.hg.1	TC22000026.hg.1	chr22	+	18215566	18217980	30	2414	18215566		DQ570096	DQ570096	DQ570096;DQ570096;uc002znb.3	NONCODE;GenBank;UCSCGenes	0.0123391
	TC16001054.hg.1	TC16001054.hg.1	chr16	-	31278758	31278812	30	54	31278812		RNU7-199P	RNU7-199P	ENST00000517067	ENSEMBL	0.0103863
	TC16001372.hg.1	TC16001372.hg.1	chr16	+	783055	785525	30	2470	783055		NA	NA	AK092097	NONCODE	0.000938727
	TC16001397.hg.1	TC16001397.hg.1	chr16	+	4838398	4846282	90	7884	4838398		NA	NA	NR_029453;NR_029454;NR_029455	NONCODE;NONCODE;NONCODE	0.0134148
	TC16001584.hg.1	TC16001584.hg.1	chr16	+	58963575	59233253	30	269678	58963575		NA	NA	TCONS_l2_00009776-XLOC_l2_005246	BroadTUCP	-0.00400271
	TC16001622.hg.1	TC16001622.hg.1	chr16	+	71496181	71499844	30	3663	71496181				ENST00000500612	NONCODE	0.00180417
	TC16001630.hg.1	TC16001630.hg.1	chr16	+	72823142	72825522	30	2380	72823142		NA	NA	AK125142	NONCODE	0.00383533
	TC16001653.hg.1	TC16001653.hg.1	chr16	+	79539486	79550170	30	10684	79539486		NA	NA	TCONS_00024474	NONCODE	-0.000419838
	TC16001736.hg.1	TC16001736.hg.1	chr16	-	1041085	1043057	30	1972	1043057		NA	NA	TCONS_00024536	NONCODE	0.00162159
	TC16001751.hg.1	TC16001751.hg.1	chr16	-	3160462	3165599	30	5137	3165599		NA	NA	ENST00000506353	NONCODE	-0.000654117
	TC16001787.hg.1	TC16001787.hg.1	chr16	-	17176152	17178906	30	2754	17178906		NA	NA	AF461810	NONCODE	-0.00137923
	TC17000135.hg.1	TC17000135.hg.1	chr17	+	8124866	8124937	30	71	8124866		TRNA_Gly	TRNA_Gly	uc021tpz.1	UCSCGenes	-0.0225993
	TC17000139.hg.1	TC17000139.hg.1	chr17	+	8232901	8233037	30	136	8232901				ENST00000390904	ENSEMBL	-0.0112988
	TC18000933.hg.1	TC18000933.hg.1	chr18	-	53440548	53448952	70	8404	53448952		NA	NA	TCONS_00026208;TCONS_00026525;TCONS_00026526	NONCODE;NONCODE;NONCODE	-0.0030175
	TC17000267.hg.1	TC17000267.hg.1	chr17	+	20448630	20448669	16	39	20448630		DQ583069	DQ583069	DQ583069;DQ583069;uc021tsh.1	NONCODE;GenBank;UCSCGenes	0.00158315
	TC20001215.hg.1	TC20001215.hg.1	chr20	+	38093641	38105945	30	12304	38093641				OTTHUMT00000079228	NONCODE	-0.00127877
	TC17000843.hg.1	TC17000843.hg.1	chr17	+	73031208	73031280	30	72	73031208		TRNA_Arg	TRNA_Arg	uc021ucu.1	UCSCGenes	-0.00993554
	TC17001113.hg.1	TC17001113.hg.1	chr17	-	8221406	8222030	30	624	8222030		;		ENST00000458568;OTTHUMT00000256340	ENSEMBL;Havanatranscript	0.00193022
	TC17001868.hg.1	TC17001868.hg.1	chr17	-	73030526	73030598	30	72	73030598		TRNA_Arg	TRNA_Arg	uc021uct.1	UCSCGenes	0.00286857
	TC17002208.hg.1	TC17002208.hg.1	chr17	+	40346647	40348097	30	1450	40346647		NA	NA	TCONS_00025392	NONCODE	0.00408756
	TC17002267.hg.1	TC17002267.hg.1	chr17	+	48074253	48094208	30	19955	48074253		NA	NA	TCONS_00025183	NONCODE	-0.0105664
	TC19001961.hg.1	TC19001961.hg.1	chr19	+	7937139	7938035	30	896	7937139		NA	NA	BC040706	NONCODE	0.00152371
	TC19002087.hg.1	TC19002087.hg.1	chr19	+	32593958	32595603	40	1645	32593958		NA	NA	TCONS_00026991;TCONS_00026992	NONCODE;NONCODE	0.00584436
	TC17002506.hg.1	TC17002506.hg.1	chr17	-	15317202	15319513	30	2311	15319513		NA	NA	TCONS_00025573	NONCODE	0.0106047
	TC17002556.hg.1	TC17002556.hg.1	chr17	-	21359825	21363527	30	3702	21363527		NA	NA	AK054761	NONCODE	0.00424742
	TC17002590.hg.1	TC17002590.hg.1	chr17	-	34220711	34236953	30	16242	34236953		NA	NA	uc010ctx.1	NONCODE	-0.00781137
	TC17002757.hg.1	TC17002757.hg.1	chr17	-	65760074	65761939	29	1865	65761939		NA	NA	TCONS_00025738	NONCODE	0.00240148
	TC17002780.hg.1	TC17002780.hg.1	chr17	-	72052482	72109041	112	56559	72109041		NA	NA	TCONS_00025762;TCONS_00025763;TCONS_00026157;TCONS_00026158;TCONS_00026159	NONCODE;NONCODE;NONCODE;NONCODE;NONCODE	-0.00474459
	TC17002797.hg.1	TC17002797.hg.1	chr17	-	75718954	75724641	30	5687	75724641		NA	NA	TCONS_00025254	NONCODE	0.00209266
	TC18000244.hg.1	TC18000244.hg.1	chr18	+	70419187	70419286	30	99	70419187		RNA5SP460	RNA5SP460	ENST00000516789	ENSEMBL	-0.0189203
	TC18000330.hg.1	TC18000330.hg.1	chr18	-	11655825	11655865	17	40	11655865		DQ572814	DQ572814	DQ572814;DQ572814;uc021ugz.1	NONCODE;GenBank;UCSCGenes	-0.00623092
	TC22001072.hg.1	TC22001072.hg.1	chr22	+	31831223	31834552	30	3329	31831223		AK074476	AK074476	uc003akv.1	NONCODE	-1.62e-05
	TC18000568.hg.1	TC18000568.hg.1	chr18	-	68047378	68243317	30	195939	68243317		NA	NA	ENST00000511515;ENST00000511515	ENSEMBL;NONCODE	-0.00419408
	TC18000723.hg.1	TC18000723.hg.1	chr18	+	54697181	54711425	40	14244	54697181		NA	NA	TCONS_00026339;TCONS_00026628	NONCODE;NONCODE	-0.00151856
	TC18000764.hg.1	TC18000764.hg.1	chr18	+	68423514	68438194	30	14680	68423514		NA	NA	TCONS_00026358	NONCODE	0.00374802
	TC18000775.hg.1	TC18000775.hg.1	chr18	+	72259010	72260590	30	1580	72259010		NA	NA	linc_luo_917	NONCODE	-0.00530185
	TC18000781.hg.1	TC18000781.hg.1	chr18	+	74277425	74323162	30	45737	74277425		NA	NA	TCONS_00026377	NONCODE	-0.0134861
	TC18000893.hg.1	TC18000893.hg.1	chr18	-	33552114	33553879	30	1765	33553879		NA	NA	AX748072	NONCODE	0.0183491
	TC18000913.hg.1	TC18000913.hg.1	chr18	-	42157985	42159894	30	1909	42159894		NA	NA	TCONS_00026506	NONCODE	0.0137857
	TC18000916.hg.1	TC18000916.hg.1	chr18	-	44247785	44256829	30	9044	44256829		AK095045	AK095045	AK054755;uc002lch.1	NONCODE;NONCODE	0.00283362
	TC19000093.hg.1	TC19000093.hg.1	chr19	+	4724082	4724153	30	71	4724082		TRNA_Gly	TRNA_Gly	uc021unh.1	UCSCGenes	-0.0401829
	TC20000977.hg.1	TC20000977.hg.1	chr20	-	56130115	56134053	30	3938	56134053		NA	NA	ENST00000503777	ENSEMBL	0.00307572
	TC21000746.hg.1	TC21000746.hg.1	chr21	+	43459225	43475216	34	15991	43459225		NA	NA	TCONS_00029031;TCONS_00029032	NONCODE;NONCODE	-0.00701437
	TC21000771.hg.1	TC21000771.hg.1	chr21	+	45894774	45899251	50	4477	45894774		NA	NA	TCONS_l2_00017094-XLOC_l2_009105;TCONS_l2_00017095-XLOC_l2_009105	BroadTUCP;BroadTUCP	0.00079696
	TC20001459.hg.1	TC20001459.hg.1	chr20	-	19189995	19190824	30	829	19190824		NA	NA	TCONS_00028327	NONCODE	-0.00427623
	TC20001651.hg.1	TC20001651.hg.1	chr20	-	52873712	52904357	30	30645	52904357		NA	NA	TCONS_00028444	NONCODE	-0.000361125
	TC19000890.hg.1	TC19000890.hg.1	chr19	+	55701076	55704597	30	3521	55701076		BC034929	BC034929	BC034929;uc002qjr.3	NONCODE;UCSCGenes	0.0219883
	TC21000030.hg.1	TC21000030.hg.1	chr21	+	16134031	16135411	30	1380	16134031		NA	NA	ENST00000435315;OTTHUMT00000157919	ENSEMBL;NONCODE	-0.00226965
	TC19001056.hg.1	TC19001056.hg.1	chr19	-	4041127	4043154	30	2027	4043154				ENST00000535853	ENSEMBL	0.00195996
	TC21000499.hg.1	TC21000499.hg.1	chr21	-	44384749	44385473	30	724	44385473		;		ENST00000428410;OTTHUMT00000195552	ENSEMBL;Havanatranscript	-0.0219986
	TC21000604.hg.1	TC21000604.hg.1	chr21	+	20616277	20633315	30	17038	20616277		NA	NA	TCONS_l2_00016983-XLOC_l2_008996	BroadTUCP	-0.00114091
	TC19001547.hg.1	TC19001547.hg.1	chr19	-	41285685	41302848	30	17163	41302848		NA	NA	ENST00000511958;ENST00000511958	ENSEMBL;NONCODE	0.0164843
	TC21000649.hg.1	TC21000649.hg.1	chr21	+	30565801	30660526	80	94725	30565801		NA	NA	TCONS_l2_00017003-XLOC_l2_009028;TCONS_l2_00017367-XLOC_l2_009028;TCONS_l2_00017368-XLOC_l2_009028;TCONS_l2_00017369-XLOC_l2_009028;TCONS_l2_00017370-XLOC_l2_009028;uc002yni.2	BroadTUCP;BroadTUCP;BroadTUCP;BroadTUCP;BroadTUCP;NONCODE	-0.00460838
	TC19001989.hg.1	TC19001989.hg.1	chr19	+	12561749	12571519	30	9770	12561749		NA	NA	TCONS_00026825	NONCODE	0.0103007
	TC19002070.hg.1	TC19002070.hg.1	chr19	+	29493462	29504862	50	11400	29493462		LOC100505835	LOC100505835	uc002nsc.1	NONCODE	0.00890931
	TC19002073.hg.1	TC19002073.hg.1	chr19	+	29931964	29934368	30	2404	29931964		NA	NA	TCONS_00026981	NONCODE	-0.0229177
	TC19002131.hg.1	TC19002131.hg.1	chr19	+	40128254	40133041	60	4787	40128254		NA	NA	TCONS_l2_00012541-XLOC_l2_006729;TCONS_l2_00012542-XLOC_l2_006729;TCONS_l2_00013325-XLOC_l2_006729	BroadTUCP;BroadTUCP;BroadTUCP	-0.00305572
	TC19002135.hg.1	TC19002135.hg.1	chr19	+	40780649	40784243	30	3594	40780649				OTTHUMT00000109475	NONCODE	0.00475758
	TC20000585.hg.1	TC20000585.hg.1	chr20	-	4409711	4412358	50	2647	4412358		BC039673;;	BC039673	ENST00000448825;BC039673;BC039673;OTTHUMT00000077814;uc002wks.3	ENSEMBL;NONCODE;GenBank;NONCODE;UCSCGenes	-0.000605831
	TC19002150.hg.1	TC19002150.hg.1	chr19	+	43158078	43173162	17	15084	43158078		NA	NA	TCONS_l2_00012563-XLOC_l2_006745	BroadTUCP	-0.00371994
	TC19002280.hg.1	TC19002280.hg.1	chr19	-	1246146	1248229	60	2083	1248229		NA	NA	TCONS_00027154;TCONS_00027655	NONCODE;NONCODE	0.00334552
	TC19002365.hg.1	TC19002365.hg.1	chr19	-	15962877	15965591	30	2714	15965591		NA	NA	TCONS_l2_00012889-XLOC_l2_006939	BroadTUCP	-0.00191609
	TC19002492.hg.1	TC19002492.hg.1	chr19	-	43057348	43057999	30	651	43057999		NA	NA	TCONS_l2_00013121-XLOC_l2_007057	BroadTUCP	-0.000467325
	TC22000577.hg.1	TC22000577.hg.1	chr22	-	24240745	24240774	6	29	24240774		DQ597394	DQ597394	DQ597394;DQ597394;uc021wna.1	NONCODE;GenBank;UCSCGenes	0.00267585
	TC22000665.hg.1	TC22000665.hg.1	chr22	-	31618731	31618839	30	108	31618839		RNU6-1128P	RNU6-1128P	ENST00000362825	ENSEMBL	0.0144196
	TC22000679.hg.1	TC22000679.hg.1	chr22	-	32723158	32739092	30	15934	32739092		;		ENST00000446543;OTTHUMT00000129026	ENSEMBL;NONCODE	0.0102224
	TC20000367.hg.1	TC20000367.hg.1	chr20	+	45487972	45488311	30	339	45487972		RN7SKP33	RN7SKP33	ENST00000410942;7SK	ENSEMBL;lncRNADb	0.000761679
	TC20000415.hg.1	TC20000415.hg.1	chr20	+	51288456	51307468	111	19012	51288456		;;;;;;;;;;;		ENST00000413070;ENST00000421642;ENST00000422666;ENST00000425279;ENST00000437987;ENST00000448013;OTTHUMT00000079752;OTTHUMT00000079753;OTTHUMT00000259161;OTTHUMT00000259162;OTTHUMT00000259163;OTTHUMT00000259164	ENSEMBL;ENSEMBL;ENSEMBL;ENSEMBL;ENSEMBL;ENSEMBL;NONCODE;NONCODE;NONCODE;NONCODE;NONCODE;NONCODE	-0.000439113
	TC20000464.hg.1	TC20000464.hg.1	chr20	+	57285851	57286689	30	838	57285851				ENST00000530479	ENSEMBL	0.00474018
	TC20000562.hg.1	TC20000562.hg.1	chr20	-	2454889	2455853	30	964	2455853		AK126717;AK126717	AK126717	AK126717;uc002wgc.1;uc002wgc.1	GenBank;UCSCGenes;NONCODE	-0.0182266
	TC21000333.hg.1	TC21000333.hg.1	chr21	-	26825507	26839042	60	13535	26839042		NA	NA	ENST00000465390;ENST00000467945;ENST00000468736;ENST00000489205	ENSEMBL;ENSEMBL;ENSEMBL;ENSEMBL	-0.000962629
	TC20000966.hg.1	TC20000966.hg.1	chr20	-	54780108	54780229	30	121	54780229		RNA5SP487;5S_rRNA	RNA5SP487;5S_rRNA	ENST00000410186;uc021wfa.1	ENSEMBL;UCSCGenes	0.0248113
	TC22001005.hg.1	TC22001005.hg.1	chr22	+	22735428	23247213	35	511785	22735428		NA	NA	Y12722;Z15107;Z46850	NONCODE;NONCODE;NONCODE	-0.00293928
	TC20001097.hg.1	TC20001097.hg.1	chr20	+	10160883	10166423	30	5540	10160883		NA	NA	TCONS_00027901	NONCODE	0.00598078
	TC20001217.hg.1	TC20001217.hg.1	chr20	+	38414363	38441871	30	27508	38414363		NA	NA	TCONS_00027927	NONCODE	-0.00435693
	TC20001283.hg.1	TC20001283.hg.1	chr20	+	49615781	49617367	30	1586	49615781		NA	NA	TCONS_00028217	NONCODE	0.0127162
	TC21000789.hg.1	TC21000789.hg.1	chr21	+	46719823	46720812	30	989	46719823		NA	NA	TCONS_00029061	NONCODE	0.0147454
	TC21000818.hg.1	TC21000818.hg.1	chr21	-	16115527	16116886	30	1359	16116886		NA	NA	TCONS_00029256	NONCODE	0.0141767
	TC20001397.hg.1	TC20001397.hg.1	chr20	-	4409711	4412358	60	2647	4412358		NA	NA	BC039673;TCONS_00027875;TCONS_00027990	NONCODE;NONCODE;NONCODE	-0.0167225
	TC22000630.hg.1	TC22000630.hg.1	chr22	-	29495029	29507671	30	12642	29507671		;		ENST00000456740;OTTHUMT00000320953	ENSEMBL;Havanatranscript	-0.00514126
	TC20001634.hg.1	TC20001634.hg.1	chr20	-	49187512	49194578	30	7066	49194578		NA	NA	AK125862	NONCODE	-0.000325486
	TC21000702.hg.1	TC21000702.hg.1	chr21	+	37952487	37953282	30	795	37952487		NA	NA	TCONS_00029012	NONCODE	0.000426566
	TC22000473.hg.1	TC22000473.hg.1	chr22	-	18062923	18071958	40	9035	18071958		;		ENST00000443935;OTTHUMT00000316225	ENSEMBL;Havanatranscript	0.0112892
	TC22000231.hg.1	TC22000231.hg.1	chr22	+	31850237	31860190	40	9953	31850237		;;;;;		ENST00000439588;ENST00000464523;ENST00000483736;OTTHUMT00000127946;OTTHUMT00000353098;OTTHUMT00000353099	ENSEMBL;ENSEMBL;ENSEMBL;Havanatranscript;Havanatranscript;Havanatranscript	0.00863154
	TC22001169.hg.1	TC22001169.hg.1	chr22	+	48612268	48617438	30	5170	48612268		NA	NA	OTTHUMT00000331464	NONCODE	-0.00296944
	TC22000738.hg.1	TC22000738.hg.1	chr22	-	37756431	37756466	12	35	37756466		DQ572877	DQ572877	DQ572877;DQ572877;uc003arp.2;uc003arp.3	NONCODE;GenBank;NONCODE;UCSCGenes	0.00423096
	TC22000965.hg.1	TC22000965.hg.1	chr22	+	19847802	19854904	19	7102	19847802		NA	NA	TCONS_00029514	NONCODE	-0.000249607
	TC22001412.hg.1	TC22001412.hg.1	chr22	-	50055619	50062451	50	6832	50062451		NA	NA	TCONS_00029736;TCONS_00029931;TCONS_00029932	NONCODE;NONCODE;NONCODE	0.00473106
	TC21001012.hg.1	TC21001012.hg.1	chr21	-	44808523	44809763	27	1240	44809763		NA	NA	TCONS_00029159	NONCODE	-0.00265295
	TC22001007.hg.1	TC22001007.hg.1	chr22	+	22979653	22981151	30	1498	22979653		NA	NA	uc002zwm.2	NONCODE	0.0115621
	TC22001205.hg.1	TC22001205.hg.1	chr22	-	18879968	18882205	30	2237	18882205		NA	NA	TCONS_00029644	NONCODE	0.00579009
	TC21000687.hg.1	TC21000687.hg.1	chr21	+	35430805	35433389	30	2584	35430805				OTTHUMT00000194246	NONCODE	-0.00782746
	TC22001333.hg.1	TC22001333.hg.1	chr22	-	37593262	37595404	30	2142	37595404		NA	NA	linc_luo_1273	NONCODE	-0.0122357
---	TC01001798.hg.1	TC01001798.hg.1	chr1	+	217665317	217667625	30	2308	217665317	RP11-361K17.2	;		OTTHUMT00000092432;ENST00000458184	Havanatranscript;ENSEMBL	-0.00112618
---	TC02002741.hg.1	TC02002741.hg.1	chr2	-	214020530	214032436	30	11906	214032436	AC079610.1			OTTHUMT00000337266;ENST00000426870	Havanatranscript;ENSEMBL	-0.0139977
---	TC02004984.hg.1	TC02004984.hg.1	chr2	+	90192768	90193424	20	656	90192768	IGKV1D-13	IGKV1D-13;IGKV1D-13	IGKV1D-13	ENST00000390275;OTTHUMT00000323146	ENSEMBL;Havanatranscript	-9.87e-06
---	TC04001543.hg.1	TC04001543.hg.1	chr4	-	130781577	130781655	30	78	130781655	RNY5P4	RNY5P4	RNY5P4	ENST00000410929	ENSEMBL	0.0111721
---	TC07001462.hg.1	TC07001462.hg.1	chr7	-	65888515	65888655	30	140	65888655	SKP1P1	SKP1P1	SKP1P1	ENST00000433793	ENSEMBL	0.013473
---	TC08000713.hg.1	TC08000713.hg.1	chr8	+	124056957	124057052	30	95	124056957	RNY4P5	RNY4P5	RNY4P5	ENST00000362808	ENSEMBL	-0.00608856
---	TC11000967.hg.1	TC11000967.hg.1	chr11	+	104123307	104123343	13	36	104123307	RNA5SP348	RNA5SP348	RNA5SP348	ENST00000516442	ENSEMBL	0.00110994
---	TC14000153.hg.1	TC14000153.hg.1	chr14	+	24407940	24409196	30	1256	24407940	DHRS4-AS1			ENST00000354854	ENSEMBL	-8.79e-05
---	TC17000527.hg.1	TC17000527.hg.1	chr17	+	40698771	40699464	30	693	40698771	HSD17B1P1	NA	NA	ENST00000442612	ENSEMBL	0.0139557
---	TC21000012.hg.1	TC21000012.hg.1	chr21	+	10862622	10863067	30	445	10862622	IGHV1OR21-1	IGHV1OR21-1;IGHV1OR21-1;IGHV1OR21-1	IGHV1OR21-1	ENST00000302092;ENST00000559480;OTTHUMT00000157419	ENSEMBL;ENSEMBL;Havanatranscript	-0.0131204
100036565	TC15000098.hg.1	TC15000098.hg.1	chr15	+	25467495	25467575	30	80	25467495	SNORD115-28	SNORD115-28;SNORD115-28;SNORD115-28;SNORD115-28;SNORD115-28;SNORD115-28;SNORD115-28	SNORD115-28	NR_003497;ENST00000363931;NR_003497;uc010ayr.1;uc010ayr.1	RefSeq;ENSEMBL;NONCODE;UCSCGenes;NONCODE	0.00248386
100113378	TC20000561.hg.1	TC20000561.hg.1	chr20	-	2443598	2443693	30	95	2443693	SNORD119	SNORD119;SNORD119;SNORD119;SNORD119;SNORD119	SNORD119	NR_003684;NR_003684;uc010gam.1;uc010gam.1;ENST00000515997	RefSeq;NONCODE;UCSCGenes;NONCODE;ENSEMBL	-0.00614378
100113391	TC14000881.hg.1	TC14000881.hg.1	chr14	-	20794600	20794698	30	98	20794698	SNORD126	SNORD126;SNORD126;SNORD126;SNORD126;SNORD126	SNORD126	NR_003693;NR_003693;uc010ahi.1;uc010ahi.1;ENST00000459475	RefSeq;NONCODE;UCSCGenes;NONCODE;ENSEMBL	0.00757124
100128006	TC17002492.hg.1	TC17002492.hg.1	chr17	-	12663451	12693559	60	30108	12693559	LOC100128006	NA	NA	BX649083	NONCODE	-0.00717275
100128079	TC16001825.hg.1	TC16001825.hg.1	chr16	-	27719346	27730125	30	10779	27730125	LOC100128079	NA	NA	BC031310	NONCODE	0.00986937
100128553;100142659	TC07001980.hg.1	TC07001980.hg.1	chr7	-	143963767	143966392	19	2625	143966392	CTAGE4;CTAGE8	CTAGE8;CTAGE4;CTAGE8	CTAGE8;CTAGE4	NM_198495;ENST00000487179;OTTHUMT00000349996;uc010lpe.3	RefSeq;ENSEMBL;Havanatranscript;UCSCGenes	0.00486627
100129271	TC01001235.hg.1	TC01001235.hg.1	chr1	+	152691082	152692946	26	1864	152691082	C1orf68	C1orf68;C1orf68;C1orf68	C1orf68	NM_001024679;ENST00000368775;OTTHUMT00000034521;uc010pdu.2;ENST00000362017	RefSeq;ENSEMBL;Havanatranscript;UCSCGenes;ENSEMBL	0.0181315
100129316	TC09001321.hg.1	TC09001321.hg.1	chr9	-	93825576	93837414	40	11838	93837414	LOC100129316	LOC100129316	LOC100129316	NR_033912;uc004ard.1	RefSeq;UCSCGenes	-0.000284396
100129354	TC03000264.hg.1	TC03000264.hg.1	chr3	+	47053032	47054957	40	1925	47053032	NRADDP	NRADDP;NRADDP;NRADDP	NRADDP	NR_024046;NR_024046;uc011bas.1	RefSeq;NONCODE;UCSCGenes	0.0032547
100129354	TC03002323.hg.1	TC03002323.hg.1	chr3	+	47053032	47054957	40	1925	47053032	NRADDP	NRADDP	NRADDP	NR_024046	NONCODE	0.00390778
100131138	TC12000862.hg.1	TC12000862.hg.1	chr12	+	111374389	111396012	60	21623	111374389	LINC01405	;;;;;;LOC100131138;;	LOC100131138	NR_036513;ENST00000331096;ENST00000547607;ENST00000548368;ENST00000553177;ENST00000547607;ENST00000548368;ENST00000553177;uc001trz.3	RefSeq;ENSEMBL;ENSEMBL;ENSEMBL;ENSEMBL;NONCODE;NONCODE;NONCODE;UCSCGenes	-0.000953089
100131138	TC12002568.hg.1	TC12002568.hg.1	chr12	+	111374389	111396124	120	21735	111374389	LINC01405	;;		ENST00000547607;ENST00000548368;ENST00000553177;linc_luo_322;TCONS_00020160;TCONS_00020561;TCONS_00021212;TCONS_00021213	NONCODE;NONCODE;NONCODE;NONCODE;NONCODE;NONCODE;NONCODE;NONCODE	-0.00360036
100131801	TC19000131.hg.1	TC19000131.hg.1	chr19	+	7694671	7696510	40	1839	7694671	PET100	PET100;PET100;PET100;PET100	PET100	NM_001171155;NR_033242;ENST00000456958;NR_033242;uc010dvi.2;uc021unv.1	RefSeq;RefSeq;ENSEMBL;NONCODE;UCSCGenes;UCSCGenes	-0.00203125
100132272	TC19000594.hg.1	TC19000594.hg.1	chr19	+	42746927	42749125	30	2198	42746927	LOC100132272			ENST00000378108	ENSEMBL	0.00707433
100134015	TC20000034.hg.1	TC20000034.hg.1	chr20	+	3087557	3131513	80	43956	3087557	UBOX5-AS1	UBOX5-AS1;UBOX5-AS1;UBOX5-AS1;UBOX5-AS1;UBOX5-AS1	UBOX5-AS1	NR_038395;ENST00000446537;uc002whv.1;OTTHUMT00000077704;OTTHUMT00000077705	RefSeq;ENSEMBL;UCSCGenes;Havanatranscript;Havanatranscript	-0.00333562
100134015	TC20001066.hg.1	TC20001066.hg.1	chr20	+	3087557	3131513	80	43956	3087557	UBOX5-AS1	UBOX5-AS1	UBOX5-AS1	AK097516;ENST00000454019	NONCODE;NONCODE	-0.000261378
100169751	TC01003920.hg.1	TC01003920.hg.1	chr1	-	228746015	228746133	30	118	228746133	RNA5S1	RNA5S1	RNA5S1	ENST00000362482	ENSEMBL	-0.00557898
100169753	TC01003921.hg.1	TC01003921.hg.1	chr1	-	228748256	228748374	30	118	228748374	RNA5S2	RNA5S2	RNA5S2	ENST00000364718	ENSEMBL	-0.0059876
100169754	TC01003922.hg.1	TC01003922.hg.1	chr1	-	228750497	228750615	30	118	228750615	RNA5S3	RNA5S3	RNA5S3	ENST00000362467	ENSEMBL	-0.00630124
100169755	TC01003923.hg.1	TC01003923.hg.1	chr1	-	228752738	228752856	30	118	228752856	RNA5S4	RNA5S4	RNA5S4	ENST00000363511	ENSEMBL	-0.00644927
100169756	TC01003924.hg.1	TC01003924.hg.1	chr1	-	228754979	228755097	30	118	228755097	RNA5S5	RNA5S5	RNA5S5	ENST00000362526	ENSEMBL	-0.00645888
100169757	TC01003925.hg.1	TC01003925.hg.1	chr1	-	228757194	228757312	30	118	228757312	RNA5S6	RNA5S6	RNA5S6	ENST00000363754	ENSEMBL	-0.0063905
100169758	TC01003926.hg.1	TC01003926.hg.1	chr1	-	228759414	228759532	30	118	228759532	RNA5S7	RNA5S7	RNA5S7	ENST00000365651	ENSEMBL	-0.00629458
100169759	TC01003927.hg.1	TC01003927.hg.1	chr1	-	228761656	228761774	30	118	228761774	RNA5S8	RNA5S8	RNA5S8	ENST00000363473	ENSEMBL	-0.0062009
100169761	TC01003929.hg.1	TC01003929.hg.1	chr1	-	228766137	228766255	30	118	228766255	RNA5S10	RNA5S10	RNA5S10	ENST00000363040	ENSEMBL	-0.00612289
100169762	TC01003930.hg.1	TC01003930.hg.1	chr1	-	228768378	228768496	30	118	228768496	RNA5S11	RNA5S11	RNA5S11	ENST00000362464	ENSEMBL	-0.00606474
100169763	TC01003931.hg.1	TC01003931.hg.1	chr1	-	228770618	228770736	30	118	228770736	RNA5S12	RNA5S12	RNA5S12	ENST00000362400	ENSEMBL	-0.00602616
100169764	TC01003932.hg.1	TC01003932.hg.1	chr1	-	228772843	228772961	30	118	228772961	RNA5S13	RNA5S13	RNA5S13	ENST00000365656	ENSEMBL	-0.00600466
100169765	TC01003933.hg.1	TC01003933.hg.1	chr1	-	228775084	228775202	30	118	228775202	RNA5S14	RNA5S14	RNA5S14	ENST00000364485	ENSEMBL	-0.00599637
100169766	TC01003934.hg.1	TC01003934.hg.1	chr1	-	228777315	228777433	30	118	228777433	RNA5S15	RNA5S15	RNA5S15	ENST00000365055	ENSEMBL	-0.00599671
100169767	TC01003935.hg.1	TC01003935.hg.1	chr1	-	228779556	228779674	30	118	228779674	RNA5S16	RNA5S16	RNA5S16	ENST00000365387	ENSEMBL	-0.00600112
100169768	TC01003936.hg.1	TC01003936.hg.1	chr1	-	228781787	228781905	30	118	228781905	RNA5S17	RNA5S17	RNA5S17	ENST00000363500	ENSEMBL	-0.00600565
100192420	TC22000027.hg.1	TC22000027.hg.1	chr22	+	18512151	18520734	30	8583	18512151	FLJ41941	;;FLJ41941;	FLJ41941	NR_024417;ENST00000443243;uc002zno.1;OTTHUMT00000331424	RefSeq;ENSEMBL;UCSCGenes;NONCODE	-0.00720409
100270746	TC06001383.hg.1	TC06001383.hg.1	chr6	-	26987145	26988085	30	940	26988085	LOC100270746	LOC100270746	LOC100270746	NR_026776;uc011dks.2;uc011dks.1	RefSeq;UCSCGenes;NONCODE	0.00340466
100287592	TC05001336.hg.1	TC05001336.hg.1	chr5	-	50265051	50266021	67	970	50266021	LOC100287592	;		ENST00000506534;ENST00000513880;OTTHUMT00000368779	ENSEMBL;ENSEMBL;Havanatranscript	-0.0193436
100287632	TC06003018.hg.1	TC06003018.hg.1	chr6	+	119078681	119104583	30	25902	119078681	LOC100287632			NR_037662;TCONS_l2_00025229-XLOC_l2_012701	NONCODE;BroadTUCP	0.00725581
100287632	TC06000936.hg.1	TC06000936.hg.1	chr6	+	119078681	119104583	30	25902	119078681	LOC100287632	LOC100287632;;;	LOC100287632	NR_037662;NR_037662;uc021zeg.1;ENST00000429807	RefSeq;NONCODE;UCSCGenes;ENSEMBL	0.00138932
100287898	TC01002124.hg.1	TC01002124.hg.1	chr1	-	2567415	2706280	110	138865	2706280	TTC34	TTC34;TTC34;TTC34;TTC34;TTC34	TTC34	NM_001242672;ENST00000401094;ENST00000401095;OTTHUMT00000001290;uc021oey.1	RefSeq;ENSEMBL;ENSEMBL;Havanatranscript;UCSCGenes	0.00506028
100288181	TC08002558.hg.1	TC08002558.hg.1	chr8	-	143783670	143808391	40	24721	143808391	LOC100288181	NA	NA	CR627188	NONCODE	0.00720938
100302739	TC20000055.hg.1	TC20000055.hg.1	chr20	+	5100232	5100615	30	383	5100232	PCNA-AS1	PCNA-AS1	PCNA-AS1	NR_028370;NR_028370;uc021wai.1	RefSeq;NONCODE;UCSCGenes	0.000677267
100379345	TC09002250.hg.1	TC09002250.hg.1	chr9	+	127420691	127460907	40	40216	127420691	MIR181A2HG	NA	NA	BC030772;NR_038975;uc004bos.2	NONCODE;NONCODE;NONCODE	0.00971507
10039	TC03000326.hg.1	TC03000326.hg.1	chr3	+	51976361	51982883	210	6522	51976361	PARP3	PARP3;PARP3;PARP3;PARP3;PARP3;PARP3;PARP3;PARP3;PARP3;PARP3;PARP3;PARP3;PARP3;PARP3;PARP3;PARP3	PARP3	NM_001003931;NM_005485;ENST00000398755;ENST00000417220;ENST00000431474;ENST00000486510;BC014260;OTTHUMT00000346638;OTTHUMT00000348612;OTTHUMT00000348613;OTTHUMT00000348614;OTTHUMT00000348615;OTTHUMT00000348616;OTTHUMT00000348617;OTTHUMT00000348618;uc003dby.3;uc003dbz.3	RefSeq;RefSeq;ENSEMBL;ENSEMBL;ENSEMBL;ENSEMBL;GenBank;Havanatranscript;Havanatranscript;Havanatranscript;Havanatranscript;Havanatranscript;Havanatranscript;Havanatranscript;Havanatranscript;UCSCGenes;UCSCGenes	0.00136305
10040	TC17000691.hg.1	TC17000691.hg.1	chr17	+	52978052	53039328	226	61276	52978052	TOM1L1	TOM1L1;TOM1L1;TOM1L1;TOM1L1;TOM1L1;TOM1L1;TOM1L1;TOM1L1;TOM1L1;TOM1L1;TOM1L1;TOM1L1;TOM1L1;TOM1L1	TOM1L1	NM_005486;ENST00000348161;ENST00000445275;ENST00000536554;AK001893;AK225351;AK300823;AK303912;AK303913;AK309164;AK315907;BC029396;uc002iub.3;uc002iuc.3;uc002iud.2;uc010dbz.2;uc010dca.1;uc010dcb.1;uc010wnb.1;uc010wnc.1;uc010wnd.1;ENST00000540336	RefSeq;ENSEMBL;ENSEMBL;ENSEMBL;GenBank;GenBank;GenBank;GenBank;GenBank;GenBankHTC;GenBank;GenBank;UCSCGenes;UCSCGenes;UCSCGenes;UCSCGenes;UCSCGenes;UCSCGenes;UCSCGenes;UCSCGenes;UCSCGenes;ENSEMBL	-0.00212474
100505687	TC03000979.hg.1	TC03000979.hg.1	chr3	+	183165396	183173801	60	8405	183165396	LINC00888	LINC00888;LINC00888;LINC00888;LINC00888;LINC00888	LINC00888	NR_038301;NR_038302;ENST00000471496;NR_038302;uc003flq.2;uc021xid.1	RefSeq;RefSeq;ENSEMBL;NONCODE;UCSCGenes;UCSCGenes	-0.00781279
100505795	TC01003459.hg.1	TC01003459.hg.1	chr1	-	164738353	164743878	40	5525	164743878	LOC100505795	;;;LOC100505795	LOC100505795	NR_038072;ENST00000421530;uc021pdx.1;OTTHUMT00000083368	RefSeq;ENSEMBL;UCSCGenes;Havanatranscript	-0.00482608
100505853	TC18000580.hg.1	TC18000580.hg.1	chr18	-	73408034	73424340	30	16306	73424340	LOC100505853	BC037384	BC037384	BC037384;BC037384;uc002lmc.3	NONCODE;GenBank;UCSCGenes	0.0197861
100506392	TC01004636.hg.1	TC01004636.hg.1	chr1	+	113499037	113550270	244	51233	113499037	SLC16A1-AS1	BC047723;SLC16A1-AS1;SLC16A1-AS1;SLC16A1-AS1	BC047723;SLC16A1-AS1	BC047723;ENST00000416193;ENST00000420168;ENST00000428411;linc_luo_1004;linc_luo_1005;uc001edc.1	NONCODE;NONCODE;NONCODE;NONCODE;NONCODE;NONCODE;NONCODE	-0.00125928
100506835	TC10000283.hg.1	TC10000283.hg.1	chr10	+	44354859	44390881	50	36022	44354859	LINC00840	LINC00840;LINC00840;LINC00840;LINC00840	LINC00840	NR_038268;ENST00000431737;uc021ppj.1;OTTHUMT00000047732	RefSeq;ENSEMBL;UCSCGenes;NONCODE	-0.000958393
100507240	TC13000149.hg.1	TC13000149.hg.1	chr13	+	42535305	42555701	40	20396	42535305	VWA8-AS1	VWA8-AS1	VWA8-AS1	NR_039974;uc021rix.1;ENST00000501265	RefSeq;UCSCGenes;ENSEMBL	0.00840146
100507564	TC01000652.hg.1	TC01000652.hg.1	chr1	+	53704282	53708455	30	4173	53704282	LOC100507564	LOC100507564;;;	LOC100507564	NR_038953;ENST00000458151;uc001cvg.3;OTTHUMT00000024756	RefSeq;ENSEMBL;UCSCGenes;Havanatranscript	0.00287407
100507564	TC01004386.hg.1	TC01004386.hg.1	chr1	+	53704282	53708455	30	4173	53704282	LOC100507564	NA	NA	BC033363	NONCODE	0.00951689
100507600	TC02000884.hg.1	TC02000884.hg.1	chr2	+	136577761	136580657	30	2896	136577761	LOC100507600	;;LOC100507600;	LOC100507600	NR_045486;ENST00000437007;uc002tuv.1;OTTHUMT00000331711	RefSeq;ENSEMBL;UCSCGenes;Havanatranscript	-0.0283174
100508120	TC06000016.hg.1	TC06000016.hg.1	chr6	+	2391780	2484263	70	92483	2391780	GMDS-AS1	LOC100508120;AK091028;GMDS-AS1	LOC100508120;AK091028;GMDS-AS1	AJ420566;AJ420566;AK091028;CR933638;ENST00000505870;uc003mtu.1;uc003mtv.3;uc021yko.1	NONCODE;GenBank;GenBank;GenBankHTC;ENSEMBL;UCSCGenes;UCSCGenes;UCSCGenes	0.0161652
100652730	TC20001343.hg.1	TC20001343.hg.1	chr20	+	61404869	61407369	60	2500	61404869	LINC00659	NA	NA	BC141903;AX747649	NONCODE;NONCODE	-0.00594619
100652856	TC13000911.hg.1	TC13000911.hg.1	chr13	+	19479579	19500896	66	21317	19479579	LINC00408	NA	NA	BC035261;TCONS_00021478-XLOC_010286;TCONS_00021523;TCONS_00021705;TCONS_00022134	NONCODE;RinnlincRNA;NONCODE;NONCODE;NONCODE	0.00123149
100861510	TC21000520.hg.1	TC21000520.hg.1	chr21	-	45870869	45875167	40	4298	45875167	LRRC3-AS1	LRRC3-AS1;LRRC3-AS1	LRRC3-AS1	ENST00000426578;OTTHUMT00000098090	ENSEMBL;Havanatranscript	-0.0124763
100873777	TC18000441.hg.1	TC18000441.hg.1	chr18	-	29249252	29249341	30	89	29249341	RNU6-76P	RNU6-1002P	RNU6-1002P	ENST00000516570	ENSEMBL	0.00736208
100874058	TC17002497.hg.1	TC17002497.hg.1	chr17	-	13620676	13636592	30	15916	13636592	COX10-AS1	COX10-AS1	COX10-AS1	OTTHUMT00000129955	NONCODE	-0.0103448
100874059	TC13000095.hg.1	TC13000095.hg.1	chr13	+	30446750	30462542	30	15792	30446750	LINC00297	NA	NA	ENST00000453470;OTTHUMT00000303976	ENSEMBL;NONCODE	-0.00755958
100874074	TC13000208.hg.1	TC13000208.hg.1	chr13	+	51381991	51424041	70	42050	51381991	DLEU7-AS1	DLEU7-AS1;DLEU7-AS1;DLEU7-AS1	DLEU7-AS1	ENST00000413510;BC035769;uc001vey.3;OTTHUMT00000045004;uc001vey.2	ENSEMBL;GenBankHTC;UCSCGenes;Havanatranscript;NONCODE	0.0043531
100874083	TC03001931.hg.1	TC03001931.hg.1	chr3	-	155933349	155945672	40	12323	155945672	KCNAB1-AS2	KCNAB1-AS2;KCNAB1-AS2	KCNAB1-AS2	ENST00000473876;OTTHUMT00000351257	ENSEMBL;Havanatranscript	0.00329527
100874203	TC13000874.hg.1	TC13000874.hg.1	chr13	-	111154922	111160526	30	5604	111160526	COL4A2-AS1	COL4A2-AS1;COL4A2-AS1	COL4A2-AS1	ENST00000417970;OTTHUMT00000312863	ENSEMBL;Havanatranscript	-0.000929097
100996425	TC16001295.hg.1	TC16001295.hg.1	chr16	-	80862640	80926493	30	63853	80926493	PRCAT47	AK093002	AK093002	AK093002;uc002fft.1	GenBank;UCSCGenes	0.00716604
100996694	TC04000618.hg.1	TC04000618.hg.1	chr4	+	120860695	120885376	30	24681	120860695	LOC100996694	;		ENST00000505122;OTTHUMT00000364578	ENSEMBL;Havanatranscript	0.00786312
10157	TC07001811.hg.1	TC07001811.hg.1	chr7	-	121713598	121784344	352	70746	121784344	AASS	AASS;AASS;AASS;AASS;AASS;AASS;AASS;AASS;AASS;AASS;AASS;AASS;AASS;AASS;AASS;AASS	AASS	NM_005763;ENST00000393376;ENST00000417368;ENST00000473553;AJ007714;AK294326;BC144246;BC144247;OTTHUMT00000347298;OTTHUMT00000347299;OTTHUMT00000347300;OTTHUMT00000347301;OTTHUMT00000347302;OTTHUMT00000347303;OTTHUMT00000347304;uc003vka.3;uc003vkb.3;uc011knu.2;uc011knv.2;uc011knw.2	RefSeq;ENSEMBL;ENSEMBL;ENSEMBL;GenBank;GenBank;GenBankHTC;GenBank;Havanatranscript;Havanatranscript;Havanatranscript;Havanatranscript;Havanatranscript;Havanatranscript;Havanatranscript;UCSCGenes;UCSCGenes;UCSCGenes;UCSCGenes;UCSCGenes	0.0709449
101926911	TC15000876.hg.1	TC15000876.hg.1	chr15	+	91565849	91579841	110	13992	91565849	LOC101926911	AK055351;;;;;	AK055351	ENST00000417221;ENST00000501381;ENST00000556904;ENST00000557804;AK055351;ENST00000501381;uc002bqr.2	ENSEMBL;ENSEMBL;ENSEMBL;ENSEMBL;GenBank;NONCODE;UCSCGenes	-0.013519
101926960	TC05001309.hg.1	TC05001309.hg.1	chr5	-	42155935	42175356	40	19421	42175356	LOC101926960	AK000840	AK000840	AK000840;uc003jms.1	GenBank;UCSCGenes	-0.0155625
101927121	TC13001163.hg.1	TC13001163.hg.1	chr13	+	74862164	74982939	30	120775	74862164	LOC101927121	NA	NA	AK095282	NONCODE	-0.00454216
101927195	TC13000305.hg.1	TC13000305.hg.1	chr13	+	80446721	80492171	70	45450	80446721	LINC00382	LINC00382;LINC00382;BC036310	LINC00382;BC036310	BC036310;BC036310;ENST00000427918;OTTHUMT00000045385;uc001vlh.3	NONCODE;GenBank;ENSEMBL;NONCODE;UCSCGenes	-0.0111942
101927482	TC02001140.hg.1	TC02001140.hg.1	chr2	+	197124748	197128928	60	4180	197124748	LOC101927482	;;BC062769;	BC062769	ENST00000433933;BC062769;OTTHUMT00000335312;OTTHUMT00000335313;uc002utn.1	ENSEMBL;GenBank;Havanatranscript;Havanatranscript;UCSCGenes	-0.0093761
101927490	TC04002749.hg.1	TC04002749.hg.1	chr4	-	140539290	140544386	30	5096	140544386	LOC101927490	NA	NA	BC043588;TCONS_00007858	NONCODE;NONCODE	0.00797221
101927502	TC09000362.hg.1	TC09000362.hg.1	chr9	+	84304628	84391815	52	87187	84304628	LOC101927502	;;;BC036431	BC036431	ENST00000437181;BC036431;BC036431;OTTHUMT00000052807;OTTHUMT00000052808;uc004amd.3	ENSEMBL;NONCODE;GenBank;Havanatranscript;Havanatranscript;UCSCGenes	0.0161312
101927752	TC08000887.hg.1	TC08000887.hg.1	chr8	-	1710156	1712668	60	2512	1712668	LOC101927752	;;;;;		ENST00000517959;ENST00000518481;ENST00000518822;OTTHUMT00000374586;OTTHUMT00000374587;OTTHUMT00000374588	ENSEMBL;ENSEMBL;ENSEMBL;Havanatranscript;Havanatranscript;Havanatranscript	0.0110649
101927813	TC05003334.hg.1	TC05003334.hg.1	chr5	-	162909610	162921064	40	11454	162921064	HMMR-AS1	NA	NA	BC035392	NONCODE	-0.0156484
101927849	TC04000739.hg.1	TC04000739.hg.1	chr4	+	150075447	150199275	130	123828	150075447	LOC101927849	;		ENST00000503100;OTTHUMT00000364765	ENSEMBL;Havanatranscript	0.00673536
101927990	TC06000953.hg.1	TC06000953.hg.1	chr6	+	123760749	123792901	46	32152	123760749	HRAT13	;AL832096;;;;;	AL832096	AL832096;ENST00000418467;ENST00000427828;ENST00000434768;OTTHUMT00000042047;OTTHUMT00000042048;OTTHUMT00000042049;uc003pzm.1	NONCODE;ENSEMBL;ENSEMBL;ENSEMBL;Havanatranscript;Havanatranscript;Havanatranscript;UCSCGenes	-0.0101444
101927990	TC06003031.hg.1	TC06003031.hg.1	chr6	+	123760749	123792901	30	32152	123760749	HRAT13	NA	NA	AL832096	NONCODE	-0.00937601
101928211	TC07001827.hg.1	TC07001827.hg.1	chr7	-	123977434	123992154	48	14720	123992154	LOC101928211	;;BC031318	BC031318	BC031318;BC031318;ENST00000470677;OTTHUMT00000348432;uc003vlh.1	NONCODE;GenBank;ENSEMBL;Havanatranscript;UCSCGenes	-0.0187734
101928551	TC04002335.hg.1	TC04002335.hg.1	chr4	+	175750819	175802532	105	51713	175750819	LOC101928551	NA	NA	BC034301;TCONS_00007413;TCONS_00007414-XLOC_003789;TCONS_00008339;TCONS_00008340	NONCODE;NONCODE;RinnlincRNA;NONCODE;NONCODE	0.00458653
101928661	TC06002198.hg.1	TC06002198.hg.1	chr6	-	146917094	146920067	30	2973	146920067	LOC101928661	;		ENST00000419168;OTTHUMT00000042580	ENSEMBL;Havanatranscript	-0.00782944
101928781	TC10000375.hg.1	TC10000375.hg.1	chr10	+	63212397	63253189	60	40792	63212397	TMEM26-AS1	BC041470;;	BC041470	BC041470;BC041470;ENST00000389640;OTTHUMT00000048227;uc001jlr.3	NONCODE;GenBank;ENSEMBL;Havanatranscript;UCSCGenes	0.00290782
101928781	TC10002091.hg.1	TC10002091.hg.1	chr10	+	63212397	63255993	95	43596	63212397	TMEM26-AS1	NA	NA	BC041470;TCONS_00018214;TCONS_00018215;TCONS_00018740	NONCODE;NONCODE;NONCODE;NONCODE	0.00237294
101929159	TC03000372.hg.1	TC03000372.hg.1	chr3	+	57678932	57682323	30	3391	57678932	LOC101929159	;		ENST00000465933;OTTHUMT00000351592	ENSEMBL;Havanatranscript	-0.00106747
101929181	TC01000143.hg.1	TC01000143.hg.1	chr1	+	11669588	11673412	30	3824	11669588	LOC101929181	;		ENST00000453135;OTTHUMT00000005777	ENSEMBL;NONCODE	-0.00263978
101929268	TC08001907.hg.1	TC08001907.hg.1	chr8	+	49464127	49611069	53	146942	49464127	LOC101929268	NA	NA	AK092055;TCONS_00014693	NONCODE;NONCODE	-0.00241858
101929328	TC10000491.hg.1	TC10000491.hg.1	chr10	+	78647802	78663848	30	16046	78647802	KCNMA1-AS1	;;BC030624	BC030624	ENST00000429850;BC030624;BC030624;OTTHUMT00000048850;uc001jxp.3	ENSEMBL;NONCODE;GenBank;Havanatranscript;UCSCGenes	-0.00122308
101929374	TC22000132.hg.1	TC22000132.hg.1	chr22	+	23775751	23777258	40	1507	23775751	LOC101929374	;;;		ENST00000428415;ENST00000449711;OTTHUMT00000319542;OTTHUMT00000319543	ENSEMBL;ENSEMBL;NONCODE;NONCODE	-0.00439957
101929550	TC08002284.hg.1	TC08002284.hg.1	chr8	-	35529681	35567838	50	38157	35567838	LOC101929550	NA	NA	AL137475	NONCODE	-0.0107294
101929567	TC02001552.hg.1	TC02001552.hg.1	chr2	-	8699963	8723922	80	23959	8723922	LOC101929567	;;;		ENST00000436187;ENST00000454224;OTTHUMT00000323302;OTTHUMT00000323326	ENSEMBL;ENSEMBL;NONCODE;NONCODE	0.00719164
101929694	TC03001652.hg.1	TC03001652.hg.1	chr3	-	112455294	112468166	50	12872	112468166	LOC101929694	;		ENST00000481624;OTTHUMT00000354575	ENSEMBL;Havanatranscript	-0.00905599
101929717	TC03001659.hg.1	TC03001659.hg.1	chr3	-	112861197	112886666	40	25469	112886666	LOC101929717	;		ENST00000490139;OTTHUMT00000354629	ENSEMBL;Havanatranscript	-0.00764982
101929741	TC04002687.hg.1	TC04002687.hg.1	chr4	-	119584229	119605621	110	21392	119605621	LOC101929741	NA	NA	BC035733;TCONS_00008555;TCONS_00008556	NONCODE;NONCODE;NONCODE	0.000897298
101929745	TC05000173.hg.1	TC05000173.hg.1	chr5	+	38148582	38153817	30	5235	38148582	LOC101929745	;		ENST00000508853;OTTHUMT00000367357	ENSEMBL;Havanatranscript	0.000252728
101929988	TC15001187.hg.1	TC15001187.hg.1	chr15	-	34147101	34149010	30	1909	34149010	LOC101929988			ENST00000560404	ENSEMBL	0.00867565
10206;283518	TC13000202.hg.1	TC13000202.hg.1	chr13	+	50570024	50595058	197	25034	50570024	TRIM13;KCNRG	TRIM13;TRIM13;KCNRG;TRIM13;TRIM13;TRIM13;TRIM13;TRIM13;TRIM13;TRIM13;TRIM13;TRIM13;TRIM13;KCNRG;TRIM13;KCNRG;KCNRG;TRIM13;KCNRG;TRIM13;TRIM13;TRIM13;TRIM13;TRIM13;KCNRG;TRIM13;KCNRG;TRIM13;KCNRG;TRIM13;TRIM13	TRIM13;KCNRG	NM_001007278;NM_005798;NM_052811;NM_173605;NM_199464;NM_213590;ENST00000312942;ENST00000356017;ENST00000360473;ENST00000378182;ENST00000420995;ENST00000457662;ENST00000478111;BC003579;BC020887;BC032343;BC063407;OTTHUMT00000044949;OTTHUMT00000044950;OTTHUMT00000044951;OTTHUMT00000044952;OTTHUMT00000276307;OTTHUMT00000276308;OTTHUMT00000276309;OTTHUMT00000276310;OTTHUMT00000354875;OTTHUMT0000035487…	RefSeq;RefSeq;RefSeq;RefSeq;RefSeq;RefSeq;ENSEMBL;ENSEMBL;ENSEMBL;ENSEMBL;ENSEMBL;ENSEMBL;ENSEMBL;GenBank;GenBank;GenBank;GenBank;Havanatranscript;Havanatranscript;Havanatranscript;Havanatranscript;Havanatranscript;Havanatranscript;Havanatranscript;Havanatranscript;Havanatranscript;Havanatranscript;UCSCGenes;UCSCGenes;UCSCGenes;UCSCGenes;UCSCGenes;UCSCGenes;ENSEMBL;UCSCGenes	-0.00254628
10233;283345	TC12000097.hg.1	TC12000097.hg.1	chr12	+	6982553	7023407	336	40854	6982553	LRRC23;RPL13P5	LRRC23;LRRC23;LRRC23;LRRC23;LRRC23;LRRC23;RPL13P5;LRRC23;LRRC23;LRRC23;LRRC23;LRRC23;LRRC23;LRRC23;LRRC23;LRRC23;LRRC23;LRRC23;LRRC23;LRRC23;LRRC23;LRRC23;LRRC23;RPL13P5;LRRC23;LRRC23;LRRC23;RRPL13L;LRRC23;LRRC23;LRRC23;LRRC23;LRRC23	LRRC23;RPL13P5;RRPL13L	NM_001135217;NM_006992;NM_201650;NR_002803;ENST00000007969;ENST00000323702;ENST00000429740;ENST00000433346;ENST00000436789;ENST00000443597;ENST00000449039;AY834277;BC011980;BC014450;BC029858;OTTHUMT00000345214;OTTHUMT00000345215;OTTHUMT00000345216;OTTHUMT00000345217;OTTHUMT00000345218;OTTHUMT00000345219;OTTHUMT00000345220;OTTHUMT00000345221;OTTHUMT00000345222;OTTHUMT00000345223;OTTHUMT00000345224…	RefSeq;RefSeq;RefSeq;RefSeq;ENSEMBL;ENSEMBL;ENSEMBL;ENSEMBL;ENSEMBL;ENSEMBL;ENSEMBL;GenBank;GenBankHTC;GenBankHTC;GenBank;Havanatranscript;Havanatranscript;Havanatranscript;Havanatranscript;Havanatranscript;Havanatranscript;Havanatranscript;Havanatranscript;Havanatranscript;Havanatranscript;Havanatranscript;Havanatranscript;Havanatranscript;Havanatranscript;NONCODE;GenBank;UCSCGenes;UCSCGenes;UCS…	0.00777768
10239	TC15002782.hg.1	TC15002782.hg.1	chr15	-	90373831	90437617	199	63786	90437617	AP3S2	AP3S2;AP3S2;AP3S2;AP3S2;AP3S2;AP3S2;AP3S2;AP3S2;AP3S2;AP3S2	AP3S2	NM_005829;NR_023361;NR_037582;ENST00000336418;ENST00000558011;ENST00000560184;ENST00000560771;ENST00000560940;BC002785;BC010020;NR_023361;OTTHUMT00000313422;uc002boq.4;uc002bor.4;uc010bns.3	RefSeq;RefSeq;RefSeq;ENSEMBL;ENSEMBL;ENSEMBL;ENSEMBL;ENSEMBL;GenBank;GenBank;NONCODE;Havanatranscript;UCSCGenes;UCSCGenes;UCSCGenes	0.0155957
1024	TC13000068.hg.1	TC13000068.hg.1	chr13	+	26828276	26979375	220	151099	26828276	CDK8	CDK8;CDK8;CDK8;CDK8;CDK8;CDK8;CDK8;CDK8;CDK8;CDK8;CDK8;CDK8	CDK8	NM_001260;ENST00000381527;ENST00000480323;ENST00000536792;AY702976;BC069634;BC104492;BC105950;BC107601;OTTHUMT00000044250;OTTHUMT00000044251;OTTHUMT00000044252;OTTHUMT00000044253;OTTHUMT00000044254;uc001uqr.1;uc001uqs.1;uc001uqt.1	RefSeq;ENSEMBL;ENSEMBL;ENSEMBL;GenBank;GenBank;GenBank;GenBank;GenBank;Havanatranscript;Havanatranscript;Havanatranscript;Havanatranscript;Havanatranscript;UCSCGenes;UCSCGenes;UCSCGenes	-0.00012385
102467074	TC05000028.hg.1	TC05000028.hg.1	chr5	+	3178209	3181346	30	3137	3178209	LINC01377	;		ENST00000505396;OTTHUMT00000365505	ENSEMBL;Havanatranscript	-0.00358502
102724058;101929680	TC02000990.hg.1	TC02000990.hg.1	chr2	+	166938041	167158297	120	220256	166938041	LOC102724058;LOC101929680	;;BC051759	BC051759	ENST00000447809;BC051759;OTTHUMT00000333641;uc002udp.3	ENSEMBL;GenBank;Havanatranscript;UCSCGenes	-0.016614
102724392	TC05001461.hg.1	TC05001461.hg.1	chr5	-	70647682	70742169	50	94487	70742169	LOC102724392	AK123868;;AK310013;;;AK310013;	AK123868;AK310013	ENST00000502659;AK123868;AK310013;ENST00000502659;OTTHUMT00000374679;OTTHUMT00000374680;uc003kbl.1;uc010iyu.1;uc010iyu.1	ENSEMBL;GenBank;GenBankHTC;NONCODE;Havanatranscript;Havanatranscript;UCSCGenes;UCSCGenes;NONCODE	-0.0160519
102724555	TC07001822.hg.1	TC07001822.hg.1	chr7	-	123224913	123265011	140	40098	123265011	LOC102724555	;;;;;;;;;		ENST00000418409;ENST00000422401;ENST00000429396;ENST00000440504;ENST00000451016;OTTHUMT00000347500;OTTHUMT00000347501;OTTHUMT00000347502;OTTHUMT00000347503;OTTHUMT00000347504	ENSEMBL;ENSEMBL;ENSEMBL;ENSEMBL;ENSEMBL;Havanatranscript;Havanatranscript;Havanatranscript;Havanatranscript;Havanatranscript	-0.00366371
102724776	TC04000783.hg.1	TC04000783.hg.1	chr4	+	156226164	156267711	40	41547	156226164	LOC102724776	;;;		ENST00000508191;ENST00000512269;OTTHUMT00000365130;OTTHUMT00000365131	ENSEMBL;ENSEMBL;Havanatranscript;Havanatranscript	0.00618515
102724917	TC14000186.hg.1	TC14000186.hg.1	chr14	+	29299450	29437606	140	138156	29299450	LOC102724917	;;;;;;;;;;;		ENST00000548087;ENST00000548775;ENST00000550122;ENST00000550827;ENST00000550990;ENST00000551588;ENST00000548087;ENST00000548775;ENST00000550122;ENST00000550827;ENST00000550990;ENST00000551588	ENSEMBL;ENSEMBL;ENSEMBL;ENSEMBL;ENSEMBL;ENSEMBL;NONCODE;NONCODE;NONCODE;NONCODE;NONCODE;NONCODE	-0.00845265
10301	TC13001087.hg.1	TC13001087.hg.1	chr13	+	50656334	51205735	372	549401	50656334	DLEU1	DLEU1;DLEU1;BCMS;DLEU1;DLEU1;DLEU1;BCMS;BCMS;BCMS;DLEU1;DLEU1;DLEU1;BCMS;DLEU1	DLEU1;BCMS	AJ412044;AJ412053;AJ412063;uc001vee.1;uc001vef.1;uc001veg.1;uc001vei.1;uc010adl.1;uc010adm.1;uc010adn.1;uc010ado.1;uc010adp.1;linc_luo_1968;linc_luo_357;TCONS_00021486-XLOC_010390;TCONS_00021487;TCONS_00021488;TCONS_00021489;TCONS_00021490;TCONS_00021491;TCONS_00021492;TCONS_00021791;uc001vec.2;uc001ved.2;uc001vek.1;uc001vel.1;uc001vem.1;uc001ven.1;uc001veo.1;uc001vep.1;uc010tgn.1	NONCODE;NONCODE;NONCODE;NONCODE;NONCODE;NONCODE;NONCODE;NONCODE;NONCODE;NONCODE;NONCODE;NONCODE;NONCODE;NONCODE;RinnlincRNA;NONCODE;NONCODE;NONCODE;NONCODE;NONCODE;NONCODE;NONCODE;NONCODE;NONCODE;NONCODE;NONCODE;NONCODE;NONCODE;NONCODE;NONCODE;NONCODE	0.0161657
103344930	TC03003110.hg.1	TC03003110.hg.1	chr3	-	138654031	138662862	70	8831	138662862	LINC01391	;		AK128202;ENST00000477059;ENST00000483650	NONCODE;NONCODE;NONCODE	-0.00112007
103581031	TC11003042.hg.1	TC11003042.hg.1	chr11	-	8032825	8038037	38	5212	8038037	CASC23	NA	NA	BC027619;TCONS_00019117-XLOC_009367;TCONS_00020038	NONCODE;RinnlincRNA;NONCODE	0.00137451
10363	TC15002639.hg.1	TC15002639.hg.1	chr15	-	77777399	77777941	30	542	77777941	HMG20A	NA	NA	AL355738	NONCODE	-0.00275758
10401	TC01001097.hg.1	TC01001097.hg.1	chr1	+	145575233	145586546	300	11313	145575233	PIAS3	PIAS3;PIAS3;PIAS3;PIAS3;PIAS3;PIAS3;PIAS3;PIAS3;PIAS3;PIAS3;PIAS3;PIAS3;PIAS3;PIAS3;PIAS3;PIAS3	PIAS3	NM_006099;ENST00000369298;ENST00000369299;ENST00000393045;ENST00000484423;AK125158;AK304039;BC001154;BC030556;OTTHUMT00000038533;OTTHUMT00000038534;OTTHUMT00000038535;OTTHUMT00000038536;OTTHUMT00000100711;OTTHUMT00000100712;OTTHUMT00000100713;uc001eoc.1;uc001eod.1;uc010oyy.1;OTTHUMT00000313736	RefSeq;ENSEMBL;ENSEMBL;ENSEMBL;ENSEMBL;GenBank;GenBank;GenBank;GenBank;Havanatranscript;Havanatranscript;Havanatranscript;Havanatranscript;Havanatranscript;Havanatranscript;Havanatranscript;UCSCGenes;UCSCGenes;UCSCGenes;Havanatranscript	0.0058828
104355137	TC13000024.hg.1	TC13000024.hg.1	chr13	+	20676840	20677369	30	529	20676840	LINC01072	LINC01072;LINC01072	LINC01072	ENST00000455848;OTTHUMT00000044048	ENSEMBL;NONCODE	-0.00274687
104355143	TC01000637.hg.1	TC01000637.hg.1	chr1	+	52516590	52518355	30	1765	52516590	TXNDC12-AS1	TXNDC12-AS1;TXNDC12-AS1	TXNDC12-AS1	ENST00000428794;OTTHUMT00000023823	ENSEMBL;Havanatranscript	-0.0149693
10461	TC02000701.hg.1	TC02000701.hg.1	chr2	+	112656056	112787138	364	131082	112656056	MERTK	MERTK;MERTK;MERTK;MERTK;MERTK;MERTK;MERTK;MERTK;MERTK;MERTK;MERTK	MERTK	NM_006343;ENST00000295408;ENST00000409780;ENST00000421804;BC114917;BC114918;OTTHUMT00000254046;OTTHUMT00000330446;OTTHUMT00000330447;OTTHUMT00000330448;OTTHUMT00000330449;uc002thk.1;uc002thl.1;ENST00000393237	RefSeq;ENSEMBL;ENSEMBL;ENSEMBL;GenBank;GenBank;Havanatranscript;Havanatranscript;Havanatranscript;Havanatranscript;Havanatranscript;UCSCGenes;UCSCGenes;ENSEMBL	0.00638586
10509	TC15000858.hg.1	TC15000858.hg.1	chr15	+	90728152	90772911	242	44759	90728152	SEMA4B	SEMA4B;SEMA4B;SEMA4B;SEMA4B;SEMA4B;SEMA4B;SEMA4B;SEMA4B;SEMA4B;SEMA4B	SEMA4B	NM_020210;NM_198925;ENST00000332496;ENST00000411539;ENST00000558065;BC110853;BC126438;BC144141;BX537671;uc002boy.3;uc002boz.3;uc002bpa.3;uc010uqd.2;ENST00000379122	RefSeq;RefSeq;ENSEMBL;ENSEMBL;ENSEMBL;GenBank;GenBank;GenBank;GenBank;UCSCGenes;UCSCGenes;UCSCGenes;UCSCGenes;ENSEMBL	-0.00849472
105369748	TC12000339.hg.1	TC12000339.hg.1	chr12	+	48099868	48136077	100	36209	48099868	LOC105369748	;;;;;;;;AL831948	AL831948	AL831948;AL831948;ENST00000547799;ENST00000552133;ENST00000552502;ENST00000553045;ENST00000547799;ENST00000552133;ENST00000552502;ENST00000553045;uc001rpv.3	NONCODE;GenBank;ENSEMBL;ENSEMBL;ENSEMBL;ENSEMBL;NONCODE;NONCODE;NONCODE;NONCODE;UCSCGenes	0.0114327
105369748	TC12002338.hg.1	TC12002338.hg.1	chr12	+	48099868	48136077	120	36209	48099868	LOC105369748	;;;		AL831948;ENST00000547799;ENST00000552133;ENST00000552502;ENST00000553045	NONCODE;NONCODE;NONCODE;NONCODE;NONCODE	0.0002624
105370149	TC13000544.hg.1	TC13000544.hg.1	chr13	-	31942974	31943035	30	61	31943035	LOC105370149	DQ599653;DQ599653	DQ599653	DQ599653;DQ599653;uc001utr.1;uc001utr.1	NONCODE;GenBank;UCSCGenes;NONCODE	0.00051769
105371022	TC15002408.hg.1	TC15002408.hg.1	chr15	+	100516686	100520979	40	4293	100516686	LOC105371022	NA	NA	AK093043	NONCODE	-0.000991417
105372255	TC19001090.hg.1	TC19001090.hg.1	chr19	-	6189739	6199540	30	9801	6199540	LOC105372255	AK056073	AK056073	AK056073;uc002mej.1	GenBank;UCSCGenes	0.00538432
105372633	TC20001243.hg.1	TC20001243.hg.1	chr20	+	45062280	45074923	30	12643	45062280	LOC105372633	NA	NA	AK054905	NONCODE	-0.000886227
105372751;400860	TC21000070.hg.1	TC21000070.hg.1	chr21	+	25801054	25920256	85	119202	25801054	LOC105372751;FLJ42200	;;AK124194;;;	AK124194	ENST00000453784;AK124194;ENST00000453784;OTTHUMT00000171137;OTTHUMT00000171138;OTTHUMT00000171139;uc002yli.1	ENSEMBL;GenBank;NONCODE;NONCODE;NONCODE;NONCODE;UCSCGenes	0.0494683
105372779	TC21000919.hg.1	TC21000919.hg.1	chr21	-	33678775	33681048	30	2273	33681048	LOC105372779	NA	NA	BC034802	NONCODE	-0.00268066
105374676	TC05002299.hg.1	TC05002299.hg.1	chr5	+	20611949	20937800	120	325851	20611949	LOC105374676	NA	NA	AK093362	NONCODE	0.000713719
105376382	TC10000997.hg.1	TC10000997.hg.1	chr10	-	5636954	5638081	30	1127	5638081	LOC105376382	;		ENST00000478294;OTTHUMT00000046559	ENSEMBL;NONCODE	-0.0252678
105377134	TC21000023.hg.1	TC21000023.hg.1	chr21	+	15399742	15516860	67	117118	15399742	LOC105377134	;BC024173;BC048201;;;	BC024173;BC048201	BC024173;BC048201;ENST00000428809;OTTHUMT00000157812;OTTHUMT00000157813;OTTHUMT00000157814;uc002yjk.2;uc002yjk.3;uc002yjl.2;uc002yjl.3	GenBankHTC;GenBank;ENSEMBL;Havanatranscript;Havanatranscript;Havanatranscript;NONCODE;UCSCGenes;NONCODE;UCSCGenes	0.00368886
105377276	TC04001288.hg.1	TC04001288.hg.1	chr4	-	75144014	75196255	30	52241	75196255	LOC105377276	BC016361	BC016361	BC016361;BC016361;ENST00000513776;uc003hhv.1	NONCODE;GenBank;ENSEMBL;UCSCGenes	-0.000302738
105378052;---	TC06001087.hg.1	TC06001087.hg.1	chr6	+	150255663	150257455	50	1792	150255663	LOC105378052;RP11-244K5.4	BC040898;	BC040898	ENST00000421363;BC040898;BC040898;OTTHUMT00000042672;OTTHUMT00000042673;uc003qnn.2;uc003qnn.3	ENSEMBL;NONCODE;GenBank;Havanatranscript;Havanatranscript;NONCODE;UCSCGenes	-0.00133156
105378138	TC06002325.hg.1	TC06002325.hg.1	chr6	-	168700863	168702794	29	1931	168702794	LOC105378138	;		ENST00000445442;OTTHUMT00000043192	ENSEMBL;NONCODE	-0.0142035
105379239	TC08000963.hg.1	TC08000963.hg.1	chr8	-	10713595	10716946	30	3351	10716946	LOC105379239	AK094525	AK094525	AK094525;OTTHUMT00000375785;uc003wtj.3	GenBank;Havanatranscript;UCSCGenes	0.007631
105416157	TC20000451.hg.1	TC20000451.hg.1	chr20	+	56285239	56287808	30	2569	56285239	NKILA	AK056098	AK056098	AK056098;AK056098;uc002xyu.1	NONCODE;GenBank;UCSCGenes	0.00100582
1057	TC09002316.hg.1	TC09002316.hg.1	chr9	+	135957926	135962478	50	4552	135957926	CELP	CELP	CELP	NR_001275	NONCODE	-0.00433817
10587	TC22000502.hg.1	TC22000502.hg.1	chr22	-	19863040	19929359	394	66319	19929359	TXNRD2	TXNRD2;TXNRD2;TXNRD2;TXNRD2;TXNRD2;TXNRD2;TXNRD2;TXNRD2;TXNRD2;TXNRD2;TXNRD2;TXNRD2;TXNRD2;TXNRD2;TXNRD2;TXNRD2;TXNRD2;TXNRD2;TXNRD2;TXNRD2;TXNRD2;TXNRD2;TXNRD2;TXNRD2;TXNRD2;TXNRD2;TXNRD2;TXNRD2;TXNRD2;TXNRD2;TXNRD2	TXNRD2	NM_006440;ENST00000334363;ENST00000400518;ENST00000400519;ENST00000400521;ENST00000400525;ENST00000542719;AF201385;AK094698;AK097708;BC099923;BC117354;CR749428;OTTHUMT00000314903;OTTHUMT00000314904;OTTHUMT00000314905;OTTHUMT00000314906;OTTHUMT00000314907;OTTHUMT00000314917;OTTHUMT00000314919;OTTHUMT00000314920;OTTHUMT00000314921;OTTHUMT00000314922;OTTHUMT00000314923;OTTHUMT00000314924;OTTHUMT0000…	RefSeq;ENSEMBL;ENSEMBL;ENSEMBL;ENSEMBL;ENSEMBL;ENSEMBL;GenBank;GenBank;GenBank;GenBank;GenBank;GenBankHTC;Havanatranscript;Havanatranscript;Havanatranscript;Havanatranscript;Havanatranscript;Havanatranscript;Havanatranscript;Havanatranscript;Havanatranscript;Havanatranscript;Havanatranscript;Havanatranscript;Havanatranscript;Havanatranscript;Havanatranscript;Havanatranscript;UCSCGenes;UCSCGenes;U…	0.0076213
10617	TC02000447.hg.1	TC02000447.hg.1	chr2	+	74056043	74100786	311	44743	74056043	STAMBP	STAMBP;STAMBP;STAMBP;STAMBP;STAMBP;STAMBP;STAMBP;STAMBP;STAMBP;STAMBP;STAMBP;STAMBP;STAMBP;STAMBP;STAMBP;STAMBP;STAMBP;STAMBP;STAMBP;STAMBP	STAMBP	NM_006463;NM_201647;NM_213622;ENST00000339566;ENST00000394070;ENST00000394073;ENST00000409707;ENST00000486458;ENST00000536064;BC007682;BC065574;BC101467;BC101469;OTTHUMT00000252048;OTTHUMT00000328094;OTTHUMT00000328095;OTTHUMT00000328096;OTTHUMT00000328097;OTTHUMT00000328098;OTTHUMT00000328101;OTTHUMT00000328103;uc002sjs.3;uc002sju.3;uc002sjv.3;ENST00000539933	RefSeq;RefSeq;RefSeq;ENSEMBL;ENSEMBL;ENSEMBL;ENSEMBL;ENSEMBL;ENSEMBL;GenBank;GenBank;GenBank;GenBank;Havanatranscript;Havanatranscript;Havanatranscript;Havanatranscript;Havanatranscript;Havanatranscript;Havanatranscript;Havanatranscript;UCSCGenes;UCSCGenes;UCSCGenes;ENSEMBL	-0.000883745
10632	TC11002898.hg.1	TC11002898.hg.1	chr11	+	118272104	118280562	40	8458	118272104	ATP5L	NA	NA	NR_033759	NONCODE	-0.0179206
10643	TC07001194.hg.1	TC07001194.hg.1	chr7	-	23349828	23510086	389	160258	23510086	IGF2BP3	IGF2BP3;IGF2BP3;IGF2BP3;IGF2BP3;IGF2BP3;IGF2BP3;IGF2BP3;IGF2BP3;IGF2BP3;IGF2BP3;IGF2BP3;IGF2BP3;IGF2BP3;IGF2BP3;IGF2BP3;IGF2BP3;IGF2BP3;IGF2BP3;IGF2BP3;IGF2BP3;IGF2BP3;IGF2BP3	IGF2BP3	NM_006547;ENST00000258729;ENST00000491719;BC051296;BC065269;BX648488;OTTHUMT00000250243;OTTHUMT00000327165;OTTHUMT00000327166;OTTHUMT00000327167;OTTHUMT00000327168;OTTHUMT00000327169;OTTHUMT00000327170;OTTHUMT00000327171;OTTHUMT00000327172;OTTHUMT00000327173;OTTHUMT00000327174;OTTHUMT00000327175;OTTHUMT00000327176;OTTHUMT00000327204;OTTHUMT00000327205;OTTHUMT00000327206;OTTHUMT00000327207;uc003sw…	RefSeq;ENSEMBL;ENSEMBL;GenBankHTC;GenBank;GenBankHTC;Havanatranscript;Havanatranscript;Havanatranscript;Havanatranscript;Havanatranscript;Havanatranscript;Havanatranscript;Havanatranscript;Havanatranscript;Havanatranscript;Havanatranscript;Havanatranscript;Havanatranscript;Havanatranscript;Havanatranscript;Havanatranscript;Havanatranscript;UCSCGenes;UCSCGenes;UCSCGenes	-0.111097
10654	TC01003297.hg.1	TC01003297.hg.1	chr1	-	154897208	154909484	60	12276	154909484	PMVK	PMVK;PMVK;PMVK	PMVK	NM_006556;ENST00000368467;BC006089;BC007694;OTTHUMT00000091088;uc001ffq.3	RefSeq;ENSEMBL;GenBank;GenBank;Havanatranscript;UCSCGenes	0.00416144
10675	TC03001369.hg.1	TC03001369.hg.1	chr3	-	47603728	47622282	120	18554	47622282	CSPG5	CSPG5;CSPG5;CSPG5;CSPG5;CSPG5;CSPG5;CSPG5;CSPG5;AK094639;CSPG5;CSPG5;CSPG5;CSPG5;CSPG5;CSPG5;CSPG5;CSPG5;CSPG5;CSPG5	CSPG5;AK094639	NM_001206942;NM_001206943;NM_001206944;NM_001206945;NM_006574;ENST00000264723;ENST00000383738;ENST00000456150;ENST00000465441;AF461088;AK094639;OTTHUMT00000257489;OTTHUMT00000257490;OTTHUMT00000345350;OTTHUMT00000345351;uc003crn.3;uc003cro.4;uc003crp.4;uc011bbb.2;uc021wxh.1;uc021wxi.1;uc003crm.3	RefSeq;RefSeq;RefSeq;RefSeq;RefSeq;ENSEMBL;ENSEMBL;ENSEMBL;ENSEMBL;GenBank;GenBank;Havanatranscript;Havanatranscript;Havanatranscript;Havanatranscript;UCSCGenes;UCSCGenes;UCSCGenes;UCSCGenes;UCSCGenes;UCSCGenes;UCSCGenes	0.00461646
10678	TC02000357.hg.1	TC02000357.hg.1	chr2	+	62423248	62451866	60	28618	62423248	B3GNT2	B3GNT2;B3GNT2;B3GNT2;B3GNT2;B3GNT2;B3GNT2	B3GNT2	NM_006577;ENST00000301998;ENST00000405767;BC030579;BC047933;OTTHUMT00000251606;OTTHUMT00000326543;uc002sbs.3;uc021vii.1	RefSeq;ENSEMBL;ENSEMBL;GenBank;GenBank;Havanatranscript;Havanatranscript;UCSCGenes;UCSCGenes	-0.00421212
10694	TC21000353.hg.1	TC21000353.hg.1	chr21	-	30428126	30446118	357	17992	30446118	CCT8	CCT8;CCT8;CCT8;CCT8;CCT8;CCT8;CCT8;CCT8;CCT8;CCT8;CCT8;CCT8;CCT8;CCT8;CCT8;CCT8;CCT8;CCT8;CCT8	CCT8	NM_006585;ENST00000286788;ENST00000470450;ENST00000540844;AK293705;AK298801;BC012584;BC072001;BC095470;OTTHUMT00000104070;OTTHUMT00000171822;OTTHUMT00000171823;OTTHUMT00000171824;OTTHUMT00000171825;OTTHUMT00000171826;OTTHUMT00000171827;OTTHUMT00000171828;OTTHUMT00000171829;OTTHUMT00000171830;uc002yna.3;uc002ynb.3;uc011acp.2;uc011acq.2;ENST00000389159;ENST00000542732	RefSeq;ENSEMBL;ENSEMBL;ENSEMBL;GenBank;GenBank;GenBank;GenBank;GenBank;Havanatranscript;Havanatranscript;Havanatranscript;Havanatranscript;Havanatranscript;Havanatranscript;Havanatranscript;Havanatranscript;Havanatranscript;Havanatranscript;UCSCGenes;UCSCGenes;UCSCGenes;UCSCGenes;ENSEMBL;ENSEMBL	0.00594156
10769	TC05001385.hg.1	TC05001385.hg.1	chr5	-	57749809	57756087	452	6278	57756087	PLK2	PLK2;PLK2;PLK2;PLK2;PLK2;PLK2;PLK2;PLK2;PLK2;PLK2;PLK2;PLK2;PLK2;PLK2;PLK2;PLK2;PLK2;PLK2;PLK2;PLK2	PLK2	NM_001252226;NM_006622;ENST00000274289;ENST00000502671;AK304746;BC013879;OTTHUMT00000214150;OTTHUMT00000367847;OTTHUMT00000367848;OTTHUMT00000367849;OTTHUMT00000367850;OTTHUMT00000367851;OTTHUMT00000367852;OTTHUMT00000367853;OTTHUMT00000367854;OTTHUMT00000367855;OTTHUMT00000367856;OTTHUMT00000367857;OTTHUMT00000367858;OTTHUMT00000367859;uc003jrn.3;uc011cql.1;uc021xyx.1;ENST00000442330;ENST0000053…	RefSeq;RefSeq;ENSEMBL;ENSEMBL;GenBank;GenBank;Havanatranscript;Havanatranscript;Havanatranscript;Havanatranscript;Havanatranscript;Havanatranscript;Havanatranscript;Havanatranscript;Havanatranscript;Havanatranscript;Havanatranscript;Havanatranscript;Havanatranscript;Havanatranscript;UCSCGenes;UCSCGenes;UCSCGenes;ENSEMBL;ENSEMBL	-0.0162202
1088	TC19001576.hg.1	TC19001576.hg.1	chr19	-	43084393	43099082	78	14689	43099082	CEACAM8	CEACAM8;CEACAM8;CEACAM8	CEACAM8	NM_001816;ENST00000244336;BC026263;OTTHUMT00000321430;uc002oud.2	RefSeq;ENSEMBL;GenBank;Havanatranscript;UCSCGenes	3.69e-05
11117	TC02000163.hg.1	TC02000163.hg.1	chr2	+	27301435	27309271	160	7836	27301435	EMILIN1	EMILIN1;EMILIN1;EMILIN1;EMILIN1;EMILIN1;EMILIN1	EMILIN1	NM_007046;ENST00000380320;AK307539;BC017284;BC136279;BC142688;OTTHUMT00000214185;OTTHUMT00000324734;uc002rii.4;uc002rik.4;uc010eyq.2;ENST00000544143	RefSeq;ENSEMBL;GenBankHTC;GenBank;GenBank;GenBank;Havanatranscript;Havanatranscript;UCSCGenes;UCSCGenes;UCSCGenes;ENSEMBL	-0.0090318
1117	TC01000972.hg.1	TC01000972.hg.1	chr1	+	111743393	111786062	213	42669	111743393	CHI3L2	CHI3L2;CHI3L2;CHI3L2;CHI3L2;CHI3L2;CHI3L2;CHI3L2;CHI3L2;CHI3L2;CHI3L2;CHI3L2;CHI3L2;CHI3L2;CHI3L2;CHI3L2;CHI3L2;CHI3L2;CHI3L2;CHI3L2;CHI3L2;CHI3L2	CHI3L2	NM_001025197;NM_001025199;NM_004000;ENST00000369744;ENST00000369748;ENST00000445067;ENST00000466741;ENST00000524472;ENST00000529459;BC011460;OTTHUMT00000033669;OTTHUMT00000033670;OTTHUMT00000033672;OTTHUMT00000033673;OTTHUMT00000034453;OTTHUMT00000034454;OTTHUMT00000098099;OTTHUMT00000098100;OTTHUMT00000098101;uc001eam.3;uc001ean.3;uc001eao.3	RefSeq;RefSeq;RefSeq;ENSEMBL;ENSEMBL;ENSEMBL;ENSEMBL;ENSEMBL;ENSEMBL;GenBank;Havanatranscript;Havanatranscript;Havanatranscript;Havanatranscript;Havanatranscript;Havanatranscript;Havanatranscript;Havanatranscript;Havanatranscript;UCSCGenes;UCSCGenes;UCSCGenes	-0.00517672
112724	TC19001855.hg.1	TC19001855.hg.1	chr19	-	55551816	55553382	30	1566	55553382	RDH13	AL833150;AL833150	AL833150	AL833150;uc002qim.1;uc002qim.1	GenBankHTC;UCSCGenes;NONCODE	-0.00120175
1129	TC07002612.hg.1	TC07002612.hg.1	chr7	+	136553833	136699701	48	145868	136553833	CHRM2	NA	NA	AY219703;AY456125;AY456127	NONCODE;NONCODE;NONCODE	0.00116455
11314	TC17000831.hg.1	TC17000831.hg.1	chr17	+	72462522	72480933	100	18411	72462522	CD300A	CD300A;CD300A;CD300A;CD300A;CD300A;CD300A;CD300A;CD300A	CD300A	NM_007261;ENST00000310828;ENST00000360141;ENST00000361933;ENST00000392625;AF161346;AJ010102;AJ010103;BC032352;OTTHUMT00000145091;OTTHUMT00000145092;OTTHUMT00000145093;uc002jkv.3;uc002jkw.3;uc010dfr.3;uc010dfs.3	RefSeq;ENSEMBL;ENSEMBL;ENSEMBL;ENSEMBL;GenBank;GenBank;GenBank;GenBank;Havanatranscript;Havanatranscript;Havanatranscript;UCSCGenes;UCSCGenes;UCSCGenes;UCSCGenes	-0.0137878
11329	TC06001675.hg.1	TC06001675.hg.1	chr6	-	36461669	36515256	160	53587	36515256	STK38	STK38;STK38;STK38;STK38;STK38	STK38	NM_007271;ENST00000229812;AK312559;BC012085;BC095413;OTTHUMT00000040346;uc003omg.3;uc003omh.3;uc003omi.3;Z35102	RefSeq;ENSEMBL;GenBankHTC;GenBank;GenBank;Havanatranscript;UCSCGenes;UCSCGenes;UCSCGenes;GenBank	-0.0269753
114571	TC11000570.hg.1	TC11000570.hg.1	chr11	+	63137261	63177766	120	40505	63137261	SLC22A9	SLC22A9;SLC22A9;SLC22A9;SLC22A9;SLC22A9	SLC22A9	NM_080866;ENST00000279178;BC022379;BC126288;uc001nww.3;uc001nwx.3;ENST00000310969	RefSeq;ENSEMBL;GenBank;GenBank;UCSCGenes;UCSCGenes;ENSEMBL	0.00326686
114804	TC17001895.hg.1	TC17001895.hg.1	chr17	-	74138534	74236390	240	97856	74236390	RNF157	RNF157;RNF157;RNF157;RNF157;RNF157;RNF157	RNF157	NM_052916;ENST00000269391;ENST00000319945;OTTHUMT00000255874;uc002jqz.3;ENST00000301610;uc002jra.3	RefSeq;ENSEMBL;ENSEMBL;Havanatranscript;UCSCGenes;ENSEMBL;UCSCGenes	0.029797
114990	TC16000129.hg.1	TC16000129.hg.1	chr16	+	4421849	4433529	30	11680	4421849	VASN	VASN;VASN;VASN;VASN	VASN	NM_138440;ENST00000304735;BC068575;OTTHUMT00000251632;uc002cwj.1;uc021tch.1	RefSeq;ENSEMBL;GenBank;Havanatranscript;UCSCGenes;UCSCGenes	0.0124238
115196	TC19000058.hg.1	TC19000058.hg.1	chr19	+	2819872	2836733	78	16861	2819872	ZNF554	ZNF554;ZNF554;ZNF554;ZNF554	ZNF554	NM_001102651;ENST00000317243;BC047777;uc002lwm.2;uc002lwl.2	RefSeq;ENSEMBL;GenBank;UCSCGenes;UCSCGenes	-0.00325755
115817	TC14000973.hg.1	TC14000973.hg.1	chr14	-	24759804	24769039	140	9235	24769039	DHRS1	DHRS1;DHRS1;DHRS1;DHRS1;DHRS1;DHRS1;DHRS1;DHRS1;DHRS1;DHRS1	DHRS1	NM_001136050;NM_138452;ENST00000288111;ENST00000396813;ENST00000559088;AK126383;BC014057;BC015943;OTTHUMT00000073168;OTTHUMT00000073170;uc001woj.2;uc001wok.3;uc010aln.2	RefSeq;RefSeq;ENSEMBL;ENSEMBL;ENSEMBL;GenBank;GenBank;GenBank;Havanatranscript;Havanatranscript;UCSCGenes;UCSCGenes;UCSCGenes	0.00433549
116349	TC05001094.hg.1	TC05001094.hg.1	chr5	-	441613	443275	20	1662	443275	EXOC3-AS1	C5orf55;C5orf55;C5orf55	C5orf55	NM_138464;BC029796;ENST00000408966;OTTHUMT00000368033;uc010ita.3	RefSeq;GenBank;ENSEMBL;Havanatranscript;UCSCGenes	-0.00484731
116519	TC11002325.hg.1	TC11002325.hg.1	chr11	-	116660083	116663136	78	3053	116663136	APOA5	APOA5;APOA5;APOA5;APOA5;APOA5;APOA5;APOA5;APOA5;APOA5	APOA5	NM_001166598;NM_052968;ENST00000227665;ENST00000542499;AK308047;BC101787;uc001ppr.3;uc009yzf.3;uc009yzg.3;OTTHUMT00000106285;OTTHUMT00000142231	RefSeq;RefSeq;ENSEMBL;ENSEMBL;GenBankHTC;GenBank;UCSCGenes;UCSCGenes;UCSCGenes;Havanatranscript;Havanatranscript	-0.0049128
119369	TC10002773.hg.1	TC10002773.hg.1	chr10	-	92911761	92912837	30	1076	92912837	NUDT9P1	NA	NA	NR_002779	NONCODE	-0.000162545
123016	TC14000538.hg.1	TC14000538.hg.1	chr14	+	89290497	89344335	211	53838	89290497	TTC8	TTC8;TTC8;TTC8;TTC8;TTC8;TTC8;TTC8;TTC8;TTC8;TTC8;TTC8;TTC8;TTC8;TTC8;TTC8;TTC8;TTC8;TTC8	TTC8	NM_144596;NM_198309;NM_198310;ENST00000338104;ENST00000345383;ENST00000346301;ENST00000354441;ENST00000358622;ENST00000380656;ENST00000536576;BC026351;BC095433;BX161472;BX247959;BX248071;uc001xxi.3;uc001xxj.3;uc001xxk.3;uc010atg.1;uc010ath.3;uc010ati.3;uc010atj.3;ENST00000343648;uc001xxl.3	RefSeq;RefSeq;RefSeq;ENSEMBL;ENSEMBL;ENSEMBL;ENSEMBL;ENSEMBL;ENSEMBL;ENSEMBL;GenBank;GenBank;GenBankHTC;GenBankHTC;GenBankHTC;UCSCGenes;UCSCGenes;UCSCGenes;UCSCGenes;UCSCGenes;UCSCGenes;UCSCGenes;ENSEMBL;UCSCGenes	0.00571721
124220	TC16000087.hg.1	TC16000087.hg.1	chr16	+	2880170	2882285	50	2115	2880170	ZG16B	ZG16B;ZG16B;ZG16B	ZG16B	NM_145252;ENST00000382280;BC009722;OTTHUMT00000250912;uc002cru.3	RefSeq;ENSEMBL;GenBank;Havanatranscript;UCSCGenes	-0.000681001
124535	TC17001733.hg.1	TC17001733.hg.1	chr17	-	56497528	56565759	83	68231	56565759	HSF5	HSF5;HSF5;HSF5	HSF5	NM_001080439;ENST00000323777;BC033017;BC033020;BC115385;uc002iwi.1;ENST00000412540	RefSeq;ENSEMBL;GenBank;GenBank;GenBank;UCSCGenes;ENSEMBL	-0.0024898
125997	TC19000123.hg.1	TC19000123.hg.1	chr19	+	7049350	7051781	40	2431	7049350	MBD3L2	MBD3L2;MBD3L2;MBD3L2	MBD3L2	NM_144614;ENST00000381393;uc010dvf.1;ENST00000412046	RefSeq;ENSEMBL;UCSCGenes;ENSEMBL	0.00730471
126321	TC19002294.hg.1	TC19002294.hg.1	chr19	-	3544181	3557567	30	13386	3557567	MFSD12	NA	NA	BC094804	NONCODE	0.00553682
127540	TC01004307.hg.1	TC01004307.hg.1	chr1	+	34329680	34330392	30	712	34329680	HMGB4	HMGB4	HMGB4	NR_033264	NONCODE	-0.000410754
128178	TC01001953.hg.1	TC01001953.hg.1	chr1	+	236511562	236648026	140	136464	236511562	EDARADD	EDARADD;EDARADD;EDARADD;EDARADD;EDARADD;EDARADD;EDARADD;EDARADD;EDARADD	EDARADD	NM_080738;NM_145861;ENST00000334232;ENST00000359362;BC128082;OTTHUMT00000096368;OTTHUMT00000096369;OTTHUMT00000096370;uc001hxu.1;uc001hxv.1	RefSeq;RefSeq;ENSEMBL;ENSEMBL;GenBank;Havanatranscript;Havanatranscript;Havanatranscript;UCSCGenes;UCSCGenes	0.00851194
128817	TC20001157.hg.1	TC20001157.hg.1	chr20	+	23421035	23425499	30	4464	23421035	CSTL1	NA	NA	FJ895880	NONCODE	-0.000119114
129049	TC22001029.hg.1	TC22001029.hg.1	chr22	+	25202286	25289490	172	87204	25202286	SGSM1	NA	NA	BC036915	NONCODE	0.00925342
130399	TC02002453.hg.1	TC02002453.hg.1	chr2	-	158383279	158485517	140	102238	158485517	ACVR1C	ACVR1C;ACVR1C;ACVR1C;ACVR1C;ACVR1C;ACVR1C;ACVR1C;ACVR1C;ACVR1C;ACVR1C;ACVR1C;ACVR1C;ACVR1C;ACVR1C;ACVR1C;ACVR1C	ACVR1C	NM_001111031;NM_001111032;NM_001111033;NM_145259;ENST00000243349;ENST00000335450;ENST00000348328;ENST00000409680;BC022530;OTTHUMT00000254924;OTTHUMT00000332946;OTTHUMT00000332947;OTTHUMT00000332948;uc002tzk.4;uc002tzl.4;uc010foe.3;uc010fof.3	RefSeq;RefSeq;RefSeq;RefSeq;ENSEMBL;ENSEMBL;ENSEMBL;ENSEMBL;GenBank;Havanatranscript;Havanatranscript;Havanatranscript;Havanatranscript;UCSCGenes;UCSCGenes;UCSCGenes;UCSCGenes	0.0132122
131118	TC03003232.hg.1	TC03003232.hg.1	chr3	-	180701498	180707562	80	6064	180707562	DNAJC19	NA	NA	NR_033721;NR_033724;NR_033725	NONCODE;NONCODE;NONCODE	-0.011648
135228	TC06000737.hg.1	TC06000737.hg.1	chr6	+	74405508	74538041	391	132533	74405508	CD109	CD109;CD109;CD109;CD109;CD109;CD109;CD109;CD109;CD109;CD109;CD109;CD109	CD109	NM_001159587;NM_001159588;NM_133493;ENST00000287097;ENST00000422508;ENST00000437994;ENST00000474094;OTTHUMT00000041230;OTTHUMT00000041231;uc003php.3;uc003phq.3;uc010kba.3	RefSeq;RefSeq;RefSeq;ENSEMBL;ENSEMBL;ENSEMBL;ENSEMBL;Havanatranscript;Havanatranscript;UCSCGenes;UCSCGenes;UCSCGenes	-0.00165262
135458	TC06001208.hg.1	TC06001208.hg.1	chr6	-	655939	656964	30	1025	656964	HUS1B	HUS1B;HUS1B;HUS1B	HUS1B	NM_148959;ENST00000380907;BC101697;OTTHUMT00000205617;uc003mtg.3	RefSeq;ENSEMBL;GenBank;Havanatranscript;UCSCGenes	-0.0150998
1376	TC01000651.hg.1	TC01000651.hg.1	chr1	+	53662101	53679869	90	17768	53662101	CPT2	CPT2;CPT2;CPT2;CPT2;CPT2	CPT2	NM_000098;ENST00000371486;ENST00000468572;BC002445;OTTHUMT00000024757;OTTHUMT00000024758;uc001cvb.4	RefSeq;ENSEMBL;ENSEMBL;GenBank;Havanatranscript;Havanatranscript;UCSCGenes	0.00990398
1380	TC01001737.hg.1	TC01001737.hg.1	chr1	+	207627575	207663240	275	35665	207627575	CR2	CR2;CR2;CR2;CR2;CR2;CR2;CR2;CR2;CR2;CR2;CR2;CR2;CR2;CR2;CR2;CR2;CR2	CR2	NM_001006658;NM_001877;ENST00000367057;ENST00000367058;ENST00000367059;ENST00000485707;BC032548;BC090937;BC136394;OTTHUMT00000088274;OTTHUMT00000088325;OTTHUMT00000088326;OTTHUMT00000088327;OTTHUMT00000088328;OTTHUMT00000088330;S62696;S62696;uc001hfv.3;uc001hfw.3;uc009xch.3;uc009xci.1;ENST00000458541	RefSeq;RefSeq;ENSEMBL;ENSEMBL;ENSEMBL;ENSEMBL;GenBankHTC;GenBank;GenBank;Havanatranscript;Havanatranscript;Havanatranscript;Havanatranscript;Havanatranscript;Havanatranscript;NONCODE;GenBank;UCSCGenes;UCSCGenes;UCSCGenes;UCSCGenes;ENSEMBL	-0.0637922
1380	TC01004988.hg.1	TC01004988.hg.1	chr1	+	207646500	207647169	30	669	207646500	CR2	NA	NA	M26317	NONCODE	-0.0169953
138046	TC08000526.hg.1	TC08000526.hg.1	chr8	+	85095022	85834079	257	739057	85095022	RALYL	RALYL;RALYL;RALYL;RALYL;RALYL;RALYL;RALYL;RALYL;RALYL;RALYL;RALYL;RALYL;RALYL;RALYL;RALYL;RALYL;RALYL;RALYL;RALYL;RALYL;RALYL;RALYL;RALYL;RALYL;RALYL;RALYL;RALYL;RALYL;RALYL	RALYL	NM_001100391;NM_001100392;NM_001100393;NM_173848;ENST00000517638;ENST00000517988;ENST00000518566;ENST00000521268;ENST00000521376;ENST00000521695;ENST00000522455;ENST00000523850;AK095026;AK123437;BC031090;OTTHUMT00000379448;OTTHUMT00000379449;OTTHUMT00000379450;OTTHUMT00000379455;OTTHUMT00000379456;OTTHUMT00000379457;OTTHUMT00000379458;OTTHUMT00000379459;OTTHUMT00000379460;OTTHUMT00000380576;OTTHU…	RefSeq;RefSeq;RefSeq;RefSeq;ENSEMBL;ENSEMBL;ENSEMBL;ENSEMBL;ENSEMBL;ENSEMBL;ENSEMBL;ENSEMBL;GenBank;GenBank;GenBank;Havanatranscript;Havanatranscript;Havanatranscript;Havanatranscript;Havanatranscript;Havanatranscript;Havanatranscript;Havanatranscript;Havanatranscript;Havanatranscript;Havanatranscript;UCSCGenes;UCSCGenes;UCSCGenes;UCSCGenes;UCSCGenes;UCSCGenes	-0.00737223
138307	TC09001741.hg.1	TC09001741.hg.1	chr9	-	139648838	139652731	162	3893	139652731	LCN8	LCN8;LCN8;LCN8;LCN8;LCN8;LCN8;LCN8;LCN8;LCN8	LCN8	NM_178469;ENST00000371688;ENST00000482893;AK126902;BC042109;BC130465;OTTHUMT00000055109;OTTHUMT00000055110;OTTHUMT00000055111;OTTHUMT00000055112;uc004cja.3;uc004cjb.1;uc004cjc.1	RefSeq;ENSEMBL;ENSEMBL;GenBank;GenBankHTC;GenBank;Havanatranscript;Havanatranscript;Havanatranscript;Havanatranscript;UCSCGenes;UCSCGenes;UCSCGenes	0.00830841
140881	TC20000004.hg.1	TC20000004.hg.1	chr20	+	207899	210527	30	2628	207899	DEFB129	DEFB129;DEFB129;DEFB129	DEFB129	NM_080831;ENST00000246105;BC070359;OTTHUMT00000077430;uc002wda.3	RefSeq;ENSEMBL;GenBank;Havanatranscript;UCSCGenes	-0.0188519
143282	TC10001525.hg.1	TC10001525.hg.1	chr10	-	93666345	93669258	50	2913	93669258	FGFBP3	FGFBP3;FGFBP3;FGFBP3;FGFBP3	FGFBP3	NM_152429;ENST00000311575;BC025966;OTTHUMT00000049379;uc001khq.4;uc021pwg.1	RefSeq;ENSEMBL;GenBank;Havanatranscript;UCSCGenes;UCSCGenes	0.00240308
143879	TC11002255.hg.1	TC11002255.hg.1	chr11	-	105921825	105948492	93	26667	105948492	KBTBD3	KBTBD3;KBTBD3;KBTBD3;KBTBD3;KBTBD3;KBTBD3;KBTBD3;KBTBD3;KBTBD3	KBTBD3	NM_152433;NM_198439;ENST00000526793;ENST00000531482;ENST00000531837;ENST00000534815;BC117466;BX647830;uc001pja.3;uc001pjb.3;uc009yxm.3	RefSeq;RefSeq;ENSEMBL;ENSEMBL;ENSEMBL;ENSEMBL;GenBank;GenBank;UCSCGenes;UCSCGenes;UCSCGenes	-0.00415326
144125	TC11000137.hg.1	TC11000137.hg.1	chr11	+	6806248	6807245	30	997	6806248	OR2AG1	OR2AG1;OR2AG1;OR2AG1	OR2AG1	NM_001004489;ENST00000307401;BC151143;uc001mer.2	RefSeq;ENSEMBL;GenBank;UCSCGenes	-0.00227423
145553	TC14002342.hg.1	TC14002342.hg.1	chr14	-	24681945	24685276	226	3331	24685276	MDP1	MDP1;MDP1;MDP1;MDP1;MDP1;MDP1;MDP1;MDP1;MDP1;MDP1;MDP1;MDP1	MDP1	NM_001199821;NM_001199822;NM_138476;ENST00000288087;ENST00000396833;ENST00000532557;BC046912;BC051382;OTTHUMT00000073144;OTTHUMT00000257367;uc001wnl.2;uc001wnm.2;uc021rrl.1;uc001wnk.2	RefSeq;RefSeq;RefSeq;ENSEMBL;ENSEMBL;ENSEMBL;GenBank;GenBank;Havanatranscript;Havanatranscript;UCSCGenes;UCSCGenes;UCSCGenes;UCSCGenes	-0.00223702
145678	TC15002657.hg.1	TC15002657.hg.1	chr15	-	81283145	81285462	30	2317	81285462	LOC145678	NA	NA	AL109682	NONCODE	-0.00297082
145694	TC15002598.hg.1	TC15002598.hg.1	chr15	-	69689243	69707368	30	18125	69707368	LOC145694	NA	NA	AK056793	NONCODE	0.0031828
145858	TC15000885.hg.1	TC15000885.hg.1	chr15	+	93014884	93044347	60	29463	93014884	C15orf32	C15orf32;C15orf32;C15orf32;C15orf32	C15orf32	NM_153040;BC109252;BC109253;OTTHUMT00000313527;uc002brc.1;uc010bod.1;ENST00000333334	RefSeq;GenBank;GenBank;Havanatranscript;UCSCGenes;UCSCGenes;ENSEMBL	-0.00910549
147947	TC19000921.hg.1	TC19000921.hg.1	chr19	+	56879468	56891196	100	11728	56879468	ZNF542P	ZNF542;ZNF542;ZNF542;ZNF542;ZNF542;ZNF542;ZNF542;ZNF542;ZNF542;ZNF542;ZNF542	ZNF542	NR_003127;NR_024055;NR_024056;NR_024057;NR_033418;ENST00000490123;AK297170;NR_003127;NR_024056;uc002qmu.4;uc002qmv.4;uc010etj.3;uc010etk.3;uc010ygj.2;uc010ygk.2	RefSeq;RefSeq;RefSeq;RefSeq;RefSeq;ENSEMBL;GenBank;NONCODE;NONCODE;UCSCGenes;UCSCGenes;UCSCGenes;UCSCGenes;UCSCGenes;UCSCGenes	-0.025061
148189	TC19001376.hg.1	TC19001376.hg.1	chr19	-	28221181	28237138	30	15957	28237138	LINC00662	AK094188	AK094188	AK094188;AK094188;uc002nrw.1	NONCODE;GenBank;UCSCGenes	0.00336343
148930	TC01002621.hg.1	TC01002621.hg.1	chr1	-	47011316	47017199	90	5883	47017199	KNCN	KNCN;KNCN;KNCN;KNCN;KNCN;KNCN;KNCN;KNCN	KNCN	NM_001097611;ENST00000396314;ENST00000481882;ENST00000524908;BC101298;OTTHUMT00000021919;OTTHUMT00000316334;uc001cpy.2;uc009vyh.1	RefSeq;ENSEMBL;ENSEMBL;ENSEMBL;GenBank;Havanatranscript;Havanatranscript;UCSCGenes;UCSCGenes	-0.0103953
1491	TC01000757.hg.1	TC01000757.hg.1	chr1	+	70876901	70905534	184	28633	70876901	CTH	CTH;CTH;CTH;CTH;CTH;CTH;CTH;CTH;CTH;CTH;CTH;CTH;CTH;CTH;CTH	CTH	NM_001190463;NM_001902;NM_153742;ENST00000346806;ENST00000370938;ENST00000411986;ENST00000464926;AK310269;BC015807;OTTHUMT00000025918;OTTHUMT00000025919;OTTHUMT00000025920;OTTHUMT00000025921;uc001dfd.3;uc001dfe.3;uc009wbl.2;uc010oqq.2	RefSeq;RefSeq;RefSeq;ENSEMBL;ENSEMBL;ENSEMBL;ENSEMBL;GenBankHTC;GenBank;Havanatranscript;Havanatranscript;Havanatranscript;Havanatranscript;UCSCGenes;UCSCGenes;UCSCGenes;UCSCGenes	0.000223922
149297	TC01003469.hg.1	TC01003469.hg.1	chr1	-	166026674	166136206	110	109532	166136206	FAM78B	FAM78B;FAM78B;FAM78B;FAM78B;FAM78B;FAM78B;FAM78B;FAM78B;FAM78B;FAM78B;FAM78B	FAM78B	NM_001017961;ENST00000338353;ENST00000354422;AB593134;AK299946;BC032900;BC114214;OTTHUMT00000083937;OTTHUMT00000343106;OTTHUMT00000343107;OTTHUMT00000343108;uc010plc.2;uc021pee.1;uc021pef.1;uc001gdq.3	RefSeq;ENSEMBL;ENSEMBL;GenBank;GenBank;GenBank;GenBank;Havanatranscript;Havanatranscript;Havanatranscript;Havanatranscript;UCSCGenes;UCSCGenes;UCSCGenes;UCSCGenes	0.0009844
1493	TC02003774.hg.1	TC02003774.hg.1	chr2	+	204732667	204736125	30	3458	204732667	CTLA4	NA	NA	AF486806	NONCODE	-0.00471628
150291	TC22000219.hg.1	TC22000219.hg.1	chr22	+	31318295	31328436	80	10141	31318295	MORC2-AS1	MORC2-AS1;MORC2-AS1;MORC2-AS1;MORC2-AS1;MORC2-AS1;MORC2-AS1;MORC2-AS1;MORC2-AS1;MORC2-AS1	MORC2-AS1	NR_026920;ENST00000422995;ENST00000432624;ENST00000441558;BC042980;NR_026920;uc003ajd.3;OTTHUMT00000316779;OTTHUMT00000316780;OTTHUMT00000321721;uc003ajc.3	RefSeq;ENSEMBL;ENSEMBL;ENSEMBL;GenBank;NONCODE;UCSCGenes;Havanatranscript;Havanatranscript;Havanatranscript;UCSCGenes	-0.00777064
1508	TC08000980.hg.1	TC08000980.hg.1	chr8	-	11700033	11725738	320	25705	11725738	CTSB	CTSB;CTSB;CTSB;CTSB;CTSB;CTSB;CTSB;CTSB;CTSB;CTSB;CTSB;CTSB;CTSB;CTSB;CTSB;CTSB;CTSB;CTSB;CTSB;CTSB;CTSB;CTSB;CTSB;CTSB;CTSB	CTSB	NM_001908;NM_147780;NM_147781;NM_147782;NM_147783;ENST00000345125;ENST00000353047;ENST00000453527;ENST00000525076;ENST00000530640;ENST00000531089;ENST00000533455;ENST00000534510;AK097384;AK297687;BC010240;BC095408;BX647765;BX648239;OTTHUMT00000207586;uc003wul.3;uc003wum.3;uc003wun.3;uc003wuo.3;uc003wup.3;uc003wuq.3;uc003wuu.3;uc010lsc.3;uc011kxl.2;ENST00000415599;ENST00000434271;ENST00000540571;E…	RefSeq;RefSeq;RefSeq;RefSeq;RefSeq;ENSEMBL;ENSEMBL;ENSEMBL;ENSEMBL;ENSEMBL;ENSEMBL;ENSEMBL;ENSEMBL;GenBank;GenBank;GenBank;GenBank;GenBankHTC;GenBank;Havanatranscript;UCSCGenes;UCSCGenes;UCSCGenes;UCSCGenes;UCSCGenes;UCSCGenes;UCSCGenes;UCSCGenes;UCSCGenes;ENSEMBL;ENSEMBL;ENSEMBL;ENSEMBL	0.00572625
151963	TC03002118.hg.1	TC03002118.hg.1	chr3	-	192514604	192635950	50	121346	192635950	MB21D2	MB21D2;MB21D2;MB21D2	MB21D2	NM_178496;ENST00000392452;BC013123;BC036194;BC045582;OTTHUMT00000341543;uc011bsp.2	RefSeq;ENSEMBL;GenBank;GenBank;GenBank;Havanatranscript;UCSCGenes	0.0402285
152485	TC04001615.hg.1	TC04001615.hg.1	chr4	-	146678779	146859787	300	181008	146859787	ZNF827	ZNF827;ZNF827;ZNF827;ZNF827;ZNF827;ZNF827;ZNF827;ZNF827;ZNF827;ZNF827;ZNF827;ZNF827;ZNF827;ZNF827;ZNF827;ZNF827;ZNF827;ZNF827	ZNF827	NM_178835;ENST00000379448;ENST00000508784;ENST00000511534;ENST00000513320;AB074279;AF450485;BC117407;BC143577;OTTHUMT00000364654;OTTHUMT00000364655;OTTHUMT00000364656;OTTHUMT00000364921;OTTHUMT00000364922;OTTHUMT00000366933;OTTHUMT00000366934;OTTHUMT00000366935;OTTHUMT00000366936;OTTHUMT00000366937;uc003ikl.3;uc003ikm.3;uc003ikn.3;uc010iox.3;ENST00000281318;ENST00000440280	RefSeq;ENSEMBL;ENSEMBL;ENSEMBL;ENSEMBL;GenBank;GenBank;GenBank;GenBank;Havanatranscript;Havanatranscript;Havanatranscript;Havanatranscript;Havanatranscript;Havanatranscript;Havanatranscript;Havanatranscript;Havanatranscript;Havanatranscript;UCSCGenes;UCSCGenes;UCSCGenes;UCSCGenes;ENSEMBL;ENSEMBL	-0.0519809
1525	TC21000049.hg.1	TC21000049.hg.1	chr21	+	18884700	18965897	160	81197	18884700	CXADR	CXADR;CXADR;CXADR;CXADR;CXADR;CXADR;CXADR;CXADR;CXADR;CXADR;CXADR;CXADR;CXADR;CXADR;CXADR;CXADR;CXADR;CXADR;CXADR;CXADR;CXADR;CXADR	CXADR	NM_001207063;NM_001207064;NM_001207065;NM_001207066;NM_001338;ENST00000284878;ENST00000356275;ENST00000400165;ENST00000400166;ENST00000400169;BC003684;BC010536;GU474812;OTTHUMT00000158209;OTTHUMT00000158210;OTTHUMT00000158211;OTTHUMT00000158212;OTTHUMT00000340163;uc002ykh.2;uc002yki.3;uc002ykj.2;uc010gld.2;uc010gle.2;uc021whp.1;ENST00000306618	RefSeq;RefSeq;RefSeq;RefSeq;RefSeq;ENSEMBL;ENSEMBL;ENSEMBL;ENSEMBL;ENSEMBL;GenBank;GenBank;GenBank;Havanatranscript;Havanatranscript;Havanatranscript;Havanatranscript;Havanatranscript;UCSCGenes;UCSCGenes;UCSCGenes;UCSCGenes;UCSCGenes;UCSCGenes;ENSEMBL	0.00305283
152519	TC04000275.hg.1	TC04000275.hg.1	chr4	+	47916159	48042188	210	126029	47916159	NIPAL1	NIPAL1;NIPAL1;NIPAL1;NIPAL1;NIPAL1;NIPAL1;NIPAL1;BC041434;NIPAL1;NIPAL1	NIPAL1;BC041434	NM_207330;ENST00000295461;ENST00000508180;BC067881;OTTHUMT00000250491;OTTHUMT00000366065;OTTHUMT00000366067;OTTHUMT00000371445;OTTHUMT00000372072;OTTHUMT00000372073;uc003gxw.3;BC041434;BC041434;uc003gxr.1	RefSeq;ENSEMBL;ENSEMBL;GenBank;Havanatranscript;Havanatranscript;Havanatranscript;Havanatranscript;Havanatranscript;Havanatranscript;UCSCGenes;NONCODE;GenBank;UCSCGenes	0.00104464
153770	TC05001898.hg.1	TC05001898.hg.1	chr5	-	145463876	145483946	70	20070	145483946	PLAC8L1	PLAC8L1;PLAC8L1;PLAC8L1;PLAC8L1;PLAC8L1;PLAC8L1	PLAC8L1	NM_001029869;ENST00000311450;BC130586;BC130588;BC144387;BC144389;OTTHUMT00000373290;OTTHUMT00000373291;uc003lnv.3;uc011dbp.2;uc021yfd.1	RefSeq;ENSEMBL;GenBank;GenBank;GenBank;GenBank;Havanatranscript;Havanatranscript;UCSCGenes;UCSCGenes;UCSCGenes	-0.00805617
1571	TC10000956.hg.1	TC10000956.hg.1	chr10	+	135333910	135374724	195	40814	135333910	CYP2E1	CYP2E1;CYP2E1;CYP2E1;CYP2E1;CYP2E1;CYP2E1;CYP2E1;CYP2E1;CYP2E1;CYP2E1;CYP2E1;CYP2E1;CYP2E1;CYP2E1	CYP2E1	NM_000773;ENST00000252945;ENST00000463117;ENST00000480558;AJ853939;AJ853940;AJ877238;BC067433;BC067435;OTTHUMT00000051161;OTTHUMT00000051162;OTTHUMT00000051163;OTTHUMT00000051164;OTTHUMT00000051165;uc001lnj.1;uc001lnk.1;uc009ybl.1;uc009ybm.1;AB209700;uc001lnl.1	RefSeq;ENSEMBL;ENSEMBL;ENSEMBL;GenBank;GenBank;GenBank;GenBank;GenBank;Havanatranscript;Havanatranscript;Havanatranscript;Havanatranscript;Havanatranscript;UCSCGenes;UCSCGenes;UCSCGenes;UCSCGenes;GenBank;UCSCGenes	0.0147734
157657	TC08001444.hg.1	TC08001444.hg.1	chr8	-	96257141	96281462	79	24321	96281462	C8orf37	C8orf37;C8orf37;C8orf37	C8orf37	NM_177965;ENST00000286688;OTTHUMT00000379672;uc003yho.2	RefSeq;ENSEMBL;Havanatranscript;UCSCGenes	-0.000294951
1589	TC06000393.hg.1	TC06000393.hg.1	chr6	+	32006042	32009447	231	3405	32006042	CYP21A2	CYP21A2;CYP21A2;CYP21A2;CYP21A2;CYP21A2;CYP21A2;CYP21A2;CYP21A2;CYP21A2;CYP21A2;CYP21A2;CYP21A2;CYP21A2;CYP21A2;CYP21A2;CYP21A2;CYP21A2;CYP21A2;CYP21A2;CYP21A2;CYP21A2	CYP21A2	NM_000500;NM_001128590;ENST00000418967;ENST00000435122;BC125181;BC125182;OTTHUMT00000076091;OTTHUMT00000076092;OTTHUMT00000076093;OTTHUMT00000268768;OTTHUMT00000268769;OTTHUMT00000268770;OTTHUMT00000268771;OTTHUMT00000268772;OTTHUMT00000268773;OTTHUMT00000268774;OTTHUMT00000356948;OTTHUMT00000356949;OTTHUMT00000356950;OTTHUMT00000356951;OTTHUMT00000356952;uc003nze.2;uc003nzf.2	RefSeq;RefSeq;ENSEMBL;ENSEMBL;GenBank;GenBank;Havanatranscript;Havanatranscript;Havanatranscript;Havanatranscript;Havanatranscript;Havanatranscript;Havanatranscript;Havanatranscript;Havanatranscript;Havanatranscript;Havanatranscript;Havanatranscript;Havanatranscript;Havanatranscript;Havanatranscript;UCSCGenes;UCSCGenes	0.0262423
159296	TC10000712.hg.1	TC10000712.hg.1	chr10	+	101292690	101296281	40	3591	101292690	NKX2-3	NKX2-3;NKX2-3;NKX2-3	NKX2-3	NM_145285;ENST00000344586;BC025788;OTTHUMT00000049808;uc009xwj.3	RefSeq;ENSEMBL;GenBank;Havanatranscript;UCSCGenes	0.00205974
1601	TC05002969.hg.1	TC05002969.hg.1	chr5	-	39383148	39393457	70	10309	39393457	DAB2	NA	NA	L16886	NONCODE	-0.00537311
1611	TC05001164.hg.1	TC05001164.hg.1	chr5	-	10679342	10761387	162	82045	10761387	DAP	DAP;DAP;DAP;DAP;DAP;DAP;DAP;DAP;DAP;DAP;DAP;DAP	DAP	NM_004394;ENST00000230895;ENST00000432074;ENST00000510546;AK298670;BC002726;OTTHUMT00000253687;OTTHUMT00000367388;OTTHUMT00000367389;OTTHUMT00000367390;OTTHUMT00000367392;OTTHUMT00000367393;uc003jez.4;uc011cmw.2	RefSeq;ENSEMBL;ENSEMBL;ENSEMBL;GenBank;GenBank;Havanatranscript;Havanatranscript;Havanatranscript;Havanatranscript;Havanatranscript;Havanatranscript;UCSCGenes;UCSCGenes	0.0176919
161436	TC14001424.hg.1	TC14001424.hg.1	chr14	-	89078775	89259096	520	180321	89259096	EML5	EML5;EML5;EML5;EML5;EML5;EML5;EML5;EML5;EML5;EML5;EML5	EML5	NM_183387;ENST00000380664;ENST00000553320;ENST00000554922;AK127024;AK128086;BC150639;CR933726;uc001xxe.3;uc001xxf.3;uc001xxh.1;uc021ryf.1;ENST00000352093;AK122823;uc001xxd.3;uc021ryg.1	RefSeq;ENSEMBL;ENSEMBL;ENSEMBL;GenBank;GenBank;GenBank;GenBankHTC;UCSCGenes;UCSCGenes;UCSCGenes;UCSCGenes;ENSEMBL;GenBank;UCSCGenes;UCSCGenes	0.0500683
162966	TC19001804.hg.1	TC19001804.hg.1	chr19	-	53268747	53290034	40	21287	53290034	ZNF600	ZNF600;ZNF600;ZNF600;ZNF600	ZNF600	NM_198457;ENST00000338230;uc002qab.4;uc021uyz.1	RefSeq;ENSEMBL;UCSCGenes;UCSCGenes	0.0127723
162998	TC19000156.hg.1	TC19000156.hg.1	chr19	+	9296270	9299493	30	3223	9296270	OR7D2	OR7D2;OR7D2;OR7D2	OR7D2	NM_175883;ENST00000344248;uc002mkz.1	RefSeq;ENSEMBL;UCSCGenes	-0.000552944
166614	TC04002263.hg.1	TC04002263.hg.1	chr4	+	150999426	151178608	170	179182	150999426	DCLK2	NA	NA	NR_036614	NONCODE	0.00924221
1675	TC19000020.hg.1	TC19000020.hg.1	chr19	+	859661	863610	60	3949	859661	CFD	CFD;CFD;CFD	CFD	NM_001928;ENST00000327726;BC057807;uc002lqc.3	RefSeq;ENSEMBL;GenBank;UCSCGenes	0.00274268
168448	TC07000309.hg.1	TC07000309.hg.1	chr7	+	48964157	48967049	30	2892	48964157	CDC14C	CDC14C	CDC14C	NR_003595;NR_003595;uc010kyv.1	RefSeq;NONCODE;UCSCGenes	0.00199824
168474	TC07002984.hg.1	TC07002984.hg.1	chr7	-	64310071	64314178	30	4107	64314178	SEPHS1P1	NA	NA	NR_002789	NONCODE	-0.00523741
169200	TC08001405.hg.1	TC08001405.hg.1	chr8	-	91634223	91803860	150	169637	91803860	TMEM64	TMEM64;TMEM64;TMEM64;TMEM64;TMEM64;TMEM64;TMEM64;TMEM64;TMEM64;TMEM64;TMEM64;TMEM64;TMEM64;TMEM64;TMEM64	TMEM64	NM_001008495;NM_001146273;ENST00000418210;ENST00000458549;ENST00000519519;ENST00000523902;BC113828;OTTHUMT00000347825;OTTHUMT00000347826;OTTHUMT00000376592;OTTHUMT00000376720;OTTHUMT00000376721;OTTHUMT00000376722;uc003yen.2;uc003yeo.2;uc011lgf.1	RefSeq;RefSeq;ENSEMBL;ENSEMBL;ENSEMBL;ENSEMBL;GenBank;Havanatranscript;Havanatranscript;Havanatranscript;Havanatranscript;Havanatranscript;Havanatranscript;UCSCGenes;UCSCGenes;UCSCGenes	-0.0234876
169834	TC09001495.hg.1	TC09001495.hg.1	chr9	-	115759400	115774507	70	15107	115774507	ZNF883	ZNF883;ZNF883	ZNF883	NM_001101338;uc011lwy.2;ENST00000427548;OTTHUMT00000053704	RefSeq;UCSCGenes;ENSEMBL;Havanatranscript	0.00531662
171220	TC12002209.hg.1	TC12002209.hg.1	chr12	+	6993846	6994950	30	1104	6993846	DSTNP2	DSTNP2	DSTNP2	NR_033796	NONCODE	0.00130039
1803	TC02002478.hg.1	TC02002478.hg.1	chr2	-	162848751	162931052	410	82301	162931052	DPP4	DPP4;DPP4;DPP4;DPP4;DPP4;DPP4;DPP4;DPP4;DPP4;DPP4;DPP4;DPP4;DPP4;DPP4;DPP4;DPP4	DPP4	NM_001935;ENST00000360534;ENST00000491591;AK314798;AY429532;AY429533;BC065265;OTTHUMT00000255079;OTTHUMT00000332715;OTTHUMT00000332716;OTTHUMT00000332717;OTTHUMT00000332718;OTTHUMT00000332719;OTTHUMT00000332720;OTTHUMT00000332721;OTTHUMT00000332723;OTTHUMT00000332724;uc002ubz.3;uc002uca.1;uc002ucb.1;uc010fpb.3	RefSeq;ENSEMBL;ENSEMBL;GenBankHTC;GenBank;GenBank;GenBank;Havanatranscript;Havanatranscript;Havanatranscript;Havanatranscript;Havanatranscript;Havanatranscript;Havanatranscript;Havanatranscript;Havanatranscript;Havanatranscript;UCSCGenes;UCSCGenes;UCSCGenes;UCSCGenes	0.0306899
1824	TC18000436.hg.1	TC18000436.hg.1	chr18	-	28645940	28682388	240	36448	28682388	DSC2	DSC2;DSC2;DSC2;DSC2;DSC2;DSC2;DSC2;DSC2;DSC2	DSC2	NM_004949;NM_024422;ENST00000251081;ENST00000280904;AK297029;BC063291;OTTHUMT00000254943;OTTHUMT00000254944;uc002kwk.4;uc002kwl.4;uc010xbo.1;ENST00000399347;ENST00000438199	RefSeq;RefSeq;ENSEMBL;ENSEMBL;GenBank;GenBank;Havanatranscript;Havanatranscript;UCSCGenes;UCSCGenes;UCSCGenes;ENSEMBL;ENSEMBL	-0.100479
192217	TC01000497.hg.1	TC01000497.hg.1	chr1	+	39980538	39982339	30	1801	39980538	OXCT2P1	NA	NA	BC072388	GenBank	-0.00788612
193629	TC21000096.hg.1	TC21000096.hg.1	chr21	+	30565801	30660526	70	94725	30565801	LINC00189	LINC00189;LINC00189;LINC00189;LINC00189;LINC00189;LINC00189;LINC00189	LINC00189	NR_027072;ENST00000420364;BC065252;OTTHUMT00000171969;OTTHUMT00000171970;OTTHUMT00000171971;uc002ynh.3;uc002yni.3;uc002ynh.2;uc002yni.2	RefSeq;ENSEMBL;GenBank;Havanatranscript;Havanatranscript;Havanatranscript;UCSCGenes;UCSCGenes;NONCODE;NONCODE	-0.00625948
1942	TC01001288.hg.1	TC01001288.hg.1	chr1	+	155099936	155107386	150	7450	155099936	EFNA1	EFNA1;EFNA1;EFNA1;EFNA1;EFNA1;EFNA1;EFNA1;EFNA1;EFNA1;EFNA1;AK308965;EFNA1;EFNA1	EFNA1;AK308965	NM_004428;NM_182685;ENST00000368406;ENST00000368407;ENST00000469878;AK308965;BC032698;BC095432;OTTHUMT00000085428;OTTHUMT00000085485;OTTHUMT00000085486;OTTHUMT00000085487;OTTHUMT00000085488;uc001fhh.3;uc001fhi.3;uc009wpd.1	RefSeq;RefSeq;ENSEMBL;ENSEMBL;ENSEMBL;GenBankHTC;GenBank;GenBank;Havanatranscript;Havanatranscript;Havanatranscript;Havanatranscript;Havanatranscript;UCSCGenes;UCSCGenes;UCSCGenes	-0.000350251
196472	TC12000768.hg.1	TC12000768.hg.1	chr12	+	100041528	100043892	30	2364	100041528	FAM71C	FAM71C;FAM71C;FAM71C	FAM71C	NM_153364;ENST00000324341;BC031221;uc001tgn.3	RefSeq;ENSEMBL;GenBank;UCSCGenes	-0.00264764
197003	TC15001534.hg.1	TC15001534.hg.1	chr15	-	62929371	62937490	60	8119	62937490	MGC15885	;;MGC15885;MGC15885	MGC15885	NR_026897;ENST00000558940;ENST00000560347;BC131619;uc002ala.3;uc010uib.1	RefSeq;ENSEMBL;ENSEMBL;GenBank;UCSCGenes;UCSCGenes	-0.00732065
197320	TC16001707.hg.1	TC16001707.hg.1	chr16	+	89284111	89295965	60	11854	89284111	ZNF778	NA	NA	NR_037705	NONCODE	-0.0083386
1990	TC12001508.hg.1	TC12001508.hg.1	chr12	-	51722227	51740463	92	18236	51740463	CELA1	CELA1;CELA1;CELA1	CELA1	NM_001971;ENST00000293636;BC069454;BC075091;uc001ryi.1	RefSeq;ENSEMBL;GenBank;GenBank;UCSCGenes	0.00206715
2019	TC02002248.hg.1	TC02002248.hg.1	chr2	-	119599747	119605759	40	6012	119605759	EN1	EN1;EN1;EN1;EN1	EN1	NM_001426;ENST00000295206;ENST00000546667;OTTHUMT00000254191;uc002tlm.3	RefSeq;ENSEMBL;ENSEMBL;Havanatranscript;UCSCGenes	-0.00654351
2026	TC12000099.hg.1	TC12000099.hg.1	chr12	+	7023491	7032861	190	9370	7023491	ENO2	ENO2;ENO2;ENO2;ENO2;ENO2;ENO2;ENO2;ENO2;ENO2;ENO2;ENO2;ENO2;ENO2	ENO2	NM_001975;ENST00000229277;ENST00000535275;ENST00000535366;ENST00000538763;ENST00000539713;ENST00000541477;ENST00000545045;AK124656;AK290525;AK295220;BC002745;uc001qru.1;uc001qrv.1;uc009zfi.1;uc010sfq.1;ENST00000544774	RefSeq;ENSEMBL;ENSEMBL;ENSEMBL;ENSEMBL;ENSEMBL;ENSEMBL;ENSEMBL;GenBank;GenBank;GenBank;GenBank;UCSCGenes;UCSCGenes;UCSCGenes;UCSCGenes;ENSEMBL	0.0563158
2029	TC01003207.hg.1	TC01003207.hg.1	chr1	-	150573327	150602098	241	28771	150602098	ENSA	ENSA;ENSA;ENSA;ENSA;ENSA;ENSA;ENSA;ENSA;ENSA;ENSA;ENSA;ENSA;ENSA;ENSA;ENSA;ENSA;ENSA;ENSA;ENSA;ENSA;ENSA;ENSA;ENSA;ENSA;ENSA;ENSA;ENSA;ENSA;ENSA;ENSA;ENSA;ENSA;ENSA;ENSA;ENSA;ENSA;ENSA;ENSA;ENSA;ENSA;ENSA;ENSA;ENSA;ENSA	ENSA	NM_004436;NM_207042;NM_207043;NM_207044;NM_207045;NM_207046;NM_207047;NM_207168;ENST00000271690;ENST00000339643;ENST00000354702;ENST00000356527;ENST00000361532;ENST00000361631;ENST00000362052;ENST00000369014;ENST00000369016;ENST00000503241;ENST00000503345;ENST00000513281;BC000436;BC068544;BC069208;CR749580;OTTHUMT00000084720;OTTHUMT00000084721;OTTHUMT00000087244;OTTHUMT00000087245;OTTHUMT00000087…	RefSeq;RefSeq;RefSeq;RefSeq;RefSeq;RefSeq;RefSeq;RefSeq;ENSEMBL;ENSEMBL;ENSEMBL;ENSEMBL;ENSEMBL;ENSEMBL;ENSEMBL;ENSEMBL;ENSEMBL;ENSEMBL;ENSEMBL;ENSEMBL;GenBank;GenBank;GenBank;GenBankHTC;Havanatranscript;Havanatranscript;Havanatranscript;Havanatranscript;Havanatranscript;Havanatranscript;Havanatranscript;Havanatranscript;Havanatranscript;Havanatranscript;Havanatranscript;Havanatranscript;Havanatr…	0.00628758
2037	TC06002106.hg.1	TC06002106.hg.1	chr6	-	131160487	131384462	380	223975	131384462	EPB41L2	EPB41L2;EPB41L2;EPB41L2;EPB41L2;EPB41L2;EPB41L2;EPB41L2;EPB41L2;EPB41L2;EPB41L2;EPB41L2;EPB41L2;EPB41L2;EPB41L2;EPB41L2;EPB41L2;EPB41L2;EPB41L2;EPB41L2;EPB41L2;EPB41L2;EPB41L2;EPB41L2;EPB41L2;EPB41L2;EPB41L2;EPB41L2;EPB41L2;EPB41L2;EPB41L2;EPB41L2;EPB41L2;EPB41L2;EPB41L2	EPB41L2	NM_001135554;NM_001135555;NM_001199388;NM_001199389;NM_001252660;NM_001431;ENST00000337057;ENST00000368128;ENST00000392427;ENST00000445890;ENST00000524581;ENST00000525193;ENST00000525271;ENST00000527411;ENST00000527659;ENST00000528282;ENST00000529208;ENST00000530148;ENST00000530481;ENST00000530757;ENST00000531410;AJ251209;AK127088;AL050384;AY512660;BC034718;OTTHUMT00000042204;OTTHUMT00000042205;O…	RefSeq;RefSeq;RefSeq;RefSeq;RefSeq;RefSeq;ENSEMBL;ENSEMBL;ENSEMBL;ENSEMBL;ENSEMBL;ENSEMBL;ENSEMBL;ENSEMBL;ENSEMBL;ENSEMBL;ENSEMBL;ENSEMBL;ENSEMBL;ENSEMBL;ENSEMBL;GenBank;GenBank;GenBank;GenBank;GenBank;Havanatranscript;Havanatranscript;Havanatranscript;UCSCGenes;UCSCGenes;UCSCGenes;UCSCGenes;UCSCGenes;UCSCGenes;UCSCGenes;UCSCGenes;UCSCGenes;UCSCGenes;ENSEMBL;ENSEMBL	0.00298065
203859	TC11000261.hg.1	TC11000261.hg.1	chr11	+	22214722	22304913	260	90191	22214722	ANO5	ANO5;ANO5;ANO5;ANO5;ANO5;ANO5	ANO5	NM_001142649;NM_213599;ENST00000324559;ENST00000532043;uc001mqi.2;uc001mqj.2	RefSeq;RefSeq;ENSEMBL;ENSEMBL;UCSCGenes;UCSCGenes	0.0109
2043	TC02002808.hg.1	TC02002808.hg.1	chr2	-	222282747	222438922	375	156175	222438922	EPHA4	EPHA4;EPHA4;EPHA4;EPHA4;EPHA4;EPHA4;EPHA4;EPHA4;EPHA4;EPHA4;EPHA4;EPHA4;EPHA4;EPHA4;EPHA4;EPHA4;EPHA4;EPHA4;EPHA4;EPHA4;EPHA4	EPHA4	NM_004438;ENST00000281821;ENST00000409854;ENST00000409938;ENST00000469354;AK300772;BC026327;BC105000;OTTHUMT00000256836;OTTHUMT00000332695;OTTHUMT00000332696;OTTHUMT00000332697;OTTHUMT00000332698;OTTHUMT00000332699;OTTHUMT00000332700;OTTHUMT00000332701;OTTHUMT00000332702;OTTHUMT00000333850;OTTHUMT00000333851;OTTHUMT00000335499;OTTHUMT00000335500;uc002vmq.3;uc002vmr.2;uc010zlm.1	RefSeq;ENSEMBL;ENSEMBL;ENSEMBL;ENSEMBL;GenBank;GenBank;GenBank;Havanatranscript;Havanatranscript;Havanatranscript;Havanatranscript;Havanatranscript;Havanatranscript;Havanatranscript;Havanatranscript;Havanatranscript;Havanatranscript;Havanatranscript;Havanatranscript;Havanatranscript;UCSCGenes;UCSCGenes;UCSCGenes	-0.00620442
2052	TC01001856.hg.1	TC01001856.hg.1	chr1	+	225997794	226033262	170	35468	225997794	EPHX1	EPHX1;EPHX1;EPHX1;EPHX1;EPHX1;EPHX1;EPHX1;EPHX1;EPHX1;EPHX1;EPHX1	EPHX1	NM_000120;NM_001136018;ENST00000272167;ENST00000366837;ENST00000467015;BC003567;BC095430;OTTHUMT00000092064;OTTHUMT00000092065;OTTHUMT00000092066;OTTHUMT00000092183;uc001hpk.3;uc001hpl.3	RefSeq;RefSeq;ENSEMBL;ENSEMBL;ENSEMBL;GenBank;GenBank;Havanatranscript;Havanatranscript;Havanatranscript;Havanatranscript;UCSCGenes;UCSCGenes	0.0152971
205251	TC02004493.hg.1	TC02004493.hg.1	chr2	-	110326395	110337806	80	11411	110337806	LINC00116	LINC00116	LINC00116	OTTHUMT00000253918	NONCODE	0.00885039
2055	TC08000008.hg.1	TC08000008.hg.1	chr8	+	1703944	1734738	176	30794	1703944	CLN8	CLN8;CLN8;CLN8;CLN8;CLN8;CLN8;CLN8;CLN8;CLN8;CLN8	CLN8	NM_018941;ENST00000331222;ENST00000523237;BC007725;BC136825;OTTHUMT00000206715;OTTHUMT00000374579;OTTHUMT00000374580;OTTHUMT00000374581;OTTHUMT00000374583;OTTHUMT00000374585;OTTHUMT00000375053;uc003wpo.4	RefSeq;ENSEMBL;ENSEMBL;GenBank;GenBank;Havanatranscript;Havanatranscript;Havanatranscript;Havanatranscript;Havanatranscript;Havanatranscript;Havanatranscript;UCSCGenes	-0.00792968
2166	TC01000585.hg.1	TC01000585.hg.1	chr1	+	46859937	46879520	238	19583	46859937	FAAH	FAAH;FAAH;FAAH;FAAH;FAAH;FAAH;FAAH;FAAH;FAAH;FAAH	FAAH	NM_001441;ENST00000243167;ENST00000493735;AL050372;BC093632;BC110404;OTTHUMT00000021443;OTTHUMT00000021444;OTTHUMT00000021445;OTTHUMT00000021446;OTTHUMT00000021447;OTTHUMT00000021448;uc001cpu.2;uc001cpv.2;ENST00000396325	RefSeq;ENSEMBL;ENSEMBL;GenBank;GenBank;GenBank;Havanatranscript;Havanatranscript;Havanatranscript;Havanatranscript;Havanatranscript;Havanatranscript;UCSCGenes;UCSCGenes;ENSEMBL	0.00676996
219854	TC11002416.hg.1	TC11002416.hg.1	chr11	-	124966398	124981604	219	15206	124981604	TMEM218	TMEM218;TMEM218;TMEM218;TMEM218;TMEM218;TMEM218;TMEM218;TMEM218;TMEM218;TMEM218;TMEM218;TMEM218;TMEM218	TMEM218	NM_001080546;ENST00000279968;ENST00000526175;ENST00000527271;ENST00000527766;ENST00000528724;ENST00000529583;ENST00000529609;ENST00000531262;ENST00000531909;ENST00000532156;ENST00000532407;BC132716;BC132718;BC144270;BC144276;BC144277;ENST00000455225;uc001qbs.3;uc001qbt.3;uc010saw.2;uc010sax.2;uc010say.2	RefSeq;ENSEMBL;ENSEMBL;ENSEMBL;ENSEMBL;ENSEMBL;ENSEMBL;ENSEMBL;ENSEMBL;ENSEMBL;ENSEMBL;ENSEMBL;GenBank;GenBank;GenBank;GenBank;GenBank;ENSEMBL;UCSCGenes;UCSCGenes;UCSCGenes;UCSCGenes;UCSCGenes	-0.00692246
220930	TC10002544.hg.1	TC10002544.hg.1	chr10	-	31596658	31608810	140	12152	31608810	ZEB1-AS1	ZEB1-AS1;ZEB1-AS1;ZEB1-AS1;ZEB1-AS1;ZEB1-AS1	ZEB1-AS1	BC042008;NR_024284;ENST00000423714;ENST00000424191;ENST00000441257;ENST00000450834;linc_luo_661	NONCODE;NONCODE;NONCODE;NONCODE;NONCODE;NONCODE;NONCODE	-0.003125
2215	TC01006308.hg.1	TC01006308.hg.1	chr1	-	161592986	161601753	110	8767	161601753	FCGR3B	FCGR3B;FCGR3B;FCGR3B;FCGR3B;FCGR3B;FCGR3B;FCGR3B;FCGR3B;FCGR3B	FCGR3B	NM_000570;NM_001244753;ENST00000294800;ENST00000367964;ENST00000531221;BC128562;OTTHUMT00000157321;OTTHUMT00000157322;uc009wul.3;uc021pdo.1	RefSeq;RefSeq;ENSEMBL;ENSEMBL;ENSEMBL;GenBank;Havanatranscript;Havanatranscript;UCSCGenes;UCSCGenes	-0.00272696
222962	TC07000050.hg.1	TC07000050.hg.1	chr7	+	5314000	5343704	199	29704	5314000	SLC29A4	SLC29A4;SLC29A4;SLC29A4;SLC29A4;SLC29A4;SLC29A4;SLC29A4;SLC29A4;SLC29A4;SLC29A4;SLC29A4;SLC29A4;SLC29A4;SLC29A4;SLC29A4;SLC29A4	SLC29A4	NM_001040661;NM_153247;ENST00000297195;ENST00000396872;ENST00000406453;ENST00000439491;AK296278;BC025325;BC047592;OTTHUMT00000060118;OTTHUMT00000323998;OTTHUMT00000323999;OTTHUMT00000324000;OTTHUMT00000324001;OTTHUMT00000324010;uc003soc.3;uc003sod.3;uc003soe.3;uc011jwg.1	RefSeq;RefSeq;ENSEMBL;ENSEMBL;ENSEMBL;ENSEMBL;GenBank;GenBank;GenBank;Havanatranscript;Havanatranscript;Havanatranscript;Havanatranscript;Havanatranscript;Havanatranscript;UCSCGenes;UCSCGenes;UCSCGenes;UCSCGenes	-0.0024224
2260	TC08001147.hg.1	TC08001147.hg.1	chr8	-	38268656	38326352	560	57696	38326352	FGFR1	FGFR1;FGFR1;FGFR1;FGFR1;FGFR1;FGFR1;FGFR1;FGFR1;FGFR1;FGFR1;FGFR1;FGFR1;FGFR1;FGFR1;FGFR1;FGFR1;FGFR1;FGFR1;FGFR1;FGFR1;FGFR1;FGFR1;FGFR1;FGFR1;FGFR1;FGFR1;FGFR1;FGFR1;FGFR1;FGFR1;FGFR1;FGFR1;FGFR1;FGFR1;FGFR1;FGFR1;FGFR1;FGFR1;FGFR1;FGFR1;FGFR1;FGFR1;FGFR1;FGFR1;FGFR1;FGFR1;FGFR1;FGFR1;FGFR1;FGFR1;FGFR1;FGFR1;FGFR1;FGFR1;FGFR1;FGFR1;FGFR1;FGFR1;FGFR1	FGFR1	NM_001174063;NM_001174064;NM_001174065;NM_001174066;NM_001174067;NM_015850;NM_023105;NM_023106;NM_023110;ENST00000326324;ENST00000335922;ENST00000341462;ENST00000356207;ENST00000397091;ENST00000397103;ENST00000397108;ENST00000397113;ENST00000425967;ENST00000447712;ENST00000496629;ENST00000532791;BC015035;BC018128;BC091494;EU826596;EU826597;FJ809916;M34187;M34188;M63888;M63889;OTTHUMT00000304010;O…	RefSeq;RefSeq;RefSeq;RefSeq;RefSeq;RefSeq;RefSeq;RefSeq;RefSeq;ENSEMBL;ENSEMBL;ENSEMBL;ENSEMBL;ENSEMBL;ENSEMBL;ENSEMBL;ENSEMBL;ENSEMBL;ENSEMBL;ENSEMBL;ENSEMBL;GenBank;GenBank;GenBank;GenBank;GenBank;GenBank;GenBank;GenBank;GenBank;GenBank;Havanatranscript;Havanatranscript;Havanatranscript;Havanatranscript;Havanatranscript;Havanatranscript;Havanatranscript;Havanatranscript;Havanatranscript;Havanat…	-0.0144183
22807	TC02002740.hg.1	TC02002740.hg.1	chr2	-	213864411	214017151	286	152740	214017151	IKZF2	IKZF2;IKZF2;IKZF2;IKZF2;IKZF2;IKZF2;IKZF2;IKZF2;IKZF2;IKZF2;IKZF2;IKZF2;IKZF2;IKZF2;IKZF2;IKZF2;IKZF2;IKZF2;IKZF2;IKZF2;IKZF2;IKZF2;IKZF2;IKZF2;IKZF2;IKZF2;IKZF2;IKZF2;IKZF2;IKZF2;IKZF2;IKZF2;IKZF2;IKZF2	IKZF2	NM_001079526;NM_016260;ENST00000342002;ENST00000374319;ENST00000434687;ENST00000442445;ENST00000451136;ENST00000457361;AY008294;AY587062;AY587065;AY587066;AY587067;AY587068;AY587070;AY587071;AY587073;BC028936;OTTHUMT00000256593;OTTHUMT00000256594;OTTHUMT00000336998;OTTHUMT00000336999;OTTHUMT00000337000;OTTHUMT00000337001;OTTHUMT00000337003;OTTHUMT00000337004;OTTHUMT00000337006;OTTHUMT00000337007;…	RefSeq;RefSeq;ENSEMBL;ENSEMBL;ENSEMBL;ENSEMBL;ENSEMBL;ENSEMBL;GenBank;GenBank;GenBank;GenBank;GenBank;GenBank;GenBank;GenBank;GenBank;GenBank;Havanatranscript;Havanatranscript;Havanatranscript;Havanatranscript;Havanatranscript;Havanatranscript;Havanatranscript;Havanatranscript;Havanatranscript;Havanatranscript;Havanatranscript;Havanatranscript;UCSCGenes;UCSCGenes;UCSCGenes;UCSCGenes;UCSCGenes;UCS…	-0.0454851
22854	TC01004589.hg.1	TC01004589.hg.1	chr1	+	107937921	108023375	46	85454	107937921	NTNG1	NA	NA	AY764262;AY764263;AY764266;AY764267;AY781194	NONCODE;NONCODE;NONCODE;NONCODE;NONCODE	-0.00718282
2289	TC06004150.hg.1	TC06004150.hg.1	chr6	-	35541362	35696397	201	155035	35696397	FKBP5	FKBP5;FKBP5;FKBP5;FKBP5;FKBP5;FKBP5;FKBP5;FKBP5;FKBP5;FKBP5;FKBP5;FKBP5;FKBP5;FKBP5;FKBP5	FKBP5	NM_001145775;NM_001145776;NM_001145777;NM_004117;ENST00000357266;ENST00000536438;ENST00000539068;ENST00000542713;AK302704;BC042605;BC111050;OTTHUMT00000040309;uc003okx.2;uc003oky.2;uc003okz.2;uc011dte.1;uc011dtf.1;ENST00000337746;ENST00000373875;ENST00000540787;ENST00000543400	RefSeq;RefSeq;RefSeq;RefSeq;ENSEMBL;ENSEMBL;ENSEMBL;ENSEMBL;GenBank;GenBank;GenBank;Havanatranscript;UCSCGenes;UCSCGenes;UCSCGenes;UCSCGenes;UCSCGenes;ENSEMBL;ENSEMBL;ENSEMBL;ENSEMBL	0.00686793
22927	TC09000480.hg.1	TC09000480.hg.1	chr9	+	99212414	99253618	110	41204	99212414	HABP4	HABP4;HABP4;HABP4;HABP4;HABP4;HABP4;HABP4;HABP4;HABP4	HABP4	NM_014282;ENST00000375249;ENST00000375251;ENST00000466976;BC018788;OTTHUMT00000053269;OTTHUMT00000053270;OTTHUMT00000053271;uc010msg.3;uc010msh.3	RefSeq;ENSEMBL;ENSEMBL;ENSEMBL;GenBank;Havanatranscript;Havanatranscript;Havanatranscript;UCSCGenes;UCSCGenes	0.000132461
23086	TC11002269.hg.1	TC11002269.hg.1	chr11	-	108376158	108464465	139	88307	108464465	EXPH5	EXPH5;EXPH5;EXPH5;EXPH5;EXPH5;EXPH5;EXPH5;EXPH5;EXPH5	EXPH5	NM_015065;ENST00000265843;ENST00000524840;ENST00000525344;AK303993;AK304212;BC113119;BC117701;uc001pkk.3;uc010rvy.2;uc010rvz.2;ENST00000428840;ENST00000439956;ENST00000443411	RefSeq;ENSEMBL;ENSEMBL;ENSEMBL;GenBank;GenBank;GenBank;GenBank;UCSCGenes;UCSCGenes;UCSCGenes;ENSEMBL;ENSEMBL;ENSEMBL	0.0116484
23111	TC13000566.hg.1	TC13000566.hg.1	chr13	-	36875775	36944317	315	68542	36944317	SPG20	SPG20;SPG20;SPG20;SPG20;SPG20;SPG20;SPG20;SPG20;SPG20;SPG20;SPG20;SPG20;SPG20;SPG20;SPG20;SPG20;SPG20;SPG20;SPG20;SPG20;SPG20;SPG20;SPG20	SPG20	NM_001142294;NM_001142295;NM_001142296;NM_015087;ENST00000355182;ENST00000438666;ENST00000451493;ENST00000494062;AK001949;AK302119;BC047083;OTTHUMT00000044494;OTTHUMT00000044495;OTTHUMT00000044497;OTTHUMT00000044498;OTTHUMT00000044499;OTTHUMT00000044500;OTTHUMT00000044501;OTTHUMT00000044502;OTTHUMT00000044503;uc001uvm.3;uc001uvn.3;uc001uvo.3;uc001uvp.2;uc001uvq.3;uc010ten.2;ENST00000423217;OTTHUM…	RefSeq;RefSeq;RefSeq;RefSeq;ENSEMBL;ENSEMBL;ENSEMBL;ENSEMBL;GenBank;GenBank;GenBank;Havanatranscript;Havanatranscript;Havanatranscript;Havanatranscript;Havanatranscript;Havanatranscript;Havanatranscript;Havanatranscript;Havanatranscript;UCSCGenes;UCSCGenes;UCSCGenes;UCSCGenes;UCSCGenes;UCSCGenes;ENSEMBL;Havanatranscript;Havanatranscript	0.00114322
23138	TC05001031.hg.1	TC05001031.hg.1	chr5	+	177540444	177553107	90	12663	177540444	N4BP3	N4BP3;N4BP3;AK127224;N4BP3	N4BP3;AK127224	NM_015111;ENST00000274605;AK127224;BC053323;uc003mik.1;OTTHUMT00000373552;uc003mil.1	RefSeq;ENSEMBL;GenBank;GenBank;UCSCGenes;Havanatranscript;UCSCGenes	0.00981941
23178	TC02002947.hg.1	TC02002947.hg.1	chr2	-	242045514	242089679	446	44165	242089679	PASK	PASK;PASK;PASK;PASK;PASK;PASK;PASK;PASK;PASK;PASK;PASK;PASK;PASK;PASK;PASK;PASK;PASK;PASK;PASK;PASK;PASK;PASK;PASK;PASK;PASK;PASK;PASK;PASK;PASK;PASK;PASK;PASK;PASK;PASK	PASK	NM_001252119;NM_001252120;NM_001252122;NM_001252124;NM_015148;ENST00000234040;ENST00000358649;ENST00000403638;ENST00000405260;ENST00000475666;ENST00000544142;AK296945;AK302561;AL117400;BC050565;BC063585;OTTHUMT00000257246;OTTHUMT00000323752;OTTHUMT00000323753;OTTHUMT00000323754;OTTHUMT00000323755;OTTHUMT00000323756;OTTHUMT00000323757;OTTHUMT00000323758;OTTHUMT00000323760;OTTHUMT00000323761;OTTHUM…	RefSeq;RefSeq;RefSeq;RefSeq;RefSeq;ENSEMBL;ENSEMBL;ENSEMBL;ENSEMBL;ENSEMBL;ENSEMBL;GenBank;GenBank;GenBankHTC;GenBank;GenBank;Havanatranscript;Havanatranscript;Havanatranscript;Havanatranscript;Havanatranscript;Havanatranscript;Havanatranscript;Havanatranscript;Havanatranscript;Havanatranscript;Havanatranscript;Havanatranscript;Havanatranscript;Havanatranscript;UCSCGenes;UCSCGenes;UCSCGenes;UCSCG…	-0.00790855
23199	TC16000664.hg.1	TC16000664.hg.1	chr16	+	85645023	85709812	325	64789	85645023	GSE1	GSE1;GSE1;GSE1;GSE1;GSE1;GSE1;GSE1;GSE1;GSE1;GSE1;GSE1;GSE1;GSE1;GSE1;GSE1;GSE1;GSE1;GSE1;GSE1;GSE1	GSE1	NM_001134473;NM_014615;ENST00000253458;ENST00000393243;ENST00000405402;ENST00000471070;AK127344;AK308612;BC037556;D80004;OTTHUMT00000269102;OTTHUMT00000325527;OTTHUMT00000325528;OTTHUMT00000325529;OTTHUMT00000325530;OTTHUMT00000325531;OTTHUMT00000325532;OTTHUMT00000325533;OTTHUMT00000325534;OTTHUMT00000325535;OTTHUMT00000325536;uc002fiw.3;uc002fiz.3;uc010cho.3;uc002fix.3;uc002fiy.3	RefSeq;RefSeq;ENSEMBL;ENSEMBL;ENSEMBL;ENSEMBL;GenBank;GenBankHTC;GenBank;GenBank;Havanatranscript;Havanatranscript;Havanatranscript;Havanatranscript;Havanatranscript;Havanatranscript;Havanatranscript;Havanatranscript;Havanatranscript;Havanatranscript;Havanatranscript;UCSCGenes;UCSCGenes;UCSCGenes;UCSCGenes;UCSCGenes	-0.00708793
2322	TC13000515.hg.1	TC13000515.hg.1	chr13	-	28577411	28674729	300	97318	28674729	FLT3	FLT3;FLT3;FLT3;FLT3;FLT3;FLT3;FLT3;FLT3;FLT3;FLT3;FLT3	FLT3	NM_004119;ENST00000241453;ENST00000469894;BC036028;BC126350;BC144039;OTTHUMT00000044319;OTTHUMT00000354576;OTTHUMT00000354577;uc001urw.3;uc010aao.3;uc010tdn.2;ENST00000380982;ENST00000537084	RefSeq;ENSEMBL;ENSEMBL;GenBank;GenBank;GenBank;Havanatranscript;Havanatranscript;Havanatranscript;UCSCGenes;UCSCGenes;UCSCGenes;ENSEMBL;ENSEMBL	0.00888568
23234	TC10002965.hg.1	TC10002965.hg.1	chr10	-	74998540	75003156	30	4616	75003156	DNAJC9	DNAJC9;DNAJC9	DNAJC9	ENST00000453189;OTTHUMT00000048623	ENSEMBL;Havanatranscript	0.00363327
23236	TC20000072.hg.1	TC20000072.hg.1	chr20	+	8095100	8949003	497	853903	8095100	PLCB1	PLCB1;PLCB1;PLCB1;PLCB1;PLCB1;PLCB1;PLCB1;PLCB1;PLCB1;PLCB1;PLCB1;PLCB1;PLCB1;PLCB1;PLCB1;PLCB1;PLCB1;PLCB1	PLCB1	NM_015192;NM_182734;ENST00000338037;ENST00000378637;ENST00000378641;ENST00000494924;AK023689;AK127693;AK299195;AK310597;BC069420;BC117231;OTTHUMT00000077936;OTTHUMT00000077937;OTTHUMT00000077938;OTTHUMT00000077939;OTTHUMT00000077940;OTTHUMT00000077941;OTTHUMT00000077942;OTTHUMT00000077943;OTTHUMT00000077944;uc002wnc.1;uc002wnd.1;uc010zrb.1;ENST00000338061;ENST00000441163;ENST00000535719;uc002wmz.…	RefSeq;RefSeq;ENSEMBL;ENSEMBL;ENSEMBL;ENSEMBL;GenBank;GenBank;GenBank;GenBankHTC;GenBank;GenBank;Havanatranscript;Havanatranscript;Havanatranscript;Havanatranscript;Havanatranscript;Havanatranscript;Havanatranscript;Havanatranscript;Havanatranscript;UCSCGenes;UCSCGenes;UCSCGenes;ENSEMBL;ENSEMBL;ENSEMBL;UCSCGenes;UCSCGenes;UCSCGenes;UCSCGenes	0.0180973
23263	TC13000415.hg.1	TC13000415.hg.1	chr13	+	113694662	113701655	30	6993	113694662	MCF2L	MCF2L;MCF2L	MCF2L	ENST00000480321;OTTHUMT00000277050	ENSEMBL;Havanatranscript	0.00182756
23286	TC05000918.hg.1	TC05000918.hg.1	chr5	+	167841077	167843527	30	2450	167841077	WWC1	NA	NA	OTTHUMT00000376172	Havanatranscript	0.00352074
23428	TC14000951.hg.1	TC14000951.hg.1	chr14	-	23594504	23652850	230	58346	23652850	SLC7A8	SLC7A8;SLC7A8;SLC7A8;SLC7A8;SLC7A8;SLC7A8;SLC7A8;SLC7A8;SLC7A8;SLC7A8;SLC7A8;SLC7A8	SLC7A8	NM_012244;NM_182728;ENST00000316902;ENST00000422941;ENST00000453702;ENST00000469263;ENST00000529705;ENST00000532568;AK094550;AK296702;AK300384;AL365342;BC036825;BC052250;OTTHUMT00000071718;OTTHUMT00000071719;OTTHUMT00000071720;uc001wiw.3;ENST00000206514;ENST00000334354;uc001wix.3;uc001wiy.3;uc001wiz.3;uc010akj.3;uc010tnk.2;uc010tnl.2	RefSeq;RefSeq;ENSEMBL;ENSEMBL;ENSEMBL;ENSEMBL;ENSEMBL;ENSEMBL;GenBank;GenBank;GenBank;GenBank;GenBank;GenBank;Havanatranscript;Havanatranscript;Havanatranscript;UCSCGenes;ENSEMBL;ENSEMBL;UCSCGenes;UCSCGenes;UCSCGenes;UCSCGenes;UCSCGenes;UCSCGenes	-0.0238972
246181	TC01005303.hg.1	TC01005303.hg.1	chr1	-	19592476	19600568	70	8092	19600568	AKR7L	NA	NA	NR_040288;NR_040289	NONCODE;NONCODE	0.00497915
2494	TC01001645.hg.1	TC01001645.hg.1	chr1	+	199996730	200146552	246	149822	199996730	NR5A2	NR5A2;NR5A2;NR5A2;NR5A2;NR5A2;NR5A2;NR5A2;NR5A2;NR5A2;NR5A2;NR5A2	NR5A2	NM_003822;NM_205860;ENST00000236914;ENST00000367362;ENST00000544748;AF124248;AF124248;AK304344;AK304365;BC118571;OTTHUMT00000086497;OTTHUMT00000086498;OTTHUMT00000086499;OTTHUMT00000086500;OTTHUMT00000086501;uc009wzh.3;ENST00000235480;ENST00000537715;ENST00000542116;uc001gvb.3;uc001gvc.3;uc009wzg.1;uc010pph.2	RefSeq;RefSeq;ENSEMBL;ENSEMBL;ENSEMBL;NONCODE;GenBank;GenBank;GenBank;GenBank;Havanatranscript;Havanatranscript;Havanatranscript;Havanatranscript;Havanatranscript;UCSCGenes;ENSEMBL;ENSEMBL;ENSEMBL;UCSCGenes;UCSCGenes;UCSCGenes;UCSCGenes	-0.00714861
253039	TC09000606.hg.1	TC09000606.hg.1	chr9	+	123605320	123616651	140	11331	123605320	PSMD5-AS1	PSMD5-AS1;PSMD5-AS1;PSMD5-AS1;PSMD5-AS1;PSMD5-AS1;PSMD5-AS1;PSMD5-AS1;PSMD5-AS1;LOC253039	PSMD5-AS1;LOC253039	NR_024408;NR_024408;OTTHUMT00000053822;ENST00000447891;DQ573668;DQ573668;ENST00000447891;OTTHUMT00000053820;OTTHUMT00000053821;OTTHUMT00000053823;OTTHUMT00000053824;uc004bkp.3;uc004bkq.3	RefSeq;NONCODE;Havanatranscript;ENSEMBL;NONCODE;GenBank;NONCODE;Havanatranscript;Havanatranscript;Havanatranscript;Havanatranscript;UCSCGenes;UCSCGenes	0.00879586
253461	TC03000760.hg.1	TC03000760.hg.1	chr3	+	141043055	141168634	409	125579	141043055	ZBTB38	ZBTB38;ZBTB38;ZBTB38;ZBTB38;ZBTB38;ZBTB38;ZBTB38;ZBTB38;ZBTB38;ZBTB38;ZBTB38;ZBTB38;ZBTB38;ZBTB38;ZBTB38;ZBTB38;ZBTB38;ZBTB38;ZBTB38;ZBTB38;ZBTB38;ZBTB38;ZBTB38;ZBTB38;ZBTB38;ZBTB38;ZBTB38;ZBTB38;ZBTB38;ZBTB38	ZBTB38	NM_001080412;ENST00000321464;ENST00000441582;ENST00000512327;ENST00000514251;AK302568;AK307452;OTTHUMT00000359329;OTTHUMT00000359330;OTTHUMT00000359331;OTTHUMT00000359332;OTTHUMT00000359333;OTTHUMT00000359334;OTTHUMT00000359335;OTTHUMT00000359401;OTTHUMT00000359402;OTTHUMT00000359403;OTTHUMT00000359404;OTTHUMT00000359405;OTTHUMT00000359406;OTTHUMT00000359407;OTTHUMT00000359409;OTTHUMT00000359410;…	RefSeq;ENSEMBL;ENSEMBL;ENSEMBL;ENSEMBL;GenBank;GenBankHTC;Havanatranscript;Havanatranscript;Havanatranscript;Havanatranscript;Havanatranscript;Havanatranscript;Havanatranscript;Havanatranscript;Havanatranscript;Havanatranscript;Havanatranscript;Havanatranscript;Havanatranscript;Havanatranscript;Havanatranscript;Havanatranscript;Havanatranscript;Havanatranscript;Havanatranscript;UCSCGenes;UCSCGene…	0.0275563
254783	TC12000476.hg.1	TC12000476.hg.1	chr12	+	55640982	55642086	30	1104	55640982	OR6C74	OR6C74;OR6C74;OR6C74	OR6C74	NM_001005490;ENST00000343870;BC140754;uc010spg.2	RefSeq;ENSEMBL;GenBank;UCSCGenes	3.17e-05
254863	TC17002886.hg.1	TC17002886.hg.1	chr17	-	7306293	7307456	46	1163	7307456	TMEM256	TMEM256;TMEM256;TMEM256	TMEM256	NM_152766;ENST00000302422;BC030270;OTTHUMT00000256404;uc002ggs.3	RefSeq;ENSEMBL;GenBank;Havanatranscript;UCSCGenes	-0.0326351
255626	TC06000158.hg.1	TC06000158.hg.1	chr6	+	25727137	25727573	30	436	25727137	HIST1H2BA	HIST1H2BA;HIST1H2BA;HIST1H2BA	HIST1H2BA	NM_170610;ENST00000274764;BC066238;OTTHUMT00000040066;uc003nfd.3	RefSeq;ENSEMBL;GenBank;Havanatranscript;UCSCGenes	0.00276503
255967	TC13000085.hg.1	TC13000085.hg.1	chr13	+	28712643	28869475	260	156832	28712643	PAN3	PAN3;PAN3;PAN3;PAN3;PAN3;PAN3;PAN3;PAN3;PAN3;PAN3;PAN3;PAN3;PAN3	PAN3	NM_175854;ENST00000380958;ENST00000399613;ENST00000483842;AK296435;BC128179;BC128180;OTTHUMT00000044317;OTTHUMT00000044318;OTTHUMT00000276106;OTTHUMT00000373279;uc001urx.3;uc001ury.3;uc001urz.3;uc010tdo.1;ENST00000282391	RefSeq;ENSEMBL;ENSEMBL;ENSEMBL;GenBank;GenBank;GenBank;Havanatranscript;Havanatranscript;Havanatranscript;Havanatranscript;UCSCGenes;UCSCGenes;UCSCGenes;UCSCGenes;ENSEMBL	-0.000250948
256148	TC11000416.hg.1	TC11000416.hg.1	chr11	+	48327775	48328704	30	929	48327775	OR4S1	OR4S1;OR4S1;OR4S1	OR4S1	NM_001004725;ENST00000319988;uc010rhu.2	RefSeq;ENSEMBL;UCSCGenes	0.000995095
25780	TC02000221.hg.1	TC02000221.hg.1	chr2	+	33656569	33789817	452	133248	33656569	RASGRP3	RASGRP3;RASGRP3;RASGRP3;RASGRP3;RASGRP3;RASGRP3;RASGRP3;RASGRP3;RASGRP3;RASGRP3;RASGRP3;RASGRP3;RASGRP3;RASGRP3;RASGRP3;RASGRP3;RASGRP3;RASGRP3;RASGRP3;RASGRP3;RASGRP3;RASGRP3;RASGRP3;RASGRP3;RASGRP3;RASGRP3;RASGRP3;RASGRP3;RASGRP3	RASGRP3	NM_001139488;NM_015376;NM_170672;ENST00000402538;ENST00000403687;ENST00000407811;ENST00000482731;AK125551;BC027849;OTTHUMT00000325338;OTTHUMT00000325339;OTTHUMT00000325341;OTTHUMT00000325342;OTTHUMT00000325462;OTTHUMT00000325463;OTTHUMT00000325464;OTTHUMT00000326416;OTTHUMT00000326417;OTTHUMT00000326418;OTTHUMT00000326419;OTTHUMT00000326420;OTTHUMT00000326421;OTTHUMT00000326422;OTTHUMT00000326424…	RefSeq;RefSeq;RefSeq;ENSEMBL;ENSEMBL;ENSEMBL;ENSEMBL;GenBank;GenBank;Havanatranscript;Havanatranscript;Havanatranscript;Havanatranscript;Havanatranscript;Havanatranscript;Havanatranscript;Havanatranscript;Havanatranscript;Havanatranscript;Havanatranscript;Havanatranscript;Havanatranscript;Havanatranscript;Havanatranscript;Havanatranscript;Havanatranscript;Havanatranscript;UCSCGenes;UCSCGenes;UCSC…	0.0117149
25843	TC02005005.hg.1	TC02005005.hg.1	chr2	+	198380295	198418423	181	38128	198380295	MOB4	MOB4;MOB4;MOB4;MOB4;MOB4;MOB4;MOB4;MOB4;MOB4;MOB4;MOB4;MOB4;MOB4;MOB4;MOB4;MOB4;MOB4;MOB4;MOB4;MOB4;MOB4;MOB4;MOB4;MOB4	MOB4	NM_001100819;NM_001204094;NM_015387;NM_199482;ENST00000233892;ENST00000323303;ENST00000409360;ENST00000409916;ENST00000448447;ENST00000497443;AK297294;AK307497;BC005237;OTTHUMT00000256110;OTTHUMT00000256111;OTTHUMT00000335481;OTTHUMT00000335482;OTTHUMT00000335483;OTTHUMT00000335484;OTTHUMT00000335485;OTTHUMT00000335486;uc002uum.4;uc002uun.4;uc010fsn.3;uc010fso.3;uc010zgz.2;uc021vun.1	RefSeq;RefSeq;RefSeq;RefSeq;ENSEMBL;ENSEMBL;ENSEMBL;ENSEMBL;ENSEMBL;ENSEMBL;GenBank;GenBankHTC;GenBank;Havanatranscript;Havanatranscript;Havanatranscript;Havanatranscript;Havanatranscript;Havanatranscript;Havanatranscript;Havanatranscript;UCSCGenes;UCSCGenes;UCSCGenes;UCSCGenes;UCSCGenes;UCSCGenes	-0.00143511
25945	TC03000561.hg.1	TC03000561.hg.1	chr3	+	110788918	110994410	288	205492	110788918	PVRL3	PVRL3;PVRL3;PVRL3;PVRL3;PVRL3;PVRL3;PVRL3;PVRL3;PVRL3;PVRL3;PVRL3;PVRL3;PVRL3;PVRL3;PVRL3;PVRL3;PVRL3;PVRL3;PVRL3;PVRL3	PVRL3	NM_001243286;NM_001243288;NM_015480;ENST00000319792;ENST00000485303;ENST00000488016;ENST00000493615;BC067808;OTTHUMT00000354044;OTTHUMT00000354045;OTTHUMT00000354046;OTTHUMT00000354047;OTTHUMT00000354048;OTTHUMT00000354049;OTTHUMT00000354050;OTTHUMT00000354051;OTTHUMT00000354052;OTTHUMT00000354053;OTTHUMT00000354054;uc003dxt.2;uc003dxu.2;uc021xch.1	RefSeq;RefSeq;RefSeq;ENSEMBL;ENSEMBL;ENSEMBL;ENSEMBL;GenBank;Havanatranscript;Havanatranscript;Havanatranscript;Havanatranscript;Havanatranscript;Havanatranscript;Havanatranscript;Havanatranscript;Havanatranscript;Havanatranscript;Havanatranscript;UCSCGenes;UCSCGenes;UCSCGenes	0.0337067
25961	TC10000457.hg.1	TC10000457.hg.1	chr10	+	74870210	74891586	160	21376	74870210	NUDT13	NUDT13;NUDT13;NUDT13;NUDT13;NUDT13;NUDT13;NUDT13;NUDT13;NUDT13;NUDT13;NUDT13;NUDT13;NUDT13;NUDT13;NUDT13;NUDT13;NUDT13;NUDT13;NUDT13	NUDT13	NM_015901;ENST00000349051;ENST00000357321;ENST00000372997;ENST00000488223;ENST00000537969;ENST00000544879;AK300980;AK303235;AK309755;AK316538;BC031224;BC038833;BC046173;OTTHUMT00000048612;OTTHUMT00000048613;OTTHUMT00000048614;OTTHUMT00000048615;OTTHUMT00000091160;uc001jtj.3;uc001jtk.3;uc001jtl.3;uc009xqw.3;uc010qkc.2;uc010qkd.2;uc010qke.2	RefSeq;ENSEMBL;ENSEMBL;ENSEMBL;ENSEMBL;ENSEMBL;ENSEMBL;GenBank;GenBank;GenBankHTC;GenBank;GenBank;GenBankHTC;GenBank;Havanatranscript;Havanatranscript;Havanatranscript;Havanatranscript;Havanatranscript;UCSCGenes;UCSCGenes;UCSCGenes;UCSCGenes;UCSCGenes;UCSCGenes;UCSCGenes	-0.0106477
26007	TC11002698.hg.1	TC11002698.hg.1	chr11	+	61114590	61116612	40	2022	61114590	TKFC	NA	NA	AK094516	NONCODE	0.00214105
26094	TC14000436.hg.1	TC14000436.hg.1	chr14	+	73393040	73426411	349	33371	73393040	DCAF4	DCAF4;DCAF4;DCAF4;DCAF4;DCAF4;DCAF4;DCAF4;DCAF4;DCAF4;DCAF4;DCAF4;DCAF4;DCAF4;DCAF4;DCAF4;DCAF4;DCAF4;DCAF4;DCAF4;DCAF4;DCAF4;DCAF4;DCAF4;DCAF4;DCAF4;DCAF4;DCAF4;DCAF4;DCAF4;DCAF4;DCAF4	DCAF4	NM_001163508;NM_001163509;NM_015604;NM_181340;NM_181341;ENST00000353777;ENST00000358377;ENST00000394234;ENST00000509153;ENST00000510612;ENST00000553457;ENST00000555042;AK297571;AL080157;BC018979;BC035901;BX161489;OTTHUMT00000361058;OTTHUMT00000361690;OTTHUMT00000361691;OTTHUMT00000361692;OTTHUMT00000361693;OTTHUMT00000361694;OTTHUMT00000361695;OTTHUMT00000361696;OTTHUMT00000361697;OTTHUMT00000361…	RefSeq;RefSeq;RefSeq;RefSeq;RefSeq;ENSEMBL;ENSEMBL;ENSEMBL;ENSEMBL;ENSEMBL;ENSEMBL;ENSEMBL;GenBank;GenBankHTC;GenBank;GenBank;GenBankHTC;Havanatranscript;Havanatranscript;Havanatranscript;Havanatranscript;Havanatranscript;Havanatranscript;Havanatranscript;Havanatranscript;Havanatranscript;Havanatranscript;Havanatranscript;UCSCGenes;UCSCGenes;UCSCGenes;UCSCGenes;UCSCGenes;UCSCGenes;UCSCGenes;UCSCG…	-0.00596049
2622	TC16000711.hg.1	TC16000711.hg.1	chr16	+	90086069	90111383	193	25314	90086069	GAS8	GAS8;GAS8;GAS8;GAS8;GAS8;GAS8;GAS8;GAS8;GAS8;GAS8;GAS8;GAS8;GAS8;GAS8;GAS8	GAS8	NM_001481;ENST00000268699;ENST00000536122;ENST00000537797;ENST00000540721;AK293958;AK294050;AK297857;AK303505;AK304731;BC036781;BC036781;BC104785;BX647947;NR_023348;OTTHUMT00000272877;uc002fqh.2;uc002fqi.1;uc002fqj.1;uc010cjc.1;uc010vps.1;uc010vpt.1;uc010vpu.1;uc010vpv.1;uc010vpw.1	RefSeq;ENSEMBL;ENSEMBL;ENSEMBL;ENSEMBL;GenBank;GenBank;GenBank;GenBank;GenBank;NONCODE;GenBank;GenBank;GenBank;NONCODE;Havanatranscript;UCSCGenes;UCSCGenes;UCSCGenes;UCSCGenes;UCSCGenes;UCSCGenes;UCSCGenes;UCSCGenes;UCSCGenes	0.00492608
26496	TC11003041.hg.1	TC11003041.hg.1	chr11	-	7960218	7960866	30	648	7960866	OR10A3	NA	NA	X64986;AF399634	NONCODE;NONCODE	-0.00340385
2650	TC09000350.hg.1	TC09000350.hg.1	chr9	+	79034752	79122332	163	87580	79034752	GCNT1	GCNT1;GCNT1;GCNT1;GCNT1;GCNT1;GCNT1;GCNT1;GCNT1;GCNT1;GCNT1;GCNT1;GCNT1;GCNT1;GCNT1;GCNT1;GCNT1;GCNT1;GCNT1;GCNT1;GCNT1	GCNT1	NM_001097633;NM_001097634;NM_001097635;NM_001097636;NM_001490;ENST00000376730;ENST00000442371;ENST00000444201;ENST00000488136;AK313343;BC074885;BC109101;BC109102;OTTHUMT00000052725;OTTHUMT00000052726;OTTHUMT00000052727;uc004akf.4;uc004akh.4;uc010mpf.3;uc010mpg.3;uc010mph.3;uc010mpi.3;ENST00000536223;uc022bif.1	RefSeq;RefSeq;RefSeq;RefSeq;RefSeq;ENSEMBL;ENSEMBL;ENSEMBL;ENSEMBL;GenBankHTC;GenBank;GenBank;GenBank;Havanatranscript;Havanatranscript;Havanatranscript;UCSCGenes;UCSCGenes;UCSCGenes;UCSCGenes;UCSCGenes;UCSCGenes;ENSEMBL;UCSCGenes	0.0118924
2650	TC09002021.hg.1	TC09002021.hg.1	chr9	+	79056582	79117213	30	60631	79056582	GCNT1	NA	NA	AY196293	NONCODE	0.0254796
26659	TC19001244.hg.1	TC19001244.hg.1	chr19	-	14937139	14945960	50	8821	14945960	OR7A5	OR7A5;OR7A5;OR7A5;OR7A5	OR7A5	NM_017506;ENST00000322301;AK312475;BC104809;uc002mzw.3;uc010xoa.2	RefSeq;ENSEMBL;GenBankHTC;GenBank;UCSCGenes;UCSCGenes	-0.000604434
26785	TC05001834.hg.1	TC05001834.hg.1	chr5	-	137896732	137896799	30	67	137896799	SNORD63	SNORD63;SNORD63;SNORD63;SNORD63;SNORD63;SNORD63	SNORD63	NR_002913;ENST00000384262;NR_002913;uc003ldg.3;uc003ldg.2	RefSeq;ENSEMBL;NONCODE;UCSCGenes;NONCODE	0.0158827
26789	TC12001611.hg.1	TC12001611.hg.1	chr12	-	57038811	57038885	30	74	57038885	SNORD59A	SNORD59A;SNORD59A;SNORD59A;SNORD59A;SNORD59A;SNORD59A;SNORD59A	SNORD59A	NR_002737;ENST00000384304;NR_002737;uc001slt.1;uc001slt.1	RefSeq;ENSEMBL;NONCODE;UCSCGenes;NONCODE	-0.0490066
26791	TC18000505.hg.1	TC18000505.hg.1	chr18	-	47017653	47017717	30	64	47017717	SNORD58A	RPL17;RPL17;RPL17;SNORD58A;SNORD58A;SNORD58A;RPL17;SNORD58A;SNORD58A;SNORD58A;RPL17;RPL17;SNORD58A	RPL17;SNORD58A	NR_002571;ENST00000383875;NR_002571;uc002lds.1;uc002lds.1	RefSeq;ENSEMBL;NONCODE;UCSCGenes;NONCODE	-0.0224986
26800;692087;692106;125144	TC17000189.hg.1	TC17000189.hg.1	chr17	+	16342289	16373962	320	31673	16342289	SNORD49A;SNORD49B;SNORD65;LRRC75A-AS1	FAM211A-AS1;FAM211A-AS1;FAM211A-AS1;FAM211A-AS1;C17orf76-AS1;FAM211A-AS1;FAM211A-AS1;FAM211A-AS1;SNORD49B;FAM211A-AS1;FAM211A-AS1;FAM211A-AS1;C17orf76-AS1;FAM211A-AS1;FAM211A-AS1;FAM211A-AS1;FAM211A-AS1;FAM211A-AS1;FAM211A-AS1;FAM211A-AS1;C17orf76-AS1;FAM211A-AS1;FAM211A-AS1;FAM211A-AS1;FAM211A-AS1;FAM211A-AS1;FAM211A-AS1;FAM211A-AS1;SNORD49A;C17orf76-AS1;FAM211A-AS1;FAM211A-AS1;FAM211A-AS1;FAM21…	FAM211A-AS1;C17orf76-AS1;SNORD49B;SNORD49A;SNORD65	NR_002744;NR_003043;NR_003054;NR_027158;NR_027159;NR_027160;NR_027161;NR_027162;NR_027163;NR_027164;NR_027165;NR_027166;NR_027167;NR_027168;NR_027169;NR_027170;NR_027171;NR_027172;NR_027173;NR_027174;NR_027175;NR_027176;NR_027177;NR_027178;NR_027179;NR_027667;NR_045021;NR_045022;NR_045023;NR_045024;NR_045025;NR_045026;NR_045027;NR_045028;NR_045029;ENST00000384229;ENST00000391079;ENST00000497774;B…	RefSeq;RefSeq;RefSeq;RefSeq;RefSeq;RefSeq;RefSeq;RefSeq;RefSeq;RefSeq;RefSeq;RefSeq;RefSeq;RefSeq;RefSeq;RefSeq;RefSeq;RefSeq;RefSeq;RefSeq;RefSeq;RefSeq;RefSeq;RefSeq;RefSeq;RefSeq;RefSeq;RefSeq;RefSeq;RefSeq;RefSeq;RefSeq;RefSeq;RefSeq;RefSeq;ENSEMBL;ENSEMBL;ENSEMBL;GenBank;GenBank;NONCODE;NONCODE;NONCODE;NONCODE;NONCODE;NONCODE;NONCODE;NONCODE;NONCODE;NONCODE;NONCODE;NONCODE;NONCODE;NONCODE;NO…	-0.0438543
27030	TC14001315.hg.1	TC14001315.hg.1	chr14	-	75480467	75518235	203	37768	75518235	MLH3	MLH3;MLH3;MLH3;MLH3;MLH3;MLH3;MLH3;MLH3;MLH3;MLH3;MLH3;MLH3	MLH3	NM_001040108;NM_014381;ENST00000355774;ENST00000380968;ENST00000555671;ENST00000556257;ENST00000556740;AK298777;BC112167;uc001xrd.1;uc001xre.1;uc010tuy.1;ENST00000238662;ENST00000544985	RefSeq;RefSeq;ENSEMBL;ENSEMBL;ENSEMBL;ENSEMBL;ENSEMBL;GenBank;GenBank;UCSCGenes;UCSCGenes;UCSCGenes;ENSEMBL;ENSEMBL	-0.0036859
27184	TC01003972.hg.1	TC01003972.hg.1	chr1	-	231950372	231954263	30	3891	231954263	DISC2	DISC2	DISC2	NR_002227;NR_002227;uc001hvd.3;DISC2	RefSeq;NONCODE;UCSCGenes;lncRNADb	0.0100394
27244	TC06001997.hg.1	TC06001997.hg.1	chr6	-	109307640	109416022	229	108382	109416022	SESN1	SESN1;SESN1;SESN1;SESN1;SESN1;SESN1;SESN1;SESN1;SESN1;SESN1;SESN1;SESN1;SESN1;SESN1;SESN1;SESN1;SESN1	SESN1	NM_001199933;NM_001199934;NM_014454;ENST00000302071;ENST00000356644;ENST00000436639;ENST00000517548;BC112036;BC113569;OTTHUMT00000041737;OTTHUMT00000041738;OTTHUMT00000041739;OTTHUMT00000377027;OTTHUMT00000377028;OTTHUMT00000377029;OTTHUMT00000377030;uc003pst.4;uc003psu.3;uc021zdp.1	RefSeq;RefSeq;RefSeq;ENSEMBL;ENSEMBL;ENSEMBL;ENSEMBL;GenBank;GenBank;Havanatranscript;Havanatranscript;Havanatranscript;Havanatranscript;Havanatranscript;Havanatranscript;Havanatranscript;UCSCGenes;UCSCGenes;UCSCGenes	0.0426066
27257	TC08001142.hg.1	TC08001142.hg.1	chr8	-	38020839	38034248	140	13409	38034248	LSM1	LSM1;LSM1;LSM1;LSM1;LSM1;LSM1;LSM1;LSM1;LSM1;LSM1;LSM1;LSM1	LSM1	NM_014462;NR_045492;NR_045493;ENST00000311351;ENST00000520755;ENST00000522515;BC001767;OTTHUMT00000376965;OTTHUMT00000376966;OTTHUMT00000376967;OTTHUMT00000376968;OTTHUMT00000376969;uc003xkw.3;uc003xkx.3;uc022atz.1	RefSeq;RefSeq;RefSeq;ENSEMBL;ENSEMBL;ENSEMBL;GenBank;Havanatranscript;Havanatranscript;Havanatranscript;Havanatranscript;Havanatranscript;UCSCGenes;UCSCGenes;UCSCGenes	-0.00358455
27302	TC02001945.hg.1	TC02001945.hg.1	chr2	-	69092613	69098649	40	6036	69098649	BMP10	BMP10;BMP10;BMP10	BMP10	NM_014482;ENST00000295379;BC069080;BC101734;OTTHUMT00000251768;uc002sez.1	RefSeq;ENSEMBL;GenBank;GenBank;Havanatranscript;UCSCGenes	0.0113599
27303	TC03000146.hg.1	TC03000146.hg.1	chr3	+	29224445	30051886	359	827441	29224445	RBMS3	RBMS3;RBMS3;RBMS3;RBMS3;RBMS3;RBMS3;RBMS3;RBMS3;RBMS3;RBMS3;RBMS3;RBMS3;RBMS3;RBMS3;RBMS3;RBMS3;RBMS3;RBMS3;RBMS3;RBMS3;RBMS3;RBMS3;RBMS3;RBMS3;RBMS3;RBMS3;RBMS3;RBMS3;RBMS3;RBMS3;RBMS3;RBMS3	RBMS3	NM_001003792;NM_001003793;NM_001177711;NM_001177712;NM_014483;ENST00000273139;ENST00000383766;ENST00000383767;ENST00000434693;ENST00000445033;ENST00000452462;ENST00000456853;ENST00000473799;BC117315;BC143521;OTTHUMT00000341298;OTTHUMT00000341299;OTTHUMT00000341300;OTTHUMT00000341301;OTTHUMT00000341302;OTTHUMT00000341303;OTTHUMT00000341304;OTTHUMT00000341306;OTTHUMT00000341324;OTTHUMT00000341325;O…	RefSeq;RefSeq;RefSeq;RefSeq;RefSeq;ENSEMBL;ENSEMBL;ENSEMBL;ENSEMBL;ENSEMBL;ENSEMBL;ENSEMBL;ENSEMBL;GenBank;GenBank;Havanatranscript;Havanatranscript;Havanatranscript;Havanatranscript;Havanatranscript;Havanatranscript;Havanatranscript;Havanatranscript;Havanatranscript;Havanatranscript;Havanatranscript;Havanatranscript;Havanatranscript;UCSCGenes;UCSCGenes;UCSCGenes;UCSCGenes;UCSCGenes;ENSEMBL	-0.0260138
27343	TC10002807.hg.1	TC10002807.hg.1	chr10	-	103338639	103348027	90	9388	103348027	POLL	NA	NA	NR_033406	NONCODE	0.00818619
27349	TC22000858.hg.1	TC22000858.hg.1	chr22	-	43528212	43539403	72	11191	43539403	MCAT	MCAT;MCAT;MCAT;MCAT;MCAT;MCAT;MCAT;MCAT;MCAT;MCAT	MCAT	NM_014507;NM_173467;ENST00000290429;ENST00000327555;ENST00000464244;BC042195;OTTHUMT00000319677;OTTHUMT00000319678;OTTHUMT00000319679;uc003bdl.1;uc003bdm.1	RefSeq;RefSeq;ENSEMBL;ENSEMBL;ENSEMBL;GenBank;Havanatranscript;Havanatranscript;Havanatranscript;UCSCGenes;UCSCGenes	0.0267414
27351	TC22000829.hg.1	TC22000829.hg.1	chr22	-	41994032	42017100	150	23068	42017100	DESI1	DESI1;DESI1;DESI1;DESI1;DESI1;DESI1;DESI1;DESI1	DESI1	NM_015704;ENST00000263256;ENST00000463886;BC093956;BC171724;OTTHUMT00000104124;OTTHUMT00000321672;OTTHUMT00000321902;OTTHUMT00000321903;uc003bam.2;uc011apb.2	RefSeq;ENSEMBL;ENSEMBL;GenBank;GenBank;Havanatranscript;Havanatranscript;Havanatranscript;Havanatranscript;UCSCGenes;UCSCGenes	0.00724238
27437	TC22000015.hg.1	TC22000015.hg.1	chr22	+	17308364	17310225	30	1861	17308364	HSFY1P1	HSFY1P1;HSFY1P1;HSFY1P1;HSFY1P1	HSFY1P1	NR_003607;ENST00000425038;uc010gqr.1;uc010gqr.1	RefSeq;ENSEMBL;UCSCGenes;NONCODE	-0.00061891
28	TC09001683.hg.1	TC09001683.hg.1	chr9	-	136130563	136150630	74	20067	136150630	ABO	ABO;ABO;ABO;ABO;ABO;ABO	ABO	NM_020469;ENST00000453660;AK302203;BC069595;BC069605;J05175;OTTHUMT00000054907;uc004cda.1;uc010naf.1;uc010nag.1;uc011mcz.1	RefSeq;ENSEMBL;GenBank;GenBank;GenBankHTC;GenBank;Havanatranscript;UCSCGenes;UCSCGenes;UCSCGenes;UCSCGenes	-0.00338335
283080	TC10000202.hg.1	TC10000202.hg.1	chr10	+	29135337	29170827	50	35490	29135337	C10orf126	C10orf126;C10orf126	C10orf126	OTTHUMT00000047379;ENST00000375520	Havanatranscript;ENSEMBL	-0.0140459
283460	TC12003126.hg.1	TC12003126.hg.1	chr12	-	121405937	121412502	50	6565	121412502	HNF1A-AS1	HNF1A-AS1	HNF1A-AS1	uc010szm.1;linc_luo_1320	NONCODE;NONCODE	0.00106547
283471	TC12000398.hg.1	TC12000398.hg.1	chr12	+	51236701	51281667	70	44966	51236701	TMPRSS12	TMPRSS12;TMPRSS12;TMPRSS12;TMPRSS12;TMPRSS12	TMPRSS12	NM_182559;ENST00000398458;ENST00000551456;BC035123;BC048112;uc001rwx.4;uc001rwy.3	RefSeq;ENSEMBL;ENSEMBL;GenBankHTC;GenBank;UCSCGenes;UCSCGenes	0.0161145
283516	TC13001071.hg.1	TC13001071.hg.1	chr13	+	46693992	46696834	30	2842	46693992	LOC283516	NA	NA	AK096235	NONCODE	0.00671819
2838	TC03000494.hg.1	TC03000494.hg.1	chr3	+	98250743	98251994	30	1251	98250743	GPR15	GPR15;GPR15	GPR15	NM_005290;ENST00000284311;BC069437;BC101779;BC101781;OTTHUMT00000358907;uc011bgy.2	RefSeq;ENSEMBL;GenBank;GenBank;GenBank;Havanatranscript;UCSCGenes	-0.00873148
284071	TC17000572.hg.1	TC17000572.hg.1	chr17	+	42733762	42767676	272	33914	42733762	MEIOC	C17orf104;C17orf104;C17orf104;C17orf104;C17orf104;C17orf104;C17orf104;C17orf104;C17orf104;C17orf104;C17orf104;C17orf104;C17orf104;C17orf104;C17orf104	C17orf104	NM_001145080;ENST00000409122;ENST00000409464;ENST00000472403;AK302001;BC035159;BC132822;OTTHUMT00000329170;OTTHUMT00000329171;OTTHUMT00000329172;OTTHUMT00000329173;OTTHUMT00000329174;OTTHUMT00000329175;ENST00000359945;uc002igy.1;uc002igz.3;uc002iha.3;uc010wja.1	RefSeq;ENSEMBL;ENSEMBL;ENSEMBL;GenBank;GenBank;GenBank;Havanatranscript;Havanatranscript;Havanatranscript;Havanatranscript;Havanatranscript;Havanatranscript;ENSEMBL;UCSCGenes;UCSCGenes;UCSCGenes;UCSCGenes	0.0318221
284071	TC17002226.hg.1	TC17002226.hg.1	chr17	+	42746749	42767676	100	20927	42746749	MEIOC	NA	NA	AK097747	NONCODE	0.00721243
2842	TC12001256.hg.1	TC12001256.hg.1	chr12	-	12813825	12849121	103	35296	12849121	GPR19	GPR19;GPR19;GPR19;GPR19;GPR19;GPR19;GPR19;GPR19	GPR19	NM_006143;ENST00000332427;ENST00000537507;ENST00000540510;AK074729;AK096388;BC150599;uc001raq.2;uc001rar.3;uc001ras.1;uc021qvj.1	RefSeq;ENSEMBL;ENSEMBL;ENSEMBL;GenBank;GenBank;GenBank;UCSCGenes;UCSCGenes;UCSCGenes;UCSCGenes	-0.00160322
28420	TC14002274.hg.1	TC14002274.hg.1	chr14	-	107048672	107049341	30	669	107049341	IGHV3-53	IGHV3-53;IGHV3-53	IGHV3-53	OTTHUMT00000324612;ENST00000390627	Havanatranscript;ENSEMBL	-0.00811234
28434	TC14002263.hg.1	TC14002263.hg.1	chr14	-	106815722	106816253	30	531	106816253	IGHV3-33	IGHV3-33;IGHV3-33	IGHV3-33	OTTHUMT00000325171;ENST00000390615	Havanatranscript;ENSEMBL	-0.0111114
284415	TC19001829.hg.1	TC19001829.hg.1	chr19	-	54544079	54567207	163	23128	54567207	VSTM1	VSTM1;VSTM1;VSTM1;VSTM1;VSTM1;VSTM1;VSTM1;VSTM1;VSTM1;VSTM1;VSTM1;VSTM1	VSTM1	NM_198481;ENST00000338372;ENST00000366170;ENST00000376626;ENST00000425006;BC100942;BC100943;FJ584318;FJ584319;FJ584320;FJ882051;OTTHUMT00000139358;OTTHUMT00000139362;OTTHUMT00000139380;uc002qcw.4;uc002qcx.4;uc021vbe.1;uc010erb.3;uc021vbf.1;uc021vbg.1	RefSeq;ENSEMBL;ENSEMBL;ENSEMBL;ENSEMBL;GenBank;GenBank;GenBank;GenBank;GenBank;GenBank;Havanatranscript;Havanatranscript;Havanatranscript;UCSCGenes;UCSCGenes;UCSCGenes;UCSCGenes;UCSCGenes;UCSCGenes	0.00822457
284422	TC19001042.hg.1	TC19001042.hg.1	chr19	-	3474405	3480540	50	6135	3480540	SMIM24	C19orf77;C19orf77;C19orf77	C19orf77	NM_001136503;ENST00000215531;BC146979;uc010xhk.1	RefSeq;ENSEMBL;GenBank;UCSCGenes	0.0096275
28448	TC14002252.hg.1	TC14002252.hg.1	chr14	-	106610313	106610852	30	539	106610852	IGHV3-15	IGHV3-15;IGHV3-15	IGHV3-15	OTTHUMT00000325670;ENST00000390603	Havanatranscript;ENSEMBL	-0.0115709
28452	TC14002247.hg.1	TC14002247.hg.1	chr14	-	106518400	106518932	30	532	106518932	IGHV3-7	IGHV3-7;IGHV3-7	IGHV3-7	OTTHUMT00000325659;ENST00000390598	Havanatranscript;ENSEMBL	-0.0370893
284578	TC01006058.hg.1	TC01006058.hg.1	chr1	-	205523401	205525763	30	2362	205525763	LOC284578	LOC284578	LOC284578	uc001hcu.2;AX746585	NONCODE;NONCODE	-0.00990959
284648	TC01001579.hg.1	TC01001579.hg.1	chr1	+	182584275	182585764	30	1489	182584275	LOC284648	LOC284648;;	LOC284648	NR_036490;NR_036490;uc021pfy.1	RefSeq;NONCODE;UCSCGenes	-0.000463348
28501	TC14002240.hg.1	TC14002240.hg.1	chr14	-	106380218	106380248	6	30	106380248	IGHD3-3	IGHD3-3;IGHD3-3	IGHD3-3	OTTHUMT00000325964;ENST00000390590	Havanatranscript;ENSEMBL	-0.00111333
285043	TC02000200.hg.1	TC02000200.hg.1	chr2	+	30569525	30575297	40	5772	30569525	LOC285043	AK123934;AK123934;	AK123934	AK123934;ENST00000421976;OTTHUMT00000325099;uc002rnf.1;uc002rng.2;uc002rng.3	GenBank;ENSEMBL;NONCODE;UCSCGenes;NONCODE;UCSCGenes	-0.0190544
28505	TC14002241.hg.1	TC14002241.hg.1	chr14	-	106382685	106382715	6	30	106382715	IGHD2-2	IGHD2-2;IGHD2-2	IGHD2-2	OTTHUMT00000325962;ENST00000390591	Havanatranscript;ENSEMBL	-0.00605664
285084	TC02003699.hg.1	TC02003699.hg.1	chr2	+	175190755	175195371	60	4616	175190755	LINC01305	NA	NA	AL833646;TCONS_00003051-XLOC_001759;TCONS_00003052	NONCODE;RinnlincRNA;NONCODE	0.00567029
28514	TC06002342.hg.1	TC06002342.hg.1	chr6	-	170591294	170599697	160	8403	170599697	DLL1	DLL1;DLL1;DLL1;DLL1;DLL1	DLL1	NM_005618;ENST00000366756;BC028096;EU927387;OTTHUMT00000043254;uc003qxm.3;uc003qxn.3;uc011ehc.1	RefSeq;ENSEMBL;GenBankHTC;GenBank;Havanatranscript;UCSCGenes;UCSCGenes;UCSCGenes	-0.0179778
285220	TC03000478.hg.1	TC03000478.hg.1	chr3	+	96533425	97471304	408	937879	96533425	EPHA6	EPHA6;EPHA6;EPHA6;EPHA6;EPHA6;EPHA6;EPHA6;EPHA6;EPHA6;EPHA6;EPHA6;EPHA6;EPHA6;EPHA6;EPHA6;EPHA6;EPHA6;EPHA6;EPHA6	EPHA6	NM_001080448;NM_173655;ENST00000389672;ENST00000470610;ENST00000502694;ENST00000514100;AK302040;AK302080;AK310249;BC031881;BC067287;OTTHUMT00000353837;OTTHUMT00000353845;OTTHUMT00000359271;OTTHUMT00000359272;OTTHUMT00000359974;OTTHUMT00000359996;OTTHUMT00000359997;OTTHUMT00000359998;OTTHUMT00000360072;uc010how.1;ENST00000442602;ENST00000542517;uc003drp.1;uc003drr.4;uc003drs.4;uc003drt.3;uc010hox.…	RefSeq;RefSeq;ENSEMBL;ENSEMBL;ENSEMBL;ENSEMBL;GenBank;GenBank;GenBankHTC;GenBankHTC;GenBankHTC;Havanatranscript;Havanatranscript;Havanatranscript;Havanatranscript;Havanatranscript;Havanatranscript;Havanatranscript;Havanatranscript;Havanatranscript;UCSCGenes;ENSEMBL;ENSEMBL;UCSCGenes;UCSCGenes;UCSCGenes;UCSCGenes;UCSCGenes;UCSCGenes;UCSCGenes	-0.00335864
285381	TC03001215.hg.1	TC03001215.hg.1	chr3	-	16298568	16306496	100	7928	16306496	DPH3	DPH3;DPH3;DPH3;DPH3;DPH3;DPH3;DPH3;DPH3;DPH3;DPH3;DPH3;DPH3	DPH3	NM_001047434;NM_206831;ENST00000285082;ENST00000383775;ENST00000488423;AK311618;BC010181;OTTHUMT00000252108;OTTHUMT00000346770;OTTHUMT00000346771;OTTHUMT00000346772;uc003cat.4;uc003cau.3;uc003cav.3	RefSeq;RefSeq;ENSEMBL;ENSEMBL;ENSEMBL;GenBankHTC;GenBank;Havanatranscript;Havanatranscript;Havanatranscript;Havanatranscript;UCSCGenes;UCSCGenes;UCSCGenes	-0.00680426
285386	TC03001041.hg.1	TC03001041.hg.1	chr3	+	188665003	189043093	386	378090	188665003	TPRG1	TPRG1;TPRG1;TPRG1;TPRG1;TPRG1;TPRG1;TPRG1;TPRG1;TPRG1;TPRG1;TPRG1;TPRG1;TPRG1;TPRG1;TPRG1;TPRG1;TPRG1;TPRG1;TPRG1;TPRG1	TPRG1	NM_198485;ENST00000345063;ENST00000433971;ENST00000488841;AK123232;BC101550;BC101552;OTTHUMT00000343931;OTTHUMT00000343932;OTTHUMT00000343933;OTTHUMT00000343934;OTTHUMT00000343935;OTTHUMT00000343936;OTTHUMT00000343937;OTTHUMT00000343938;OTTHUMT00000343939;OTTHUMT00000343940;OTTHUMT00000343941;OTTHUMT00000343942;OTTHUMT00000343943;OTTHUMT00000343944;OTTHUMT00000343945;uc003frv.2;uc003frw.2	RefSeq;ENSEMBL;ENSEMBL;ENSEMBL;GenBank;GenBank;GenBank;Havanatranscript;Havanatranscript;Havanatranscript;Havanatranscript;Havanatranscript;Havanatranscript;Havanatranscript;Havanatranscript;Havanatranscript;Havanatranscript;Havanatranscript;Havanatranscript;Havanatranscript;Havanatranscript;Havanatranscript;UCSCGenes;UCSCGenes	0.0248452
28552	TC09000151.hg.1	TC09000151.hg.1	chr9	+	33638033	33638501	30	468	33638033	TRBV23OR9-2	TRBV23OR9-2;TRBV23OR9-2	TRBV23OR9-2	OTTHUMT00000052082;ENST00000390389	Havanatranscript;ENSEMBL	0.0121837
286178	TC08001934.hg.1	TC08001934.hg.1	chr8	+	58658708	58662754	40	4046	58658708	LOC286178	NA	NA	AK090741;TCONS_00014492-XLOC_006809	NONCODE;RinnlincRNA	0.00281535
28791	TC22001441.hg.1	TC22001441.hg.1	chr22	+	23010758	23011276	20	518	23010758	IGLV3-27	IGLV3-27;IGLV3-27	IGLV3-27	OTTHUMT00000321641;ENST00000390304	Havanatranscript;ENSEMBL	-0.00433399
2907	TC08000835.hg.1	TC08000835.hg.1	chr8	+	145064226	145067583	120	3357	145064226	GRINA	GRINA;GRINA;GRINA;GRINA;GRINA;GRINA;GRINA	GRINA	NM_000837;NM_001009184;ENST00000313269;ENST00000395068;AK127640;BC041788;BC084553;uc003zan.1;uc003zao.1;uc003zap.1;ENST00000537637	RefSeq;RefSeq;ENSEMBL;ENSEMBL;GenBank;GenBank;GenBank;UCSCGenes;UCSCGenes;UCSCGenes;ENSEMBL	0.0172546
291	TC04002365.hg.1	TC04002365.hg.1	chr4	+	186069155	186071536	30	2381	186069155	SLC25A4	NA	NA	AF052119	NONCODE	0.000629865
2952	TC22000583.hg.1	TC22000583.hg.1	chr22	-	24376133	24384680	170	8547	24384680	GSTT1	GSTT1;GSTT1;GSTT1;GSTT1;GSTT1;GSTT1;GSTT1;GSTT1;GSTT1;GSTT1;GSTT1;GSTT1;GSTT1;GSTT1;GSTT1;GSTT1;GSTT1;GSTT1;GSTT1	GSTT1	NM_000853;AJ867758;AJ867758;AJ874719;AK311138;BC007065;CR456499;uc002zze.4;uc010gug.3;uc010guh.3;uc010gui.1;ENST00000248935;ENST00000382792;ENST00000439996;ENST00000452369;OTTHUMT00000320184;OTTHUMT00000320185;OTTHUMT00000320186;OTTHUMT00000320187;OTTHUMT00000320188;OTTHUMT00000320189;OTTHUMT00000320190;OTTHUMT00000320191;OTTHUMT00000320192;OTTHUMT00000320193;OTTHUMT00000322309;OTTHUMT00000341025…	RefSeq;NONCODE;GenBank;GenBank;GenBankHTC;GenBank;GenBank;UCSCGenes;UCSCGenes;UCSCGenes;UCSCGenes;ENSEMBL;ENSEMBL;ENSEMBL;ENSEMBL;Havanatranscript;Havanatranscript;Havanatranscript;Havanatranscript;Havanatranscript;Havanatranscript;Havanatranscript;Havanatranscript;Havanatranscript;Havanatranscript;Havanatranscript;Havanatranscript;UCSCGenes	0.000706571
2966	TC05003055.hg.1	TC05003055.hg.1	chr5	-	69733322	69734405	30	1083	69734405	GTF2H2	NA	NA	U21915	NONCODE	-0.00872947
2990	TC07001457.hg.1	TC07001457.hg.1	chr7	-	65425671	65447301	297	21630	65447301	GUSB	GUSB;GUSB;GUSB;GUSB;GUSB;GUSB;GUSB;GUSB;GUSB;GUSB;GUSB;GUSB;GUSB;GUSB;GUSB;GUSB;GUSB;GUSB;GUSB;GUSB;GUSB;GUSB	GUSB	NM_000181;ENST00000304895;ENST00000421103;ENST00000476486;AK303819;AK311273;BC014142;OTTHUMT00000251637;OTTHUMT00000344645;OTTHUMT00000344647;OTTHUMT00000344648;OTTHUMT00000345090;OTTHUMT00000345091;OTTHUMT00000345092;OTTHUMT00000345093;OTTHUMT00000345094;OTTHUMT00000345095;OTTHUMT00000345096;OTTHUMT00000345097;OTTHUMT00000345098;OTTHUMT00000345099;uc003tun.3;uc010kzw.2;uc011kdt.2;ENST00000345660…	RefSeq;ENSEMBL;ENSEMBL;ENSEMBL;GenBank;GenBankHTC;GenBank;Havanatranscript;Havanatranscript;Havanatranscript;Havanatranscript;Havanatranscript;Havanatranscript;Havanatranscript;Havanatranscript;Havanatranscript;Havanatranscript;Havanatranscript;Havanatranscript;Havanatranscript;Havanatranscript;UCSCGenes;UCSCGenes;UCSCGenes;ENSEMBL;Havanatranscript;Havanatranscript	0.00225772
29974	TC10002643.hg.1	TC10002643.hg.1	chr10	-	52559793	52565728	40	5935	52565728	A1CF	NA	NA	CR749831	NONCODE	-0.000285652
29993	TC06000504.hg.1	TC06000504.hg.1	chr6	+	34433853	34504039	190	70186	34433853	PACSIN1	PACSIN1;PACSIN1;PACSIN1;PACSIN1;PACSIN1;PACSIN1;PACSIN1;PACSIN1;PACSIN1;PACSIN1;PACSIN1	PACSIN1	NM_001199583;NM_020804;ENST00000244458;ENST00000374043;ENST00000486120;ENST00000538621;BC040228;ENST00000436831;OTTHUMT00000040236;OTTHUMT00000040237;OTTHUMT00000040238;OTTHUMT00000040239;OTTHUMT00000040240;uc003ojo.3;uc003ojp.3	RefSeq;RefSeq;ENSEMBL;ENSEMBL;ENSEMBL;ENSEMBL;GenBank;ENSEMBL;Havanatranscript;Havanatranscript;Havanatranscript;Havanatranscript;Havanatranscript;UCSCGenes;UCSCGenes	-0.00116363
3040;3039	TC16000007.hg.1	TC16000007.hg.1	chr16	+	222846	223709	80	863	222846	HBA2;HBA1	HBA2;HBA2;HBA2;HBA2;HBA2;HBA2;HBA2	HBA2	NM_000517;ENST00000251595;ENST00000397806;BC008572;OTTHUMT00000133194;OTTHUMT00000133195;OTTHUMT00000133196;OTTHUMT00000133199;uc002cfv.4;ENST00000534957	RefSeq;ENSEMBL;ENSEMBL;GenBank;Havanatranscript;Havanatranscript;Havanatranscript;Havanatranscript;UCSCGenes;ENSEMBL	0.0131585
3075	TC01006291.hg.1	TC01006291.hg.1	chr1	+	196621008	196716634	310	95626	196621008	CFH	CFH;CFH;CFH;CFH;CFH;CFH;CFH;CFH;CFH;CFH;CFH;CFH;CFH;CFH;CFH	CFH	NM_000186;NM_001014975;ENST00000359637;ENST00000367429;ENST00000496761;AK225649;BC012610;BC142699;OTTHUMT00000086412;OTTHUMT00000087502;OTTHUMT00000087503;OTTHUMT00000088705;OTTHUMT00000317692;uc001gti.4;uc001gtj.4;uc009wyw.3;uc009wyx.3;ENST00000391986;ENST00000439155	RefSeq;RefSeq;ENSEMBL;ENSEMBL;ENSEMBL;GenBank;GenBank;GenBank;Havanatranscript;Havanatranscript;Havanatranscript;Havanatranscript;Havanatranscript;UCSCGenes;UCSCGenes;UCSCGenes;UCSCGenes;ENSEMBL;ENSEMBL	0.0171269
3140	TC01004870.hg.1	TC01004870.hg.1	chr1	+	181028571	181031073	30	2502	181028571	MR1	NA	NA	AK056155	NONCODE	0.000851132
319101	TC12001530.hg.1	TC12001530.hg.1	chr12	-	53001354	53012343	110	10989	53012343	KRT73	KRT73;KRT73;KRT73	KRT73	NM_175068;ENST00000305748;BC109212;uc001sas.3	RefSeq;ENSEMBL;GenBank;UCSCGenes	0.000757471
319103	TC14000919.hg.1	TC14000919.hg.1	chr14	-	21865451	21865560	30	109	21865560	SNORD8	SNORD8;SNORD8;SNORD8;SNORD8;SNORD8;SNORD8;SNORD8	SNORD8	NR_002916;ENST00000363915;NR_002916;uc001wau.1;uc001wau.1	RefSeq;ENSEMBL;NONCODE;UCSCGenes;NONCODE	0.00248328
3203	TC07001222.hg.1	TC07001222.hg.1	chr7	-	27185015	27190222	60	5207	27190222	HOXA6	HOXA6;HOXA6;HOXA6;HOXA6;HOXA6	HOXA6	NM_024014;ENST00000222728;ENST00000521478;BC069497;BC104915;BC104917;OTTHUMT00000139963;OTTHUMT00000358697;uc003syo.2	RefSeq;ENSEMBL;ENSEMBL;GenBank;GenBank;GenBank;Havanatranscript;Havanatranscript;UCSCGenes	0.000915427
3248	TC04001753.hg.1	TC04001753.hg.1	chr4	-	175411328	175444305	256	32977	175444305	HPGD	HPGD;HPGD;HPGD;HPGD;HPGD;HPGD;HPGD;HPGD;HPGD;HPGD;HPGD;HPGD;HPGD;HPGD;HPGD;HPGD;HPGD;HPGD;HPGD;HPGD;HPGD;HPGD;HPGD;HPGD;HPGD;HPGD	HPGD	NM_000860;NM_001145816;NM_001256301;NM_001256305;NM_001256306;NM_001256307;ENST00000296521;ENST00000296522;ENST00000422112;ENST00000504433;ENST00000510901;ENST00000541923;ENST00000542498;AK300125;AK300524;BC018986;OTTHUMT00000362228;OTTHUMT00000362232;OTTHUMT00000362233;OTTHUMT00000362234;OTTHUMT00000362235;OTTHUMT00000362236;OTTHUMT00000362237;OTTHUMT00000362239;OTTHUMT00000362375;OTTHUMT0000036…	RefSeq;RefSeq;RefSeq;RefSeq;RefSeq;RefSeq;ENSEMBL;ENSEMBL;ENSEMBL;ENSEMBL;ENSEMBL;ENSEMBL;ENSEMBL;GenBank;GenBank;GenBank;Havanatranscript;Havanatranscript;Havanatranscript;Havanatranscript;Havanatranscript;Havanatranscript;Havanatranscript;Havanatranscript;Havanatranscript;Havanatranscript;Havanatranscript;Havanatranscript;GenBank;UCSCGenes;RefSeq;NONCODE;UCSCGenes;UCSCGenes;UCSCGenes;UCSCGenes;…	-0.0220949
3268	TC07000625.hg.1	TC07000625.hg.1	chr7	+	100136834	100165843	207	29009	100136834	AGFG2	AGFG2;AGFG2;AGFG2;AGFG2;AGFG2;AGFG2;AGFG2;AGFG2;AGFG2;AGFG2;AGFG2	AGFG2	NM_006076;ENST00000300176;ENST00000474713;BC009393;BC017329;OTTHUMT00000342769;OTTHUMT00000342770;OTTHUMT00000342771;OTTHUMT00000342772;OTTHUMT00000342773;uc003uvf.3;uc003uvg.1;ENST00000262935	RefSeq;ENSEMBL;ENSEMBL;GenBank;GenBank;Havanatranscript;Havanatranscript;Havanatranscript;Havanatranscript;Havanatranscript;UCSCGenes;UCSCGenes;ENSEMBL	0.0210561
3299	TC16001605.hg.1	TC16001605.hg.1	chr16	+	67198716	67203846	140	5130	67198716	HSF4	NA	NA	D87673	NONCODE	0.000804738
338322	TC11001381.hg.1	TC11001381.hg.1	chr11	-	7980971	7985204	50	4233	7985204	NLRP10	NLRP10;NLRP10;NLRP10	NLRP10	NM_176821;ENST00000328600;BC104957;uc001mfv.1	RefSeq;ENSEMBL;GenBank;UCSCGenes	-0.00490552
338811	TC12001650.hg.1	TC12001650.hg.1	chr12	-	62102029	62653925	222	551896	62653925	FAM19A2	FAM19A2;FAM19A2;FAM19A2;FAM19A2;AK128013;FAM19A2;FAM19A2;FAM19A2;FAM19A2;FAM19A2;FAM19A2	FAM19A2;AK128013	NM_178539;ENST00000416284;ENST00000549456;ENST00000550003;ENST00000551449;ENST00000551619;AK123580;AK128013;BC028403;BC040286;CR749367;uc001sqv.3;uc001sqw.3;uc001sqx.3;uc001sqy.3;uc001sqz.1	RefSeq;ENSEMBL;ENSEMBL;ENSEMBL;ENSEMBL;ENSEMBL;GenBank;GenBank;GenBank;GenBank;GenBankHTC;UCSCGenes;UCSCGenes;UCSCGenes;UCSCGenes;UCSCGenes	0.0274722
338864	TC13000281.hg.1	TC13000281.hg.1	chr13	+	75126980	75131257	60	4277	75126980	LINC00347	LINC00347;LINC00347;LINC00347;LINC00347;LINC00347;LINC00347;LINC00347;LINC00347	LINC00347	NR_034024;NR_034025;uc001vjk.3;uc021rkp.1;ENST00000446691;ENST00000451336;OTTHUMT00000045276;OTTHUMT00000045277	RefSeq;RefSeq;UCSCGenes;UCSCGenes;ENSEMBL;ENSEMBL;NONCODE;NONCODE	-0.00305807
339256	TC17000258.hg.1	TC17000258.hg.1	chr17	+	20340137	20350557	50	10420	20340137	NOS2P3	BC044655;NOS2P3;NOS2P3	BC044655;NOS2P3	BC044655;OTTHUMT00000253234;ENST00000458685;uc002gwy.3	NONCODE;Havanatranscript;ENSEMBL;UCSCGenes	-0.00830768
339263	TC17002558.hg.1	TC17002558.hg.1	chr17	-	21435876	21477731	40	41855	21477731	C17orf51	NA	NA	AK090937	NONCODE	0.00206688
339483	TC01002465.hg.1	TC01002465.hg.1	chr1	-	32697261	32707311	110	10050	32707311	MTMR9LP	MTMR9LP;MTMR9LP;MTMR9LP;MTMR9LP;MTMR9LP	MTMR9LP	NR_026850;AL833686;uc001buv.4;uc010ohb.2;ENST00000441044;BC015407;uc001but.2;uc001but.3;uc001buv.3;uc010ohb.1	RefSeq;GenBank;UCSCGenes;UCSCGenes;ENSEMBL;GenBankHTC;NONCODE;UCSCGenes;NONCODE;NONCODE	-0.0144592
339975	TC04002894.hg.1	TC04002894.hg.1	chr4	-	188225237	188426767	80	201530	188426767	LOC339975	NA	NA	BC042049;TCONS_00007930;TCONS_l2_00021474-XLOC_l2_011411;TCONS_l2_00021475-XLOC_l2_011411	NONCODE;NONCODE;BroadTUCP;BroadTUCP	-0.00376061
340075	TC05001935.hg.1	TC05001935.hg.1	chr5	-	149675906	149718870	76	42964	149718870	ARSI	ARSI;ARSI;ARSI;ARSI;ARSI	ARSI	NM_001012301;ENST00000328668;BC129995;OTTHUMT00000373681;OTTHUMT00000373682;OTTHUMT00000373683;uc003lrv.2	RefSeq;ENSEMBL;GenBank;Havanatranscript;Havanatranscript;Havanatranscript;UCSCGenes	0.00122155
341359	TC12001380.hg.1	TC12001380.hg.1	chr12	-	33527173	33592754	120	65581	33592754	SYT10	SYT10;SYT10;SYT10;SYT10;SYT10	SYT10	NM_198992;ENST00000228567;BC101024;BC101025;uc001rll.1;uc009zju.1;ENST00000535526	RefSeq;ENSEMBL;GenBank;GenBank;UCSCGenes;UCSCGenes;ENSEMBL	0.000765097
344838	TC03003124.hg.1	TC03003124.hg.1	chr3	-	142668006	142681399	40	13393	142681399	PAQR9	NA	NA	AK093381	NONCODE	-0.00115576
3451	TC09000954.hg.1	TC09000954.hg.1	chr9	-	21227242	21228221	30	979	21228221	IFNA17	IFNA17;IFNA17;IFNA17	IFNA17	NM_021268;ENST00000413767;BC096732;OTTHUMT00000051896;uc003zos.1	RefSeq;ENSEMBL;GenBank;Havanatranscript;UCSCGenes	-0.00146999
346389	TC07002818.hg.1	TC07002818.hg.1	chr7	-	20179588	20180103	30	515	20180103	MACC1	NA	NA	AF086401	NONCODE	0.0138837
347051	TC08001369.hg.1	TC08001369.hg.1	chr8	-	82605842	82608409	40	2567	82608409	SLC10A5	SLC10A5;SLC10A5;SLC10A5	SLC10A5	NM_001010893;ENST00000518568;BC136625;OTTHUMT00000379736;uc011lfs.2	RefSeq;ENSEMBL;GenBank;Havanatranscript;UCSCGenes	0.00104517
347694	TC02004852.hg.1	TC02004852.hg.1	chr2	-	233250460	233251754	30	1294	233251754	ECEL1P2	ECEL1P2	ECEL1P2	NR_028501	NONCODE	-0.00562369
3480	TC15000949.hg.1	TC15000949.hg.1	chr15	+	99192200	99507759	270	315559	99192200	IGF1R	IGF1R;IGF1R;IGF1R;IGF1R;IGF1R;IGF1R;IGF1R;IGF1R;IGF1R	IGF1R	NM_000875;ENST00000268035;ENST00000558762;ENST00000560432;AY429545;BC113610;BC143721;EU826611;EU826612;OTTHUMT00000313537;uc002bul.3;uc010boo.1;uc010urq.2;uc010urr.1;uc010bon.3	RefSeq;ENSEMBL;ENSEMBL;ENSEMBL;GenBank;GenBank;GenBank;GenBank;GenBank;Havanatranscript;UCSCGenes;UCSCGenes;UCSCGenes;UCSCGenes;UCSCGenes	-0.00575181
348840	TC03003312.hg.1	TC03003312.hg.1	chr3	-	197784404	197807542	100	23138	197807542	ANKRD18DP	ANKRD18DP;ANKRD18DP	ANKRD18DP	uc003fyx.3;uc010iat.2	NONCODE;NONCODE	0.0146255
349565	TC03001835.hg.1	TC03001835.hg.1	chr3	-	139279022	139396885	241	117863	139396885	NMNAT3	NMNAT3;NMNAT3;NMNAT3;NMNAT3;NMNAT3;NMNAT3;NMNAT3;NMNAT3;NMNAT3;NMNAT3;NMNAT3;NMNAT3;NMNAT3;NMNAT3;NMNAT3;NMNAT3;NMNAT3;NMNAT3;NMNAT3;NMNAT3;NMNAT3;NMNAT3;NMNAT3;NMNAT3;NMNAT3;NMNAT3;NMNAT3;NMNAT3;NMNAT3	NMNAT3	NM_001200047;NM_178177;ENST00000296202;ENST00000339837;ENST00000406164;ENST00000413939;ENST00000507242;ENST00000511444;ENST00000512391;ENST00000514703;AF345564;BC034374;BC036218;OTTHUMT00000358466;OTTHUMT00000358467;OTTHUMT00000358468;OTTHUMT00000358469;OTTHUMT00000358470;OTTHUMT00000358471;OTTHUMT00000358472;OTTHUMT00000358473;OTTHUMT00000358474;OTTHUMT00000358475;OTTHUMT00000358476;OTTHUMT00000…	RefSeq;RefSeq;ENSEMBL;ENSEMBL;ENSEMBL;ENSEMBL;ENSEMBL;ENSEMBL;ENSEMBL;ENSEMBL;GenBankHTC;GenBank;GenBank;Havanatranscript;Havanatranscript;Havanatranscript;Havanatranscript;Havanatranscript;Havanatranscript;Havanatranscript;Havanatranscript;Havanatranscript;Havanatranscript;Havanatranscript;Havanatranscript;Havanatranscript;Havanatranscript;UCSCGenes;UCSCGenes;UCSCGenes;UCSCGenes;ENSEMBL	0.0241477
3508	TC11000712.hg.1	TC11000712.hg.1	chr11	+	68671310	68708070	220	36760	68671310	IGHMBP2	IGHMBP2;IGHMBP2;IGHMBP2;IGHMBP2;IGHMBP2;IGHMBP2;IGHMBP2;IGHMBP2	IGHMBP2	NM_002180;ENST00000255078;ENST00000539224;ENST00000543739;AB208802;AK123166;BC105088;uc001ooj.1;uc001ook.1;uc001ool.1;uc001oom.1	RefSeq;ENSEMBL;ENSEMBL;ENSEMBL;GenBank;GenBank;GenBank;UCSCGenes;UCSCGenes;UCSCGenes;UCSCGenes	-0.00718659
359821	TC15002497.hg.1	TC15002497.hg.1	chr15	-	40824083	40824749	30	666	40824749	MRPL42P5	NA	NA	NR_002208	NONCODE	-0.00398149
359822	TC04001077.hg.1	TC04001077.hg.1	chr4	-	21844964	21854811	30	9847	21854811	KCNIP4-IT1	KCNIP4-IT1	KCNIP4-IT1	NR_002813;uc003gqj.1	RefSeq;UCSCGenes	-0.0129704
3641	TC09000036.hg.1	TC09000036.hg.1	chr9	+	5231402	5235304	30	3902	5231402	INSL4	INSL4;INSL4;INSL4	INSL4	NM_002195;ENST00000239316;BC026254;OTTHUMT00000051616;uc003ziy.3	RefSeq;ENSEMBL;GenBank;Havanatranscript;UCSCGenes	0.000134584
3706	TC15000309.hg.1	TC15000309.hg.1	chr15	+	41785591	41795757	120	10166	41785591	ITPKA	ITPKA;ITPKA;ITPKA;ITPKA;ITPKA;ITPKA;ITPKA	ITPKA	NM_002220;ENST00000260386;ENST00000462816;BC026331;OTTHUMT00000252695;OTTHUMT00000258279;OTTHUMT00000258280;OTTHUMT00000258281;uc001znz.3	RefSeq;ENSEMBL;ENSEMBL;GenBank;Havanatranscript;Havanatranscript;Havanatranscript;Havanatranscript;UCSCGenes	0.00258019
373863	TC05001864.hg.1	TC05001864.hg.1	chr5	-	140050379	140053171	40	2792	140053171	DND1	DND1;DND1;DND1	DND1	NM_194249;ENST00000542735;BC033496;OTTHUMT00000251669;uc003lgt.3	RefSeq;ENSEMBL;GenBank;Havanatranscript;UCSCGenes	0.0037203
374977	TC01006323.hg.1	TC01006323.hg.1	chr1	+	55107427	55175939	424	68512	55107427	MROH7	MROH7;MROH7;MROH7;MROH7;MROH7;MROH7;MROH7;MROH7;MROH7;MROH7;MROH7;MROH7;MROH7;MROH7;MROH7;MROH7;MROH7;MROH7;MROH7;MROH7;MROH7;MROH7;MROH7;MROH7;MROH7;MROH7;MROH7;MROH7;MROH7;MROH7;MROH7;MROH7	MROH7	NM_001039464;NR_026782;ENST00000339553;ENST00000371287;ENST00000395690;ENST00000409996;ENST00000421030;AK130047;AK301894;AK302703;AL096749;AL117640;AL832492;BC029191;BC126126;BC143891;BC143892;BC144516;NR_026782;OTTHUMT00000027345;OTTHUMT00000027347;OTTHUMT00000027348;OTTHUMT00000027349;OTTHUMT00000027350;OTTHUMT00000027428;OTTHUMT00000097387;OTTHUMT00000335565;OTTHUMT00000335566;OTTHUMT000003469…	RefSeq;RefSeq;ENSEMBL;ENSEMBL;ENSEMBL;ENSEMBL;ENSEMBL;GenBank;GenBank;GenBank;GenBank;GenBankHTC;GenBank;GenBank;GenBank;GenBank;GenBankHTC;GenBank;NONCODE;Havanatranscript;Havanatranscript;Havanatranscript;Havanatranscript;Havanatranscript;Havanatranscript;Havanatranscript;Havanatranscript;Havanatranscript;Havanatranscript;Havanatranscript;Havanatranscript;UCSCGenes;UCSCGenes;UCSCGenes;UCSCGenes…	-0.00197901
375287	TC02002424.hg.1	TC02002424.hg.1	chr2	-	152104454	152118393	90	13939	152118393	RBM43	RBM43;RBM43;RBM43;RBM43;RBM43	RBM43	NM_198557;ENST00000331426;ENST00000409092;BC136410;BC136411;OTTHUMT00000254816;OTTHUMT00000332400;uc002txh.3	RefSeq;ENSEMBL;ENSEMBL;GenBank;GenBank;Havanatranscript;Havanatranscript;UCSCGenes	-0.0101786
3772	TC21000717.hg.1	TC21000717.hg.1	chr21	+	39601885	39663669	30	61784	39601885	KCNJ15	NA	NA	Y13896	NONCODE	-0.0288511
3797	TC02001664.hg.1	TC02001664.hg.1	chr2	-	26149455	26205618	240	56163	26205618	KIF3C	KIF3C;KIF3C;KIF3C;KIF3C;KIF3C;KIF3C;KIF3C;KIF3C;KIF3C;KIF3C;KIF3C;KIF3C;KIF3C	KIF3C	NM_002254;ENST00000264712;ENST00000405914;ENST00000496378;BC018932;BC042486;BC092406;BC130423;BC144223;OTTHUMT00000211611;OTTHUMT00000325596;OTTHUMT00000325597;OTTHUMT00000325598;OTTHUMT00000325599;OTTHUMT00000325600;OTTHUMT00000325601;uc002rgu.2;uc010eyj.1;uc010ykr.1;ENST00000542511	RefSeq;ENSEMBL;ENSEMBL;ENSEMBL;GenBankHTC;GenBank;GenBank;GenBank;GenBank;Havanatranscript;Havanatranscript;Havanatranscript;Havanatranscript;Havanatranscript;Havanatranscript;Havanatranscript;UCSCGenes;UCSCGenes;UCSCGenes;ENSEMBL	-0.0102121
3800	TC02000927.hg.1	TC02000927.hg.1	chr2	+	149632792	149883273	344	250481	149632792	KIF5C	KIF5C;KIF5C;KIF5C;KIF5C;KIF5C;KIF5C;KIF5C;KIF5C;KIF5C;KIF5C;KIF5C;KIF5C;KIF5C;KIF5C	KIF5C	NM_004522;ENST00000435030;ENST00000464066;AB073396;AB209191;BC110287;OTTHUMT00000332562;OTTHUMT00000332563;OTTHUMT00000332564;OTTHUMT00000332565;OTTHUMT00000333200;uc002tws.1;uc002twt.3;uc002twu.1;uc010zbu.2;ENST00000397413;ENST00000414838	RefSeq;ENSEMBL;ENSEMBL;GenBank;GenBank;GenBank;Havanatranscript;Havanatranscript;Havanatranscript;Havanatranscript;Havanatranscript;UCSCGenes;UCSCGenes;UCSCGenes;UCSCGenes;ENSEMBL;ENSEMBL	0.038296
3801	TC16001909.hg.1	TC16001909.hg.1	chr16	-	57805549	57813452	30	7903	57813452	KIFC3	NA	NA	DQ426880	NONCODE	-0.000747191
3821	TC12003273.hg.1	TC12003273.hg.1	chr12	-	10594863	10607284	133	12421	10607284	KLRC1	KLRC1;KLRC1;KLRC1;KLRC1;KLRC1;KLRC1;KLRC1;KLRC1;KLRC1;KLRC1;KLRC1;KLRC1;KLRC1;KLRC1	KLRC1	NM_002259;NM_007328;NM_213657;NM_213658;ENST00000347831;ENST00000359151;ENST00000408006;ENST00000536188;ENST00000544822;AK310992;BC012550;BC053840;uc001qyl.3;uc001qym.3;uc001qyn.3;uc001qyo.3;uc009zhm.2	RefSeq;RefSeq;RefSeq;RefSeq;ENSEMBL;ENSEMBL;ENSEMBL;ENSEMBL;ENSEMBL;GenBankHTC;GenBank;GenBank;UCSCGenes;UCSCGenes;UCSCGenes;UCSCGenes;UCSCGenes	-0.038898
387104;9729	TC06002090.hg.1	TC06002090.hg.1	chr6	-	127759551	127840500	439	80949	127840500	SOGA3;KIAA0408	SOGA3;SOGA3;KIAA0408;SOGA3;KIAA0408;SOGA3;SOGA3;KIAA0408;KIAA0408;KIAA0408;;SOGA3;KIAA0408;SOGA3;;SOGA3;KIAA0408;;KIAA0408;;;KIAA0408	SOGA3;KIAA0408	NM_001012279;NM_014702;ENST00000481848;ENST00000483725;ENST00000556132;AB007868;AK125983;AK127114;BC018396;OTTHUMT00000042139;OTTHUMT00000042140;OTTHUMT00000042145;OTTHUMT00000042146;OTTHUMT00000042148;OTTHUMT00000042150;uc003qba.3;uc003qbb.3;uc003qbc.3;uc003qbd.3;uc011ebs.2;ENST00000368268;ENST00000465909;ENST00000525778;OTTHUMT00000042141;OTTHUMT00000042142;OTTHUMT00000042147;OTTHUMT00000042149	RefSeq;RefSeq;ENSEMBL;ENSEMBL;ENSEMBL;GenBank;GenBank;GenBank;GenBank;Havanatranscript;Havanatranscript;Havanatranscript;Havanatranscript;Havanatranscript;Havanatranscript;UCSCGenes;UCSCGenes;UCSCGenes;UCSCGenes;UCSCGenes;ENSEMBL;ENSEMBL;ENSEMBL;Havanatranscript;Havanatranscript;Havanatranscript;Havanatranscript	0.0181646
387712	TC10000848.hg.1	TC10000848.hg.1	chr10	+	118609023	118671297	190	62274	118609023	ENO4	ENO4;ENO4;ENO4;ENO4;ENO4;ENO4;ENO4;ENO4;ENO4;ENO4	ENO4	NM_001242699;ENST00000341276;ENST00000369207;ENST00000409522;ENST00000512864;BX647301;OTTHUMT00000050551;OTTHUMT00000050552;OTTHUMT00000331643;uc001lcw.3;uc021pzj.1	RefSeq;ENSEMBL;ENSEMBL;ENSEMBL;ENSEMBL;GenBank;Havanatranscript;Havanatranscript;Havanatranscript;UCSCGenes;UCSCGenes	-0.0174113
388323	TC17002020.hg.1	TC17002020.hg.1	chr17	+	4692842	4693628	30	786	4692842	GLTPD2	NA	NA	BC127703	NONCODE	0.00307987
389170	TC03000855.hg.1	TC03000855.hg.1	chr3	+	156544076	156545449	30	1373	156544076	LEKR1	AK094480	AK094480	AK094480;uc003faz.1	GenBank;UCSCGenes	0.0100141
389493	TC07003358.hg.1	TC07003358.hg.1	chr7	-	56182374	56184093	20	1719	56184093	NUPR2	NUPR1L;NUPR1L;NUPR1L	NUPR1L	NM_001145712;ENST00000329309;OTTHUMT00000343551;uc003tsb.3	RefSeq;ENSEMBL;Havanatranscript;UCSCGenes	0.00289235
389690	TC08001696.hg.1	TC08001696.hg.1	chr8	-	142443929	142517330	360	73401	142517330	MROH5	MROH5;MROH5;MROH5	MROH5	NM_207414;ENST00000430863;AK131461;BC144560;uc003ywi.2;uc010meu.1;uc011ljs.1	RefSeq;ENSEMBL;GenBank;GenBank;UCSCGenes;UCSCGenes;UCSCGenes	-0.00298411
390113	TC11000415.hg.1	TC11000415.hg.1	chr11	+	48285413	48286330	30	917	48285413	OR4X1	OR4X1;OR4X1;OR4X1	OR4X1	NM_001004726;uc010rht.2;ENST00000320048	RefSeq;UCSCGenes;ENSEMBL	0.00843252
3903	TC19001844.hg.1	TC19001844.hg.1	chr19	-	54865235	54882165	377	16930	54882165	LAIR1	LAIR1;LAIR1;LAIR1;LAIR1;LAIR1;LAIR1;LAIR1;LAIR1;LAIR1;LAIR1;LAIR1;LAIR1;LAIR1;LAIR1;LAIR1;LAIR1;LAIR1;LAIR1;LAIR1;LAIR1;LAIR1;LAIR1;LAIR1;LAIR1;LAIR1;LAIR1;LAIR1;LAIR1;LAIR1;LAIR1;LAIR1;LAIR1;LAIR1;LAIR1;LAIR1;LAIR1;LAIR1	LAIR1	NM_002287;NM_021706;ENST00000313038;ENST00000348231;ENST00000391742;ENST00000391743;ENST00000434277;ENST00000463489;ENST00000474878;AF251509;AK097869;AK290415;AK303261;BC027899;OTTHUMT00000140506;OTTHUMT00000140507;OTTHUMT00000140508;OTTHUMT00000140509;OTTHUMT00000140510;OTTHUMT00000140511;OTTHUMT00000140512;OTTHUMT00000140514;OTTHUMT00000140515;OTTHUMT00000140516;OTTHUMT00000140517;OTTHUMT000001…	RefSeq;RefSeq;ENSEMBL;ENSEMBL;ENSEMBL;ENSEMBL;ENSEMBL;ENSEMBL;ENSEMBL;GenBank;GenBank;GenBank;GenBank;GenBank;Havanatranscript;Havanatranscript;Havanatranscript;Havanatranscript;Havanatranscript;Havanatranscript;Havanatranscript;Havanatranscript;Havanatranscript;Havanatranscript;Havanatranscript;Havanatranscript;Havanatranscript;Havanatranscript;Havanatranscript;Havanatranscript;Havanatranscript;…	0.031869
390433	TC14000874.hg.1	TC14000874.hg.1	chr14	-	20502003	20502919	30	916	20502919	OR4K13	OR4K13;OR4K13;OR4K13	OR4K13	NM_001004714;ENST00000315693;uc010tkz.2	RefSeq;ENSEMBL;UCSCGenes	-0.0120313
390756	TC17002015.hg.1	TC17002015.hg.1	chr17	+	3213280	3214740	50	1460	3213280	OR3A4P	OR3A4P	OR3A4P	AJ459867;NR_024128;U04680	NONCODE;NONCODE;NONCODE	0.00807977
390940	TC19002153.hg.1	TC19002153.hg.1	chr19	+	44084790	44088106	28	3316	44084790	PINLYP	PINLYP	PINLYP	ENST00000413422	NONCODE	-0.00184497
3991	TC19001573.hg.1	TC19001573.hg.1	chr19	-	42905659	42931578	110	25919	42931578	LIPE	LIPE;LIPE;LIPE;LIPE	LIPE	NM_005357;ENST00000244289;BC029301;BC070041;uc002otr.3;uc002ots.1	RefSeq;ENSEMBL;GenBankHTC;GenBank;UCSCGenes;UCSCGenes	0.000715723
399670	TC07000501.hg.1	TC07000501.hg.1	chr7	+	77976459	77988775	70	12316	77976459	RPL13AP17	RPL13AP17;RPL13AP17;RPL13AP17	RPL13AP17	NR_003680;ENST00000450028;uc010ldz.3;uc010ldz.2	RefSeq;ENSEMBL;UCSCGenes;NONCODE	0.000140717
399886	TC11000381.hg.1	TC11000381.hg.1	chr11	+	45392948	45410059	60	17111	45392948	LOC399886	;FLJ41423	FLJ41423	ENST00000528390;AK123417;BC130636;uc001myr.1	ENSEMBL;GenBank;GenBank;UCSCGenes	-0.000233676
400128	TC13000621.hg.1	TC13000621.hg.1	chr13	-	44974386	44980021	30	5635	44980021	TUSC8	BC025370;LINC01071;LINC01071;LINC01071	BC025370;LINC01071	BC025370;BC025370;ENST00000432701;ENST00000432701;OTTHUMT00000044739;uc001uzl.3	NONCODE;GenBank;ENSEMBL;NONCODE;NONCODE;UCSCGenes	-0.00468279
400578	TC17002518.hg.1	TC17002518.hg.1	chr17	-	16733797	16736147	50	2350	16736147	KRT16P2	KRT16P2	KRT16P2	NR_029392	NONCODE	0.00828183
400798	TC01006409.hg.1	TC01006409.hg.1	chr1	+	178511887	178518024	110	6137	178511887	C1orf220	C1orf220;C1orf220;;C1orf220;C1orf220;C1orf220;C1orf220;C1orf220;C1orf220	C1orf220	NR_033186;ENST00000367638;ENST00000521244;BC136727;NR_033186;OTTHUMT00000084932;OTTHUMT00000098176;uc001glx.1;ENST00000319387;ENST00000367636	RefSeq;ENSEMBL;ENSEMBL;GenBank;NONCODE;Havanatranscript;Havanatranscript;UCSCGenes;ENSEMBL;ENSEMBL	-0.0029347
401081	TC03002458.hg.1	TC03002458.hg.1	chr3	+	108855561	108868951	24	13390	108855561	FLJ22763			NR_033977	NONCODE	-0.0070864
401082	TC03000556.hg.1	TC03000556.hg.1	chr3	+	109128837	109214014	70	85177	109128837	LINC01205	FLJ25363;;;	FLJ25363	NM_001145553;ENST00000489670;ENST00000497996;OTTHUMT00000353891;OTTHUMT00000353892;uc003dxr.1	RefSeq;ENSEMBL;ENSEMBL;Havanatranscript;Havanatranscript;UCSCGenes	-0.00471315
401207	TC05001747.hg.1	TC05001747.hg.1	chr5	-	126378250	126409184	76	30934	126409184	C5orf63	C5orf63;C5orf63;C5orf63;C5orf63;C5orf63;C5orf63;C5orf63;C5orf63	C5orf63	NM_001164478;NM_001164479;ENST00000296662;ENST00000508527;ENST00000535381;AK126569;uc003kug.2;uc021ydb.1;uc021ydc.1;uc003kug.1	RefSeq;RefSeq;ENSEMBL;ENSEMBL;ENSEMBL;GenBank;UCSCGenes;UCSCGenes;UCSCGenes;NONCODE	-0.00480175
401237	TC06000136.hg.1	TC06000136.hg.1	chr6	+	21665003	22214734	260	549731	21665003	CASC15	CASC15;CASC15;CASC15;LINC00340;LINC00340;LINC00340;LINC00340;LINC00340;LINC00340;LINC00340;LINC00340;LINC00340;LINC00340	CASC15;LINC00340	NR_015410;ENST00000444265;AK022865;AK094718;AK096633;AK300802;AK310212;BC044235;BC044235;OTTHUMT00000039992;uc003ndj.2;uc003ndj.3;uc003ndk.1;uc003ndk.1;uc003ndl.2;uc003ndl.3;uc003ndn.3;uc010jpp.1;uc010jpp.1;uc011djj.1;uc011djj.1;uc011djk.1;uc011djk.2	RefSeq;ENSEMBL;GenBank;GenBank;GenBank;GenBank;GenBankHTC;NONCODE;GenBank;NONCODE;NONCODE;UCSCGenes;UCSCGenes;NONCODE;NONCODE;UCSCGenes;UCSCGenes;UCSCGenes;NONCODE;UCSCGenes;NONCODE;NONCODE;UCSCGenes	0.00825808
401427;728377;7984	TC07003306.hg.1	TC07003306.hg.1	chr7	-	143955789	143991256	162	35467	143991256	OR2A7;ARHGEF34P;ARHGEF5	OR2A7;OR2A7;ARHGEF34P;ARHGEF34P	OR2A7;ARHGEF34P	NM_001005328;NR_033942;CR749203;NR_033942;uc003wef.3;uc011kuc.2;uc022aoi.1	RefSeq;RefSeq;GenBankHTC;NONCODE;UCSCGenes;UCSCGenes;UCSCGenes	0.00200593
401474	TC08001551.hg.1	TC08001551.hg.1	chr8	-	119201694	119634234	140	432540	119634234	SAMD12	SAMD12;SAMD12;SAMD12;SAMD12;SAMD12;SAMD12;SAMD12;SAMD12;SAMD12;SAMD12;SAMD12	SAMD12	NM_001101676;NM_207506;ENST00000314727;ENST00000409003;ENST00000527515;AK311704;BC121818;OTTHUMT00000132989;OTTHUMT00000143864;OTTHUMT00000330658;uc003yom.2;uc010mda.1;uc010mdb.1;OTTHUMT00000132987	RefSeq;RefSeq;ENSEMBL;ENSEMBL;ENSEMBL;GenBankHTC;GenBank;Havanatranscript;Havanatranscript;Havanatranscript;UCSCGenes;UCSCGenes;UCSCGenes;Havanatranscript	0.020628
401492	TC09002407.hg.1	TC09002407.hg.1	chr9	-	13406379	13431328	30	24949	13431328	LINC01235			NR_033863	NONCODE	0.00339147
401509	TC09002500.hg.1	TC09002500.hg.1	chr9	-	39443814	39464526	60	20712	39464526	ZNF658B	;		NR_003528;NR_027861	NONCODE;NONCODE	-0.00873417
401509;26149	TC09001095.hg.1	TC09001095.hg.1	chr9	-	39415985	39508888	150	92903	39508888	ZNF658B;ZNF658	;;ZNF658B;LOC653501;;LOC653501	ZNF658B;LOC653501	NR_003528;BC031626;BC137089;NR_003528;NR_027861;uc004abn.3;uc004abo.4;uc010mmh.3	RefSeq;GenBank;GenBank;NONCODE;NONCODE;UCSCGenes;UCSCGenes;UCSCGenes	-0.0170311
402055	TC22000170.hg.1	TC22000170.hg.1	chr22	+	26879843	26887904	110	8061	26879843	SRRD	SRRD;SRRD;SRRD;SRRD;SRRD;SRRD	SRRD	NM_001013694;ENST00000215917;AK293916;BC066962;OTTHUMT00000320423;OTTHUMT00000320424;OTTHUMT00000322345;uc003acp.4;uc010gve.3	RefSeq;ENSEMBL;GenBank;GenBank;Havanatranscript;Havanatranscript;Havanatranscript;UCSCGenes;UCSCGenes	0.00421316
402381	TC09001719.hg.1	TC09001719.hg.1	chr9	-	138585253	138591374	90	6121	138591374	SOHLH1	SOHLH1;SOHLH1;SOHLH1;SOHLH1;SOHLH1;SOHLH1;SOHLH1	SOHLH1	NM_001012415;NM_001101677;ENST00000298466;ENST00000425225;BC031861;OTTHUMT00000055018;uc004cgl.3;uc010nbe.3	RefSeq;RefSeq;ENSEMBL;ENSEMBL;GenBank;Havanatranscript;UCSCGenes;UCSCGenes	0.0101504
4041	TC11000707.hg.1	TC11000707.hg.1	chr11	+	68080077	68216743	278	136666	68080077	LRP5	LRP5;LRP5;LRP5;LRP5	LRP5	NM_002335;ENST00000294304;ENST00000529481;BC098397;BC150595;uc001ont.3;uc009ysg.3	RefSeq;ENSEMBL;ENSEMBL;GenBank;GenBank;UCSCGenes;UCSCGenes	-0.0243573
4057	TC03001357.hg.1	TC03001357.hg.1	chr3	-	46477136	46526724	330	49588	46526724	LTF	LTF;LTF;LTF;LTF;LTF;LTF;LTF;LTF;LTF;LTF;LTF;LTF;LTF;LTF;LTF;LTF;LTF;LTF;LTF	LTF	NM_001199149;NM_002343;ENST00000231751;ENST00000417439;ENST00000426532;ENST00000493056;AK093852;AY360320;BC015822;BC015823;BC022347;OTTHUMT00000343951;OTTHUMT00000343952;OTTHUMT00000343953;OTTHUMT00000343954;OTTHUMT00000343955;OTTHUMT00000343967;OTTHUMT00000343968;OTTHUMT00000343969;uc003cpq.3;uc003cpr.3;uc003fzr.3;uc010hjh.3;ENST00000443743;OTTHUMT00000343956	RefSeq;RefSeq;ENSEMBL;ENSEMBL;ENSEMBL;ENSEMBL;GenBank;GenBank;GenBank;GenBank;GenBank;Havanatranscript;Havanatranscript;Havanatranscript;Havanatranscript;Havanatranscript;Havanatranscript;Havanatranscript;Havanatranscript;UCSCGenes;UCSCGenes;UCSCGenes;UCSCGenes;ENSEMBL;Havanatranscript	0.00842151
407738	TC03000412.hg.1	TC03000412.hg.1	chr3	+	68040734	68594776	130	554042	68040734	FAM19A1	FAM19A1;FAM19A1;FAM19A1;FAM19A1;FAM19A1;FAM19A1;FAM19A1;FAM19A1;FAM19A1;FAM19A1	FAM19A1	NM_001252216;NM_213609;ENST00000478136;ENST00000491017;ENST00000496687;AL713702;BC025746;OTTHUMT00000352004;OTTHUMT00000352005;OTTHUMT00000352006;uc003dnd.3;uc003dne.3;uc003dng.3	RefSeq;RefSeq;ENSEMBL;ENSEMBL;ENSEMBL;GenBankHTC;GenBank;Havanatranscript;Havanatranscript;Havanatranscript;UCSCGenes;UCSCGenes;UCSCGenes	0.00560285
414208	TC10000280.hg.1	TC10000280.hg.1	chr10	+	44141390	44143467	30	2077	44141390	ZNF32-AS2	ZNF32-AS2;ZNF32-AS2	ZNF32-AS2	ENST00000418966;OTTHUMT00000047718	ENSEMBL;Havanatranscript	0.00339994
4160	TC18000550.hg.1	TC18000550.hg.1	chr18	-	58038343	58040008	40	1665	58040008	MC4R	MC4R;MC4R;MC4R	MC4R	NM_005912;ENST00000299766;BC069172;BC101802;OTTHUMT00000256139;uc002lie.1	RefSeq;ENSEMBL;GenBank;GenBank;Havanatranscript;UCSCGenes	0.0112307
420	TC12002776.hg.1	TC12002776.hg.1	chr12	-	14982237	14993450	30	11213	14993450	ART4	NA	NA	AY690666;AY829436	NONCODE;NONCODE	0.0126033
4301	TC06001184.hg.1	TC06001184.hg.1	chr6	+	168227602	168372703	697	145101	168227602	MLLT4	MLLT4;MLLT4;MLLT4;MLLT4;MLLT4;MLLT4;MLLT4;MLLT4;MLLT4;MLLT4;MLLT4;MLLT4;MLL/AF6 fusion;MLLT4;MLLT4;MLLT4;MLLT4;MLLT4;MLLT4;MLLT4;MLLT4;MLLT4;MLLT4;MLLT4;MLLT4;MLLT4;MLLT4;MLLT4;MLLT4;MLLT4;MLLT4;MLLT4;MLLT4;MLLT4;MLLT4;MLLT4;BX649158;MLLT4;MLLT4	MLLT4;MLL/AF6 fusion;BX649158	NM_001040000;NM_001207008;ENST00000344191;ENST00000351017;ENST00000366806;ENST00000392108;ENST00000392112;ENST00000400822;ENST00000447894;ENST00000507679;AB621809;AL161973;BC014505;BX649158;DQ387206;OTTHUMT00000043148;OTTHUMT00000043149;OTTHUMT00000043150;OTTHUMT00000043151;OTTHUMT00000043152;OTTHUMT00000043153;OTTHUMT00000043154;OTTHUMT00000043155;OTTHUMT00000043156;OTTHUMT00000043157;OTTHUMT000…	RefSeq;RefSeq;ENSEMBL;ENSEMBL;ENSEMBL;ENSEMBL;ENSEMBL;ENSEMBL;ENSEMBL;ENSEMBL;GenBank;GenBank;GenBank;GenBank;GenBank;Havanatranscript;Havanatranscript;Havanatranscript;Havanatranscript;Havanatranscript;Havanatranscript;Havanatranscript;Havanatranscript;Havanatranscript;Havanatranscript;Havanatranscript;Havanatranscript;Havanatranscript;Havanatranscript;Havanatranscript;Havanatranscript;Havanatra…	0.00337394
4313	TC16000454.hg.1	TC16000454.hg.1	chr16	+	55512883	55540603	190	27720	55512883	MMP2	MMP2;MMP2;MMP2;MMP2;MMP2;MMP2;MMP2;MMP2;MMP2	MMP2	NM_001127891;NM_004530;ENST00000219070;ENST00000437642;ENST00000543485;AK301536;BC002576;OTTHUMT00000256913;uc002ehz.4;uc010ccc.3;uc010vhd.2	RefSeq;RefSeq;ENSEMBL;ENSEMBL;ENSEMBL;GenBank;GenBank;Havanatranscript;UCSCGenes;UCSCGenes;UCSCGenes	-0.0112342
440051	TC11002040.hg.1	TC11002040.hg.1	chr11	-	71292901	71318487	70	25586	71318487	KRTAP5-11	KRTAP5-11;KRTAP5-11;;KRTAP5-11;KRTAP5-11	KRTAP5-11	NM_001005405;ENST00000398530;ENST00000526239;OTTHUMT00000127969;uc001oqu.3;ENST00000343767	RefSeq;ENSEMBL;ENSEMBL;Havanatranscript;UCSCGenes;ENSEMBL	0.00422886
440107	TC12000714.hg.1	TC12000714.hg.1	chr12	+	93115281	93166231	207	50950	93115281	PLEKHG7	PLEKHG7;PLEKHG7;PLEKHG7;PLEKHG7	PLEKHG7	NM_001004330;ENST00000344636;ENST00000549856;BC137086;uc001tcj.2	RefSeq;ENSEMBL;ENSEMBL;GenBank;UCSCGenes	-0.0165766
440699	TC01001440.hg.1	TC01001440.hg.1	chr1	+	165513244	165533198	44	19954	165513244	LRRC52	LRRC52;LRRC52;LRRC52	LRRC52	NM_001005214;ENST00000294818;BC132981;OTTHUMT00000083793;uc001gde.2	RefSeq;ENSEMBL;GenBank;Havanatranscript;UCSCGenes	-0.00163132
440862	TC02004216.hg.1	TC02004216.hg.1	chr2	-	46755018	46768722	40	13704	46768722	LOC440862	NA	NA	AF086285	NONCODE	0.00122508
440894;151009	TC02000674.hg.1	TC02000674.hg.1	chr2	+	110744557	110753809	90	9252	110744557	LINC01123;LINC01106	LINC01123;LINC01123;LINC01123;LINC01123;LINC01123	LINC01123	NR_046110;NR_046111;NR_046112;ENST00000419296;AK056084;BC113052;ENST00000419296;OTTHUMT00000337799;OTTHUMT00000337869;uc002tfi.3;uc002tfi.3;uc002tfj.3;uc002tfj.3	RefSeq;RefSeq;RefSeq;ENSEMBL;GenBank;GenBank;NONCODE;Havanatranscript;Havanatranscript;UCSCGenes;NONCODE;UCSCGenes;NONCODE	0.00779636
441459	TC09000143.hg.1	TC09000143.hg.1	chr9	+	33524392	33573007	250	48615	33524392	ANKRD18B	ANKRD18B;ANKRD18B;ANKRD18B;ANKRD18B;ANKRD18B;ANKRD18B;ANKRD18B;ANKRD18B;ANKRD18B;ANKRD18B	ANKRD18B	NM_001244752;ENST00000290943;ENST00000426460;OTTHUMT00000052084;OTTHUMT00000313729;OTTHUMT00000313730;OTTHUMT00000314913;OTTHUMT00000314914;OTTHUMT00000314915;OTTHUMT00000314916;uc010mjw.2	RefSeq;ENSEMBL;ENSEMBL;Havanatranscript;Havanatranscript;Havanatranscript;Havanatranscript;Havanatranscript;Havanatranscript;Havanatranscript;UCSCGenes	0.00786256
442184	TC06001481.hg.1	TC06001481.hg.1	chr6	-	29053985	29055090	30	1105	29055090	OR2B3	OR2B3;OR2B3;OR2B3	OR2B3	NM_001005226;ENST00000377173;OTTHUMT00000076469;uc003nlx.3	RefSeq;ENSEMBL;Havanatranscript;UCSCGenes	-0.0105746
442211	TC06000583.hg.1	TC06000583.hg.1	chr6	+	42695314	42695932	30	618	42695314	ATP6V0CP3	ATP6V0CP3	ATP6V0CP3	NR_037141;NR_037141;uc021yzo.1	RefSeq;NONCODE;UCSCGenes	0.00101464
445329	TC16001486.hg.1	TC16001486.hg.1	chr16	+	30214329	30214825	30	496	30214329	SULT1A4	NA	NA	L19957	NONCODE	-0.00734644
448831	TC04001840.hg.1	TC04001840.hg.1	chr4	-	190945506	190948412	50	2906	190948412	FRG2	LOC100288255;FRG2;FRG2;FRG2;FRG2;FRG2;LOC100288255	LOC100288255;FRG2	NM_001005217;ENST00000378763;ENST00000504750;BC144572;OTTHUMT00000360294;OTTHUMT00000360307;NM_001199232;uc003izv.3;uc011clh.2	RefSeq;ENSEMBL;ENSEMBL;GenBank;Havanatranscript;Havanatranscript;RefSeq;UCSCGenes;UCSCGenes	-0.00278174
4646	TC06002880.hg.1	TC06002880.hg.1	chr6	+	76542604	76550975	40	8371	76542604	MYO6	NA	NA	L29145	NONCODE	0.0209344
4703	TC02002428.hg.1	TC02002428.hg.1	chr2	-	152341850	152591001	2094	249151	152591001	NEB	NEB;NEB;NEB;NEB;NEB;NEB;NEB;NEB;NEB;NEB;NEB;NEB;NEB;NEB;NEB;NEB;NEB;NEB;NEB;NEB;NEB;NEB;NEB;NEB;NEB;NEB;NEB;NEB;NEB;NEB;NEB;NEB;NEB;NEB;NEB;NEB	NEB	NM_001164507;NM_001164508;NM_004543;ENST00000172853;ENST00000397345;ENST00000409198;ENST00000427231;ENST00000498015;AK300079;AK300674;AK300722;BC050436;BC063136;BX648963;OTTHUMT00000332406;OTTHUMT00000333620;OTTHUMT00000333621;OTTHUMT00000333622;OTTHUMT00000333624;OTTHUMT00000333650;OTTHUMT00000333651;OTTHUMT00000333652;OTTHUMT00000333753;OTTHUMT00000333754;OTTHUMT00000333755;OTTHUMT00000333756;O…	RefSeq;RefSeq;RefSeq;ENSEMBL;ENSEMBL;ENSEMBL;ENSEMBL;ENSEMBL;GenBank;GenBank;GenBank;GenBank;GenBank;GenBank;Havanatranscript;Havanatranscript;Havanatranscript;Havanatranscript;Havanatranscript;Havanatranscript;Havanatranscript;Havanatranscript;Havanatranscript;Havanatranscript;Havanatranscript;Havanatranscript;Havanatranscript;Havanatranscript;GenBank;UCSCGenes;UCSCGenes;UCSCGenes;UCSCGenes;UCSC…	-0.0050609
4756	TC15000664.hg.1	TC15000664.hg.1	chr15	+	73344051	73597547	379	253496	73344051	NEO1	NEO1;NEO1;NEO1;NEO1;NEO1;NEO1;NEO1;NEO1;NEO1;NEO1;NEO1;NEO1;NEO1;NEO1;NEO1	NEO1	NM_001172623;NM_001172624;NM_002499;ENST00000261908;ENST00000339362;ENST00000558964;ENST00000560262;ENST00000560328;ENST00000560352;BC117161;BC143270;BC143271;BC143279;OTTHUMT00000257472;uc002avm.4;uc010ukx.2;uc010uky.2;uc010ukz.2;ENST00000379842;uc002avn.4	RefSeq;RefSeq;RefSeq;ENSEMBL;ENSEMBL;ENSEMBL;ENSEMBL;ENSEMBL;ENSEMBL;GenBank;GenBank;GenBank;GenBankHTC;Havanatranscript;UCSCGenes;UCSCGenes;UCSCGenes;UCSCGenes;ENSEMBL;UCSCGenes	0.0214874
481	TC01001473.hg.1	TC01001473.hg.1	chr1	+	169074935	169101960	170	27025	169074935	ATP1B1	ATP1B1;ATP1B1;ATP1B1;ATP1B1;ATP1B1;ATP1B1;ATP1B1;ATP1B1;ATP1B1;ATP1B1	ATP1B1	NM_001677;ENST00000367815;ENST00000367816;ENST00000494797;BC000006;OTTHUMT00000083695;OTTHUMT00000083696;OTTHUMT00000083697;uc001gfr.1;ENST00000367813;ENST00000499679	RefSeq;ENSEMBL;ENSEMBL;ENSEMBL;GenBank;Havanatranscript;Havanatranscript;Havanatranscript;UCSCGenes;ENSEMBL;ENSEMBL	0.00514534
482	TC17000108.hg.1	TC17000108.hg.1	chr17	+	7554254	7561089	100	6835	7554254	ATP1B2	ATP1B2;ATP1B2;ATP1B2	ATP1B2	NM_001678;ENST00000250111;BC126175;uc002gif.1	RefSeq;ENSEMBL;GenBank;UCSCGenes	0.0146542
482	TC17002040.hg.1	TC17002040.hg.1	chr17	+	7560035	7561086	30	1051	7560035	ATP1B2	NA	NA	BC035801	NONCODE	0.00811211
4825	TC04001354.hg.1	TC04001354.hg.1	chr4	-	85413061	85420231	90	7170	85420231	NKX6-1	NKX6-1;NKX6-1;NKX6-1;NKX6-1	NKX6-1	NM_006168;ENST00000295886;OTTHUMT00000252814;OTTHUMT00000362850;uc003hpa.1	RefSeq;ENSEMBL;Havanatranscript;Havanatranscript;UCSCGenes	0.011686
4843	TC17002562.hg.1	TC17002562.hg.1	chr17	-	26101341	26105950	30	4609	26105950	NOS2	NA	NA	S75615	NONCODE	-0.00817389
4852	TC07000153.hg.1	TC07000153.hg.1	chr7	+	24323782	24331484	72	7702	24323782	NPY	NPY;NPY;NPY;NPY;NPY;NPY;NPY	NPY	NM_000905;ENST00000242152;ENST00000405982;ENST00000407573;BC029497;OTTHUMT00000214041;OTTHUMT00000326747;OTTHUMT00000326748;uc003sww.2	RefSeq;ENSEMBL;ENSEMBL;ENSEMBL;GenBank;Havanatranscript;Havanatranscript;Havanatranscript;UCSCGenes	0.00543142
4860	TC14000056.hg.1	TC14000056.hg.1	chr14	+	20937538	20946165	130	8627	20937538	PNP	PNP;PNP;PNP;PNP;PNP;PNP	PNP	NM_000270;ENST00000361505;AK098544;AK307340;AK307364;BC104206;BC106074;OTTHUMT00000073646;uc001vxo.4;uc010ahm.2;uc010ahn.3;uc021rns.1	RefSeq;ENSEMBL;GenBank;GenBankHTC;GenBankHTC;GenBank;GenBank;Havanatranscript;UCSCGenes;UCSCGenes;UCSCGenes;UCSCGenes	0.0164247
4882	TC09000195.hg.1	TC09000195.hg.1	chr9	+	35792151	35809729	290	17578	35792151	NPR2	NPR2;NPR2;NPR2;NPR2;NPR2;NPR2;NPR2;NPR2;NPR2	NPR2	NM_003995;ENST00000342694;OTTHUMT00000052345;OTTHUMT00000052346;OTTHUMT00000052347;OTTHUMT00000052348;OTTHUMT00000346409;OTTHUMT00000346410;uc003zyd.3;BC096341;uc010mlb.3	RefSeq;ENSEMBL;Havanatranscript;Havanatranscript;Havanatranscript;Havanatranscript;Havanatranscript;Havanatranscript;UCSCGenes;GenBank;UCSCGenes	-0.0417699
4913	TC16000772.hg.1	TC16000772.hg.1	chr16	-	2089816	2097867	70	8051	2097867	NTHL1	NTHL1;NTHL1;NTHL1	NTHL1	NM_002528;ENST00000219066;BC003014;OTTHUMT00000250656;uc002col.1	RefSeq;ENSEMBL;GenBank;Havanatranscript;UCSCGenes	-0.00829499
4958	TC09001335.hg.1	TC09001335.hg.1	chr9	-	95176527	95186836	50	10309	95186836	OMD	OMD;OMD;OMD	OMD	NM_005014;ENST00000375550;BC046356;OTTHUMT00000053090;uc004asd.4	RefSeq;ENSEMBL;GenBank;Havanatranscript;UCSCGenes	0.000685781
497049	TC19002309.hg.1	TC19002309.hg.1	chr19	-	7004964	7006426	30	1462	7006426	FLJ25758	FLJ25758	FLJ25758	uc002mfy.2	NONCODE	-0.0136648
4992	TC16000117.hg.1	TC16000117.hg.1	chr16	+	3254247	3255188	30	941	3254247	OR1F1	OR1F1;OR1F1;OR1F1	OR1F1	NM_012360;ENST00000304646;BC069335;OTTHUMT00000206985;uc010uwu.2	RefSeq;ENSEMBL;GenBank;Havanatranscript;UCSCGenes	-0.00517006
5021	TC03001145.hg.1	TC03001145.hg.1	chr3	-	8792094	8811314	90	19220	8811314	OXTR	OXTR;OXTR;OXTR;OXTR;OXTR;OXTR	OXTR	NM_000916;ENST00000316793;BC137443;OTTHUMT00000207061;OTTHUMT00000314040;OTTHUMT00000314041;OTTHUMT00000314042;uc003brc.3	RefSeq;ENSEMBL;GenBank;Havanatranscript;Havanatranscript;Havanatranscript;Havanatranscript;UCSCGenes	-8e-05
5028	TC03000835.hg.1	TC03000835.hg.1	chr3	+	152552482	152555843	40	3361	152552482	P2RY1	P2RY1;P2RY1;P2RY1	P2RY1	NM_002563;ENST00000305097;BC074784;OTTHUMT00000356943;uc003ezq.3	RefSeq;ENSEMBL;GenBank;Havanatranscript;UCSCGenes	-0.00647171
5069	TC09002210.hg.1	TC09002210.hg.1	chr9	+	118935545	118937821	30	2276	118935545	PAPPA	NA	NA	AK129714	NONCODE	-0.00789902
50939	TC03001613.hg.1	TC03001613.hg.1	chr3	-	100941390	101039442	245	98052	101039442	IMPG2	IMPG2;IMPG2;IMPG2;IMPG2;IMPG2;IMPG2	IMPG2	NM_016247;ENST00000193391;AF319972;BC144092;DQ980602;DQ980602;OTTHUMT00000353256;uc003duq.2;uc010hpj.1;uc011bhe.2;uc021xbv.1;ENST00000417518	RefSeq;ENSEMBL;GenBank;GenBankHTC;NONCODE;GenBank;Havanatranscript;UCSCGenes;UCSCGenes;UCSCGenes;UCSCGenes;ENSEMBL	-0.00528513
51022	TC01003652.hg.1	TC01003652.hg.1	chr1	-	193065595	193075244	97	9649	193075244	GLRX2	GLRX2;GLRX2;GLRX2;GLRX2;GLRX2;GLRX2;GLRX2;GLRX2;GLRX2;GLRX2;GLRX2;GLRX2	GLRX2	NM_001243399;NM_016066;NM_197962;ENST00000367439;ENST00000367440;ENST00000472197;BC028113;OTTHUMT00000086699;OTTHUMT00000086700;OTTHUMT00000086701;uc001gsz.2;uc001gta.2;uc021pgp.1	RefSeq;RefSeq;RefSeq;ENSEMBL;ENSEMBL;ENSEMBL;GenBank;Havanatranscript;Havanatranscript;Havanatranscript;UCSCGenes;UCSCGenes;UCSCGenes	0.00773881
51162	TC09002355.hg.1	TC09002355.hg.1	chr9	+	139557379	139567130	100	9751	139557379	EGFL7	EGFL7	EGFL7	NR_045110	NONCODE	0.000730413
51205	TC01003128.hg.1	TC01003128.hg.1	chr1	-	147119168	147142634	200	23466	147142634	ACP6	ACP6;ACP6;ACP6;ACP6;ACP6;ACP6;ACP6;ACP6;ACP6;ACP6	ACP6	NM_016361;ENST00000392988;ENST00000460583;AK308593;BC009965;BC034686;OTTHUMT00000039420;OTTHUMT00000039421;OTTHUMT00000100082;OTTHUMT00000100083;uc001epr.2;uc009wjj.1;ENST00000369238	RefSeq;ENSEMBL;ENSEMBL;GenBankHTC;GenBank;GenBank;Havanatranscript;Havanatranscript;Havanatranscript;Havanatranscript;UCSCGenes;UCSCGenes;ENSEMBL	-0.00529878
5129	TC01004969.hg.1	TC01004969.hg.1	chr1	+	205473788	205492814	30	19026	205473788	CDK18	NA	NA	AY353240	NONCODE	-0.000838666
51316	TC04001344.hg.1	TC04001344.hg.1	chr4	-	84011201	84058228	165	47027	84058228	PLAC8	PLAC8;PLAC8;PLAC8;PLAC8;PLAC8;PLAC8;PLAC8;PLAC8;PLAC8;PLAC8;PLAC8;PLAC8;PLAC8;PLAC8;PLAC8;PLAC8;PLAC8;PLAC8;PLAC8;PLAC8	PLAC8	NM_001130715;NM_001130716;NM_016619;ENST00000311507;ENST00000411416;ENST00000426923;ENST00000505406;ENST00000509973;ENST00000515389;BC012205;EU570985;EU570986;OTTHUMT00000252637;OTTHUMT00000363077;OTTHUMT00000363078;OTTHUMT00000363079;OTTHUMT00000363080;OTTHUMT00000363081;uc003hod.2;uc003hoe.3;uc010ijy.3;uc010ijz.3;uc011cco.2	RefSeq;RefSeq;RefSeq;ENSEMBL;ENSEMBL;ENSEMBL;ENSEMBL;ENSEMBL;ENSEMBL;GenBank;GenBank;GenBank;Havanatranscript;Havanatranscript;Havanatranscript;Havanatranscript;Havanatranscript;Havanatranscript;UCSCGenes;UCSCGenes;UCSCGenes;UCSCGenes;UCSCGenes	-0.0162891
51460	TC03001464.hg.1	TC03001464.hg.1	chr3	-	52937583	53080766	335	143183	53080766	SFMBT1	SFMBT1;SFMBT1;SFMBT1;SFMBT1;SFMBT1;SFMBT1;SFMBT1;SFMBT1;SFMBT1;SFMBT1;SFMBT1;SFMBT1;SFMBT1;SFMBT1;SFMBT1	SFMBT1	NM_001005158;NM_001005159;NM_016329;ENST00000394752;ENST00000470575;AL080140;BC014614;OTTHUMT00000353040;OTTHUMT00000353041;OTTHUMT00000353042;OTTHUMT00000353090;OTTHUMT00000353091;OTTHUMT00000353092;OTTHUMT00000353105;OTTHUMT00000353177;uc003dgh.3;uc010hmr.3;ENST00000296295;ENST00000358080;uc003dgf.3;uc003dgg.3	RefSeq;RefSeq;RefSeq;ENSEMBL;ENSEMBL;GenBankHTC;GenBank;Havanatranscript;Havanatranscript;Havanatranscript;Havanatranscript;Havanatranscript;Havanatranscript;Havanatranscript;Havanatranscript;UCSCGenes;UCSCGenes;ENSEMBL;ENSEMBL;UCSCGenes;UCSCGenes	0.00776027
51582	TC08001501.hg.1	TC08001501.hg.1	chr8	-	103838536	103906092	292	67556	103906092	AZIN1	AZIN1;AZIN1;AZIN1;AZIN1;AZIN1;AZIN1;AZIN1;AZIN1;AZIN1;AZIN1;AZIN1;AZIN1;AZIN1;AZIN1;AZIN1;AZIN1;AZIN1	AZIN1	NM_015878;NM_148174;ENST00000337198;ENST00000347770;ENST00000521536;BC013420;BC019279;OTTHUMT00000380133;OTTHUMT00000380135;OTTHUMT00000380136;OTTHUMT00000380138;OTTHUMT00000380139;OTTHUMT00000380140;OTTHUMT00000380141;OTTHUMT00000380142;OTTHUMT00000380437;OTTHUMT00000380464;uc003ykx.3;uc003yky.3	RefSeq;RefSeq;ENSEMBL;ENSEMBL;ENSEMBL;GenBank;GenBank;Havanatranscript;Havanatranscript;Havanatranscript;Havanatranscript;Havanatranscript;Havanatranscript;Havanatranscript;Havanatranscript;Havanatranscript;Havanatranscript;UCSCGenes;UCSCGenes	-0.003018
51599	TC19000462.hg.1	TC19000462.hg.1	chr19	+	35739559	35758867	144	19308	35739559	LSR	LSR;LSR;LSR;LSR;LSR;LSR;LSR;LSR;LSR;LSR;LSR;LSR;LSR;LSR	LSR	NM_015925;NM_205834;NM_205835;ENST00000347609;ENST00000354900;ENST00000360798;ENST00000361790;ENST00000427250;AF130366;AK126834;AK296618;BC047376;uc002nyl.3;uc002nym.3;uc002nyn.3;uc002nyo.3;uc002nyp.3;uc010xsr.2	RefSeq;RefSeq;RefSeq;ENSEMBL;ENSEMBL;ENSEMBL;ENSEMBL;ENSEMBL;GenBank;GenBank;GenBank;GenBank;UCSCGenes;UCSCGenes;UCSCGenes;UCSCGenes;UCSCGenes;UCSCGenes	0.0186631
51646	TC02003138.hg.1	TC02003138.hg.1	chr2	+	30369827	30381647	30	11820	30369827	YPEL5	NA	NA	AF172940	NONCODE	-0.0128393
51726	TC03001019.hg.1	TC03001019.hg.1	chr3	+	186314753	186315061	30	308	186314753	DNAJB11	DNAJB11	DNAJB11	ENST00000538831	ENSEMBL	-0.00340962
5198	TC17002044.hg.1	TC17002044.hg.1	chr17	+	8166237	8167593	40	1356	8166237	PFAS	NA	NA	AY545554	NONCODE	-0.000592142
5204	TC12000435.hg.1	TC12000435.hg.1	chr12	+	53689075	53693234	104	4159	53689075	PFDN5	PFDN5;PFDN5;PFDN5;PFDN5;PFDN5;PFDN5;PFDN5;PFDN5;PFDN5;PFDN5	PFDN5	NM_002624;NM_145897;ENST00000334478;ENST00000351500;ENST00000549759;ENST00000551018;AB055804;AK024094;BC062671;uc001scl.3;uc001scm.3;uc001scn.3;uc001sco.3	RefSeq;RefSeq;ENSEMBL;ENSEMBL;ENSEMBL;ENSEMBL;GenBank;GenBank;GenBank;UCSCGenes;UCSCGenes;UCSCGenes;UCSCGenes	-0.0110895
5217	TC03003395.hg.1	TC03003395.hg.1	chr3	-	149682691	149768575	210	85884	149768575	PFN2	PFN2;PFN2;PFN2;PFN2;PFN2;PFN2;PFN2;PFN2;PFN2;PFN2;PFN2;PFN2;PFN2;PFN2;PFN2;PFN2;PFN2;PFN2;PFN2;PFN2;PFN2;PFN2;PFN2;PFN2;PFN2;PFN2;PFN2;PFN2;PFN2;PFN2;PFN2;PFN2;PFN2;PFN2;PFN2	PFN2	NM_002628;NM_053024;ENST00000239940;ENST00000423691;ENST00000452853;ENST00000461868;ENST00000461930;ENST00000475518;ENST00000481275;ENST00000481767;ENST00000489155;ENST00000490975;ENST00000494827;ENST00000497148;ENST00000498307;AK297915;BC018049;BC043646;BC095444;OTTHUMT00000356873;OTTHUMT00000357088;OTTHUMT00000357089;OTTHUMT00000357090;OTTHUMT00000357092;OTTHUMT00000357093;OTTHUMT00000357094;OT…	RefSeq;RefSeq;ENSEMBL;ENSEMBL;ENSEMBL;ENSEMBL;ENSEMBL;ENSEMBL;ENSEMBL;ENSEMBL;ENSEMBL;ENSEMBL;ENSEMBL;ENSEMBL;ENSEMBL;GenBank;GenBank;GenBank;GenBank;Havanatranscript;Havanatranscript;Havanatranscript;Havanatranscript;Havanatranscript;Havanatranscript;Havanatranscript;Havanatranscript;Havanatranscript;Havanatranscript;Havanatranscript;Havanatranscript;Havanatranscript;Havanatranscript;Havanatrans…	0.000105192
5283	TC14001241.hg.1	TC14001241.hg.1	chr14	-	68056023	68067017	90	10994	68067017	PIGH	PIGH;PIGH;PIGH;PIGH;PIGH;PIGH	PIGH	NM_004569;ENST00000216452;ENST00000559581;ENST00000560722;AK293584;BC004100;BC071849;uc001xjr.1;uc010tsy.1	RefSeq;ENSEMBL;ENSEMBL;ENSEMBL;GenBank;GenBank;GenBank;UCSCGenes;UCSCGenes	0.0173141
5293	TC01000118.hg.1	TC01000118.hg.1	chr1	+	9711790	9789172	420	77382	9711790	PIK3CD	PIK3CD;PIK3CD;PIK3CD;PIK3CD;PIK3CD;PIK3CD;PIK3CD;PIK3CD;PIK3CD;PIK3CD;PIK3CD;PIK3CD;PIK3CD;PIK3CD;PIK3CD	PIK3CD	NM_005026;ENST00000361110;ENST00000377346;ENST00000536656;ENST00000543390;BC030263;BC132919;BC144264;BC150297;JN190435;OTTHUMT00000004235;OTTHUMT00000004237;OTTHUMT00000004238;OTTHUMT00000099298;OTTHUMT00000099299;U57843;uc001aqa.2;uc001aqb.4;uc001aqe.4;uc010oaf.2;uc021ogb.1;ENST00000360563;ENST00000469267;OTTHUMT00000004236	RefSeq;ENSEMBL;ENSEMBL;ENSEMBL;ENSEMBL;GenBankHTC;GenBank;GenBank;GenBank;GenBank;Havanatranscript;Havanatranscript;Havanatranscript;Havanatranscript;Havanatranscript;GenBank;UCSCGenes;UCSCGenes;UCSCGenes;UCSCGenes;UCSCGenes;ENSEMBL;ENSEMBL;Havanatranscript	-1.39e-05
5295	TC05003038.hg.1	TC05003038.hg.1	chr5	-	67595896	67597636	32	1740	67597636	PIK3R1	NA	NA	L26969	NONCODE	-1.02e-05
5367	TC12001888.hg.1	TC12001888.hg.1	chr12	-	102590237	102591623	30	1386	102591623	PMCH	PMCH;PMCH;PMCH	PMCH	NM_002674;ENST00000329406;BC018048;uc001tjl.3	RefSeq;ENSEMBL;GenBank;UCSCGenes	0.0137134
54075	TC21000835.hg.1	TC21000835.hg.1	chr21	-	19207989	19257925	30	49936	19257925	CHODL-AS1	CHODL-AS1	CHODL-AS1	uc011aca.1	NONCODE	0.00468235
5414	TC17002727.hg.1	TC17002727.hg.1	chr17	-	56597611	56606778	150	9167	56606778	2004-09-01	NA	NA	NR_037155;NR_037156	NONCODE;NONCODE	0.0126995
5434	TC19000996.hg.1	TC19000996.hg.1	chr19	-	1086578	1095391	110	8813	1095391	POLR2E	POLR2E;POLR2E;POLR2E;POLR2E	POLR2E	NM_002695;ENST00000215587;AK295975;BC004441;BC034144;uc002lre.4;uc010xgf.2	RefSeq;ENSEMBL;GenBank;GenBank;GenBank;UCSCGenes;UCSCGenes	0.0109851
54435	TC06001489.hg.1	TC06001489.hg.1	chr6	-	29758808	29760850	30	2042	29760850	HCG4	HCG4;HCG4;HCG4	HCG4	NR_002139;NR_002139;uc003nns.3	RefSeq;NONCODE;UCSCGenes	0.00281553
54467	TC07000547.hg.1	TC07000547.hg.1	chr7	+	91875548	92030698	300	155150	91875548	ANKIB1	ANKIB1;ANKIB1;ANKIB1;ANKIB1;ANKIB1;ANKIB1;ANKIB1;ANKIB1;ANKIB1;ANKIB1;ANKIB1	ANKIB1	NM_019004;ENST00000265742;ENST00000486698;BC041643;OTTHUMT00000342018;OTTHUMT00000342019;OTTHUMT00000342020;OTTHUMT00000342021;OTTHUMT00000342022;OTTHUMT00000342023;OTTHUMT00000342024;uc003ulw.2;uc010lew.1	RefSeq;ENSEMBL;ENSEMBL;GenBankHTC;Havanatranscript;Havanatranscript;Havanatranscript;Havanatranscript;Havanatranscript;Havanatranscript;Havanatranscript;UCSCGenes;UCSCGenes	-0.00587962
54494	TC11002311.hg.1	TC11002311.hg.1	chr11	-	114262165	114271139	30	8974	114271139	C11orf71	C11orf71;C11orf71	C11orf71	NM_019021;ENST00000325636;BC071695;uc001pot.1	RefSeq;ENSEMBL;GenBank;UCSCGenes	0.0174098
5465	TC22001152.hg.1	TC22001152.hg.1	chr22	+	46546502	46594307	87	47805	46546502	PPARA	NA	NA	AF270490;AY258329;AY258330;AY258331	NONCODE;NONCODE;NONCODE;NONCODE	0.00644417
54805	TC10000769.hg.1	TC10000769.hg.1	chr10	+	104678071	104838344	170	160273	104678071	CNNM2	CNNM2;CNNM2;CNNM2;CNNM2;CNNM2;CNNM2;CNNM2;CNNM2;CNNM2;CNNM2;CNNM2;CNNM2;CNNM2;CNNM2	CNNM2	NM_017649;NM_199076;NM_199077;ENST00000369875;ENST00000369878;ENST00000433628;ENST00000475511;BC021222;OTTHUMT00000050113;OTTHUMT00000050114;OTTHUMT00000050115;OTTHUMT00000050116;uc001kwl.3;uc001kwm.3;uc001kwn.3;ENST00000345419;ENST00000541201	RefSeq;RefSeq;RefSeq;ENSEMBL;ENSEMBL;ENSEMBL;ENSEMBL;GenBank;Havanatranscript;Havanatranscript;Havanatranscript;Havanatranscript;UCSCGenes;UCSCGenes;UCSCGenes;ENSEMBL;ENSEMBL	0.0438836
54854	TC19001686.hg.1	TC19001686.hg.1	chr19	-	49103857	49116694	60	12837	49116694	FAM83E	FAM83E;FAM83E;FAM83E	FAM83E	NM_017708;ENST00000263266;BC111970;uc002pjn.2	RefSeq;ENSEMBL;GenBank;UCSCGenes	-0.0402119
54933	TC01002534.hg.1	TC01002534.hg.1	chr1	-	39351479	39407471	140	55992	39407471	RHBDL2	RHBDL2;RHBDL2;RHBDL2;RHBDL2;RHBDL2;RHBDL2;RHBDL2;RHBDL2;RHBDL2;RHBDL2;RHBDL2	RHBDL2	NM_017821;ENST00000289248;ENST00000372990;ENST00000540558;AK294115;BC013103;BC137108;BC144477;OTTHUMT00000001216;OTTHUMT00000001217;uc001ccu.1;uc001ccv.3;uc010oin.1;uc010oio.1;ENST00000538156	RefSeq;ENSEMBL;ENSEMBL;ENSEMBL;GenBank;GenBank;GenBank;GenBankHTC;Havanatranscript;Havanatranscript;UCSCGenes;UCSCGenes;UCSCGenes;UCSCGenes;ENSEMBL	0.00032757
55108	TC01002471.hg.1	TC01002471.hg.1	chr1	-	32830704	32860332	288	29628	32860332	BSDC1	BSDC1;BSDC1;BSDC1;BSDC1;BSDC1;BSDC1;BSDC1;BSDC1;BSDC1;BSDC1;BSDC1;BSDC1;BSDC1;BSDC1;BSDC1;BSDC1;BSDC1;BSDC1;BSDC1;BSDC1;BSDC1;BSDC1;BSDC1;BSDC1	BSDC1	NM_001143888;NM_001143889;NM_001143890;NM_018045;ENST00000341071;ENST00000419121;ENST00000446293;ENST00000455895;ENST00000463967;ENST00000526031;AK300231;BC026322;BC028381;BX641056;OTTHUMT00000020056;OTTHUMT00000020057;OTTHUMT00000020058;OTTHUMT00000020203;OTTHUMT00000092787;uc001bvg.4;uc001bvh.4;uc001bvi.3;uc001bvj.3;uc010ohg.2;uc010ohh.2;uc010ohi.2;ENST00000325745;ENST00000413080;ENST00000449308	RefSeq;RefSeq;RefSeq;RefSeq;ENSEMBL;ENSEMBL;ENSEMBL;ENSEMBL;ENSEMBL;ENSEMBL;GenBank;GenBank;GenBank;GenBankHTC;Havanatranscript;Havanatranscript;Havanatranscript;Havanatranscript;Havanatranscript;UCSCGenes;UCSCGenes;UCSCGenes;UCSCGenes;UCSCGenes;UCSCGenes;UCSCGenes;ENSEMBL;ENSEMBL;ENSEMBL	-0.0201809
55166	TC06000640.hg.1	TC06000640.hg.1	chr6	+	49431096	49460820	112	29724	49431096	CENPQ	CENPQ;CENPQ;CENPQ	CENPQ	NM_018132;ENST00000335783;BC016279;OTTHUMT00000040855;uc003ozh.1	RefSeq;ENSEMBL;GenBank;Havanatranscript;UCSCGenes	0.00148036
5525	TC01001771.hg.1	TC01001771.hg.1	chr1	+	212458782	212535205	270	76423	212458782	PPP2R5A	PPP2R5A;PPP2R5A;PPP2R5A;PPP2R5A;PPP2R5A;PPP2R5A;PPP2R5A;PPP2R5A;PPP2R5A;PPP2R5A	PPP2R5A	NM_001199756;NM_006243;ENST00000261461;ENST00000498129;ENST00000537030;BC022474;BC110883;OTTHUMT00000089302;OTTHUMT00000089303;OTTHUMT00000089304;OTTHUMT00000089305;uc001hjb.3;uc010ptd.2;ENST00000542178	RefSeq;RefSeq;ENSEMBL;ENSEMBL;ENSEMBL;GenBank;GenBank;Havanatranscript;Havanatranscript;Havanatranscript;Havanatranscript;UCSCGenes;UCSCGenes;ENSEMBL	-0.0113396
553103	TC05003235.hg.1	TC05003235.hg.1	chr5	-	131646969	131705608	91	58639	131705608	LOC553103	;LOC553103	LOC553103	NR_037898;uc003kwu.1	NONCODE;NONCODE	0.0049384
55450	TC01002314.hg.1	TC01002314.hg.1	chr1	-	20808884	20812728	40	3844	20812728	CAMK2N1	CAMK2N1;CAMK2N1;CAMK2N1;CAMK2N1;CAMK2N1	CAMK2N1	NM_018584;ENST00000375078;ENST00000489020;OTTHUMT00000007949;OTTHUMT00000007950;uc001bdh.3	RefSeq;ENSEMBL;ENSEMBL;Havanatranscript;Havanatranscript;UCSCGenes	0.00738077
55478	TC01005075.hg.1	TC01005075.hg.1	chr1	+	227237319	227238751	30	1432	227237319	PRO2012	NA	NA	AF116681	NONCODE	0.00335643
55552;79973	TC19001189.hg.1	TC19001189.hg.1	chr19	-	11832080	11849824	84	17744	11849824	ZNF823;ZNF442	ZNF823;ZNF823;ZNF823;ZNF823;ZNF823;ZNF823;ZNF823;ZNF823;ZNF823;ZNF823	ZNF823	NM_001080493;ENST00000341191;ENST00000440527;ENST00000545749;AK303213;AK308189;BC052597;OTTHUMT00000344515;OTTHUMT00000344516;OTTHUMT00000344517;uc002msm.2;uc010dyi.1;uc010xmd.1	RefSeq;ENSEMBL;ENSEMBL;ENSEMBL;GenBank;GenBankHTC;GenBank;Havanatranscript;Havanatranscript;Havanatranscript;UCSCGenes;UCSCGenes;UCSCGenes	-0.0199331
55604	TC06000153.hg.1	TC06000153.hg.1	chr6	+	25279306	25620758	542	341452	25279306	LRRC16A	LRRC16A;LRRC16A;LRRC16A;LRRC16A;LRRC16A;LRRC16A;LRRC16A;LRRC16A;LRRC16A;LRRC16A;LRRC16A;LRRC16A	LRRC16A	NM_001173977;NM_017640;ENST00000329474;ENST00000476458;AK123817;AY927593;BC140770;OTTHUMT00000040045;OTTHUMT00000040046;OTTHUMT00000040047;OTTHUMT00000280566;uc010jpy.3;uc011djw.2;ENST00000377969;ENST00000399313;OTTHUMT00000040042;uc003nez.1;uc003nfa.1	RefSeq;RefSeq;ENSEMBL;ENSEMBL;GenBank;GenBankHTC;GenBank;Havanatranscript;Havanatranscript;Havanatranscript;Havanatranscript;UCSCGenes;UCSCGenes;ENSEMBL;ENSEMBL;Havanatranscript;UCSCGenes;UCSCGenes	-0.0151172
55605	TC12001391.hg.1	TC12001391.hg.1	chr12	-	39687030	39837192	430	150162	39837192	KIF21A	KIF21A;KIF21A;KIF21A;KIF21A;;KIF21A;KIF21A;KIF21A;KIF21A;KIF21A;KIF21A;KIF21A;KIF21A;KIF21A;KIF21A;KIF21A;KIF21A;KIF21A;KIF21A	KIF21A	NM_001173463;NM_001173464;NM_001173465;NM_017641;ENST00000361418;ENST00000361961;ENST00000541463;ENST00000544797;AK124704;BC047572;BC136414;BX537855;uc001rlt.3;uc001rlu.3;uc001rlw.3;uc001rlx.3;uc001rly.3;uc001rlz.3;uc010skl.2;ENST00000341813;ENST00000395670;ENST00000545778;ENST00000517165;ENST00000547745;CR749623;uc001rlv.3	RefSeq;RefSeq;RefSeq;RefSeq;ENSEMBL;ENSEMBL;ENSEMBL;ENSEMBL;GenBank;GenBank;GenBank;GenBank;UCSCGenes;UCSCGenes;UCSCGenes;UCSCGenes;UCSCGenes;UCSCGenes;UCSCGenes;ENSEMBL;ENSEMBL;ENSEMBL;ENSEMBL;ENSEMBL;GenBankHTC;UCSCGenes	0.00530809
55655	TC19000887.hg.1	TC19000887.hg.1	chr19	+	55476620	55512510	227	35890	55476620	NLRP2	NLRP2;NLRP2;NLRP2;NLRP2;NLRP2;NLRP2;NLRP2;NLRP2;NLRP2;NLRP2;NLRP2;NLRP2;NLRP2;NLRP2;NLRP2;NLRP2;NLRP2;NLRP2;NLRP2	NLRP2	NM_001174081;NM_001174082;NM_001174083;NM_017852;ENST00000263437;ENST00000339757;ENST00000391721;ENST00000397169;ENST00000427260;ENST00000448584;ENST00000537859;ENST00000543010;AB209300;AK292681;BC001039;BC003592;BC039269;uc002qij.3;uc010esn.3;uc010eso.3;uc010esp.3;uc010yfp.2;uc021vbq.1;ENST00000538819	RefSeq;RefSeq;RefSeq;RefSeq;ENSEMBL;ENSEMBL;ENSEMBL;ENSEMBL;ENSEMBL;ENSEMBL;ENSEMBL;ENSEMBL;GenBank;GenBank;GenBank;GenBank;GenBank;UCSCGenes;UCSCGenes;UCSCGenes;UCSCGenes;UCSCGenes;UCSCGenes;ENSEMBL	-0.02464
55679	TC02002284.hg.1	TC02002284.hg.1	chr2	-	128395956	128439360	427	43404	128439360	LIMS2	LIMS2;LIMS2;LIMS2;LIMS2;LIMS2;LIMS2;LIMS2;LIMS2;LIMS2;LIMS2;LIMS2;LIMS2;LIMS2;LIMS2;LIMS2;LIMS2;LIMS2;LIMS2;LIMS2;LIMS2;LIMS2;LIMS2;LIMS2;LIMS2;LIMS2;LIMS2;LIMS2;LIMS2;LIMS2;LIMS2;LIMS2;LIMS2;LIMS2;LIMS2;LIMS2;LIMS2;LIMS2;LIMS2;LIMS2;LIMS2	LIMS2	NM_001136037;NM_001161403;NM_001161404;NM_017980;ENST00000324938;ENST00000355119;ENST00000409254;ENST00000409286;ENST00000409455;ENST00000409754;ENST00000409808;ENST00000410011;ENST00000410038;ENST00000494613;ENST00000545738;AF527767;AF527768;AK055363;AK095790;BC065816;OTTHUMT00000254386;OTTHUMT00000331105;OTTHUMT00000331106;OTTHUMT00000331107;OTTHUMT00000331108;OTTHUMT00000331109;OTTHUMT00000331…	RefSeq;RefSeq;RefSeq;RefSeq;ENSEMBL;ENSEMBL;ENSEMBL;ENSEMBL;ENSEMBL;ENSEMBL;ENSEMBL;ENSEMBL;ENSEMBL;ENSEMBL;ENSEMBL;GenBank;GenBank;GenBank;GenBank;GenBank;Havanatranscript;Havanatranscript;Havanatranscript;Havanatranscript;Havanatranscript;Havanatranscript;Havanatranscript;Havanatranscript;Havanatranscript;Havanatranscript;Havanatranscript;Havanatranscript;Havanatranscript;Havanatranscript;Havan…	-0.00350075
55686	TC02005051.hg.1	TC02005051.hg.1	chr2	-	216807314	216898819	205	91505	216898819	MREG	MREG;MREG;MREG;MREG;MREG;MREG	MREG	NM_018000;ENST00000263268;BC032747;BC082990;OTTHUMT00000337297;OTTHUMT00000337298;OTTHUMT00000337299;OTTHUMT00000337300;uc002vfo.3;ENST00000236976;OTTHUMT00000337304	RefSeq;ENSEMBL;GenBank;GenBank;Havanatranscript;Havanatranscript;Havanatranscript;Havanatranscript;UCSCGenes;ENSEMBL;Havanatranscript	-0.0448132
5570	TC06000948.hg.1	TC06000948.hg.1	chr6	+	122793062	123047518	180	254456	122793062	PKIB	PKIB;PKIB;PKIB;PKIB;PKIB;PKIB;PKIB;PKIB;PKIB;PKIB;PKIB;PKIB;PKIB;PKIB;PKIB;PKIB;PKIB;PKIB;PKIB	PKIB	NM_032471;NM_181794;NM_181795;ENST00000258014;ENST00000354275;ENST00000368446;ENST00000368448;ENST00000368452;ENST00000392490;ENST00000392491;AK074397;BC036011;BC093027;uc003pyz.3;uc003pza.3;uc003pzb.3;OTTHUMT00000042030;ENST00000392074;OTTHUMT00000042032;OTTHUMT00000042033;OTTHUMT00000042034;OTTHUMT00000042035;OTTHUMT00000042036;uc003pzc.3;uc011ebq.2	RefSeq;RefSeq;RefSeq;ENSEMBL;ENSEMBL;ENSEMBL;ENSEMBL;ENSEMBL;ENSEMBL;ENSEMBL;GenBank;GenBank;GenBank;UCSCGenes;UCSCGenes;UCSCGenes;Havanatranscript;ENSEMBL;Havanatranscript;Havanatranscript;Havanatranscript;Havanatranscript;Havanatranscript;UCSCGenes;UCSCGenes	0.0189965
55768	TC03002840.hg.1	TC03002840.hg.1	chr3	-	25760878	25761779	30	901	25761779	NGLY1	NA	NA	AB114414;AB114415	NONCODE;NONCODE	0.00137825
55795	TC13000892.hg.1	TC13000892.hg.1	chr13	-	113831891	113863029	373	31138	113863029	PCID2	PCID2;PCID2;PCID2;PCID2;PCID2;PCID2;PCID2;PCID2;PCID2;PCID2;PCID2;PCID2;PCID2;PCID2;PCID2;PCID2;PCID2;PCID2;PCID2;PCID2;PCID2;PCID2;PCID2;PCID2	PCID2	NM_001127202;NM_001127203;NM_018386;ENST00000246505;ENST00000337344;ENST00000375457;ENST00000375459;ENST00000375477;ENST00000375479;ENST00000493650;AK002167;AK024478;BC016614;BC031246;OTTHUMT00000045897;OTTHUMT00000045898;OTTHUMT00000045899;OTTHUMT00000045900;OTTHUMT00000045901;OTTHUMT00000045902;OTTHUMT00000045903;OTTHUMT00000045904;OTTHUMT00000045905;OTTHUMT00000045907;OTTHUMT00000045909;OTTHUM…	RefSeq;RefSeq;RefSeq;ENSEMBL;ENSEMBL;ENSEMBL;ENSEMBL;ENSEMBL;ENSEMBL;ENSEMBL;GenBank;GenBank;GenBank;GenBank;Havanatranscript;Havanatranscript;Havanatranscript;Havanatranscript;Havanatranscript;Havanatranscript;Havanatranscript;Havanatranscript;Havanatranscript;Havanatranscript;Havanatranscript;Havanatranscript;Havanatranscript;Havanatranscript;ENSEMBL;ENSEMBL;ENSEMBL;Havanatranscript;Havanatrans…	-0.00206738
55847	TC10000358.hg.1	TC10000358.hg.1	chr10	+	60028818	60049346	150	20528	60028818	CISD1	CISD1;CISD1;CISD1;CISD1;CISD1;CISD1;CISD1	CISD1	NM_018464;ENST00000333926;ENST00000488388;AJ293401;BC005962;BC007043;BC008474;BC059168;OTTHUMT00000048137;OTTHUMT00000048138;OTTHUMT00000048139;OTTHUMT00000048140;uc001jkc.4;uc001jkd.4	RefSeq;ENSEMBL;ENSEMBL;GenBank;GenBank;GenBank;GenBank;GenBank;Havanatranscript;Havanatranscript;Havanatranscript;Havanatranscript;UCSCGenes;UCSCGenes	1.1e-05
56101	TC05000764.hg.1	TC05000764.hg.1	chr5	+	140777604	140780223	30	2619	140777604	PCDHGB5	NA	NA	BC093877;BC093879	GenBank;GenBank	0.0143938
56110	TC05000763.hg.1	TC05000763.hg.1	chr5	+	140743799	140746368	30	2569	140743799	PCDHGA5	NA	NA	BC104926	GenBank	0.000222626
5617	TC06001320.hg.1	TC06001320.hg.1	chr6	-	22287473	22303082	114	15609	22303082	PRL	PRL;PRL;PRL;PRL;PRL;PRL;PRL	PRL	NM_000948;NM_001163558;ENST00000306482;BC015850;BC088370;OTTHUMT00000043327;uc003ndo.3;uc003ndp.3;uc003ndq.3;uc003ndr.1;X54394;ENST00000438606	RefSeq;RefSeq;ENSEMBL;GenBank;GenBank;Havanatranscript;UCSCGenes;UCSCGenes;UCSCGenes;UCSCGenes;GenBank;ENSEMBL	-0.00332481
56670	TC03000831.hg.1	TC03000831.hg.1	chr3	+	151591431	151599876	40	8445	151591431	SUCNR1	SUCNR1;SUCNR1;SUCNR1	SUCNR1	NM_033050;ENST00000362032;BC030948;OTTHUMT00000357897;uc003ezf.2	RefSeq;ENSEMBL;GenBank;Havanatranscript;UCSCGenes	-0.00278924
567	TC15002179.hg.1	TC15002179.hg.1	chr15	+	45003731	45007845	30	4114	45003731	B2M	NA	NA	X07621	NONCODE	0.00722989
57110	TC03001063.hg.1	TC03001063.hg.1	chr3	+	192958914	192995527	69	36613	192958914	HRASLS	HRASLS;HRASLS;HRASLS;HRASLS	HRASLS	NM_020386;ENST00000264735;BC048095;OTTHUMT00000343020;OTTHUMT00000343021;uc003fta.3	RefSeq;ENSEMBL;GenBank;Havanatranscript;Havanatranscript;UCSCGenes	0.00969103
57194	TC15001079.hg.1	TC15001079.hg.1	chr15	-	25922420	26110317	290	187897	26110317	ATP10A	ATP10A;ATP10A;ATP10A;ATP10A;ATP10A	ATP10A	NM_024490;ENST00000356865;ENST00000553577;BC038712;BC052251;uc001zax.3;uc010ayu.3	RefSeq;ENSEMBL;ENSEMBL;GenBank;GenBank;UCSCGenes;UCSCGenes	-0.0404135
57194	TC15002445.hg.1	TC15002445.hg.1	chr15	-	25917504	25919572	30	2068	25919572	ATP10A	NA	NA	AK091793	NONCODE	-0.0107488
57291	TC04002014.hg.1	TC04002014.hg.1	chr4	+	53578595	53586827	96	8232	53578595	DANCR	DANCR;DANCR;DANCR;DANCR	DANCR	BC045566;ENST00000411630;ENST00000425653;ENST00000441504;ENST00000444958;linc_luo_356	NONCODE;NONCODE;NONCODE;NONCODE;NONCODE;NONCODE	0.00426807
5732	TC14000306.hg.1	TC14000306.hg.1	chr14	+	52781016	52795324	64	14308	52781016	PTGER2	PTGER2;PTGER2;PTGER2;PTGER2	PTGER2	NM_000956;ENST00000245457;ENST00000557436;BC093927;OTTHUMT00000276890;uc001wzr.3	RefSeq;ENSEMBL;ENSEMBL;GenBank;Havanatranscript;UCSCGenes	0.0183302
574042	TC16000769.hg.1	TC16000769.hg.1	chr16	-	2012335	2012467	30	132	2012467	SNORA10	SNORA10;SNORA10;SNORA10;SNORA10;SNORA10;SNORA10;SNORA10	SNORA10	NR_002327;ENST00000384084;NR_002327;uc002cnp.1;uc002cnp.1	RefSeq;ENSEMBL;NONCODE;UCSCGenes;NONCODE	0.0101865
57542	TC12000272.hg.1	TC12000272.hg.1	chr12	+	27932953	27955973	90	23020	27932953	KLHL42	KLHL42;KLHL42;KLHL42	KLHL42	NM_020782;ENST00000381271;BC108669;BC137116;BC137117;uc001rij.3	RefSeq;ENSEMBL;GenBank;GenBank;GenBank;UCSCGenes	-0.000439124
57553	TC22000478.hg.1	TC22000478.hg.1	chr22	-	18270416	18507325	606	236909	18507325	MICAL3	MICAL3;MICAL3;MICAL3;;MICAL3;MICAL3;MICAL3;MICAL3;MICAL3;MICAL3;MICAL3;MICAL3;MICAL3;MICAL3;MICAL3;MICAL3;MICAL3;MICAL3;MICAL3;MICAL3;MICAL3;MICAL3;MICAL3;MICAL3;MICAL3;MICAL3;MICAL3;MICAL3;MICAL3;MICAL3;MICAL3;MICAL3;MICAL3;MICAL3	MICAL3	NM_001122731;NM_001136004;NM_015241;ENST00000383094;ENST00000400561;ENST00000414725;ENST00000441493;ENST00000462645;ENST00000498573;AB037785;AK127487;AK289506;AK295978;BC046364;BC064400;BC115391;BC157876;OTTHUMT00000316087;OTTHUMT00000316088;OTTHUMT00000316089;OTTHUMT00000316090;OTTHUMT00000316091;OTTHUMT00000316092;OTTHUMT00000316093;OTTHUMT00000316094;OTTHUMT00000316095;OTTHUMT00000316176;uc002…	RefSeq;RefSeq;RefSeq;ENSEMBL;ENSEMBL;ENSEMBL;ENSEMBL;ENSEMBL;ENSEMBL;GenBank;GenBank;GenBank;GenBank;GenBankHTC;GenBank;GenBank;GenBank;Havanatranscript;Havanatranscript;Havanatranscript;Havanatranscript;Havanatranscript;Havanatranscript;Havanatranscript;Havanatranscript;Havanatranscript;Havanatranscript;UCSCGenes;UCSCGenes;UCSCGenes;UCSCGenes;UCSCGenes;UCSCGenes;UCSCGenes;UCSCGenes;UCSCGenes;UCS…	0.0015259
57559	TC10002941.hg.1	TC10002941.hg.1	chr10	+	90639491	90734910	240	95419	90639491	STAMBPL1	STAMBPL1;STAMBPL1;STAMBPL1;STAMBPL1;STAMBPL1;STAMBPL1;STAMBPL1;STAMBPL1;STAMBPL1;STAMBPL1;STAMBPL1;STAMBPL1	STAMBPL1	NM_020799;ENST00000371922;ENST00000371924;ENST00000371926;ENST00000371927;ENST00000461650;AB037794;AK092946;BC010846;BX649096;OTTHUMT00000049283;OTTHUMT00000049284;OTTHUMT00000049285;OTTHUMT00000049286;OTTHUMT00000049287;OTTHUMT00000049288;uc001kfk.3;uc001kfl.3;uc001kfn.3;uc009xto.3;uc010qmx.1	RefSeq;ENSEMBL;ENSEMBL;ENSEMBL;ENSEMBL;ENSEMBL;GenBank;GenBank;GenBank;GenBank;Havanatranscript;Havanatranscript;Havanatranscript;Havanatranscript;Havanatranscript;Havanatranscript;UCSCGenes;UCSCGenes;UCSCGenes;UCSCGenes;UCSCGenes	-0.00926246
57633	TC03002196.hg.1	TC03002196.hg.1	chr3	+	3890621	3891518	30	897	3890621	LRRN1	NA	NA	BC012463	NONCODE	0.00244175
57643	TC01002605.hg.1	TC01002605.hg.1	chr1	-	45482071	45771881	170	289810	45771881	ZSWIM5	ZSWIM5;ZSWIM5;ZSWIM5;ZSWIM5;ZSWIM5	ZSWIM5	NM_020883;ENST00000359600;ENST00000464588;OTTHUMT00000024823;OTTHUMT00000024862;uc001cnd.2	RefSeq;ENSEMBL;ENSEMBL;Havanatranscript;Havanatranscript;UCSCGenes	0.0292935
57683	TC02001217.hg.1	TC02001217.hg.1	chr2	+	207139387	207179148	60	39761	207139387	ZDBF2	ZDBF2;ZDBF2;ZDBF2	ZDBF2	NM_020923;ENST00000374423;OTTHUMT00000336458;uc002vbp.2	RefSeq;ENSEMBL;Havanatranscript;UCSCGenes	-0.00170793
57707	TC16001313.hg.1	TC16001313.hg.1	chr16	-	84509966	84538296	178	28330	84538296	TLDC1	TLDC1;TLDC1;TLDC1;TLDC1;TLDC1	TLDC1	NM_020947;ENST00000343629;AK300132;BC023251;BC060844;uc002fib.3;uc010vod.2;ENST00000535580;ENST00000545792	RefSeq;ENSEMBL;GenBank;GenBank;GenBank;UCSCGenes;UCSCGenes;ENSEMBL;ENSEMBL	0.0027349
5783	TC04002094.hg.1	TC04002094.hg.1	chr4	+	87515885	87736302	450	220417	87515885	PTPN13	NA	NA	D21211	NONCODE	0.0115363
5783	TC04000469.hg.1	TC04000469.hg.1	chr4	+	87515468	87736328	570	220860	87515468	PTPN13	PTPN13;PTPN13;PTPN13;PTPN13;PTPN13;PTPN13;PTPN13;PTPN13;PTPN13;PTPN13;PTPN13;PTPN13;PTPN13;PTPN13;PTPN13;PTPN13;PTPN13;PTPN13;PTPN13;PTPN13;PTPN13;PTPN13;PTPN13	PTPN13	NM_006264;NM_080683;NM_080684;NM_080685;ENST00000316707;ENST00000411767;ENST00000427191;ENST00000436978;ENST00000502971;ENST00000511467;BC140777;BX647553;uc003hpy.3;uc003hpz.3;uc003hqa.3;uc003hqb.3;uc003hqc.1;ENST00000357349;OTTHUMT00000363189;OTTHUMT00000363190;OTTHUMT00000363191;OTTHUMT00000363193;OTTHUMT00000363194;OTTHUMT00000363196;OTTHUMT00000363197;OTTHUMT00000363198	RefSeq;RefSeq;RefSeq;RefSeq;ENSEMBL;ENSEMBL;ENSEMBL;ENSEMBL;ENSEMBL;ENSEMBL;GenBank;GenBankHTC;UCSCGenes;UCSCGenes;UCSCGenes;UCSCGenes;UCSCGenes;ENSEMBL;Havanatranscript;Havanatranscript;Havanatranscript;Havanatranscript;Havanatranscript;Havanatranscript;Havanatranscript;Havanatranscript	0.012734
58160	TC07002504.hg.1	TC07002504.hg.1	chr7	+	102613969	102629303	40	15334	102613969	NFE4	NA	NA	BC036938	NONCODE	-0.00503234
5828	TC08001347.hg.1	TC08001347.hg.1	chr8	-	77892494	77913280	159	20786	77913280	PEX2	PEX2;PEX2;PEX2;PEX2;PEX2;PEX2;PEX2;PEX2;PEX2;PEX2;PEX2;PEX2;PEX2;PEX2;PEX2;PEX2;PEX2;PEX2;PEX2;PEX2;PEX2	PEX2	NM_000318;NM_001079867;NM_001172086;NM_001172087;ENST00000357039;ENST00000520103;ENST00000520203;ENST00000522527;AL832262;BC000661;BC005375;BC093043;OTTHUMT00000379122;OTTHUMT00000379123;OTTHUMT00000379124;OTTHUMT00000379125;OTTHUMT00000379126;OTTHUMT00000379127;uc003yax.3;uc003yay.3;uc022awe.1;uc022awf.1;ENST00000419564;uc010lzn.1;uc022awg.1	RefSeq;RefSeq;RefSeq;RefSeq;ENSEMBL;ENSEMBL;ENSEMBL;ENSEMBL;GenBankHTC;GenBank;GenBank;GenBank;Havanatranscript;Havanatranscript;Havanatranscript;Havanatranscript;Havanatranscript;Havanatranscript;UCSCGenes;UCSCGenes;UCSCGenes;UCSCGenes;ENSEMBL;UCSCGenes;UCSCGenes	-0.0140008
58503	TC04000385.hg.1	TC04000385.hg.1	chr4	+	71263599	71275914	80	12315	71263599	PROL1	PROL1;PROL1;PROL1;PROL1;PROL1;PROL1	PROL1	NM_021225;ENST00000399575;ENST00000514338;OTTHUMT00000362639;OTTHUMT00000362640;OTTHUMT00000362641;uc003hfi.3	RefSeq;ENSEMBL;ENSEMBL;Havanatranscript;Havanatranscript;Havanatranscript;UCSCGenes	-0.00214496
5875	TC14000972.hg.1	TC14000972.hg.1	chr14	-	24734744	24740945	263	6201	24740945	RABGGTA	RABGGTA;RABGGTA;RABGGTA;RABGGTA;RABGGTA;RABGGTA;RABGGTA	RABGGTA	NM_004581;NM_182836;ENST00000216840;ENST00000399409;ENST00000559586;ENST00000560777;ENST00000560871;BC003093;uc001wof.3;uc001wog.3	RefSeq;RefSeq;ENSEMBL;ENSEMBL;ENSEMBL;ENSEMBL;ENSEMBL;GenBank;UCSCGenes;UCSCGenes	0.00206597
5886	TC19000233.hg.1	TC19000233.hg.1	chr19	+	13056654	13064456	106	7802	13056654	RAD23A	RAD23A;RAD23A;RAD23A	RAD23A	NM_005053;ENST00000316856;AK293219;BC014026;BC088364;ENST00000541222;uc002mvw.1;uc002mvz.1;uc010xmw.1	RefSeq;ENSEMBL;GenBank;GenBank;GenBank;ENSEMBL;UCSCGenes;UCSCGenes;UCSCGenes	0.00178647
5908	TC12000601.hg.1	TC12000601.hg.1	chr12	+	69004619	69054385	228	49766	69004619	RAP1B	RAP1B;RAP1B;RAP1B;RAP1B;RAP1B;RAP1B;RAP1B;RAP1B;RAP1B;RAP1B;RAP1B;RAP1B;RAP1B;RAP1B;RAP1B;RAP1B;RAP1B;RAP1B;RAP1B;RAP1B;RAP1B;RAP1B;RAP1B;RAP1B;RAP1B;RAP1B;RAP1B;RAP1B;RAP1B;RAP1B;RAP1B	RAP1B	NM_001010942;NM_001251917;NM_001251918;NM_001251921;NM_001251922;NM_015646;ENST00000250559;ENST00000341355;ENST00000378985;ENST00000393436;ENST00000450214;ENST00000463493;ENST00000537460;ENST00000539091;ENST00000540209;ENST00000541216;ENST00000542145;ENST00000543393;ENST00000543697;AK316543;BC000176;BC078173;BC095467;OTTHUMT00000257821;OTTHUMT00000257822;OTTHUMT00000257823;OTTHUMT00000257825;OTTH…	RefSeq;RefSeq;RefSeq;RefSeq;RefSeq;RefSeq;ENSEMBL;ENSEMBL;ENSEMBL;ENSEMBL;ENSEMBL;ENSEMBL;ENSEMBL;ENSEMBL;ENSEMBL;ENSEMBL;ENSEMBL;ENSEMBL;ENSEMBL;GenBank;GenBank;GenBank;GenBank;Havanatranscript;Havanatranscript;Havanatranscript;Havanatranscript;Havanatranscript;UCSCGenes;UCSCGenes;UCSCGenes;UCSCGenes;UCSCGenes;UCSCGenes;UCSCGenes;ENSEMBL	-0.000117822
59277	TC12001837.hg.1	TC12001837.hg.1	chr12	-	96051583	96184930	180	133347	96184930	NTN4	NTN4;NTN4;NTN4;NTN4;NTN4;NTN4;NTN4;NTN4;NTN4	NTN4	NM_021229;ENST00000343702;ENST00000344911;ENST00000538383;ENST00000552603;ENST00000553059;AK290591;AY330211;BC136798;uc001tei.3;uc009ztf.3;uc009ztg.3	RefSeq;ENSEMBL;ENSEMBL;ENSEMBL;ENSEMBL;ENSEMBL;GenBank;GenBank;GenBank;UCSCGenes;UCSCGenes;UCSCGenes	0.0190662
59335	TC09000739.hg.1	TC09000739.hg.1	chr9	+	133539981	133558384	50	18403	133539981	PRDM12	PRDM12;PRDM12;PRDM12	PRDM12	NM_021619;ENST00000253008;OTTHUMT00000054664;uc004bzt.1	RefSeq;ENSEMBL;Havanatranscript;UCSCGenes	0.00667081
596	TC18000554.hg.1	TC18000554.hg.1	chr18	-	60790579	60987361	109	196782	60987361	BCL2	BCL2;BCL2;BCL2;BCL2;BCL2;BCL2;BCL2;BCL2;BCL2;BCL2	BCL2	NM_000633;NM_000657;ENST00000333681;ENST00000398117;BC027258;M13994;OTTHUMT00000256199;uc002lit.1;uc002liu.1;uc002liv.1;ENST00000444484;uc021ulf.1	RefSeq;RefSeq;ENSEMBL;ENSEMBL;GenBank;GenBank;Havanatranscript;UCSCGenes;UCSCGenes;UCSCGenes;ENSEMBL;UCSCGenes	0.0138661
6035	TC14000902.hg.1	TC14000902.hg.1	chr14	-	21269387	21271437	100	2050	21271437	RNASE1	RNASE1;RNASE1;RNASE1;RNASE1;RNASE1;RNASE1;RNASE1;RNASE1;RNASE1;RNASE1;RNASE1;RNASE1;RNASE1;RNASE1;RNASE1;RNASE1	RNASE1	NM_002933;NM_198232;NM_198234;NM_198235;ENST00000340900;ENST00000397967;ENST00000397970;ENST00000412779;ENST00000555698;BC005324;BC022882;OTTHUMT00000073791;OTTHUMT00000073793;uc001vyf.3;uc001vyg.3;uc001vyh.3;uc001vyi.3;uc021rop.1	RefSeq;RefSeq;RefSeq;RefSeq;ENSEMBL;ENSEMBL;ENSEMBL;ENSEMBL;ENSEMBL;GenBank;GenBank;Havanatranscript;Havanatranscript;UCSCGenes;UCSCGenes;UCSCGenes;UCSCGenes;UCSCGenes	0.00347004
60676	TC01004845.hg.1	TC01004845.hg.1	chr1	+	176432304	176525140	30	92836	176432304	PAPPA2	NA	NA	BC062665;BC104644	NONCODE;NONCODE	-0.00770826
6079	TC11000807.hg.1	TC11000807.hg.1	chr11	+	75111435	75111582	30	147	75111435	SNORD15A	SNORD15A;SNORD15A;SNORD15A;SNORD15A;SNORD15A;SNORD15A;SNORD15A	SNORD15A	NR_000005;ENST00000384214;NR_000005;uc001owj.1;uc001owj.1	RefSeq;ENSEMBL;NONCODE;UCSCGenes;NONCODE	0.0061121
6091	TC03001570.hg.1	TC03001570.hg.1	chr3	-	78646388	79817059	528	1170671	79817059	ROBO1	ROBO1;ROBO1;ROBO1;ROBO1;ROBO1;ROBO1;ROBO1;ROBO1;ROBO1;ROBO1;ROBO1;ROBO1;ROBO1;ROBO1;ROBO1;ROBO1;ROBO1;ROBO1;ROBO1;ROBO1;ROBO1;ROBO1;ROBO1;ROBO1;ROBO1	ROBO1	NM_001145845;NM_002941;NM_133631;ENST00000436010;ENST00000464233;ENST00000466906;ENST00000467549;ENST00000495273;AK095256;AK299920;BC112336;BC115020;BC115022;BC157861;BX538319;OTTHUMT00000352610;OTTHUMT00000352611;OTTHUMT00000352612;OTTHUMT00000352613;OTTHUMT00000352614;OTTHUMT00000352615;OTTHUMT00000352617;OTTHUMT00000352618;OTTHUMT00000352619;OTTHUMT00000352620;uc003dqc.2;uc003dqd.2;uc003dqe.2;…	RefSeq;RefSeq;RefSeq;ENSEMBL;ENSEMBL;ENSEMBL;ENSEMBL;ENSEMBL;GenBank;GenBank;GenBank;GenBank;GenBank;GenBank;GenBank;Havanatranscript;Havanatranscript;Havanatranscript;Havanatranscript;Havanatranscript;Havanatranscript;Havanatranscript;Havanatranscript;Havanatranscript;Havanatranscript;UCSCGenes;UCSCGenes;UCSCGenes;UCSCGenes;UCSCGenes;UCSCGenes;ENSEMBL;ENSEMBL;GenBank;UCSCGenes	-0.027786
619208	TC06000895.hg.1	TC06000895.hg.1	chr6	+	112408674	112423993	50	15319	112408674	FAM229B	FAM229B;FAM229B;FAM229B	FAM229B	NM_001033564;ENST00000368656;BC044912;OTTHUMT00000041870;uc003pvs.3	RefSeq;ENSEMBL;GenBank;Havanatranscript;UCSCGenes	-0.0021995
619427	TC08002158.hg.1	TC08002158.hg.1	chr8	+	145018791	145021955	30	3164	145018791	LOC619427	NA	NA	AL834492	NONCODE	-0.00523733
6208	TC05001937.hg.1	TC05001937.hg.1	chr5	-	149822753	149829319	152	6566	149829319	RPS14	RPS14;RPS14;RPS14;RPS14;RPS14;RPS14;RPS14;RPS14;RPS14;RPS14;RPS14;RPS14;RPS14;RPS14;RPS14;RPS14	RPS14	NM_001025070;NM_001025071;NM_005617;ENST00000312037;ENST00000401695;ENST00000407193;ENST00000521466;BC001126;BC003401;BC006784;BC020515;BC091474;OTTHUMT00000252373;OTTHUMT00000374307;OTTHUMT00000374308;OTTHUMT00000374309;OTTHUMT00000374310;OTTHUMT00000374312;uc003lsh.3;uc003lsi.3;uc003lsj.3	RefSeq;RefSeq;RefSeq;ENSEMBL;ENSEMBL;ENSEMBL;ENSEMBL;GenBank;GenBank;GenBank;GenBank;GenBank;Havanatranscript;Havanatranscript;Havanatranscript;Havanatranscript;Havanatranscript;Havanatranscript;UCSCGenes;UCSCGenes;UCSCGenes	-0.00559233
6227	TC20000489.hg.1	TC20000489.hg.1	chr20	+	60962105	60963576	109	1471	60962105	RPS21	RPS21;RPS21;RPS21;RPS21;RPS21;RPS21;RPS21;RPS21;RPS21;RPS21;RPS21;RPS21;RPS21	RPS21	NM_001024;ENST00000343986;ENST00000370562;ENST00000370592;ENST00000450116;ENST00000492356;BC018140;BC021990;BC071927;OTTHUMT00000080031;OTTHUMT00000080032;OTTHUMT00000080033;OTTHUMT00000080034;uc002ycr.3;uc002ycs.3;uc002yct.3;ENST00000317311	RefSeq;ENSEMBL;ENSEMBL;ENSEMBL;ENSEMBL;ENSEMBL;GenBank;GenBank;GenBankHTC;Havanatranscript;Havanatranscript;Havanatranscript;Havanatranscript;UCSCGenes;UCSCGenes;UCSCGenes;ENSEMBL	0.0083713
6356	TC17000385.hg.1	TC17000385.hg.1	chr17	+	32612687	32615199	60	2512	32612687	CCL11	CCL11;CCL11;CCL11	CCL11	NM_002986;ENST00000305869;BC017850;OTTHUMT00000256377;uc002hia.1	RefSeq;ENSEMBL;GenBank;Havanatranscript;UCSCGenes	0.00013245
6367	TC16000487.hg.1	TC16000487.hg.1	chr16	+	57392684	57400102	40	7418	57392684	CCL22	CCL22;CCL22;CCL22	CCL22	NM_002990;ENST00000219235;BC027952;OTTHUMT00000257328;uc002elh.3	RefSeq;ENSEMBL;GenBank;Havanatranscript;UCSCGenes	0.0168822
63920	TC05002009.hg.1	TC05002009.hg.1	chr5	-	159820155	159827104	80	6949	159827104	ZBED8	C5orf54;C5orf54;C5orf54;C5orf54;C5orf54;C5orf54;C5orf54	C5orf54	NM_022090;ENST00000408953;ENST00000523213;BC032603;OTTHUMT00000374143;OTTHUMT00000374144;uc003lye.1;uc003lyf.1;uc021yhc.1	RefSeq;ENSEMBL;ENSEMBL;GenBank;Havanatranscript;Havanatranscript;UCSCGenes;UCSCGenes;UCSCGenes	0.00952104
63943	TC06001559.hg.1	TC06001559.hg.1	chr6	-	32096484	32098068	30	1584	32098068	FKBPL	FKBPL;FKBPL;FKBPL;FKBPL	FKBPL	NM_022110;ENST00000375156;BC004168;BC011966;OTTHUMT00000076221;uc003nzr.3;uc021yvh.1	RefSeq;ENSEMBL;GenBank;GenBank;Havanatranscript;UCSCGenes;UCSCGenes	0.0182033
63948	TC01000657.hg.1	TC01000657.hg.1	chr1	+	53925072	53933161	120	8089	53925072	DMRTB1	DMRTB1;DMRTB1;DMRTB1;DMRTB1;DMRTB1	DMRTB1	NM_033067;ENST00000371445;ENST00000463126;BC029566;OTTHUMT00000022110;OTTHUMT00000022111;uc001cvq.1;ENST00000431335	RefSeq;ENSEMBL;ENSEMBL;GenBank;Havanatranscript;Havanatranscript;UCSCGenes;ENSEMBL	-0.00219294
64073	TC19000524.hg.1	TC19000524.hg.1	chr19	+	38794804	38795646	60	842	38794804	C19orf33	C19orf33;C19orf33;C19orf33;C19orf33	C19orf33	NM_033520;ENST00000301246;BC008888;BC008888;BC014264;BC060319;uc002ohu.1;uc002ohv.1	RefSeq;ENSEMBL;NONCODE;GenBank;GenBank;GenBank;UCSCGenes;UCSCGenes	0.00079697
64116	TC04002651.hg.1	TC04002651.hg.1	chr4	-	103183267	103183758	30	491	103183758	SLC39A8	NA	NA	AB020969	NONCODE	0.0189178
64127	TC16001882.hg.1	TC16001882.hg.1	chr16	-	50727538	50733845	27	6307	50733845	NOD2	NA	NA	AY187245	NONCODE	0.0171819
641311	TC01003450.hg.1	TC01003450.hg.1	chr1	-	161653485	161655042	30	1557	161655042	RPL31P11	RPL31P11;RPL31P11;RPL31P11	RPL31P11	NR_002595;ENST00000426558;uc001gbc.3;uc001gbc.2	RefSeq;ENSEMBL;UCSCGenes;NONCODE	-0.00639093
642976	TC21000100.hg.1	TC21000100.hg.1	chr21	+	31120494	31136325	90	15831	31120494	GRIK1-AS1	GRIK1-AS1;GRIK1-AS1;GRIK1-AS1;GRIK1-AS1;GRIK1-AS1;GRIK1-AS1;GRIK1-AS1;GRIK1-AS1;GRIK1-AS1;GRIK1-AS1;GRIK1-AS1;GRIK1-AS1	GRIK1-AS1	NR_027021;AY077697;uc002yns.3;uc011acu.2;ENST00000309331;ENST00000412579;ENST00000413131;ENST00000423221;ENST00000455392;OTTHUMT00000182263;OTTHUMT00000182264;OTTHUMT00000182265;OTTHUMT00000182266;OTTHUMT00000182267;uc002yns.2;uc011acu.1	RefSeq;GenBank;UCSCGenes;UCSCGenes;ENSEMBL;ENSEMBL;ENSEMBL;ENSEMBL;ENSEMBL;Havanatranscript;Havanatranscript;Havanatranscript;Havanatranscript;Havanatranscript;NONCODE;NONCODE	1.82e-05
64388	TC01004021.hg.1	TC01004021.hg.1	chr1	-	240652873	240775462	60	122589	240775462	GREM2	GREM2;GREM2;GREM2;GREM2	GREM2	NM_022469;ENST00000318160;BC046632;OTTHUMT00000096286;uc001hys.3;uc021plf.1	RefSeq;ENSEMBL;GenBank;Havanatranscript;UCSCGenes;UCSCGenes	0.0201633
644090	TC07001019.hg.1	TC07001019.hg.1	chr7	+	151503744	151507558	40	3814	151503744	LOC644090	;;;BC040865;	BC040865	BC040865;ENST00000462083;ENST00000481153;OTTHUMT00000348457;OTTHUMT00000348458;uc003wkn.3	GenBank;ENSEMBL;ENSEMBL;Havanatranscript;Havanatranscript;UCSCGenes	-0.000580276
644242	TC01005747.hg.1	TC01005747.hg.1	chr1	-	120102717	120147798	40	45081	120147798	LINC00622	NA	NA	AK123168;TCONS_l2_00001475-XLOC_l2_001075	NONCODE;BroadTUCP	-0.000482698
6461	TC09001908.hg.1	TC09001908.hg.1	chr9	+	38068020	38068715	30	695	38068020	SHB	NA	NA	BC029953	NONCODE	0.00365429
649	TC08001833.hg.1	TC08001833.hg.1	chr8	+	22022653	22069840	210	47187	22022653	BMP1	NA	NA	NR_033403;NR_033404	NONCODE;NONCODE	-0.00107537
6498	TC03000917.hg.1	TC03000917.hg.1	chr3	+	170075466	170114637	260	39171	170075466	SKIL	SKIL;SKIL;SKIL;SKIL;SKIL;SKIL;SKIL;SKIL;SKIL;SKIL;SKIL;SKIL;SKIL;SKIL;SKIL;SKIL;SKIL;SKIL;SKIL;SKIL;SKIL;SKIL;SKIL	SKIL	NM_001145097;NM_001145098;NM_001248008;NM_005414;ENST00000259119;ENST00000413427;ENST00000426052;ENST00000458537;ENST00000490989;BC059386;OTTHUMT00000352351;OTTHUMT00000352404;OTTHUMT00000352405;OTTHUMT00000352407;OTTHUMT00000352408;OTTHUMT00000352409;OTTHUMT00000352410;OTTHUMT00000352411;OTTHUMT00000352412;OTTHUMT00000352413;uc003fgu.3;uc003fgv.3;uc003fgw.3;uc011bps.2	RefSeq;RefSeq;RefSeq;RefSeq;ENSEMBL;ENSEMBL;ENSEMBL;ENSEMBL;ENSEMBL;GenBank;Havanatranscript;Havanatranscript;Havanatranscript;Havanatranscript;Havanatranscript;Havanatranscript;Havanatranscript;Havanatranscript;Havanatranscript;Havanatranscript;UCSCGenes;UCSCGenes;UCSCGenes;UCSCGenes	-0.00477623
6504	TC01003406.hg.1	TC01003406.hg.1	chr1	-	160577890	160617085	189	39195	160617085	SLAMF1	SLAMF1;SLAMF1;SLAMF1;SLAMF1;SLAMF1;SLAMF1;SLAMF1;SLAMF1;SLAMF1;SLAMF1;SLAMF1;SLAMF1;SLAMF1	SLAMF1	NM_003037;ENST00000235739;ENST00000302035;ENST00000494463;ENST00000538290;AK304237;BC132792;BC144498;BC144499;OTTHUMT00000060454;OTTHUMT00000060456;uc001fwl.4;uc010pjk.2;uc010pjl.2;uc010pjm.2;ENST00000355199;ENST00000392208;OTTHUMT00000060455;uc001fwm.3	RefSeq;ENSEMBL;ENSEMBL;ENSEMBL;ENSEMBL;GenBank;GenBank;GenBank;GenBankHTC;Havanatranscript;Havanatranscript;UCSCGenes;UCSCGenes;UCSCGenes;UCSCGenes;ENSEMBL;ENSEMBL;Havanatranscript;UCSCGenes	0.00338482
65084	TC11000878.hg.1	TC11000878.hg.1	chr11	+	86748886	87039876	243	290990	86748886	TMEM135	TMEM135;TMEM135;TMEM135;TMEM135;TMEM135;TMEM135;TMEM135;TMEM135;TMEM135;TMEM135;TMEM135;TMEM135;TMEM135	TMEM135	NM_001168724;NM_022918;NR_033149;ENST00000305494;ENST00000340353;ENST00000532959;BC051462;NR_033149;uc001pch.3;uc001pci.3;uc010rtt.2;ENST00000355734;ENST00000535167;ENST00000544294;uc001pcg.2	RefSeq;RefSeq;RefSeq;ENSEMBL;ENSEMBL;ENSEMBL;GenBank;NONCODE;UCSCGenes;UCSCGenes;UCSCGenes;ENSEMBL;ENSEMBL;ENSEMBL;UCSCGenes	-0.0301123
65084	TC11002813.hg.1	TC11002813.hg.1	chr11	+	86748886	87039876	140	290990	86748886	TMEM135	TMEM135	TMEM135	NR_033149	NONCODE	-0.0165238
6510	TC19001656.hg.1	TC19001656.hg.1	chr19	-	47278140	47291851	134	13711	47291851	SLC1A5	SLC1A5;SLC1A5;SLC1A5;SLC1A5;SLC1A5;SLC1A5;SLC1A5;SLC1A5;SLC1A5;SLC1A5	SLC1A5	NM_001145144;NM_001145145;NM_005628;ENST00000412532;ENST00000434726;ENST00000542575;AK055630;BC000062;uc002pfq.3;uc002pfr.3;uc002pfs.3;uc010xyh.2;ENST00000306894	RefSeq;RefSeq;RefSeq;ENSEMBL;ENSEMBL;ENSEMBL;GenBank;GenBank;UCSCGenes;UCSCGenes;UCSCGenes;UCSCGenes;ENSEMBL	0.0120175
6522	TC07003241.hg.1	TC07003241.hg.1	chr7	-	150767878	150768645	30	767	150768645	SLC4A2	NA	NA	BC128111	NONCODE	0.000902529
6526;64968	TC21000134.hg.1	TC21000134.hg.1	chr21	+	35445524	35732332	203	286808	35445524	SLC5A3;MRPS6	MRPS6;MRPS6;MRPS6;MRPS6;MRPS6;;SLC5A3;;SLC5A3;SLC5A3;;MRPS6;MRPS6;MRPS6;SLC5A3	MRPS6;SLC5A3	NM_006933;NM_032476;ENST00000381151;ENST00000399312;ENST00000482679;BC000547;BC004976;BC010076;BC051302;OTTHUMT00000141033;OTTHUMT00000141034;OTTHUMT00000141035;OTTHUMT00000141036;OTTHUMT00000141037;OTTHUMT00000193779;uc002yto.3;uc002ytp.2;OTTHUMT00000194067;ENST00000427022;OTTHUMT00000194066;uc021wir.1	RefSeq;RefSeq;ENSEMBL;ENSEMBL;ENSEMBL;GenBank;GenBank;GenBank;GenBank;Havanatranscript;Havanatranscript;Havanatranscript;Havanatranscript;Havanatranscript;Havanatranscript;UCSCGenes;UCSCGenes;Havanatranscript;ENSEMBL;Havanatranscript;UCSCGenes	-0.0118813
653125	TC15001171.hg.1	TC15001171.hg.1	chr15	-	32694108	32695493	30	1385	32695493	GOLGA8K			ENST00000435655	ENSEMBL	0.0129348
653316	TC05002771.hg.1	TC05002771.hg.1	chr5	+	177433967	177476088	97	42121	177433967	FAM153C	NA	NA	NR_038353	NONCODE	0.00158409
653319	TC16002084.hg.1	TC16002084.hg.1	chr16	-	67209505	67217943	130	8438	67217943	KIAA0895L	KIAA0895L;KIAA0895L;KIAA0895L;KIAA0895L;KIAA0895L;KIAA0895L	KIAA0895L	NM_001040715;ENST00000290881;AK096855;AL834156;BC080183;uc002err.3;uc002ert.3;uc002eru.3;uc002ers.3	RefSeq;ENSEMBL;GenBank;GenBank;GenBank;UCSCGenes;UCSCGenes;UCSCGenes;UCSCGenes	-0.00203589
653653	TC17002733.hg.1	TC17002733.hg.1	chr17	-	58179121	58180280	30	1159	58180280	LOC653653	NA	NA	NR_027408	NONCODE	0.00145222
654342	TC02004399.hg.1	TC02004399.hg.1	chr2	-	91802598	91848059	153	45461	91848059	LOC654342	LOC654342	LOC654342	uc010yub.1;CR601542;linc_luo_1899;TCONS_l2_00014683-XLOC_l2_008128;TCONS_l2_00014684-XLOC_l2_008128;TCONS_l2_00014685-XLOC_l2_008128;TCONS_l2_00014687-XLOC_l2_008128;TCONS_l2_00015859-XLOC_l2_008128;uc002sts.3	NONCODE;NONCODE;NONCODE;BroadTUCP;BroadTUCP;BroadTUCP;BroadTUCP;BroadTUCP;NONCODE	-0.0157872
654433	TC02000723.hg.1	TC02000723.hg.1	chr2	+	113969099	114024587	249	55488	113969099	PAX8-AS1	PAX8-AS1;PAX8-AS1;PAX8-AS1;PAX8-AS1;;PAX8-AS1;PAX8-AS1;PAX8-AS1;PAX8-AS1;PAX8-AS1;PAX8-AS1;PAX8-AS1;PAX8-AS1;PAX8-AS1;PAX8-AS1;PAX8-AS1;PAX8-AS1;PAX8-AS1;PAX8-AS1;PAX8-AS1;PAX8-AS1;PAX8-AS1;PAX8-AS1;PAX8-AS1;PAX8-AS1;PAX8-AS1;PAX8-AS1;PAX8-AS1;PAX8-AS1;PAX8-AS1	PAX8-AS1	NR_015377;ENST00000333145;ENST00000422956;ENST00000431844;ENST00000436293;ENST00000437551;ENST00000445745;ENST00000451179;ENST00000456685;ENST00000510859;ENST00000553869;ENST00000556070;AK056355;AK130275;AK307781;BX537688;ENST00000333145;ENST00000431844;ENST00000436293;ENST00000437551;ENST00000445745;ENST00000451179;ENST00000456685;ENST00000510859;OTTHUMT00000330807;OTTHUMT00000330808;OTTHUMT0000…	RefSeq;ENSEMBL;ENSEMBL;ENSEMBL;ENSEMBL;ENSEMBL;ENSEMBL;ENSEMBL;ENSEMBL;ENSEMBL;ENSEMBL;ENSEMBL;GenBank;GenBank;GenBankHTC;GenBankHTC;NONCODE;NONCODE;NONCODE;NONCODE;NONCODE;NONCODE;NONCODE;NONCODE;Havanatranscript;Havanatranscript;Havanatranscript;Havanatranscript;Havanatranscript;Havanatranscript;Havanatranscript;Havanatranscript;Havanatranscript;ENSEMBL;UCSCGenes;UCSCGenes;UCSCGenes;UCSCGenes;U…	-0.00760533
6629	TC20001115.hg.1	TC20001115.hg.1	chr20	+	16710705	16717996	40	7291	16710705	SNRPB2	NA	NA	BC008311	NONCODE	0.00736161
6633	TC19001628.hg.1	TC19001628.hg.1	chr19	-	46190712	46195443	44	4731	46195443	SNRPD2	SNRPD2;SNRPD2;SNRPD2;SNRPD2;SNRPD2;SNRPD2	SNRPD2	NM_004597;NM_177542;ENST00000342669;ENST00000391932;BC000486;BC001930;uc002pcv.3;uc002pcw.3	RefSeq;RefSeq;ENSEMBL;ENSEMBL;GenBank;GenBank;UCSCGenes;UCSCGenes	-0.00968432
6660	TC12001307.hg.1	TC12001307.hg.1	chr12	-	23682440	24715524	479	1033084	24715524	SOX5	;;;SOX5;SOX5;SOX5;;SOX5;SOX5;;;;SOX5;SOX5;;;;SOX5;;SOX5;SOX5;SOX5;;SOX5;SOX5;SOX5;SOX5;SOX5;SOX5	SOX5	NM_006940;NM_152989;NM_178010;ENST00000381381;ENST00000396007;ENST00000441133;ENST00000451604;ENST00000536850;ENST00000537393;ENST00000541536;ENST00000541847;ENST00000545921;ENST00000546136;AK096569;AK299607;AK303970;BC014929;BC060773;uc001rfw.3;uc001rfz.1;uc001rga.3;uc010siw.1;ENST00000435266;ENST00000429944;ENST00000446891;ENST00000456299;ENST00000536729;ENST00000538905;ENST00000540811;ENST0000…	RefSeq;RefSeq;RefSeq;ENSEMBL;ENSEMBL;ENSEMBL;ENSEMBL;ENSEMBL;ENSEMBL;ENSEMBL;ENSEMBL;ENSEMBL;ENSEMBL;GenBank;GenBank;GenBank;GenBankHTC;GenBank;UCSCGenes;UCSCGenes;UCSCGenes;UCSCGenes;ENSEMBL;ENSEMBL;ENSEMBL;ENSEMBL;ENSEMBL;ENSEMBL;ENSEMBL;NONCODE;NONCODE;NONCODE;NONCODE;NONCODE;NONCODE;UCSCGenes;UCSCGenes;UCSCGenes;UCSCGenes	-0.047036
671	TC20000281.hg.1	TC20000281.hg.1	chr20	+	36888551	36965907	293	77356	36888551	BPI	BPI;BPI;BPI;BPI;BPI;BPI;BPI;BPI;BPI;BPI;BPI;BPI	BPI	NM_001725;ENST00000262865;ENST00000451435;ENST00000489102;BC040955;OTTHUMT00000079152;OTTHUMT00000079153;OTTHUMT00000079156;OTTHUMT00000079157;OTTHUMT00000079158;OTTHUMT00000079159;OTTHUMT00000079160;OTTHUMT00000276787;uc002xib.2;AK055854;AK055854;uc002xia.1	RefSeq;ENSEMBL;ENSEMBL;ENSEMBL;GenBank;Havanatranscript;Havanatranscript;Havanatranscript;Havanatranscript;Havanatranscript;Havanatranscript;Havanatranscript;Havanatranscript;UCSCGenes;NONCODE;GenBank;UCSCGenes	0.0115896
6711	TC02003240.hg.1	TC02003240.hg.1	chr2	+	54886307	54887268	30	961	54886307	SPTBN1	NA	NA	AJ005694	NONCODE	-0.0121909
6775	TC02002625.hg.1	TC02002625.hg.1	chr2	-	191894302	192038902	449	144600	192038902	STAT4	STAT4;STAT4;STAT4;STAT4;STAT4;STAT4;STAT4;STAT4;STAT4;STAT4;STAT4;STAT4;STAT4;STAT4;STAT4;STAT4;STAT4;STAT4;STAT4;STAT4;STAT4;STAT4;STAT4;STAT4	STAT4	NM_001243835;NM_003151;ENST00000358470;ENST00000392320;ENST00000409995;ENST00000470708;AK300868;AK301172;BC016694;BC031212;EU304788;EU304790;EU304791;EU304792;OTTHUMT00000255998;OTTHUMT00000335586;OTTHUMT00000335588;OTTHUMT00000335589;OTTHUMT00000335590;OTTHUMT00000335591;OTTHUMT00000335592;OTTHUMT00000335593;OTTHUMT00000335594;OTTHUMT00000335595;uc002usm.2;uc002usn.2;uc002uso.2;uc002usp.4;uc010z…	RefSeq;RefSeq;ENSEMBL;ENSEMBL;ENSEMBL;ENSEMBL;GenBank;GenBank;GenBankHTC;GenBank;GenBank;GenBank;GenBank;GenBank;Havanatranscript;Havanatranscript;Havanatranscript;Havanatranscript;Havanatranscript;Havanatranscript;Havanatranscript;Havanatranscript;Havanatranscript;Havanatranscript;UCSCGenes;UCSCGenes;UCSCGenes;UCSCGenes;UCSCGenes;UCSCGenes;UCSCGenes;UCSCGenes;UCSCGenes	2.96e-05
677774	TC01000371.hg.1	TC01000371.hg.1	chr1	+	28160912	28161077	30	165	28160912	SCARNA1	SCARNA1;SCARNA1;SCARNA1;SCARNA1;SCARNA1	SCARNA1	NR_002997;ENST00000517138;NR_002997;uc001boy.1;uc001boy.1	RefSeq;ENSEMBL;NONCODE;UCSCGenes;NONCODE	8.9e-05
677807	TC07000399.hg.1	TC07000399.hg.1	chr7	+	65220513	65220646	30	133	65220513	SNORA22	SNORA22;SNORA22;SNORA22;SNORA22;SNORA22;SNORA22	SNORA22	NR_002961;ENST00000383907;NR_002961;uc003tuj.3;uc003tuj.2	RefSeq;ENSEMBL;NONCODE;UCSCGenes;NONCODE	0.00645396
677820	TC06000375.hg.1	TC06000375.hg.1	chr6	+	31590856	31590987	30	131	31590856	SNORA38	SNORA38;SNORA38;SNORA38;SNORA38;SNORA38;SNORA38	SNORA38	NR_002971;ENST00000363946;NR_002971;uc003nvd.3;uc003nvd.2	RefSeq;ENSEMBL;NONCODE;UCSCGenes;NONCODE	0.0154486
677849	TC17000876.hg.1	TC17000876.hg.1	chr17	+	74557190	74557275	30	85	74557190	SNORD1B	SNORD1B;SNORD1B;SNORD1B;SNORD1B;SNORD1B;SNORD1B;SNORD1B	SNORD1B	NR_004396;ENST00000363091;NR_004396;uc010dgy.1;uc010dgy.1	RefSeq;ENSEMBL;NONCODE;UCSCGenes;NONCODE	0.00466392
692053	TC14000918.hg.1	TC14000918.hg.1	chr14	-	21860309	21860412	30	103	21860412	SNORD9	SNORD9;SNORD9;SNORD9;SNORD9;SNORD9;SNORD9;SNORD9	SNORD9	NR_003029;ENST00000362566;NR_003029;uc001wat.1;uc001wat.1	RefSeq;ENSEMBL;NONCODE;UCSCGenes;NONCODE	0.0596352
692110	TC02001189.hg.1	TC02001189.hg.1	chr2	+	203141154	203141241	30	87	203141154	SNORD70	SNORD70;SNORD70;SNORD70;SNORD70;SNORD70;SNORD70	SNORD70	NR_003058;ENST00000391232;NR_003058;uc002uzc.3;uc002uzc.2	RefSeq;ENSEMBL;NONCODE;UCSCGenes;NONCODE	0.0129937
692208	TC17000992.hg.1	TC17000992.hg.1	chr17	-	2232413	2232507	30	94	2232507	SNORD91B	SNORD91B;SNORD91B;SNORD91B;SNORD91B;SNORD91B;SNORD91B;SNORD91B;SNORD91B;SNORD91B	SNORD91B	NR_003073;ENST00000391250;NR_003073;uc002fuk.1;uc002fuk.1	RefSeq;ENSEMBL;NONCODE;UCSCGenes;NONCODE	0.00493987
692223	TC11001418.hg.1	TC11001418.hg.1	chr11	-	10823014	10823155	30	141	10823155	SNORD97	SNORD97;SNORD97;SNORD97;SNORD97;SNORD97;SNORD97	SNORD97	NR_004403;ENST00000459187;NR_004403;uc009yge.3;uc009yge.2	RefSeq;ENSEMBL;NONCODE;UCSCGenes;NONCODE	-0.0013388
692225	TC02000521.hg.1	TC02000521.hg.1	chr2	+	86362993	86363129	30	136	86362993	SNORD94	SNORD94;SNORD94;SNORD94;SNORD94;SNORD94;SNORD94;SNORD94	SNORD94	NR_004378;ENST00000386037;NR_004378;uc010fgr.1;uc010fgr.1	RefSeq;ENSEMBL;NONCODE;UCSCGenes;NONCODE	0.0144401
7084	TC16001169.hg.1	TC16001169.hg.1	chr16	-	66503747	66584315	227	80568	66584315	TK2	TK2;TK2;TK2;TK2;TK2;TK2;TK2;TK2;TK2;TK2;TK2;TK2;TK2;TK2;TK2;TK2;TK2;TK2;TK2;TK2;TK2	TK2	NM_001172643;NM_001172644;NM_001172645;NM_004614;ENST00000299697;ENST00000417693;ENST00000451102;ENST00000525974;ENST00000527284;ENST00000527800;ENST00000544898;ENST00000545043;AB472397;AK302976;BC113928;BC142970;OTTHUMT00000268806;uc002eor.3;uc002eos.3;uc010cdq.3;uc010cdr.3;uc010vip.2;uc010viq.2;uc010vir.2;uc021tjp.1	RefSeq;RefSeq;RefSeq;RefSeq;ENSEMBL;ENSEMBL;ENSEMBL;ENSEMBL;ENSEMBL;ENSEMBL;ENSEMBL;ENSEMBL;GenBank;GenBank;GenBank;GenBank;Havanatranscript;UCSCGenes;UCSCGenes;UCSCGenes;UCSCGenes;UCSCGenes;UCSCGenes;UCSCGenes;UCSCGenes	0.00390217
7130	TC02000937.hg.1	TC02000937.hg.1	chr2	+	152214106	152236562	98	22456	152214106	TNFAIP6	TNFAIP6;TNFAIP6;TNFAIP6;TNFAIP6	TNFAIP6	NM_007115;ENST00000243347;BC030205;OTTHUMT00000254834;OTTHUMT00000332404;uc002txk.3	RefSeq;ENSEMBL;GenBank;Havanatranscript;Havanatranscript;UCSCGenes	-0.0052925
722	TC01001733.hg.1	TC01001733.hg.1	chr1	+	207277511	207318317	184	40806	207277511	C4BPA	C4BPA;C4BPA;C4BPA;C4BPA;AX229788;AX229788;C4BPA	C4BPA;AX229788	NM_000715;ENST00000367070;BC022312;OTTHUMT00000088089;OTTHUMT00000088105;OTTHUMT00000317671;uc001hfo.3;uc001hfn.1;uc001hfn.1	RefSeq;ENSEMBL;GenBank;Havanatranscript;Havanatranscript;Havanatranscript;UCSCGenes;UCSCGenes;NONCODE	-0.00850064
722	TC01004981.hg.1	TC01004981.hg.1	chr1	+	207286365	207287546	30	1181	207286365	C4BPA	NA	NA	X07853	NONCODE	-0.00905918
728145	TC05002056.hg.1	TC05002056.hg.1	chr5	-	170732985	170735809	30	2824	170735809	LOC728145	NA	NA	ENST00000528269;uc003mbe.1	ENSEMBL;UCSCGenes	0.016615
728358;1667	TC08000910.hg.1	TC08000910.hg.1	chr8	-	6835171	6837614	46	2443	6837614	DEFA1B;DEFA1	DEFA1;DEFA1;DEFA1;DEFA1B;DEFA1;DEFA1	DEFA1;DEFA1B	NM_001042500;NM_004084;ENST00000382679;ENST00000382692;BC069423;BC093791;OTTHUMT00000315817;uc003wqv.1	RefSeq;RefSeq;ENSEMBL;ENSEMBL;GenBank;GenBank;Havanatranscript;UCSCGenes	0.00808706
728358;1667	TC08002630.hg.1	TC08002630.hg.1	chr8	-	6854288	6856724	50	2436	6856724	DEFA1B;DEFA1	DEFA1B;DEFA1B;DEFA1;DEFA1;DEFA1B	DEFA1B;DEFA1	NM_001042500;NM_004084;ENST00000382689;BC069423;BC093791;OTTHUMT00000313536;uc003wqx.1	RefSeq;RefSeq;ENSEMBL;GenBank;GenBank;Havanatranscript;UCSCGenes	0.00711439
728358;1667;1668	TC08002631.hg.1	TC08002631.hg.1	chr8	-	6873391	6875823	40	2432	6875823	DEFA1B;DEFA1;DEFA3	DEFA1B;DEFA3;DEFA3;DEFA1B;DEFA1	DEFA1B;DEFA3;DEFA1	NM_001042500;NM_004084;NM_005217;ENST00000327857;BC027917;BC069423;BC093791;BC119706;OTTHUMT00000206753;uc003wqz.1	RefSeq;RefSeq;RefSeq;ENSEMBL;GenBank;GenBank;GenBank;GenBank;Havanatranscript;UCSCGenes	0.0112885
728377	TC07003219.hg.1	TC07003219.hg.1	chr7	-	143956089	143983096	130	27007	143983096	ARHGEF34P	NA	NA	NR_033942	NONCODE	0.0216022
729041	TC01000586.hg.1	TC01000586.hg.1	chr1	+	46899499	46911374	90	11875	46899499	FAAHP1	LOC729041;;	LOC729041	NR_045483;ENST00000429784;uc021ona.1	RefSeq;ENSEMBL;UCSCGenes	0.000329264
7433	TC03000219.hg.1	TC03000219.hg.1	chr3	+	42530791	42579065	293	48274	42530791	VIPR1	VIPR1;VIPR1;VIPR1;VIPR1;VIPR1;VIPR1;VIPR1;VIPR1;VIPR1;VIPR1;VIPR1;VIPR1;VIPR1;VIPR1;VIPR1;VIPR1;VIPR1;VIPR1;VIPR1;VIPR1;VIPR1;VIPR1;VIPR1;VIPR1;VIPR1;VIPR1;VIPR1;VIPR1;VIPR1;VIPR1;VIPR1	VIPR1	NM_001251882;NM_001251883;NM_001251884;NM_001251885;NM_004624;ENST00000325123;ENST00000433647;ENST00000438259;ENST00000473575;ENST00000543411;BC064424;OTTHUMT00000254728;OTTHUMT00000343238;OTTHUMT00000343239;OTTHUMT00000343240;OTTHUMT00000343243;OTTHUMT00000343319;OTTHUMT00000343320;OTTHUMT00000343321;OTTHUMT00000343322;OTTHUMT00000343323;OTTHUMT00000343324;OTTHUMT00000343328;OTTHUMT00000343416;O…	RefSeq;RefSeq;RefSeq;RefSeq;RefSeq;ENSEMBL;ENSEMBL;ENSEMBL;ENSEMBL;ENSEMBL;GenBank;Havanatranscript;Havanatranscript;Havanatranscript;Havanatranscript;Havanatranscript;Havanatranscript;Havanatranscript;Havanatranscript;Havanatranscript;Havanatranscript;Havanatranscript;Havanatranscript;Havanatranscript;Havanatranscript;Havanatranscript;UCSCGenes;UCSCGenes;UCSCGenes;UCSCGenes;UCSCGenes;UCSCGenes;G…	0.00263504
7580	TC10001205.hg.1	TC10001205.hg.1	chr10	-	44139307	44144326	100	5019	44144326	ZNF32	ZNF32;ZNF32;ZNF32;ZNF32;ZNF32;ZNF32;ZNF32;ZNF32	ZNF32	NM_001005368;NM_006973;ENST00000374433;ENST00000395797;BC022842;OTTHUMT00000047723;OTTHUMT00000047725;uc001jbb.3;uc001jbc.3;ENST00000475186;OTTHUMT00000047724	RefSeq;RefSeq;ENSEMBL;ENSEMBL;GenBank;Havanatranscript;Havanatranscript;UCSCGenes;UCSCGenes;ENSEMBL;Havanatranscript	-0.000936337
767561	TC14000664.hg.1	TC14000664.hg.1	chr14	+	101391158	101391229	30	71	101391158	SNORD113-1	SNORD113-1;SNORD113-1;SNORD113-1;SNORD113-1;SNORD113-1;SNORD113-1;SNORD113-1	SNORD113-1	NR_003229;ENST00000365321;NR_003229;uc001yii.1;uc001yii.1	RefSeq;ENSEMBL;NONCODE;UCSCGenes;NONCODE	-0.0199289
767609	TC14000708.hg.1	TC14000708.hg.1	chr14	+	101455467	101455538	30	71	101455467	SNORD114-28	SNORD114-28;SNORD114-28;SNORD114-28;SNORD114-28;SNORD114-28;SNORD114-28	SNORD114-28	NR_003221;ENST00000363610;NR_003221;uc001yjs.3;uc001yjs.2	RefSeq;ENSEMBL;NONCODE;UCSCGenes;NONCODE	0.00805199
7678	TC01004066.hg.1	TC01004066.hg.1	chr1	-	247285277	247335318	216	50041	247335318	ZNF124	ZNF124;ZNF124;ZNF124;ZNF124;ZNF124;ZNF124;ZNF124;ZNF124;ZNF124;ZNF124;ZNF124;ZNF124;ZNF124	ZNF124	NM_001243740;NM_003431;ENST00000340684;ENST00000472531;ENST00000543802;AK131017;BC096349;BC096351;BC099661;OTTHUMT00000098570;OTTHUMT00000098572;OTTHUMT00000098573;OTTHUMT00000098576;OTTHUMT00000098577;uc001ich.3;uc001ici.3;uc001icj.1;uc001ick.3;ENST00000366499;ENST00000540601;OTTHUMT00000098575;OTTHUMT00000098571;uc001ich.2	RefSeq;RefSeq;ENSEMBL;ENSEMBL;ENSEMBL;GenBank;GenBank;GenBank;GenBank;Havanatranscript;Havanatranscript;Havanatranscript;Havanatranscript;Havanatranscript;UCSCGenes;UCSCGenes;UCSCGenes;UCSCGenes;ENSEMBL;ENSEMBL;Havanatranscript;Havanatranscript;NONCODE	-0.0245234
7681	TC15000040.hg.1	TC15000040.hg.1	chr15	+	23810454	23856711	69	46257	23810454	MKRN3	MKRN3;MKRN3;MKRN3;MKRN3;MKRN3	MKRN3	NM_005664;ENST00000314520;AK309383;BC044639;BC070293;OTTHUMT00000251225;uc001ywh.4;uc001ywi.3;uc010ayi.1	RefSeq;ENSEMBL;GenBankHTC;GenBank;GenBank;Havanatranscript;UCSCGenes;UCSCGenes;UCSCGenes	-0.00113162
768206	TC17002373.hg.1	TC17002373.hg.1	chr17	+	74523668	74549660	90	25992	74523668	PRCD	PRCD	PRCD	AK125617;NR_033357	NONCODE;NONCODE	0.00839431
7692	TC20000118.hg.1	TC20000118.hg.1	chr20	+	18269121	18297640	155	28519	18269121	ZNF133	ZNF133;ZNF133;ZNF133;ZNF133;ZNF133;ZNF133;ZNF133;ZNF133;ZNF133;ZNF133;ZNF133;ZNF133;ZNF133;ZNF133;ZNF133;ZNF133;ZNF133;ZNF133;ZNF133;ZNF133;ZNF133;ZNF133;ZNF133;ZNF133;ZNF133	ZNF133	NM_001083330;NM_003434;ENST00000316358;ENST00000377671;ENST00000396026;ENST00000401790;ENST00000402618;ENST00000462170;ENST00000535822;ENST00000538547;AK291389;AK294263;AK295273;AK295513;AK313525;AK316386;BC001887;OTTHUMT00000078158;OTTHUMT00000127616;OTTHUMT00000127617;OTTHUMT00000127618;OTTHUMT00000127619;OTTHUMT00000127620;uc002wql.4;uc010gcq.2;uc010gcr.2;uc010gcs.3;uc010zrv.1;uc010zrw.1;uc010…	RefSeq;RefSeq;ENSEMBL;ENSEMBL;ENSEMBL;ENSEMBL;ENSEMBL;ENSEMBL;ENSEMBL;ENSEMBL;GenBank;GenBank;GenBank;GenBank;GenBankHTC;GenBank;GenBank;Havanatranscript;Havanatranscript;Havanatranscript;Havanatranscript;Havanatranscript;Havanatranscript;UCSCGenes;UCSCGenes;UCSCGenes;UCSCGenes;UCSCGenes;UCSCGenes;UCSCGenes;UCSCGenes;GenBank;UCSCGenes	-0.0192903
7762	TC11000142.hg.1	TC11000142.hg.1	chr11	+	6947635	7005863	140	58228	6947635	ZNF215	ZNF215;ZNF215;ZNF215;ZNF215;ZNF215;ZNF215;ZNF215;ZNF215	ZNF215	NM_013250;ENST00000278319;ENST00000414517;ENST00000527171;ENST00000529903;AK298365;AK302639;BC014538;uc001mey.3;uc001mez.1;uc010rax.2;uc010raw.2	RefSeq;ENSEMBL;ENSEMBL;ENSEMBL;ENSEMBL;GenBank;GenBank;GenBank;UCSCGenes;UCSCGenes;UCSCGenes;UCSCGenes	-0.00291905
7767	TC19000616.hg.1	TC19000616.hg.1	chr19	+	44598482	44612919	92	14437	44598482	ZNF224	ZNF224;ZNF224;ZNF224	ZNF224	NM_013398;ENST00000336976;BC051902;uc002oyh.2;ENST00000269981	RefSeq;ENSEMBL;GenBank;UCSCGenes;ENSEMBL	-0.0139132
7837	TC02001512.hg.1	TC02001512.hg.1	chr2	-	1635659	1748624	482	112965	1748624	PXDN	PXDN;PXDN;PXDN;PXDN;PXDN;PXDN;PXDN;PXDN;PXDN;PXDN;PXDN;PXDN;PXDN;PXDN;PXDN;PXDN;PXDN;PXDN;PXDN	PXDN	NM_012293;ENST00000252804;ENST00000483018;BC030834;BC098579;OTTHUMT00000322505;OTTHUMT00000322506;OTTHUMT00000322507;OTTHUMT00000322508;OTTHUMT00000322510;OTTHUMT00000322511;OTTHUMT00000322512;OTTHUMT00000322513;OTTHUMT00000322514;OTTHUMT00000322515;OTTHUMT00000322516;OTTHUMT00000322517;OTTHUMT00000322518;OTTHUMT00000322519;uc002qxa.3;uc002qxb.1;uc002qxc.1	RefSeq;ENSEMBL;ENSEMBL;GenBank;GenBank;Havanatranscript;Havanatranscript;Havanatranscript;Havanatranscript;Havanatranscript;Havanatranscript;Havanatranscript;Havanatranscript;Havanatranscript;Havanatranscript;Havanatranscript;Havanatranscript;Havanatranscript;Havanatranscript;UCSCGenes;UCSCGenes;UCSCGenes	-0.0195632
7844	TC02005036.hg.1	TC02005036.hg.1	chr2	-	86830516	86851000	180	20484	86851000	RNF103	RNF103;RNF103;RNF103;RNF103;RNF103;RNF103;RNF103;RNF103;RNF103;RNF103;RNF103;RNF103;RNF103	RNF103	NM_001198951;NM_001198952;NM_005667;ENST00000237455;ENST00000477307;AK122978;BC035053;BC110333;OTTHUMT00000330039;OTTHUMT00000330040;OTTHUMT00000330041;OTTHUMT00000330079;OTTHUMT00000330080;OTTHUMT00000330082;uc002srm.3;uc002srn.3;uc002srp.3;uc021vkg.1	RefSeq;RefSeq;RefSeq;ENSEMBL;ENSEMBL;GenBank;GenBank;GenBank;Havanatranscript;Havanatranscript;Havanatranscript;Havanatranscript;Havanatranscript;Havanatranscript;UCSCGenes;UCSCGenes;UCSCGenes;UCSCGenes	0.00535301
78991	TC05000819.hg.1	TC05000819.hg.1	chr5	+	148737570	148749221	160	11651	148737570	PCYOX1L	PCYOX1L;PCYOX1L;PCYOX1L;PCYOX1L;PCYOX1L;PCYOX1L;PCYOX1L;PCYOX1L;PCYOX1L;PCYOX1L;PCYOX1L;PCYOX1L;PCYOX1L;PCYOX1L;PCYOX1L	PCYOX1L	NM_024028;ENST00000274569;ENST00000514349;AF451985;AK127281;AL834220;BC000014;OTTHUMT00000252331;OTTHUMT00000373485;OTTHUMT00000373486;OTTHUMT00000373487;OTTHUMT00000373488;OTTHUMT00000373489;OTTHUMT00000373490;uc003lqk.2;uc003lql.2;uc003lqm.2;uc003lqn.2;uc010jgz.2	RefSeq;ENSEMBL;ENSEMBL;GenBankHTC;GenBank;GenBankHTC;GenBank;Havanatranscript;Havanatranscript;Havanatranscript;Havanatranscript;Havanatranscript;Havanatranscript;Havanatranscript;UCSCGenes;UCSCGenes;UCSCGenes;UCSCGenes;UCSCGenes	-9.92e-05
78996	TC07003381.hg.1	TC07003381.hg.1	chr7	-	134777117	134832916	40	55799	134832916	C7orf49	;LOC653739;C7orf49	LOC653739;C7orf49	BC024018;OTTHUMT00000340211;ENST00000452718;uc003vsg.3	GenBank;Havanatranscript;ENSEMBL;UCSCGenes	-0.00172456
79007	TC16001361.hg.1	TC16001361.hg.1	chr16	-	90071273	90086526	80	15253	90086526	DBNDD1	DBNDD1;DBNDD1;DBNDD1;DBNDD1;DBNDD1;DBNDD1;DBNDD1;DBNDD1;DBNDD1;DBNDD1	DBNDD1	NM_001042610;NM_024043;ENST00000002501;ENST00000304733;ENST00000392973;AK308737;BC000700;OTTHUMT00000272872;OTTHUMT00000272873;uc002fqe.1;uc002fqf.1;uc002fqg.1	RefSeq;RefSeq;ENSEMBL;ENSEMBL;ENSEMBL;GenBankHTC;GenBank;Havanatranscript;Havanatranscript;UCSCGenes;UCSCGenes;UCSCGenes	0.00546253
79041	TC19000323.hg.1	TC19000323.hg.1	chr19	+	16771938	16799816	70	27878	16771938	TMEM38A	TMEM38A;TMEM38A;TMEM38A	TMEM38A	NM_024074;ENST00000187762;BC001195;uc002nes.3	RefSeq;ENSEMBL;GenBank;UCSCGenes	0.00234834
79098	TC01004979.hg.1	TC01004979.hg.1	chr1	+	207191746	207192245	30	499	207191746	C1orf116	NA	NA	AF007835	NONCODE	-0.00489639
79469	TC01004448.hg.1	TC01004448.hg.1	chr1	+	64014651	64016307	30	1656	64014651	DLEU2L	NA	NA	AF254117	NONCODE	-0.0187765
7975	TC07000023.hg.1	TC07000023.hg.1	chr7	+	1570350	1582679	100	12329	1570350	MAFK	MAFK;MAFK;MAFK;MAFK;MAFK;MAFK;MAFK	MAFK	NM_002360;ENST00000343242;ENST00000403150;AK092414;BC148265;OTTHUMT00000322712;OTTHUMT00000322713;OTTHUMT00000322714;uc003skr.3;uc003sks.1	RefSeq;ENSEMBL;ENSEMBL;GenBank;GenBank;Havanatranscript;Havanatranscript;Havanatranscript;UCSCGenes;UCSCGenes	-0.00263873
79781	TC02003909.hg.1	TC02003909.hg.1	chr2	+	237300229	237300891	30	662	237300229	IQCA1	NA	NA	BC018494	NONCODE	-0.0078636
79834	TC15001691.hg.1	TC15001691.hg.1	chr15	-	77400471	77712464	184	311993	77712464	PEAK1	AX747193;PEAK1;PEAK1;PEAK1;PEAK1;PEAK1;PEAK1;PEAK1	AX747193;PEAK1	NM_024776;ENST00000312493;ENST00000558305;ENST00000559791;ENST00000560626;AK074157;uc002bcn.2;uc021sqy.1;uc021sqz.1	RefSeq;ENSEMBL;ENSEMBL;ENSEMBL;ENSEMBL;GenBank;UCSCGenes;UCSCGenes;UCSCGenes	-0.0134469
7984	TC07000957.hg.1	TC07000957.hg.1	chr7	+	144052381	144077725	258	25344	144052381	ARHGEF5	ARHGEF5;ARHGEF5;ARHGEF5;ARHGEF5;ARHGEF5;ARHGEF5;ARHGEF5;ARHGEF5	ARHGEF5	NM_005435;ENST00000056217;ENST00000471847;BC136661;CR749203;OTTHUMT00000349981;OTTHUMT00000349982;OTTHUMT00000349984;uc003wek.3;uc003wel.3;ENST00000344879;OTTHUMT00000349983;uc003wem.3	RefSeq;ENSEMBL;ENSEMBL;GenBank;GenBankHTC;Havanatranscript;Havanatranscript;Havanatranscript;UCSCGenes;UCSCGenes;ENSEMBL;Havanatranscript;UCSCGenes	0.0135779
79961	TC01002981.hg.1	TC01002981.hg.1	chr1	-	111729796	111747157	256	17361	111747157	DENND2D	DENND2D;DENND2D;DENND2D;DENND2D;DENND2D;DENND2D;DENND2D;DENND2D;DENND2D;DENND2D;DENND2D;DENND2D	DENND2D	NM_024901;ENST00000357640;ENST00000369752;ENST00000473682;AK026110;BC004557;OTTHUMT00000034455;OTTHUMT00000034456;OTTHUMT00000034457;OTTHUMT00000034458;OTTHUMT00000034459;OTTHUMT00000034460;OTTHUMT00000034461;OTTHUMT00000098105;uc001eak.1;uc001eal.1	RefSeq;ENSEMBL;ENSEMBL;ENSEMBL;GenBank;GenBank;Havanatranscript;Havanatranscript;Havanatranscript;Havanatranscript;Havanatranscript;Havanatranscript;Havanatranscript;Havanatranscript;UCSCGenes;UCSCGenes	-1.51e-05
80055	TC02002644.hg.1	TC02002644.hg.1	chr2	-	197697728	197792520	411	94792	197792520	PGAP1	PGAP1;PGAP1;PGAP1;PGAP1;PGAP1;PGAP1;PGAP1;PGAP1;PGAP1;PGAP1;PGAP1;PGAP1;PGAP1;PGAP1;PGAP1;PGAP1;PGAP1;PGAP1;PGAP1;PGAP1;PGAP1;PGAP1	PGAP1	NM_024989;ENST00000354764;ENST00000409188;ENST00000409475;ENST00000485830;AK022439;AK124764;AK302663;AK310484;BX648642;OTTHUMT00000256103;OTTHUMT00000335026;OTTHUMT00000335027;OTTHUMT00000335028;OTTHUMT00000335104;OTTHUMT00000335105;OTTHUMT00000335106;OTTHUMT00000335107;OTTHUMT00000335108;OTTHUMT00000335109;OTTHUMT00000335110;uc002utw.3;uc002utx.3;uc002uty.1;uc010fsi.3;uc010fsj.2;uc010zgv.1;ENST0…	RefSeq;ENSEMBL;ENSEMBL;ENSEMBL;ENSEMBL;GenBank;GenBank;GenBank;GenBankHTC;GenBankHTC;Havanatranscript;Havanatranscript;Havanatranscript;Havanatranscript;Havanatranscript;Havanatranscript;Havanatranscript;Havanatranscript;Havanatranscript;Havanatranscript;Havanatranscript;UCSCGenes;UCSCGenes;UCSCGenes;UCSCGenes;UCSCGenes;UCSCGenes;ENSEMBL	-0.0118428
80094	TC08001043.hg.1	TC08001043.hg.1	chr8	-	22497882	22499722	30	1840	22499722	BIN3-IT1	FLJ14107;FLJ14107	FLJ14107	NR_027715;BC013100;uc011kzm.1;uc011kzm.1	RefSeq;GenBank;UCSCGenes;NONCODE	0.00652605
80114	TC10000362.hg.1	TC10000362.hg.1	chr10	+	60272897	60591195	260	318298	60272897	BICC1	BICC1;BICC1;BICC1;BICC1;BICC1;BICC1;BICC1;BICC1	BICC1	NM_001080512;ENST00000263103;ENST00000373886;ENST00000476684;AK225429;OTTHUMT00000048149;OTTHUMT00000048150;OTTHUMT00000048151;uc001jki.1;uc001jkj.1	RefSeq;ENSEMBL;ENSEMBL;ENSEMBL;GenBank;Havanatranscript;Havanatranscript;Havanatranscript;UCSCGenes;UCSCGenes	-0.000250559
80122	TC02002370.hg.1	TC02002370.hg.1	chr2	-	135737998	135739222	30	1224	135739222	MAP3K19	MAP3K19;MAP3K19;MAP3K19	MAP3K19	NM_001018046;AK225579;uc002tuh.4;uc021vpz.1	RefSeq;GenBank;UCSCGenes;UCSCGenes	-0.000355557
80305	TC22000420.hg.1	TC22000420.hg.1	chr22	+	50624344	50638027	204	13683	50624344	TRABD	TRABD;TRABD;TRABD;TRABD;TRABD;TRABD;TRABD;TRABD;TRABD;TRABD;TRABD;TRABD	TRABD	NM_025204;ENST00000303434;ENST00000380909;ENST00000395827;ENST00000395829;BC012445;BC093029;OTTHUMT00000075002;OTTHUMT00000316987;OTTHUMT00000316988;OTTHUMT00000316989;OTTHUMT00000316990;OTTHUMT00000316991;uc003bjr.2;uc003bjs.1	RefSeq;ENSEMBL;ENSEMBL;ENSEMBL;ENSEMBL;GenBank;GenBank;Havanatranscript;Havanatranscript;Havanatranscript;Havanatranscript;Havanatranscript;Havanatranscript;UCSCGenes;UCSCGenes	0.000829279
80326	TC02001314.hg.1	TC02001314.hg.1	chr2	+	219745085	219764303	110	19218	219745085	WNT10A	WNT10A;WNT10A;WNT10A;WNT10A;WNT10A;WNT10A;WNT10A	WNT10A	NM_025216;ENST00000258411;ENST00000483911;BC052234;OTTHUMT00000256730;OTTHUMT00000336519;OTTHUMT00000336520;OTTHUMT00000336521;uc002vjd.1	RefSeq;ENSEMBL;ENSEMBL;GenBank;Havanatranscript;Havanatranscript;Havanatranscript;Havanatranscript;UCSCGenes	0.0302659
8087	TC03002679.hg.1	TC03002679.hg.1	chr3	+	180630453	180653017	30	22564	180630453	FXR1	NA	NA	BC010382	NONCODE	-0.0851046
81029	TC12000017.hg.1	TC12000017.hg.1	chr12	+	1683823	1756409	146	72586	1683823	WNT5B	WNT5B;WNT5B;WNT5B;WNT5B;WNT5B;WNT5B;WNT5B;WNT5B;WNT5B;WNT5B;WNT5B;WNT5B	WNT5B	NM_030775;NM_032642;ENST00000310594;ENST00000397196;ENST00000537031;ENST00000542408;ENST00000545747;AB209228;AK290430;BC001749;OTTHUMT00000206747;uc001qjj.3;uc001qjk.3;uc001qjl.3;uc009zdq.3	RefSeq;RefSeq;ENSEMBL;ENSEMBL;ENSEMBL;ENSEMBL;ENSEMBL;GenBank;GenBank;GenBank;Havanatranscript;UCSCGenes;UCSCGenes;UCSCGenes;UCSCGenes	0.00805113
81341	TC11001805.hg.1	TC11001805.hg.1	chr11	-	58034264	58035732	30	1468	58035732	OR10W1	OR10W1;OR10W1;OR10W1	OR10W1	NM_207374;ENST00000395079;BC132848;uc001nmq.1	RefSeq;ENSEMBL;GenBank;UCSCGenes	0.00723243
81554	TC07000467.hg.1	TC07000467.hg.1	chr7	+	74765876	74789332	80	23456	74765876	WBSCR16	;WBSCR16	WBSCR16	NM_030798;BC157844;uc010lck.3;ENST00000420642	RefSeq;GenBank;UCSCGenes;ENSEMBL	-0.00113538
81609	TC01003230.hg.1	TC01003230.hg.1	chr1	-	151670319	151670850	30	531	151670850	SNX27	BC127854	BC127854	BC127854;uc001eyq.1	GenBank;UCSCGenes	0.0194875
81698	TC15001692.hg.1	TC15001692.hg.1	chr15	-	77516250	77517746	30	1496	77517746	LINC00597	LINC00597	LINC00597	NR_026813;uc002bcp.4;uc002bcp.3	RefSeq;UCSCGenes;NONCODE	-0.000966195
81790	TC08002309.hg.1	TC08002309.hg.1	chr8	-	42708438	42751866	70	43428	42751866	RNF170	NA	NA	NR_027668;NR_027669	NONCODE;NONCODE	-0.0150778
81851	TC17001482.hg.1	TC17001482.hg.1	chr17	-	39196811	39197713	30	902	39197713	KRTAP1-1	KRTAP1-1;KRTAP1-1;KRTAP1-1	KRTAP1-1	NM_030967;ENST00000306271;BC105069;OTTHUMT00000257696;uc002hvw.1	RefSeq;ENSEMBL;GenBank;Havanatranscript;UCSCGenes	0.0184936
81871	TC17002625.hg.1	TC17002625.hg.1	chr17	-	39295685	39296703	30	1018	39296703	KRTAP4-6	NA	NA	AJ406945	NONCODE	-0.000129101
83463	TC05003437.hg.1	TC05003437.hg.1	chr5	-	176732501	176739758	162	7257	176739758	MXD3	MXD3;MXD3;MXD3;MXD3;MXD3;MXD3;MXD3;MXD3;MXD3;MXD3;MXD3;MXD3;MXD3;MXD3;MXD3;MXD3;MXD3	MXD3	NM_001142935;NM_031300;ENST00000423571;ENST00000427908;ENST00000439742;ENST00000513063;AF114834;BC000745;BC032586;OTTHUMT00000253427;OTTHUMT00000372701;OTTHUMT00000372702;OTTHUMT00000372703;OTTHUMT00000372705;OTTHUMT00000372707;OTTHUMT00000372708;uc003mga.3;uc003mgb.2;uc010jkk.2;uc021yir.1;ENST00000303165	RefSeq;RefSeq;ENSEMBL;ENSEMBL;ENSEMBL;ENSEMBL;GenBank;GenBank;GenBank;Havanatranscript;Havanatranscript;Havanatranscript;Havanatranscript;Havanatranscript;Havanatranscript;Havanatranscript;UCSCGenes;UCSCGenes;UCSCGenes;UCSCGenes;ENSEMBL	-0.00210969
83857	TC12001350.hg.1	TC12001350.hg.1	chr12	-	29653746	29937692	329	283946	29937692	TMTC1	TMTC1;TMTC1;TMTC1;TMTC1;TMTC1;TMTC1;TMTC1;TMTC1;TMTC1;TMTC1;TMTC1;TMTC1;TMTC1;TMTC1	TMTC1	NM_001193451;NM_175861;ENST00000256062;ENST00000319685;ENST00000539277;ENST00000551659;ENST00000552618;AK055962;AK123619;AK127297;BC028716;BC042083;uc001riy.3;uc001riz.3;uc001rja.3;uc001rjb.3;uc001rjc.1;uc021qwi.1;ENST00000381224;ENST00000540901	RefSeq;RefSeq;ENSEMBL;ENSEMBL;ENSEMBL;ENSEMBL;ENSEMBL;GenBank;GenBank;GenBank;GenBank;GenBank;UCSCGenes;UCSCGenes;UCSCGenes;UCSCGenes;UCSCGenes;UCSCGenes;ENSEMBL;ENSEMBL	0.0344141
8399	TC16000885.hg.1	TC16000885.hg.1	chr16	-	14766402	14827644	86	61242	14827644	PLA2G10	PLA2G10;PLA2G10;PLA2G10	PLA2G10	NM_003561;ENST00000438167;BC069539;BC106731;OTTHUMT00000109393;uc002dcq.3;ENST00000261659	RefSeq;ENSEMBL;GenBank;GenBank;Havanatranscript;UCSCGenes;ENSEMBL	-0.00170723
84062	TC06001290.hg.1	TC06001290.hg.1	chr6	-	15523032	15663289	195	140257	15663289	DTNBP1	DTNBP1;DTNBP1;DTNBP1;DTNBP1;DTNBP1;DTNBP1;DTNBP1;DTNBP1;DTNBP1;DTNBP1;DTNBP1;DTNBP1;DTNBP1;DTNBP1;DTNBP1;DTNBP1;DTNBP1;DTNBP1;DTNBP1;DTNBP1;DTNBP1	DTNBP1	NM_032122;NM_183040;NR_036448;ENST00000338950;ENST00000344537;ENST00000355917;ENST00000462989;ENST00000511762;AK054593;BC011912;NR_036448;OTTHUMT00000039933;OTTHUMT00000039934;OTTHUMT00000039935;OTTHUMT00000367679;OTTHUMT00000367680;OTTHUMT00000367681;OTTHUMT00000367712;OTTHUMT00000367713;OTTHUMT00000367714;OTTHUMT00000367715;uc003nbl.3;uc003nbm.3;uc003nbp.3;uc010jph.3;ENST00000397306;ENST0000054…	RefSeq;RefSeq;RefSeq;ENSEMBL;ENSEMBL;ENSEMBL;ENSEMBL;ENSEMBL;GenBank;GenBank;NONCODE;Havanatranscript;Havanatranscript;Havanatranscript;Havanatranscript;Havanatranscript;Havanatranscript;Havanatranscript;Havanatranscript;Havanatranscript;Havanatranscript;UCSCGenes;UCSCGenes;UCSCGenes;UCSCGenes;ENSEMBL;ENSEMBL	0.0133048
84176	TC07002481.hg.1	TC07002481.hg.1	chr7	+	98870924	98895594	180	24670	98870924	MYH16	MYH16	MYH16	NR_002147;linc_luo_1385;linc_luo_1869;linc_luo_1871	NONCODE;NONCODE;NONCODE;NONCODE	-0.012395
84217	TC01002572.hg.1	TC01002572.hg.1	chr1	-	42896000	42921938	120	25938	42921938	ZMYND12	ZMYND12;ZMYND12;ZMYND12;ZMYND12;ZMYND12;ZMYND12;ZMYND12;ZMYND12;ZMYND12;ZMYND12	ZMYND12	NM_001146192;NM_032257;ENST00000372565;ENST00000475426;BC024186;OTTHUMT00000019170;OTTHUMT00000019171;OTTHUMT00000019172;uc001chj.3;uc010ojt.2;ENST00000433602	RefSeq;RefSeq;ENSEMBL;ENSEMBL;GenBank;Havanatranscript;Havanatranscript;Havanatranscript;UCSCGenes;UCSCGenes;ENSEMBL	0.00380196
8424	TC11002605.hg.1	TC11002605.hg.1	chr11	+	27062923	27077059	30	14136	27062923	BBOX1	NA	NA	DQ471856;DQ471865	NONCODE;NONCODE	-0.00363777
84259	TC11002240.hg.1	TC11002240.hg.1	chr11	-	102921413	102962944	122	41531	102962944	DCUN1D5	DCUN1D5;DCUN1D5;DCUN1D5;DCUN1D5;DCUN1D5;DCUN1D5	DCUN1D5	NM_032299;ENST00000260247;ENST00000529076;ENST00000531543;AK298227;BC004169;uc001phm.3;uc010ruw.2	RefSeq;ENSEMBL;ENSEMBL;ENSEMBL;GenBank;GenBank;UCSCGenes;UCSCGenes	-0.000979673
84277	TC07001503.hg.1	TC07001503.hg.1	chr7	-	73095248	73097783	54	2535	73097783	DNAJC30	DNAJC30;DNAJC30;DNAJC30	DNAJC30	NM_032317;ENST00000395176;BC005056;OTTHUMT00000252304;uc003tys.1;ENST00000539255	RefSeq;ENSEMBL;GenBank;Havanatranscript;UCSCGenes;ENSEMBL	0.00852745
84451	TC01001927.hg.1	TC01001927.hg.1	chr1	+	233463514	233520894	140	57380	233463514	KIAA1804	;KIAA1804;KIAA1804;;KIAA1804;;;;	KIAA1804	NM_032435;ENST00000366622;ENST00000366623;ENST00000366624;AB058707;AJ311797;BC136648;uc001hvs.1;uc001hvt.4;uc001hvu.4;OTTHUMT00000092495;OTTHUMT00000092496;OTTHUMT00000092497	RefSeq;ENSEMBL;ENSEMBL;ENSEMBL;GenBank;GenBank;GenBank;UCSCGenes;UCSCGenes;UCSCGenes;Havanatranscript;Havanatranscript;Havanatranscript	0.013718
8460	TC07000405.hg.1	TC07000405.hg.1	chr7	+	65670186	65885530	149	215344	65670186	TPST1	TPST1;TPST1;TPST1;TPST1;TPST1;TPST1;TPST1;TPST1;TPST1	TPST1	NM_003596;ENST00000304842;ENST00000480281;AK307053;BC013188;OTTHUMT00000251705;OTTHUMT00000345607;OTTHUMT00000345608;OTTHUMT00000345609;OTTHUMT00000345610;uc003tuw.3;uc010kzy.2;ENST00000544114	RefSeq;ENSEMBL;ENSEMBL;GenBankHTC;GenBank;Havanatranscript;Havanatranscript;Havanatranscript;Havanatranscript;Havanatranscript;UCSCGenes;UCSCGenes;ENSEMBL	0.00431052
84620	TC02002174.hg.1	TC02002174.hg.1	chr2	-	107418056	107503564	150	85508	107503564	ST6GAL2	ST6GAL2;ST6GAL2;ST6GAL2;ST6GAL2;ST6GAL2;ST6GAL2;ST6GAL2;ST6GAL2;ST6GAL2;ST6GAL2;ST6GAL2;ST6GAL2;ST6GAL2;ST6GAL2	ST6GAL2	NM_001142351;NM_001142352;NM_032528;ENST00000361686;ENST00000409087;ENST00000409382;BC008680;OTTHUMT00000253517;OTTHUMT00000330064;OTTHUMT00000330065;OTTHUMT00000330066;OTTHUMT00000330067;uc002tdq.3;uc002tdr.3;uc002tds.3	RefSeq;RefSeq;RefSeq;ENSEMBL;ENSEMBL;ENSEMBL;GenBank;Havanatranscript;Havanatranscript;Havanatranscript;Havanatranscript;Havanatranscript;UCSCGenes;UCSCGenes;UCSCGenes	-0.00143895
84627	TC16000678.hg.1	TC16000678.hg.1	chr16	+	88493879	88507165	30	13286	88493879	ZNF469	ZNF469;ZNF469;ZNF469	ZNF469	NM_001127464;ENST00000437464;uc002fku.2	RefSeq;ENSEMBL;UCSCGenes	0.000591223
84662	TC16000128.hg.1	TC16000128.hg.1	chr16	+	4364762	4389598	100	24836	4364762	GLIS2	GLIS2;GLIS2;GLIS2;GLIS2;GLIS2	GLIS2	NM_032575;ENST00000262366;ENST00000433375;OTTHUMT00000251630;uc002cwc.1	RefSeq;ENSEMBL;ENSEMBL;Havanatranscript;UCSCGenes	0.000854663
84765	TC19001788.hg.1	TC19001788.hg.1	chr19	-	52359055	52394203	246	35148	52394203	ZNF577	ZNF577;ZNF577;ZNF577;ZNF577;ZNF577;ZNF577;ZNF577;ZNF577;ZNF577;ZNF577;ZNF577;ZNF577;ZNF577;ZNF577;ZNF577;ZNF577;ZNF577;ZNF577;ZNF577;ZNF577;ZNF577;ZNF577;ZNF577	ZNF577	NM_001135590;NM_032679;NR_024181;ENST00000301399;ENST00000412216;ENST00000420592;ENST00000451628;ENST00000485702;AL832871;BC004992;BC030610;FJ423743;NR_024181;OTTHUMT00000347243;OTTHUMT00000347244;OTTHUMT00000347245;OTTHUMT00000347246;OTTHUMT00000347247;OTTHUMT00000347249;OTTHUMT00000347250;OTTHUMT00000347251;OTTHUMT00000347252;OTTHUMT00000347253;OTTHUMT00000347254;uc002pxv.3;uc002pxw.3;uc002pxx.…	RefSeq;RefSeq;RefSeq;ENSEMBL;ENSEMBL;ENSEMBL;ENSEMBL;ENSEMBL;GenBank;GenBank;GenBankHTC;GenBank;NONCODE;Havanatranscript;Havanatranscript;Havanatranscript;Havanatranscript;Havanatranscript;Havanatranscript;Havanatranscript;Havanatranscript;Havanatranscript;Havanatranscript;Havanatranscript;UCSCGenes;UCSCGenes;UCSCGenes;UCSCGenes;UCSCGenes;UCSCGenes	-0.00818863
84789	TC03001064.hg.1	TC03001064.hg.1	chr3	+	192959568	192961761	30	2193	192959568	MGC2889	MGC2889	MGC2889	NR_026877;uc003ftb.3	RefSeq;UCSCGenes	0.00875043
8484	TC22000290.hg.1	TC22000290.hg.1	chr22	+	38219389	38221502	30	2113	38219389	GALR3	GALR3;GALR3;GALR3	GALR3	NM_003614;ENST00000249041;OTTHUMT00000319452;uc003aub.1	RefSeq;ENSEMBL;Havanatranscript;UCSCGenes	0.000235902
84878	TC19001921.hg.1	TC19001921.hg.1	chr19	-	59024897	59031188	40	6291	59031188	ZBTB45	ZBTB45;ZBTB45;ZBTB45;ZBTB45	ZBTB45	NM_032792;ENST00000354590;AK027392;BC024738;uc002qtd.3;uc002qtf.3	RefSeq;ENSEMBL;GenBank;GenBank;UCSCGenes;UCSCGenes	0.0061373
84954	TC19000087.hg.1	TC19000087.hg.1	chr19	+	4343524	4360083	140	16559	4343524	MPND	MPND;MPND;MPND;MPND;MPND;MPND;MPND	MPND	NM_001159846;NM_032868;ENST00000262966;ENST00000359935;AK308468;BC032652;uc002mae.3;uc002mag.3;uc010dtx.2	RefSeq;RefSeq;ENSEMBL;ENSEMBL;GenBankHTC;GenBank;UCSCGenes;UCSCGenes;UCSCGenes	0.0099481
84969	TC20000323.hg.1	TC20000323.hg.1	chr20	+	42543492	42698256	152	154764	42543492	TOX2	TOX2;TOX2;TOX2;TOX2;TOX2;TOX2;TOX2;TOX2;TOX2;TOX2;TOX2;TOX2;TOX2;TOX2;TOX2;TOX2;TOX2;TOX2	TOX2	NM_001098796;NM_001098797;NM_001098798;NM_032883;ENST00000341197;ENST00000358131;ENST00000372999;ENST00000423191;ENST00000435864;AK298976;uc002xle.4;uc002xlf.4;uc010ggo.3;uc010ggp.3;uc010zwk.2;ENST00000372992;OTTHUMT00000079329;OTTHUMT00000079330;OTTHUMT00000079331;OTTHUMT00000079332	RefSeq;RefSeq;RefSeq;RefSeq;ENSEMBL;ENSEMBL;ENSEMBL;ENSEMBL;ENSEMBL;GenBank;UCSCGenes;UCSCGenes;UCSCGenes;UCSCGenes;UCSCGenes;ENSEMBL;Havanatranscript;Havanatranscript;Havanatranscript;Havanatranscript	-6.23e-05
84984	TC03002165.hg.1	TC03002165.hg.1	chr3	-	196433148	196439164	50	6016	196439164	CEP19	CEP19;CEP19;CEP19;CEP19;CEP19	CEP19	NM_032898;ENST00000399942;ENST00000409690;BC007827;OTTHUMT00000333080;OTTHUMT00000333081;uc011btw.2	RefSeq;ENSEMBL;ENSEMBL;GenBank;Havanatranscript;Havanatranscript;UCSCGenes	-0.00129676
85379	TC22000159.hg.1	TC22000159.hg.1	chr22	+	25421600	25593415	216	171815	25421600	KIAA1671	KIAA1671;KIAA1671;KIAA1671;KIAA1671;KIAA1671;KIAA1671;KIAA1671;KIAA1671;KIAA1671;KIAA1671	KIAA1671	NM_001145206;ENST00000358431;ENST00000401395;ENST00000406486;AB051458;BC171801;OTTHUMT00000320305;OTTHUMT00000320306;OTTHUMT00000320307;OTTHUMT00000320484;uc003abl.3;uc003abn.3	RefSeq;ENSEMBL;ENSEMBL;ENSEMBL;GenBank;GenBank;Havanatranscript;Havanatranscript;Havanatranscript;Havanatranscript;UCSCGenes;UCSCGenes	-5.82e-05
85455	TC15000282.hg.1	TC15000282.hg.1	chr15	+	40664026	40664677	30	651	40664026	DISP2	LINC00594	LINC00594	ENST00000561261	ENSEMBL	0.00835809
8645	TC06001696.hg.1	TC06001696.hg.1	chr6	-	39156747	39197251	70	40504	39197251	KCNK5	KCNK5;KCNK5;KCNK5	KCNK5	NM_003740;ENST00000359534;BC060793;BC069573;OTTHUMT00000040449;uc003oon.3	RefSeq;ENSEMBL;GenBank;GenBank;Havanatranscript;UCSCGenes	0.000263704
8717	TC16001180.hg.1	TC16001180.hg.1	chr16	-	67188083	67193812	80	5729	67193812	TRADD	TRADD;TRADD;TRADD;TRADD;TRADD;TRADD;TRADD	TRADD	NM_003789;ENST00000345057;AK090673;AK301593;BC004491;OTTHUMT00000268841;OTTHUMT00000268842;uc002erh.1;uc002eri.1;uc010vjb.1	RefSeq;ENSEMBL;GenBank;GenBank;GenBank;Havanatranscript;Havanatranscript;UCSCGenes;UCSCGenes;UCSCGenes	0.000795643
8820	TC03001490.hg.1	TC03001490.hg.1	chr3	-	57231944	57260540	100	28596	57260540	HESX1	HESX1;HESX1;HESX1;HESX1;HESX1	HESX1	NM_003865;ENST00000295934;ENST00000473921;BC069515;BC093979;OTTHUMT00000351430;OTTHUMT00000351431;uc003din.4	RefSeq;ENSEMBL;ENSEMBL;GenBank;GenBank;Havanatranscript;Havanatranscript;UCSCGenes	-0.00784397
8821	TC04001600.hg.1	TC04001600.hg.1	chr4	-	142944313	143768585	616	824272	143768585	INPP4B	INPP4B;INPP4B;INPP4B;INPP4B;INPP4B;INPP4B;INPP4B;INPP4B;INPP4B;INPP4B;INPP4B;INPP4B;INPP4B;INPP4B;INPP4B;INPP4B;INPP4B;INPP4B;INPP4B;INPP4B;INPP4B;INPP4B;INPP4B;INPP4B;INPP4B;INPP4B;INPP4B;INPP4B;INPP4B;INPP4B;INPP4B;INPP4B;INPP4B;INPP4B;INPP4B;INPP4B;INPP4B;INPP4B	INPP4B	NM_001101669;NM_003866;ENST00000262992;ENST00000506217;ENST00000507861;ENST00000508084;ENST00000508116;ENST00000509777;ENST00000513000;AK298118;AK300891;AK302936;BC005273;BC110918;BC133005;BC144255;OTTHUMT00000364587;OTTHUMT00000364588;OTTHUMT00000364589;OTTHUMT00000364590;OTTHUMT00000364591;OTTHUMT00000364592;OTTHUMT00000364593;OTTHUMT00000364594;OTTHUMT00000364595;OTTHUMT00000364596;OTTHUMT0000…	RefSeq;RefSeq;ENSEMBL;ENSEMBL;ENSEMBL;ENSEMBL;ENSEMBL;ENSEMBL;ENSEMBL;GenBank;GenBank;GenBank;GenBank;GenBank;GenBank;GenBank;Havanatranscript;Havanatranscript;Havanatranscript;Havanatranscript;Havanatranscript;Havanatranscript;Havanatranscript;Havanatranscript;Havanatranscript;Havanatranscript;Havanatranscript;Havanatranscript;Havanatranscript;Havanatranscript;Havanatranscript;Havanatranscript;H…	0.0555333
8857	TC19001527.hg.1	TC19001527.hg.1	chr19	-	40353963	40440533	360	86570	40440533	FCGBP	FCGBP;FCGBP	FCGBP	NM_003890;uc002omp.4	RefSeq;UCSCGenes	0.0155203
8857	TC19002479.hg.1	TC19002479.hg.1	chr19	-	40353971	40440533	360	86562	40440533	FCGBP	NA	NA	D84239	NONCODE	0.00564809
8858	TC13000418.hg.1	TC13000418.hg.1	chr13	+	113812968	113826698	146	13730	113812968	PROZ	PROZ;PROZ;PROZ;PROZ;PROZ;PROZ;PROZ	PROZ	NM_001256134;NM_003891;ENST00000342783;ENST00000375547;BC074906;M55671;OTTHUMT00000045845;OTTHUMT00000045846;OTTHUMT00000045847;ENST00000497607;OTTHUMT00000045848;uc001vta.1;uc010agr.1	RefSeq;RefSeq;ENSEMBL;ENSEMBL;GenBank;GenBank;Havanatranscript;Havanatranscript;Havanatranscript;ENSEMBL;Havanatranscript;UCSCGenes;UCSCGenes	0.00593451
89883	TC07001967.hg.1	TC07001967.hg.1	chr7	-	142759381	142760882	30	1501	142760882	OR6W1P	OR6W1P;OR6W1P;OR6W1P;OR6W1P	OR6W1P	NR_002140;NR_002140;uc003wce.1;ENST00000496192	RefSeq;NONCODE;UCSCGenes;ENSEMBL	0.0110106
90011	TC19002233.hg.1	TC19002233.hg.1	chr19	+	55043909	55055195	90	11286	55043909	KIR3DX1	NA	NA	NR_026716	NONCODE	-0.0148103
90139	TC11000375.hg.1	TC11000375.hg.1	chr11	+	44748662	44953977	240	205315	44748662	TSPAN18	TSPAN18;TSPAN18;TSPAN18;TSPAN18;TSPAN18;TSPAN18;TSPAN18;TSPAN18;TSPAN18;TSPAN18;TSPAN18;TSPAN18;TSPAN18;TSPAN18	TSPAN18	NM_130783;ENST00000340160;ENST00000520358;BC019342;OTTHUMT00000376197;OTTHUMT00000376227;OTTHUMT00000376228;OTTHUMT00000376229;OTTHUMT00000376230;OTTHUMT00000376231;OTTHUMT00000376232;OTTHUMT00000376233;OTTHUMT00000376234;uc001mye.4;uc001myg.3	RefSeq;ENSEMBL;ENSEMBL;GenBank;Havanatranscript;Havanatranscript;Havanatranscript;Havanatranscript;Havanatranscript;Havanatranscript;Havanatranscript;Havanatranscript;Havanatranscript;UCSCGenes;UCSCGenes	0.000832368
90139	TC11002647.hg.1	TC11002647.hg.1	chr11	+	44951562	44953972	30	2410	44951562	TSPAN18	NA	NA	AK027515	NONCODE	0.0115936
90625	TC21000498.hg.1	TC21000498.hg.1	chr21	-	44336913	44345756	24	8843	44345756	ERVH48-1	HERV-Fb1;ERVH48-1	HERV-Fb1;ERVH48-1	BC005107;ENST00000447535;OTTHUMT00000195540;uc002zco.3	GenBank;ENSEMBL;Havanatranscript;UCSCGenes	-0.0137321
91252	TC11000407.hg.1	TC11000407.hg.1	chr11	+	47377001	47438051	277	61050	47377001	SLC39A13	SLC39A13;SLC39A13;SLC39A13;SLC39A13;SLC39A13;SLC39A13;SLC39A13;SLC39A13;SLC39A13;SLC39A13;SLC39A13;SLC39A13;SLC39A13;SLC39A13	SLC39A13	NM_001128225;NM_152264;ENST00000354884;ENST00000362021;ENST00000524928;ENST00000529740;ENST00000531419;ENST00000531865;ENST00000531974;ENST00000533076;AK098651;BC008853;BC019016;BX647491;uc001nfd.3;uc001nfe.1;uc001nff.4;uc009ylq.3	RefSeq;RefSeq;ENSEMBL;ENSEMBL;ENSEMBL;ENSEMBL;ENSEMBL;ENSEMBL;ENSEMBL;ENSEMBL;GenBank;GenBank;GenBank;GenBank;UCSCGenes;UCSCGenes;UCSCGenes;UCSCGenes	-0.000841757
91272	TC05002077.hg.1	TC05002077.hg.1	chr5	-	173034148	173043666	150	9518	173043666	BOD1	BOD1;BOD1;BOD1;BOD1;BOD1;BOD1;BOD1;BOD1;BOD1;BOD1;BOD1;BOD1;BOD1;BOD1;BOD1	BOD1	NM_001159651;NM_138369;ENST00000285908;ENST00000311086;ENST00000471339;ENST00000480951;BC003114;BC007436;OTTHUMT00000252963;OTTHUMT00000351715;OTTHUMT00000351716;OTTHUMT00000351717;OTTHUMT00000351718;OTTHUMT00000351719;OTTHUMT00000376472;uc003mcq.2;uc003mcr.2	RefSeq;RefSeq;ENSEMBL;ENSEMBL;ENSEMBL;ENSEMBL;GenBank;GenBank;Havanatranscript;Havanatranscript;Havanatranscript;Havanatranscript;Havanatranscript;Havanatranscript;Havanatranscript;UCSCGenes;UCSCGenes	-0.00055706
91419	TC12000547.hg.1	TC12000547.hg.1	chr12	+	58335360	58351052	100	15692	58335360	XRCC6BP1	XRCC6BP1;XRCC6BP1;XRCC6BP1;XRCC6BP1	XRCC6BP1	NM_033276;ENST00000300145;ENST00000546709;BC012776;BC115381;BC115382;uc001sqp.3	RefSeq;ENSEMBL;ENSEMBL;GenBank;GenBank;GenBank;UCSCGenes	-0.0138196
9150	TC18000264.hg.1	TC18000264.hg.1	chr18	+	77439801	77514510	150	74709	77439801	CTDP1	CTDP1;CTDP1;CTDP1;CTDP1;CTDP1;CTDP1;CTDP1;CTDP1;CTDP1;CTDP1;CTDP1	CTDP1	NM_001202504;NM_004715;NM_048368;ENST00000075430;ENST00000299543;BC032515;BC063447;OTTHUMT00000256432;OTTHUMT00000256433;uc002lnh.2;uc002lni.2;uc010drd.2;uc021ult.1	RefSeq;RefSeq;RefSeq;ENSEMBL;ENSEMBL;GenBank;GenBank;Havanatranscript;Havanatranscript;UCSCGenes;UCSCGenes;UCSCGenes;UCSCGenes	-0.00384199
91584	TC07001877.hg.1	TC07001877.hg.1	chr7	-	131808091	132333447	400	525356	132333447	PLXNA4	PLXNA4;PLXNA4;PLXNA4;PLXNA4;PLXNA4;PLXNA4;PLXNA4;PLXNA4;PLXNA4;PLXNA4;PLXNA4;PLXNA4;PLXNA4;PLXNA4;PLXNA4	PLXNA4	NM_001105543;NM_020911;NM_181775;ENST00000321063;ENST00000359827;ENST00000378539;ENST00000423507;OTTHUMT00000338422;OTTHUMT00000338495;OTTHUMT00000338496;OTTHUMT00000338497;uc003vra.4;uc003vrb.3;uc003vrc.2;uc003vqz.4	RefSeq;RefSeq;RefSeq;ENSEMBL;ENSEMBL;ENSEMBL;ENSEMBL;Havanatranscript;Havanatranscript;Havanatranscript;Havanatranscript;UCSCGenes;UCSCGenes;UCSCGenes;UCSCGenes	0.0133555
91647	TC17001197.hg.1	TC17001197.hg.1	chr17	-	17929386	17930083	30	697	17930083	ATPAF2	BC150162	BC150162	BC150162;uc010cps.1	GenBank;UCSCGenes	0.000162533
91703	TC11001994.hg.1	TC11001994.hg.1	chr11	-	67410026	67418130	100	8104	67418130	ACY3	ACY3;ACY3;ACY3;ACY3	ACY3	NM_080658;ENST00000255082;ENST00000529256;BC008689;uc001omq.3	RefSeq;ENSEMBL;ENSEMBL;GenBank;UCSCGenes	0.0168594
92105	TC07000392.hg.1	TC07000392.hg.1	chr7	+	64673116	64673146	7	30	64673116	INTS4	DQ596928;DQ596928	DQ596928	DQ596928;DQ596928;uc003tty.1;uc003tty.1	NONCODE;GenBank;UCSCGenes;NONCODE	0.00913742
93164	TC12000186.hg.1	TC12000186.hg.1	chr12	+	13153354	13193613	66	40259	13153354	HTR7P1	HTR7P1;;AK125676;HTR7P1	HTR7P1;AK125676	NR_002774;uc010shq.2;ENST00000535469;ENST00000543321;AK125676;AK125676;uc001rbh.2;uc001rbh.3;uc010shq.1	RefSeq;UCSCGenes;ENSEMBL;ENSEMBL;NONCODE;GenBank;NONCODE;UCSCGenes;NONCODE	0.00633338
932	TC11000504.hg.1	TC11000504.hg.1	chr11	+	59824060	59838601	116	14541	59824060	MS4A3	MS4A3;MS4A3;MS4A3;MS4A3;MS4A3;MS4A3;MS4A3;MS4A3;MS4A3;MS4A3;MS4A3	MS4A3	NM_001031666;NM_001031809;NM_006138;ENST00000278865;ENST00000358152;ENST00000395032;ENST00000526199;ENST00000534744;BC008487;uc001nom.3;uc001non.3;uc001noo.3	RefSeq;RefSeq;RefSeq;ENSEMBL;ENSEMBL;ENSEMBL;ENSEMBL;ENSEMBL;GenBank;UCSCGenes;UCSCGenes;UCSCGenes	0.00295233
9322	TC19000118.hg.1	TC19000118.hg.1	chr19	+	6739691	6751537	275	11846	6739691	TRIP10	TRIP10;TRIP10;TRIP10;TRIP10;TRIP10;TRIP10;TRIP10;TRIP10;TRIP10;TRIP10;TRIP10;TRIP10;TRIP10;TRIP10;TRIP10	TRIP10	NM_004240;ENST00000313244;ENST00000313285;AB072596;AF380114;AF502289;BC013002;OTTHUMT00000317127;OTTHUMT00000317129;OTTHUMT00000317130;OTTHUMT00000317131;OTTHUMT00000317133;OTTHUMT00000317134;OTTHUMT00000317135;OTTHUMT00000317136;uc002mfr.3;uc002mfs.3;uc010dux.2;uc010duy.3;ENST00000420690;ENST00000481339;OTTHUMT00000317128	RefSeq;ENSEMBL;ENSEMBL;GenBank;GenBank;GenBank;GenBank;Havanatranscript;Havanatranscript;Havanatranscript;Havanatranscript;Havanatranscript;Havanatranscript;Havanatranscript;Havanatranscript;UCSCGenes;UCSCGenes;UCSCGenes;UCSCGenes;ENSEMBL;ENSEMBL;Havanatranscript	0.00394921
9330	TC02001142.hg.1	TC02001142.hg.1	chr2	+	197657675	197664352	30	6677	197657675	GTF3C3	NA	NA	OTTHUMT00000336367	Havanatranscript	0.0139041
93474	TC01006393.hg.1	TC01006393.hg.1	chr1	-	247197940	247242115	70	44175	247242115	ZNF670	ZNF670;ZNF670;ZNF670;ZNF670;ZNF670	ZNF670	NM_001204220;NM_033213;ENST00000366503;BC005360;OTTHUMT00000098183;uc001icd.2;uc021plz.1	RefSeq;RefSeq;ENSEMBL;GenBank;Havanatranscript;UCSCGenes;UCSCGenes	-0.00668754
9350	TC09000919.hg.1	TC09000919.hg.1	chr9	-	14719722	14722715	40	2993	14722715	CER1	CER1;CER1;CER1	CER1	NM_005454;ENST00000380911;BC069405;OTTHUMT00000055453;uc003zlj.3	RefSeq;ENSEMBL;GenBank;Havanatranscript;UCSCGenes	0.00302228
9352	TC18000532.hg.1	TC18000532.hg.1	chr18	-	54264439	54318505	160	54066	54318505	TXNL1	TXNL1;TXNL1;TXNL1;TXNL1;TXNL1;TXNL1;TXNL1;TXNL1;TXNL1	TXNL1	NM_004786;NR_024546;ENST00000217515;AB209263;AK094926;BC001156;NR_024546;OTTHUMT00000256064;uc002lgg.3;uc002lgh.3;uc002lgj.1;uc010xdz.2;ENST00000540155;BC025017;uc002lgi.3	RefSeq;RefSeq;ENSEMBL;GenBank;GenBank;GenBank;NONCODE;Havanatranscript;UCSCGenes;UCSCGenes;UCSCGenes;UCSCGenes;ENSEMBL;GenBankHTC;UCSCGenes	0.00128781
93622	TC04000071.hg.1	TC04000071.hg.1	chr4	+	6675178	6677774	60	2596	6675178	LOC93622	;;LOC93622;LOC93622;;;;LOC93622;LOC93622	LOC93622	NR_015433;BC021542;BC073972;uc003gji.2;uc003gji.2;uc003gjk.2;uc021xlb.1;ENST00000307533;ENST00000307533;OTTHUMT00000246832;OTTHUMT00000280445	RefSeq;GenBank;GenBank;UCSCGenes;NONCODE;UCSCGenes;UCSCGenes;ENSEMBL;NONCODE;Havanatranscript;Havanatranscript	-0.00788623
9372	TC01000639.hg.1	TC01000639.hg.1	chr1	+	52608046	52812358	226	204312	52608046	ZFYVE9	ZFYVE9;ZFYVE9;ZFYVE9;ZFYVE9;ZFYVE9;ZFYVE9;ZFYVE9;ZFYVE9;ZFYVE9;ZFYVE9;ZFYVE9	ZFYVE9	NM_004799;NM_007323;NM_007324;ENST00000287727;ENST00000357206;ENST00000361625;ENST00000371591;ENST00000469134;BC032680;OTTHUMT00000022083;OTTHUMT00000022084;OTTHUMT00000022085;OTTHUMT00000022086;uc001ctn.3;uc001cto.3;uc001ctp.3	RefSeq;RefSeq;RefSeq;ENSEMBL;ENSEMBL;ENSEMBL;ENSEMBL;ENSEMBL;GenBank;Havanatranscript;Havanatranscript;Havanatranscript;Havanatranscript;UCSCGenes;UCSCGenes;UCSCGenes	0.0030236
9398	TC01001025.hg.1	TC01001025.hg.1	chr1	+	117544372	117579173	182	34801	117544372	CD101	CD101;CD101;CD101;CD101;CD101;CD101;CD101;CD101;CD101;CD101	CD101	NM_001256106;NM_001256109;NM_001256111;NM_004258;ENST00000256652;ENST00000369470;ENST00000467588;AK298237;BC130327;BC136484;BC171768;OTTHUMT00000033274;OTTHUMT00000033275;OTTHUMT00000033276;Z33642;uc009whd.3;uc010oxb.1;uc010oxc.1;uc010oxd.1	RefSeq;RefSeq;RefSeq;RefSeq;ENSEMBL;ENSEMBL;ENSEMBL;GenBank;GenBank;GenBank;GenBank;Havanatranscript;Havanatranscript;Havanatranscript;GenBank;UCSCGenes;UCSCGenes;UCSCGenes;UCSCGenes	0.0247448
9435	TC03003405.hg.1	TC03003405.hg.1	chr3	+	142838173	142842856	80	4683	142838173	CHST2	CHST2;CHST2;CHST2;CHST2	CHST2	NM_004267;ENST00000309575;BC105010;OTTHUMT00000354850;uc003evm.3;uc021xex.1	RefSeq;ENSEMBL;GenBank;Havanatranscript;UCSCGenes;UCSCGenes	-0.00130359
944	TC09001516.hg.1	TC09001516.hg.1	chr9	-	117655623	117692875	110	37252	117692875	TNFSF8	TNFSF8;TNFSF8;TNFSF8;TNFSF8;TNFSF8;TNFSF8	TNFSF8	NM_001244;NM_001252290;ENST00000223795;ENST00000474301;BC093630;BC111939;OTTHUMT00000055464;OTTHUMT00000055465;uc004bji.2;uc022bmi.1	RefSeq;RefSeq;ENSEMBL;ENSEMBL;GenBank;GenBank;Havanatranscript;Havanatranscript;UCSCGenes;UCSCGenes	0.00330014
946	TC19001782.hg.1	TC19001782.hg.1	chr19	-	52021073	52035110	217	14037	52035110	SIGLEC6	SIGLEC6;SIGLEC6;SIGLEC6;SIGLEC6;SIGLEC6;SIGLEC6;SIGLEC6;SIGLEC6;SIGLEC6;SIGLEC6;SIGLEC6;SIGLEC6;SIGLEC6;SIGLEC6;SIGLEC6;SIGLEC6;SIGLEC6;SIGLEC6;SIGLEC6;SIGLEC6;SIGLEC6;SIGLEC6;SIGLEC6;SIGLEC6;SIGLEC6;SIGLEC6;SIGLEC6;SIGLEC6;SIGLEC6;SIGLEC6	SIGLEC6	NM_001177547;NM_001177548;NM_001177549;NM_001245;NM_198845;NM_198846;ENST00000343300;ENST00000346477;ENST00000359982;ENST00000391797;ENST00000425629;ENST00000436458;ENST00000474054;AK308174;AK309903;BC035359;BC140798;OTTHUMT00000257670;OTTHUMT00000257671;OTTHUMT00000257672;OTTHUMT00000338065;OTTHUMT00000338066;OTTHUMT00000338067;OTTHUMT00000338068;OTTHUMT00000338069;OTTHUMT00000338070;uc002pwy.3;…	RefSeq;RefSeq;RefSeq;RefSeq;RefSeq;RefSeq;ENSEMBL;ENSEMBL;ENSEMBL;ENSEMBL;ENSEMBL;ENSEMBL;ENSEMBL;GenBankHTC;GenBankHTC;GenBank;GenBank;Havanatranscript;Havanatranscript;Havanatranscript;Havanatranscript;Havanatranscript;Havanatranscript;Havanatranscript;Havanatranscript;Havanatranscript;UCSCGenes;UCSCGenes;UCSCGenes;UCSCGenes;UCSCGenes;UCSCGenes;UCSCGenes;UCSCGenes	-0.00497077
946	TC19002560.hg.1	TC19002560.hg.1	chr19	-	52020951	52035110	140	14159	52035110	SIGLEC6	NA	NA	D86358	NONCODE	-0.00221864
9463	TC22000296.hg.1	TC22000296.hg.1	chr22	+	38452318	38471708	294	19390	38452318	PICK1	PICK1;PICK1;PICK1;PICK1;PICK1;PICK1;PICK1;PICK1;PICK1;PICK1;PICK1;PICK1;PICK1;PICK1;PICK1;PICK1;PICK1;PICK1;PICK1;PICK1;PICK1;PICK1;PICK1;PICK1	PICK1	NM_001039583;NM_001039584;NM_012407;ENST00000356976;ENST00000404072;ENST00000468288;BC017561;CR456550;OTTHUMT00000321569;OTTHUMT00000321608;OTTHUMT00000321609;OTTHUMT00000321610;OTTHUMT00000321611;OTTHUMT00000321612;OTTHUMT00000321613;OTTHUMT00000321615;OTTHUMT00000321616;OTTHUMT00000321617;OTTHUMT00000321618;OTTHUMT00000321619;OTTHUMT00000321620;OTTHUMT00000321621;OTTHUMT00000321622;uc003auq.3;u…	RefSeq;RefSeq;RefSeq;ENSEMBL;ENSEMBL;ENSEMBL;GenBank;GenBank;Havanatranscript;Havanatranscript;Havanatranscript;Havanatranscript;Havanatranscript;Havanatranscript;Havanatranscript;Havanatranscript;Havanatranscript;Havanatranscript;Havanatranscript;Havanatranscript;Havanatranscript;Havanatranscript;Havanatranscript;UCSCGenes;UCSCGenes;UCSCGenes;UCSCGenes;Havanatranscript	0.00847789
947	TC01006074.hg.1	TC01006074.hg.1	chr1	-	208061164	208070937	50	9773	208070937	CD34	NA	NA	AF202879	NONCODE	0.00576394
9472	TC14000208.hg.1	TC14000208.hg.1	chr14	+	32798479	33302268	220	503789	32798479	AKAP6	AKAP6;AKAP6;AKAP6;AKAP6;AKAP6;AKAP6;AKAP6	AKAP6	NM_004274;ENST00000280979;ENST00000554449;ENST00000557272;ENST00000557354;BC137232;BC137233;BC150288;BC154413;OTTHUMT00000276617;uc001wrq.3;uc010aml.3	RefSeq;ENSEMBL;ENSEMBL;ENSEMBL;ENSEMBL;GenBank;GenBank;GenBank;GenBank;Havanatranscript;UCSCGenes;UCSCGenes	0.00562453
949	TC12002097.hg.1	TC12002097.hg.1	chr12	-	125261606	125365007	260	103401	125365007	SCARB1	SCARB1;SCARB1;SCARB1;SCARB1;SCARB1;SCARB1;SCARB1;SCARB1;SCARB1;SCARB1;SCARB1;SCARB1;SCARB1;SCARB1;SCARB1;SCARB1	SCARB1	NM_001082959;NM_005505;ENST00000261693;ENST00000339570;ENST00000415380;ENST00000535005;ENST00000544327;ENST00000546215;AK304730;BC022087;BC080647;BC093732;BC143319;uc001ugm.4;uc001ugn.4;uc001ugo.4;uc001ugp.3;uc010tbd.2;ENST00000376788;ENST00000540495;ENST00000541205	RefSeq;RefSeq;ENSEMBL;ENSEMBL;ENSEMBL;ENSEMBL;ENSEMBL;ENSEMBL;GenBank;GenBankHTC;GenBank;GenBank;GenBank;UCSCGenes;UCSCGenes;UCSCGenes;UCSCGenes;UCSCGenes;ENSEMBL;ENSEMBL;ENSEMBL	-0.0167509
9495	TC14000389.hg.1	TC14000389.hg.1	chr14	+	64932217	64941221	70	9004	64932217	AKAP5	AKAP5;AKAP5;AKAP5;AKAP5;AKAP5;AKAP5	AKAP5	NM_004857;ENST00000320636;ENST00000394718;BC131516;OTTHUMT00000073901;OTTHUMT00000268070;uc001xhd.4;uc021ruk.1	RefSeq;ENSEMBL;ENSEMBL;GenBank;Havanatranscript;Havanatranscript;UCSCGenes;UCSCGenes	-0.00476763
9616	TC03000764.hg.1	TC03000764.hg.1	chr3	+	141457046	141466402	153	9356	141457046	RNF7	RNF7;RNF7;RNF7;RNF7;RNF7;RNF7;RNF7;RNF7;RNF7;RNF7;RNF7;RNF7;RNF7;RNF7;RNF7;RNF7;RNF7;RNF7;RNF7	RNF7	NM_001201370;NM_014245;NM_183237;NR_037702;NR_037703;ENST00000273480;ENST00000393000;ENST00000480908;ENST00000486377;BC005966;BC008627;NR_037702;OTTHUMT00000280602;OTTHUMT00000280603;OTTHUMT00000280604;OTTHUMT00000280605;OTTHUMT00000280607;OTTHUMT00000353057;OTTHUMT00000353100;uc003euc.3;uc003eud.3;uc003eue.3;uc021xet.1;uc021xeu.1	RefSeq;RefSeq;RefSeq;RefSeq;RefSeq;ENSEMBL;ENSEMBL;ENSEMBL;ENSEMBL;GenBank;GenBank;NONCODE;Havanatranscript;Havanatranscript;Havanatranscript;Havanatranscript;Havanatranscript;Havanatranscript;Havanatranscript;UCSCGenes;UCSCGenes;UCSCGenes;UCSCGenes;UCSCGenes	-0.00395399
966	TC11003113.hg.1	TC11003113.hg.1	chr11	-	33724567	33725791	30	1224	33725791	CD59	NA	NA	BC033226	NONCODE	0.0030219
977	TC11000034.hg.1	TC11000034.hg.1	chr11	+	832843	839831	140	6988	832843	CD151	CD151;CD151;CD151;CD151;CD151;CD151;CD151;CD151;CD151;CD151;CD151;CD151;CD151;CD151;CD151	CD151	NM_001039490;NM_004357;NM_139029;NM_139030;ENST00000322008;ENST00000397420;ENST00000397421;ENST00000525181;ENST00000528011;AK223186;BC001374;BC013302;OTTHUMT00000257108;uc001lrx.3;uc001lry.3;uc001lrz.3;uc001lsa.3;uc001lsb.3;ENST00000528143	RefSeq;RefSeq;RefSeq;RefSeq;ENSEMBL;ENSEMBL;ENSEMBL;ENSEMBL;ENSEMBL;GenBank;GenBank;GenBank;Havanatranscript;UCSCGenes;UCSCGenes;UCSCGenes;UCSCGenes;UCSCGenes;ENSEMBL	0.0112877
98	TC02004966.hg.1	TC02004966.hg.1	chr2	+	54342410	54532437	120	190027	54342410	ACYP2	ACYP2;ACYP2;ACYP2;ACYP2;ACYP2;ACYP2;ACYP2;ACYP2;ACYP2	ACYP2	NM_138448;ENST00000303536;ENST00000394666;ENST00000406041;ENST00000494922;BC012290;OTTHUMT00000251415;OTTHUMT00000324067;OTTHUMT00000324068;OTTHUMT00000326175;uc002rxq.4	RefSeq;ENSEMBL;ENSEMBL;ENSEMBL;ENSEMBL;GenBank;Havanatranscript;Havanatranscript;Havanatranscript;Havanatranscript;UCSCGenes	0.00704943
9866	TC11001387.hg.1	TC11001387.hg.1	chr11	-	8633584	8693413	270	59829	8693413	TRIM66	TRIM66;TRIM66;TRIM66;TRIM66;TRIM66;TRIM66;TRIM66;TRIM66	TRIM66	NM_014818;ENST00000299550;ENST00000402157;ENST00000531498;AK308310;OTTHUMT00000318299;OTTHUMT00000318300;uc009yfq.3;uc010rbo.2	RefSeq;ENSEMBL;ENSEMBL;ENSEMBL;GenBankHTC;Havanatranscript;Havanatranscript;UCSCGenes;UCSCGenes	0.00324475
9866	TC11003045.hg.1	TC11003045.hg.1	chr11	-	8633589	8635083	30	1494	8635083	TRIM66	NA	NA	AK000908	NONCODE	9.35e-05
9951	TC16000285.hg.1	TC16000285.hg.1	chr16	+	25703347	26149009	60	445662	25703347	HS3ST4	HS3ST4;HS3ST4;HS3ST4;HS3ST4;HS3ST4	HS3ST4	NM_006040;ENST00000331351;ENST00000475436;OTTHUMT00000133286;OTTHUMT00000276993;uc002dof.3	RefSeq;ENSEMBL;ENSEMBL;Havanatranscript;Havanatranscript;UCSCGenes	-0.0117826
9989	TC18000318.hg.1	TC18000318.hg.1	chr18	-	9546789	9614600	257	67811	9614600	PPP4R1	PPP4R1;PPP4R1;PPP4R1;PPP4R1;PPP4R1;PPP4R1;PPP4R1	PPP4R1	NM_001042388;NM_005134;ENST00000285124;ENST00000400555;ENST00000400556;AK293869;AK295533;BC060829;OTTHUMT00000268571;OTTHUMT00000268572;uc002kod.1;uc002koe.1;uc002kof.2;uc010wzo.1;uc010wzp.1	RefSeq;RefSeq;ENSEMBL;ENSEMBL;ENSEMBL;GenBank;GenBank;GenBank;Havanatranscript;Havanatranscript;UCSCGenes;UCSCGenes;UCSCGenes;UCSCGenes;UCSCGenes	-0.000237492
999	TC16000559.hg.1	TC16000559.hg.1	chr16	+	68771128	68869444	230	98316	68771128	CDH1	CDH1;CDH1;CDH1;CDH1;CDH1;CDH1;CDH1	CDH1	NM_004360;ENST00000261769;ENST00000422392;AB025105;BC141838;BC144283;OTTHUMT00000268897;uc002ewg.1;uc010cfg.1;uc010vlj.1;ENST00000268794;ENST00000379120	RefSeq;ENSEMBL;ENSEMBL;GenBank;GenBank;GenBankHTC;Havanatranscript;UCSCGenes;UCSCGenes;UCSCGenes;ENSEMBL;ENSEMBL	0.00624665
