# Supplementary material for: Associations of four biological age markers with child development: A multi-omic analysis in the European HELIX cohort
Source: eLife. 2023 Jun 6;12:e85104. doi: 10.7554/eLife.85104 (PMC10338035; doi:10.7554/eLife.85104)
Supplement: Supplementary file 5. [file elife-85104-supp5.xlsx]

## Sheet: Sheet1
Supplementary file 5 : Overrepresentation analysis in ConsesuspathDB against KEGG and REACTOME pathways, of all transcripts contributing to the transcriptome clock
p-value	q-value	pathway	source	external_id	members_input_overlap	members_input_overlap_geneids	size	effective_size
1.95769e-09	6.8519e-07	Ribosome biogenesis in eukaryotes - Homo sapiens (human)	KEGG	path:hsa03008	RNA5S12; RNA5S1; RNA5S7; RNA5S16; RNA5S17; RNA5S11; RNA5S8; RNA5S10; RNA5S5; RNA5S4; RNA5S13; RNA5S6; RNA5S15; RNA5S14; RNA5S3; RNA5S2	100169753; 100169754; 100169755; 100169756; 100169757; 100169759; 100169761; 100169762; 100169763; 100169764; 100169765; 100169766; 100169767; 100169768; 100169751; 100169758	110	108
1.39891e-08	2.4481e-06	Ribosome - Homo sapiens (human)	KEGG	path:hsa03010	RNA5S6; RPS14; RNA5S15; RPS21; RNA5S16; RNA5S14; RNA5S11; RNA5S3; RNA5S8; RNA5S4; RNA5S5; RNA5S10; RNA5S7; RNA5S12; RNA5S1; RNA5S13; RNA5S17; RNA5S2	100169756; 100169758; 100169761; 100169762; 100169763; 100169764; 100169768; 6208; 6227; 100169751; 100169753; 100169754; 100169755; 100169757; 100169759; 100169765; 100169766; 100169767	158	158
0.000778877	0.0757189	Axon guidance - Homo sapiens (human)	KEGG	path:hsa04360	NTNG1; ROBO1; EPHA6; NTN4; EPHA4; PIK3CD; EFNA1; PLXNA4; NEO1; PIK3R1; WNT5B; SEMA4B	5293; 285220; 81029; 5295; 10509; 22854; 4756; 59277; 1942; 91584; 6091; 2043	182	182
0.000865359	0.0757189	RHOU GTPase cycle	Reactome	R-HSA-9013420	TXNL1; SPTBN1; MYO6; PIK3R1; PEAK1	9352; 79834; 5295; 4646; 6711	34	34
0.00319236	0.146652	Immunoregulatory interactions between a Lymphoid and a non-Lymphoid cell	Reactome	R-HSA-198933	KLRC1; CXADR; IGHV3-7; CD34; IGHV3-53; IGLV3-27; B2M; LAIR1; CDH1; IGHV3-33; SIGLEC6; CD300A	946; 3821; 567; 1525; 3903; 28452; 28434; 28420; 28791; 999; 947; 11314	215	215
0.00319236	0.146652	Cell surface interactions at the vascular wall	Reactome	R-HSA-202733	CXADR; SLC7A8; IGHV3-7; MERTK; ATP1B2; PICK1; ATP1B1; IGHV3-53; IGHV3-33; PIK3R1; CEACAM8; IGLV3-27	28420; 9463; 1525; 23428; 482; 28452; 481; 5295; 28434; 28791; 1088; 10461	215	215
0.00331469	0.146652	cAMP signaling pathway - Homo sapiens (human)	KEGG	path:hsa04024	LIPE; ATP1B2; OXTR; PIK3CD; RAP1B; PTGER2; CHRM2; NPY; PIK3R1; PPARA; ATP1B1; SUCNR1	481; 5732; 1129; 5908; 5293; 5295; 482; 4852; 5465; 56670; 3991; 5021	216	216
0.00354646	0.146652	Complement cascade	Reactome	R-HSA-166658	CR2; IGHV3-7; CFH; C4BPA; CFD; CD59; IGLV3-27; IGHV3-53; IGHV3-33	722; 966; 28452; 28434; 28420; 3075; 28791; 1380; 1675	137	137
0.00377104	0.146652	Carbohydrate digestion and absorption - Homo sapiens (human)	KEGG	path:hsa04973	ATP1B2; PLCB1; PIK3CD; PIK3R1; ATP1B1	5293; 5295; 23236; 482; 481	47	47
0.00470324	0.164613	Signaling pathways regulating pluripotency of stem cells - Homo sapiens (human)	KEGG	path:hsa04550	IGF1R; ACVR1C; HESX1; WNT10A; PIK3CD; SKIL; PIK3R1; WNT5B; FGFR1	8820; 81029; 5293; 5295; 2260; 130399; 6498; 3480; 80326	143	143
0.00555918	0.176883	Signaling by TGFB family members	Reactome	R-HSA-9006936	GREM2; ACVR1C; ZFYVE9; BMP10; SKIL; CER1; CDK8	27302; 1024; 64388; 9350; 9372; 6498; 130399	96	96
0.00659209	0.187188	RHOV GTPase cycle	Reactome	R-HSA-9013424	TXNL1; SPTBN1; PIK3R1; PEAK1	9352; 79834; 5295; 6711	34	34
0.00744306	0.187188	Rap1 signaling pathway - Homo sapiens (human)	KEGG	path:hsa04015	RASGRP3; IGF1R; PLCB1; PIK3CD; RAP1B; EFNA1; PFN2; PIK3R1; CDH1; P2RY1; FGFR1	5217; 5293; 5295; 25780; 23236; 5908; 2260; 3480; 1942; 5028; 999	210	210
0.00748752	0.187188	Regulation of Complement cascade	Reactome	R-HSA-977606	CR2; IGHV3-7; CFH; C4BPA; CD59; IGLV3-27; IGHV3-53; IGHV3-33	722; 966; 28452; 28434; 28420; 3075; 28791; 1380	127	127
0.00891249	0.207958	Aldosterone-regulated sodium reabsorption - Homo sapiens (human)	KEGG	path:hsa04960	ATP1B2; PIK3CD; PIK3R1; ATP1B1	5293; 5295; 481; 482	37	37
0.0107869	0.224501	FLT3 signaling in disease	Reactome	R-HSA-9682385	SPTBN1; FLT3; PIK3R1	5295; 2322; 6711	21	21
0.0109043	0.224501	HIF-1 signaling pathway - Homo sapiens (human)	KEGG	path:hsa04066	NOS2; PIK3CD; IGF1R; ENO2; ENO4; PIK3R1; BCL2	596; 387712; 5293; 5295; 4843; 3480; 2026	109	109
0.0127536	0.233447	Gamma carboxylation, hypusine formation and arylsulfatase activation	Reactome	R-HSA-163841	PROZ; DPH3; ARSI; TPST1	340075; 8460; 8858; 285381	41	41
0.0139022	0.233447	RHOBTB1 GTPase cycle	Reactome	R-HSA-9013422	STK38; TXNL1; MYO6	9352; 11329; 4646	23	23
0.0154053	0.233447	Pathways in cancer - Homo sapiens (human)	KEGG	path:hsa05200	PLCB1; NOS2; STAT4; GSTT1; RASGRP3; MMP2; LRP5; PIK3CD; IGF1R; PTGER2; IFNA17; DLL1; PIK3R1; WNT10A; CDH1; WNT5B; BCL2; TXNRD2; FLT3; FGFR1	2260; 4313; 2322; 10587; 80326; 2952; 596; 23236; 4843; 999; 81029; 5293; 5295; 25780; 3451; 3480; 5732; 6775; 28514; 4041	531	531
0.0156314	0.233447	RHOBTB2 GTPase cycle	Reactome	R-HSA-9013418	STK38; TXNL1; MYO6	9352; 11329; 4646	24	24
0.0165671	0.233447	Hemostasis	Reactome	R-HSA-109582	SLC7A8; RAP1B; HABP4; IGHV3-53; MAFK; IGHV3-33; IGHV3-7; PIK3R1; CEACAM8; IFNA17; PCYOX1L; NOS2; ATP1B2; ATP1B1; PPP2R5A; MERTK; P2RY1; KIF3C; CXADR; KIF21A; CFD; PICK1; IGLV3-27; CD109	55605; 4843; 28420; 7975; 23428; 22927; 5525; 9463; 28434; 135228; 78991; 3451; 1675; 482; 28452; 5028; 28791; 1088; 10461; 1525; 481; 5295; 5908; 3797	677	677
0.0170729	0.233447	Breast cancer - Homo sapiens (human)	KEGG	path:hsa05224	IGF1R; LRP5; WNT10A; PIK3CD; DLL1; PIK3R1; WNT5B; FGFR1	81029; 5293; 5295; 2260; 28514; 3480; 80326; 4041	147	147
0.0183891	0.233447	Post-translational modification: synthesis of GPI-anchored proteins	Reactome	R-HSA-163125	PGAP1; ART4; PIGH; CD109; FCGR3B; NTNG1	420; 5283; 135228; 22854; 2215; 80055	94	94
0.0183891	0.233447	Antigen activates B Cell Receptor (BCR) leading to generation of second messengers	Reactome	R-HSA-983695	IGHV3-7; PIK3CD; IGLV3-27; IGHV3-53; IGHV3-33; PIK3R1	28452; 5295; 28434; 28420; 28791; 5293	94	94
0.0194371	0.233447	Basigin interactions	Reactome	R-HSA-210991	ATP1B2; SLC7A8; ATP1B1	23428; 482; 481	26	26
0.0194371	0.233447	Signaling by BMP	Reactome	R-HSA-201451	GREM2; BMP10; CER1	64388; 9350; 27302	26	26
0.0197157	0.233447	Central carbon metabolism in cancer - Homo sapiens (human)	KEGG	path:hsa05230	SLC1A5; PIK3CD; FLT3; PIK3R1; FGFR1	5295; 2322; 5293; 2260; 6510	70	70
0.0202597	0.233447	Assembly of collagen fibrils and other multimeric structures	Reactome	R-HSA-2022090	CD151; CTSB; BMP1; PXDN	7837; 977; 1508; 649	47	47
0.0215146	0.233447	Infection with Mycobacterium tuberculosis	Reactome	R-HSA-9635486	NOS2; B2M; LTF	4843; 4057; 567	27	27
0.021997	0.233447	Melanoma - Homo sapiens (human)	KEGG	path:hsa05218	CDH1; IGF1R; PIK3CD; PIK3R1; FGFR1	3480; 5293; 5295; 2260; 999	72	72
0.0221055	0.233447	Aldosterone synthesis and secretion - Homo sapiens (human)	KEGG	path:hsa04925	PLCB1; LIPE; CYP21A2; SCARB1; ATP1B2; ATP1B1	1589; 23236; 3991; 949; 481; 482	98	98
0.0225426	0.233447	Signaling by the B Cell Receptor (BCR)	Reactome	R-HSA-983705	RASGRP3; IGHV3-7; PIK3CD; IGLV3-27; IGHV3-53; IGHV3-33; PIK3R1	28452; 5295; 28434; 28420; 28791; 25780; 5293	126	126
0.0237087	0.233447	SUMOylation of intracellular receptors	Reactome	R-HSA-4090294	PIAS3; NR5A2; PPARA	10401; 2494; 5465	28	28
0.0237087	0.233447	Keratan sulfate biosynthesis	Reactome	R-HSA-2022854	CHST2; B3GNT2; OMD	10678; 4958; 9435	28	28
0.0242719	0.233447	Neutrophil degranulation	Reactome	R-HSA-6798695	YPEL5; CFD; CCT8; CD59; BPI; PLAC8; CTSB; TNFAIP6; RAP1B; FCGR3B; B2M; LAIR1; LTF; PNP; CEACAM8; CD300A; MS4A3; GUSB	51646; 966; 51316; 932; 4057; 7130; 1508; 1088; 567; 2990; 10694; 4860; 5908; 671; 3903; 11314; 1675; 2215	487	486
0.0262981	0.233447	Pancreatic secretion - Homo sapiens (human)	KEGG	path:hsa04972	PLCB1; PLA2G10; ATP1B2; RAP1B; ATP1B1; SLC4A2	5908; 23236; 8399; 6522; 481; 482	102	102
0.027058	0.233447	Gastric acid secretion - Homo sapiens (human)	KEGG	path:hsa04971	PLCB1; SLC4A2; ATP1B2; KCNJ15; ATP1B1	23236; 481; 3772; 482; 6522	76	76
0.0274232	0.233447	Protein digestion and absorption - Homo sapiens (human)	KEGG	path:hsa04974	SLC7A8; KCNK5; ATP1B2; ATP1B1; SLC1A5; DPP4	1803; 6510; 23428; 8645; 481; 482	103	103
0.0282274	0.233447	IRS-related events triggered by IGF1R	Reactome	R-HSA-2428928	IGF1R; FLT3; PIK3R1; FGFR1	2260; 3480; 5295; 2322	52	52
0.0284464	0.233447	Trafficking of AMPA receptors	Reactome	R-HSA-399719	AKAP5; PICK1; MYO6	9495; 9463; 4646	30	30
0.0284464	0.233447	Glutamate binding, activation of AMPA receptors and synaptic plasticity	Reactome	R-HSA-399721	AKAP5; PICK1; MYO6	9495; 9463; 4646	30	30
0.0300147	0.233447	IGF1R signaling cascade	Reactome	R-HSA-2428924	IGF1R; FLT3; PIK3R1; FGFR1	2260; 3480; 5295; 2322	53	53
0.0300147	0.233447	Signaling by Type 1 Insulin-like Growth Factor 1 Receptor (IGF1R)	Reactome	R-HSA-2404192	IGF1R; FLT3; PIK3R1; FGFR1	2260; 3480; 5295; 2322	53	53
0.0300147	0.233447	Synthesis of PIPs at the plasma membrane	Reactome	R-HSA-1660499	PTPN13; PIK3CD; INPP4B; PIK3R1	5293; 8821; 5783; 5295	53	53
0.032404	0.24514	Apoptosis - Homo sapiens (human)	KEGG	path:hsa04210	PTPN13; CTSB; PIK3CD; TRADD; PARP3; PIK3R1; BCL2	8717; 596; 5783; 5293; 5295; 10039; 1508	136	136
0.0337859	0.24514	Regulation of lipolysis in adipocytes - Homo sapiens (human)	KEGG	path:hsa04923	PIK3CD; NPY; LIPE; PIK3R1	3991; 5293; 5295; 4852	57	55
0.0343786	0.24514	Hepatocellular carcinoma - Homo sapiens (human)	KEGG	path:hsa05225	IGF1R; GSTT1; LRP5; WNT10A; PIK3CD; PIK3R1; WNT5B; TXNRD2	2952; 81029; 5293; 5295; 10587; 3480; 80326; 4041	168	168
0.0364207	0.24514	Formation of the Early Elongation Complex	Reactome	R-HSA-113418	POLR2E; GTF2H2; CTDP1	5434; 9150; 2966	33	33
0.0364207	0.24514	Formation of the HIV-1 Early Elongation Complex	Reactome	R-HSA-167158	POLR2E; GTF2H2; CTDP1	5434; 9150; 2966	33	33
0.0364207	0.24514	Keratan sulfate/keratin metabolism	Reactome	R-HSA-1638074	CHST2; B3GNT2; OMD	10678; 4958; 9435	33	33
0.0364207	0.24514	Base excision repair - Homo sapiens (human)	KEGG	path:hsa03410	NTHL1; POLL; PARP3	27343; 4913; 10039	33	33
0.0409874	0.270672	Complement and coagulation cascades - Homo sapiens (human)	KEGG	path:hsa04610	CR2; C4BPA; CFD; CD59; CFH	1675; 3075; 966; 722; 1380	85	85
0.0454175	0.294373	RHOBTB GTPase Cycle	Reactome	R-HSA-9706574	STK38; TXNL1; MYO6	9352; 11329; 4646	36	36
0.0490439	0.2984	Gastric cancer - Homo sapiens (human)	KEGG	path:hsa05226	LRP5; WNT10A; PIK3CD; PIK3R1; CDH1; WNT5B; BCL2	999; 5295; 596; 81029; 5293; 80326; 4041	149	149
0.0497308	0.2984	Innate Immune System	Reactome	R-HSA-168249	BPI; CD59; RAP1B; FCGR3B; IGHV3-53; LAIR1; MS4A3; YPEL5; CCT8; IGHV3-7; PLAC8; PIK3R1; NOD2; CEACAM8; IFNA17; GUSB; NOS2; CTSB; LTF; CR2; CFH; PNP; CFD; TNFAIP6; B2M; TKFC; IGLV3-27; DEFB129; C4BPA; IGHV3-33; CD300A; BCL2	4843; 51316; 1380; 140881; 28420; 722; 3075; 5295; 3903; 932; 4057; 51646; 28434; 966; 26007; 3451; 7130; 28452; 28791; 1088; 1508; 64127; 1675; 567; 2990; 10694; 596; 4860; 5908; 671; 11314; 2215	1065	1064
0.049867	0.2984	Sphingolipid signaling pathway - Homo sapiens (human)	KEGG	path:hsa04071	PLCB1; PIK3CD; TRADD; PIK3R1; PPP2R5A; BCL2	8717; 5293; 596; 5295; 23236; 5525	119	119
0.049867	0.2984	Glycosaminoglycan metabolism	Reactome	R-HSA-1630316	HS3ST4; B3GNT2; CSPG5; OMD; CHST2; GUSB	9951; 4958; 2990; 10675; 9435; 10678	119	119
