# Supplementary material for: Associations of four biological age markers with child development: A multi-omic analysis in the European HELIX cohort
Source: eLife. 2023 Jun 6;12:e85104. doi: 10.7554/eLife.85104 (PMC10338035; doi:10.7554/eLife.85104)
Supplement: Supplementary file 6. [file elife-85104-supp6.xlsx]

## Sheet: Sheet1
Supplementary file 6: Overrepresentation analysis in ConsesuspathDB against Gene Ontology (GO) biological process terms, of all transcripts contributing to the transcriptome clock
p-value	q-value	term_goid	term_category	term_level	term_name	members_input_overlap	members_input_overlap_geneids	size	effective_size
0.000343906	0.0247319	GO:0045321	b	2	leukocyte activation	567; 596; 671; 944; 966; 977; 1088; 1380; 1493; 1525; 1675; 1803; 2215; 2322; 2990; 3140; 3451; 3821; 3903; 4057; 51316; 4860; 5293; 5295; 5908; 6504; 7130; 8399; 932; 10039; 10461; 10694; 11314; 56670; 1508; 390530; 51646; 55795; 159296; 28420; 28434; 28448; 28452; 28514; 81609; 64127	PCID2; IGHV1OR21-1; BPI; CD59; RAP1B; FCGR3B; CD151; B2M; LAIR1; NKX2-3; FLT3; YPEL5; CCT8; IGHV3-7; PLAC8; PIK3CD; MR1; MS4A3; IGHV3-15; TNFSF8; PIK3R1; NOD2; CEACAM8; IFNA17; SUCNR1; GUSB; KLRC1; CTLA4; CTSB; PARP3; DLL1; LTF; MERTK; CR2; CXADR; CD300A; PLA2G10; PNP; CFD; TNFAIP6; IGHV3-53; IGHV3-33; DPP4; SNX27; SLAMF1; BCL2	1321	1319
0.000449197	0.0247319	GO:0006928	b	2	movement of cell or subcellular component	481; 482; 596; 947; 949; 977; 999; 1088; 1525; 1601; 1803; 1824; 1942; 2043; 2260; 2622; 2650; 2838; 3480; 3797; 3800; 3801; 4041; 4703; 4756; 4825; 5028; 5217; 5293; 5295; 6356; 6367; 6711; 7130; 8399; 8717; 9350; 10239; 10461; 10509; 10678; 10769; 4646; 11117; 11314; 23236; 285220; 79834; 81029; 84062; 55686; 23286; 23428; 91584; 59277; 57643; 27302; 159296; 28420; 28434; 28452; 130399; 28791; …	GPR15; TNFAIP6; SLC7A8; PIK3CD; EPHA4; CD34; AP3S2; CD151; IGHV3-53; BMP10; IGHV3-33; CER1; DAB2; SEMA4B; IGLV3-27; SPTBN1; GCNT1; ACVR1C; B3GNT2; WWC1; PEAK1; DSC2; TRADD; KIFC3; ZSWIM5; NEO1; PIK3R1; EPHA6; CDH1; CEACAM8; NKX6-1; DPP4; PLCB1; IGF1R; PLK2; NTNG1; CCL11; NEB; NOD2; ATP1B2; MREG; EFNA1; ATP1B1; MERTK; DTNBP1; NKX2-3; P2RY1; KIF3C; FGFR1; CXADR; CCL22; PLA2G10; IGHV3-7; EMILIN1; LR…	2164	2162
0.000503118	0.0247319	GO:0050900	b	2	leukocyte migration	481; 482; 947; 1088; 1525; 1803; 2650; 2838; 5293; 5295; 6356; 6367; 10461; 11117; 11314; 23236; 23428; 159296; 28420; 28434; 28452; 28791; 64127	GPR15; SLC7A8; CD34; IGHV3-53; IGHV3-33; NKX2-3; GCNT1; IGHV3-7; PIK3CD; PIK3R1; NOD2; CEACAM8; CCL22; DPP4; PLCB1; CCL11; ATP1B2; ATP1B1; MERTK; CXADR; EMILIN1; IGLV3-27; CD300A	517	517
0.000655149	0.0247319	GO:0001775	b	2	cell activation	567; 596; 671; 944; 966; 977; 1088; 1380; 1493; 1525; 1675; 1803; 2215; 2322; 2990; 3140; 3451; 3821; 3903; 4057; 51316; 4860; 5028; 5293; 5295; 5908; 6504; 7130; 8399; 932; 10039; 10461; 10694; 11117; 11314; 56670; 1508; 23236; 390530; 51646; 55795; 159296; 28420; 28434; 28448; 28452; 28514; 81609; 64127	PCID2; IGHV1OR21-1; PLCB1; BPI; CD59; RAP1B; FCGR3B; CD151; B2M; LAIR1; NKX2-3; FLT3; YPEL5; CCT8; IGHV3-7; PLAC8; PIK3CD; MR1; MS4A3; IGHV3-15; TNFSF8; PIK3R1; NOD2; CEACAM8; IFNA17; SUCNR1; GUSB; KLRC1; CTLA4; CTSB; PARP3; DLL1; LTF; MERTK; P2RY1; CR2; CXADR; CD300A; PLA2G10; EMILIN1; PNP; CFD; TNFAIP6; IGHV3-53; IGHV3-33; DPP4; SNX27; SLAMF1; BCL2	1477	1475
0.00137119	0.0414099	GO:0032940	b	2	secretion by cell	291; 567; 671; 947; 966; 1088; 1675; 1803; 2029; 2215; 2990; 3903; 4041; 4057; 135228; 51316; 4825; 4843; 4860; 5021; 5028; 5293; 5908; 6510; 7130; 932; 9463; 10461; 10675; 10694; 11314; 56670; 1508; 78991; 57553; 285381; 84062; 51646; 55450; 22927; 23086; 23178; 341359; 130399	ACVR1C; BPI; CD59; CD34; RAP1B; FCGR3B; HABP4; B2M; LAIR1; MS4A3; YPEL5; CCT8; PLAC8; PASK; PIK3CD; SYT10; MICAL3; ENSA; CEACAM8; DPP4; CSPG5; SUCNR1; GUSB; PCYOX1L; NOS2; CTSB; SLC25A4; LTF; MERTK; DTNBP1; P2RY1; NKX6-1; DPH3; LRP5; PNP; CFD; TNFAIP6; PICK1; OXTR; SLC1A5; CAMK2N1; CD300A; CD109; EXPH5	1334	1331
0.00268476	0.0533656	GO:0051775	b	2	response to redox state	114990; 51022; 9616	RNF7; VASN; GLRX2	14	14
0.00333302	0.0533656	GO:0007631	b	2	feeding behavior	2019; 4160; 4852; 5021; 5028; 5367; 8484	GALR3; PMCH; EN1; NPY; OXTR; P2RY1; MC4R	94	94
0.00362067	0.0533656	GO:0002252	b	2	immune effector process	567; 596; 671; 722; 966; 1088; 1380; 1675; 2215; 2990; 3075; 3140; 3451; 3821; 3903; 4057; 51316; 4860; 5293; 5295; 5908; 6035; 6504; 7130; 8399; 932; 10039; 10694; 11314; 56670; 1508; 390530; 51646; 26007; 159296; 28420; 28434; 28448; 28452; 28514; 28791; 64127	RNASE1; IGHV1OR21-1; BPI; CD59; RAP1B; FCGR3B; B2M; LAIR1; NKX2-3; MS4A3; YPEL5; CCT8; IGHV3-7; C4BPA; PIK3CD; MR1; IGHV3-15; PIK3R1; NOD2; CEACAM8; IFNA17; SUCNR1; GUSB; KLRC1; CTSB; PARP3; DLL1; LTF; CR2; PLA2G10; CFH; PNP; CFD; TNFAIP6; IGHV3-53; TKFC; IGLV3-27; PLAC8; IGHV3-33; CD300A; SLAMF1; BCL2	1324	1322
0.00408078	0.0533656	GO:0097360	b	2	chorionic trophoblast cell proliferation	3641; 130399	INSL4; ACVR1C	5	5
0.00408078	0.0533656	GO:0035426	b	2	extracellular matrix-cell signaling	4041; 59277	NTN4; LRP5	5	5
0.00429758	0.0533656	GO:0048870	b	2	cell motility	481; 482; 596; 947; 949; 977; 999; 1088; 1525; 1601; 1803; 1942; 2043; 2260; 2622; 2650; 2838; 3480; 4041; 4825; 5028; 5217; 5293; 5295; 6356; 6367; 7130; 8717; 9350; 10461; 10509; 10769; 11117; 11314; 23236; 79834; 81029; 23286; 23428; 91584; 59277; 27302; 159296; 28420; 28434; 28452; 130399; 28791; 6091; 22854; 64127	GPR15; SLC7A8; EPHA4; CD34; CD151; IGHV3-53; BMP10; IGHV3-33; CER1; DAB2; SEMA4B; IGLV3-27; GCNT1; ACVR1C; IGHV3-7; WWC1; PEAK1; PIK3CD; TRADD; PIK3R1; NOD2; CDH1; CEACAM8; FGFR1; DPP4; PLCB1; IGF1R; PLK2; CCL11; ATP1B2; EFNA1; ATP1B1; MERTK; NKX2-3; P2RY1; NTNG1; NKX6-1; CXADR; CCL22; EMILIN1; LRP5; ROBO1; SCARB1; TNFAIP6; NTN4; PLXNA4; GAS8; PFN2; WNT5B; CD300A; BCL2	1700	1698
0.00429758	0.0533656	GO:0051674	b	2	localization of cell	481; 482; 596; 947; 949; 977; 999; 1088; 1525; 1601; 1803; 1942; 2043; 2260; 2622; 2650; 2838; 3480; 4041; 4825; 5028; 5217; 5293; 5295; 6356; 6367; 7130; 8717; 9350; 10461; 10509; 10769; 11117; 11314; 23236; 79834; 81029; 23286; 23428; 91584; 59277; 27302; 159296; 28420; 28434; 28452; 130399; 28791; 6091; 22854; 64127	GPR15; SLC7A8; EPHA4; CD34; CD151; IGHV3-53; BMP10; IGHV3-33; CER1; DAB2; SEMA4B; IGLV3-27; GCNT1; ACVR1C; IGHV3-7; WWC1; PEAK1; PIK3CD; TRADD; PIK3R1; NOD2; CDH1; CEACAM8; FGFR1; DPP4; PLCB1; IGF1R; PLK2; CCL11; ATP1B2; EFNA1; ATP1B1; MERTK; NKX2-3; P2RY1; NTNG1; NKX6-1; CXADR; CCL22; EMILIN1; LRP5; ROBO1; SCARB1; TNFAIP6; NTN4; PLXNA4; GAS8; PFN2; WNT5B; CD300A; BCL2	1700	1698
0.00459439	0.0533656	GO:0050789	b	2	regulation of biological process	131118; 55655; 291; 481; 482; 567; 596; 649; 671; 722; 944; 947; 949; 966; 977; 999; 1024; 1129; 1376; 1380; 1491; 1493; 1525; 1601; 1611; 1675; 1803; 1824; 1942; 1990; 2019; 2026; 2029; 2037; 2043; 2215; 2260; 2322; 2494; 2622; 2838; 2842; 2907; 2966; 3075; 3140; 3203; 3248; 3299; 3451; 3480; 3641; 3706; 3772; 3821; 3903; 4041; 4057; 135228; 4160; 197320; 4313; 135458; 51316; 6227; 168448; 4703;…	PGAP1; OR6C74; HSF5; HSF4; IGHV1OR21-1; IGHV3-15; OR3A4P; PLK2; CD34; PPP4R1; GLRX2; ZFYVE9; B2M; MAFK; ZNF600; ANKIB1; DAB2; SEMA4B; BICC1; MS4A3; NTNG1; EXPH5; ZBTB38; BOD1; PRL; WWC1; CPT2; PIK3CD; MR1; PTGER2; ZSWIM5; FGFBP3; ENSA; EPHA6; CDH1; OR7D2; FGFR1; IFNA17; HMG20A; CLN8; NPR2; STAMBP; ZNF542P; CCL11; GRINA; NOD2; ATP1B2; ATP1B1; FXR1; CTDP1; CENPQ; NKX6-1; AKAP5; AKAP6; BMP1; CSPG5; …	11854	11839
0.00549401	0.0592569	GO:0001776	b	2	leukocyte homeostasis	596; 2322; 5293; 6498; 10461; 159296	PIK3CD; SKIL; MERTK; NKX2-3; FLT3; BCL2	78	78
0.00599912	0.0603912	GO:0072376	b	2	protein activation cascade	722; 966; 1380; 1675; 3075; 390530; 28420; 28434; 28448; 28452; 28791	CR2; CFH; IGHV1OR21-1; IGHV3-15; C4BPA; CFD; CD59; IGLV3-27; IGHV3-53; IGHV3-33; IGHV3-7	219	219
0.00686501	0.0647885	GO:0048871	b	2	multicellular organismal homeostasis	482; 567; 596; 947; 1376; 1525; 3480; 4057; 4160; 51316; 5021; 2055; 51599; 23178; 124220; 28514; 64116; 64127; 169200	CXADR; IGF1R; OXTR; ATP1B2; CPT2; CD34; NOD2; PASK; SLC39A8; DLL1; B2M; TMEM64; LSR; LTF; PLAC8; ZG16B; CLN8; MC4R; BCL2	491	491
0.00798179	0.0705782	GO:0007154	b	2	cell communication	291; 481; 482; 567; 596; 649; 671; 944; 946; 947; 949; 966; 999; 1129; 1380; 1491; 1493; 1525; 1601; 1611; 1675; 1803; 1824; 1942; 1990; 2029; 2043; 2215; 2260; 2322; 2494; 2622; 2838; 2842; 2907; 3248; 3451; 3480; 3641; 3706; 3821; 4041; 4057; 135228; 4160; 4313; 4756; 4825; 4843; 4852; 4882; 4992; 5021; 5028; 5293; 5295; 5367; 5434; 5465; 5525; 5617; 5732; 5783; 5908; 6356; 6367; 55679; 6461; 6…	OR6C74; IGHV1OR21-1; IGHV3-15; OR3A4P; PLK2; CD34; PPP4R1; GLRX2; ZFYVE9; B2M; DAB2; SEMA4B; BICC1; NTNG1; IGHV3-7; PRL; WWC1; ARHGEF5; PIK3CD; INPP4B; PTGER2; FGFBP3; ENSA; EPHA6; CDH1; OR7D2; FGFR1; IFNA17; NPR2; STAMBP; CXADR; GRINA; NOD2; ATP1B2; ATP1B1; NKX6-1; AKAP5; AKAP6; BMP1; CSPG5; PTPN13; SLC25A4; IGLV3-27; GALR3; ROBO1; NPY; CD300A; SCARB1; PXDN; RASGRP3; GPR15; ACVR1C; PLCB1; GLIS2;…	6715	6710
0.00872185	0.0705782	GO:0009719	b	2	response to endogenous stimulus	596; 999; 1129; 1601; 2043; 2260; 2322; 2494; 2650; 3248; 3480; 4041; 135228; 4313; 4756; 4825; 4843; 5021; 5028; 5069; 5295; 5434; 5465; 5617; 5732; 5908; 6498; 79041; 6660; 6775; 9350; 9372; 9472; 10401; 11117; 143282; 1508; 23236; 80326; 114990; 445329; 138307; 27302; 130399; 64127; 64388; 27244	SESN1; ACVR1C; EPHA4; NOS2; ZFYVE9; BMP10; CER1; DAB2; HPGD; SOX5; TMEM38A; STAT4; GCNT1; PRL; PTGER2; FLT3; NEO1; FGFBP3; NR5A2; PIK3R1; NOD2; CDH1; FGFR1; GREM2; PLCB1; IGF1R; VASN; SULT1A4; CTSB; CHRM2; PAPPA; POLR2E; RAP1B; SKIL; PPARA; P2RY1; NKX6-1; AKAP6; WNT10A; EMILIN1; LRP5; LCN8; CD109; PIAS3; OXTR; MMP2; BCL2	1597	1597
0.00888071	0.0705782	GO:0009605	b	2	response to external stimulus	567; 596; 671; 722; 944; 947; 949; 966; 1129; 1380; 1525; 1571; 1611; 1803; 1824; 1942; 2029; 2043; 2260; 2289; 3075; 3140; 3248; 3451; 3800; 4057; 135228; 4160; 51316; 4756; 4843; 4852; 5028; 5293; 5295; 5465; 5617; 6035; 6356; 6367; 6711; 7130; 8399; 8717; 9463; 140881; 10509; 338322; 10678; 56670; 285220; 390530; 51022; 22927; 91584; 59277; 59335; 57643; 26007; 28420; 28434; 28448; 28452; 1303…	TNFAIP6; SESN1; IGHV1OR21-1; TMEM135; BPI; PIK3CD; EPHA4; CD34; GLRX2; HABP4; FKBP5; B2M; IGHV3-33; NLRP10; SEMA4B; IGLV3-27; HPGD; MC4R; TKFC; ACVR1C; B3GNT2; C4BPA; DSC2; MR1; TRADD; ZSWIM5; TNFSF8; DAP; ENSA; PIK3R1; EPHA6; CCL22; DPP4; SUCNR1; RNASE1; IGHV3-7; NOS2; CD59; DEFB129; CCL11; NUPR2; NOD2; CHRM2; EFNA1; IGHV3-15; LTF; PPARA; PLA2G10; IGHV3-53; P2RY1; FGFR1; CR2; CXADR; NEO1; PRL; C…	2572	2570
0.00947602	0.0715439	GO:0007267	b	2	cell-cell signaling	291; 944; 946; 947; 999; 1129; 1525; 1601; 1803; 1942; 1990; 2029; 2043; 3641; 3706; 4041; 4825; 4843; 4852; 5021; 5028; 5367; 5908; 6367; 7130; 8484; 9350; 9463; 9495; 10461; 10675; 10769; 143282; 23236; 80114; 80326; 81029; 84062; 8820; 55450; 23178; 27303; 341359; 28514; 130399; 22854; 5204; 169200	ACVR1C; HESX1; EPHA4; CD34; RAP1B; RBMS3; CER1; DAB2; NTNG1; INSL4; PASK; BICC1; ITPKA; SYT10; TNFSF8; FGFBP3; ENSA; CDH1; CELA1; DPP4; CSPG5; PLCB1; NOS2; PLK2; PFDN5; AKAP5; CHRM2; EFNA1; SLC25A4; PMCH; DLL1; TMEM64; MERTK; DTNBP1; P2RY1; CAMK2N1; NKX6-1; CXADR; CCL22; WNT10A; LRP5; TNFAIP6; PICK1; GALR3; NPY; OXTR; WNT5B; SIGLEC6	1646	1646
0.0107983	0.0718009	GO:0048589	b	2	developmental growth	596; 1990; 2019; 51316; 4825; 5465; 5617; 6356; 9150; 9350; 9472; 10509; 116519; 23236; 114804; 8820; 23286; 91584; 27302; 28514; 130399	CCL11; AKAP6; PRL; ACVR1C; PLCB1; HESX1; PLAC8; WWC1; CER1; CTDP1; EN1; PLXNA4; PPARA; APOA5; BCL2; SEMA4B; CELA1; BMP10; RNF157; DLL1; NKX6-1	587	587
0.0111024	0.0718009	GO:0007165	b	2	signal transduction	481; 567; 596; 649; 671; 944; 947; 949; 966; 1129; 1380; 1491; 1493; 1601; 1611; 1675; 1942; 1990; 2043; 2215; 2260; 2322; 2494; 2622; 2838; 2842; 2907; 3248; 3451; 3480; 3641; 3706; 3821; 4041; 4057; 135228; 4160; 4313; 4756; 4825; 4843; 4852; 4882; 4992; 5021; 5028; 5293; 5295; 5367; 5434; 5465; 5525; 5617; 5732; 5783; 5908; 6356; 6367; 55679; 6461; 6498; 6504; 79041; 6711; 6775; 7130; 7433; 78…	OR6C74; IGHV1OR21-1; IGHV3-15; OR3A4P; PLK2; CD34; PPP4R1; GLRX2; ZFYVE9; B2M; DAB2; SEMA4B; BICC1; IGHV3-7; PRL; WWC1; ARHGEF5; PIK3CD; INPP4B; PTGER2; FGFBP3; OR7D2; FGFR1; IFNA17; NPR2; STAMBP; GRINA; NOD2; ATP1B1; NKX6-1; AKAP5; AKAP6; BMP1; CSPG5; PTPN13; SCARB1; IGLV3-27; GALR3; ROBO1; NPY; CD300A; PXDN; RASGRP3; GPR15; ACVR1C; PLCB1; GLIS2; GPR19; DCLK2; MC4R; EGFL7; INSL4; PASK; HPGD; ITP…	6210	6205
0.0112115	0.0718009	GO:0042221	b	2	response to chemical	291; 567; 596; 671; 944; 947; 949; 999; 1129; 1491; 1525; 1571; 1601; 1803; 1942; 2019; 2029; 2043; 2052; 2260; 2322; 2494; 2650; 2952; 3248; 3451; 3480; 3800; 4041; 4057; 135228; 4313; 4756; 4825; 4843; 4852; 4860; 4882; 4992; 5021; 5028; 5069; 5198; 5293; 5295; 5434; 5465; 5617; 5732; 5783; 5908; 6356; 6367; 6498; 6510; 79041; 6660; 6711; 6775; 7837; 7844; 8399; 8717; 9350; 9372; 9463; 9472; 10…	OR6C74; OR3A4P; CD34; GLRX2; ZFYVE9; B2M; DAB2; SEMA4B; SLC39A13; B3GNT2; PRL; PIK3CD; SYT10; PTGER2; ZSWIM5; FGFBP3; ENSA; CDH1; OR7D2; FGFR1; IFNA17; PFAS; CLN8; NPR2; CXADR; CTSB; PAPPA; NKX6-1; AKAP6; PTPN13; ACY3; SCARB1; KIF5C; ROBO1; NPY; RNF103; PXDN; SLC7A8; OR7A5; SLC29A4; HPGD; EN1; DNAJB11; NR5A2; PIK3R1; CCL22; TXNRD2; OR2AG1; EDARADD; PLCB1; POLR2E; PPARA; PLA2G10; GSTT1; CYP2E1; WN…	4693	4688
0.0115953	0.0718009	GO:0065008	b	2	regulation of biological quality	291; 481; 482; 567; 596; 947; 949; 966; 1376; 1525; 1589; 1803; 1824; 1942; 2029; 2043; 2322; 2494; 2907; 3451; 3480; 3706; 3991; 4041; 4057; 4160; 135458; 51316; 4703; 4756; 4825; 4843; 4852; 4882; 5021; 5028; 5217; 5293; 5295; 5465; 5570; 5617; 5732; 5828; 5886; 5908; 6208; 6356; 6498; 6510; 6522; 79041; 6711; 7975; 8087; 8399; 8645; 8858; 9350; 9463; 9472; 9495; 10039; 10401; 10461; 10509; 105…	PLK2; CD34; GLRX2; B2M; MAFK; NKX2-3; SEMA4B; SLC39A13; PRL; CPT2; PIK3CD; PTGER2; FGFBP3; ENSA; IFNA17; CLN8; NPR2; LIPE; CXADR; GRINA; ATP1B2; ATP1B1; FXR1; NKX6-1; AKAP5; AKAP6; CSPG5; FKBPL; SLC25A4; PKIB; DND1; NPY; SCARB1; HUS1B; SLC7A8; GLIS2; SLC29A4; APOA5; MC4R; ZG16B; CCT8; PLAC8; PASK; ITPKA; SYT10; LSR; NR5A2; PIK3R1; ATP10A; TXNRD2; PARP3; SLC39A8; PPARA; PEX2; PLA2G10; PROZ; PCID2;…	4060	4060
0.0118876	0.0718009	GO:0035265	b	2	organ growth	596; 5465; 9150; 9350; 9472; 23286; 27302; 28514	AKAP6; WWC1; CER1; CTDP1; DLL1; BMP10; PPARA; BCL2	148	148
0.0152734	0.088703	GO:0042330	b	2	taxis	1525; 1803; 1942; 2043; 2260; 3800; 4756; 5293; 5295; 6356; 6367; 6711; 8399; 10509; 10678; 56670; 285220; 91584; 59277; 57643; 6091; 64127	EPHA6; EPHA4; SEMA4B; SPTBN1; B3GNT2; PIK3CD; ZSWIM5; NEO1; PIK3R1; NOD2; CCL22; DPP4; SUCNR1; CCL11; EFNA1; FGFR1; CXADR; PLA2G10; ROBO1; KIF5C; NTN4; PLXNA4	645	645
0.0172965	0.0927298	GO:0003008	b	2	system process	131118; 481; 482; 567; 596; 947; 949; 1129; 1525; 1824; 2019; 3299; 3801; 4041; 4703; 4843; 4852; 4882; 4992; 5021; 5028; 5465; 5732; 5875; 6356; 79041; 8484; 8645; 9150; 9472; 10678; 50939; 10769; 4646; 116519; 80055; 143282; 2055; 56670; 23236; 144125; 768206; 81341; 442184; 55450; 123016; 254783; 26496; 59335; 26659; 256148; 27302; 341359; 28514; 390113; 390433; 390756; 64127; 162998	PGAP1; OR6C74; OR10A3; HSF4; OR4S1; PLK2; NEB; NPR2; CTDP1; B2M; BMP10; NOD2; APOA5; MYO6; TMEM38A; B3GNT2; KCNK5; DSC2; PTGER2; EN1; SYT10; FGFBP3; OR10W1; OR3A4P; OR7D2; OR7A5; SUCNR1; DNAJC19; PLCB1; NOS2; CCL11; CD34; TTC8; ATP1B2; CHRM2; ATP1B1; DLL1; PPARA; PRDM12; P2RY1; KIFC3; CXADR; AKAP6; OR2B3; IMPG2; LRP5; SCARB1; OR1F1; PRCD; GALR3; RABGGTA; NPY; OR2AG1; OR4K13; OXTR; CAMK2N1; CLN8; …	2176	2174
0.0176588	0.0927298	GO:0009653	b	2	anatomical structure morphogenesis	596; 649; 947; 977; 1601; 1942; 1990; 2019; 2043; 2260; 2494; 2650; 3203; 3248; 3706; 3800; 4041; 4057; 135228; 4313; 4703; 4756; 4825; 5028; 5293; 5295; 5465; 5617; 6356; 55679; 6461; 6498; 6660; 6711; 8399; 9350; 10461; 10509; 10643; 10675; 10678; 10769; 4646; 11117; 285220; 79834; 80326; 29993; 114804; 112724; 81029; 84062; 8820; 57194; 123016; 90625; 91584; 59277; 57643; 27302; 60676; 159296;…	TMEM135; HESX1; EPHA6; EPHA4; NEB; LIMS2; CD151; SEMA4B; BMP10; CER1; DAB2; NKX6-1; PLXNA4; HPGD; SPTBN1; SOX5; GCNT1; NTNG1; B3GNT2; ZSWIM5; PRL; PIK3CD; ITPKA; EN1; NEO1; NR5A2; PIK3R1; ATP10A; CELA1; SKIL; CSPG5; GREM2; PLK2; PEAK1; CD34; RDH13; TTC8; EFNA1; ERVH48-1; SHB; LTF; MERTK; PPARA; IGF2BP3; P2RY1; FKBPL; NKX2-3; DTNBP1; FGFR1; CCL11; PLA2G10; EMILIN1; BMP1; LRP5; ROBO1; PACSIN1; CD10…	2614	2610
0.017809	0.0927298	GO:0051716	b	2	cellular response to stimulus	481; 567; 596; 649; 671; 944; 947; 949; 966; 999; 1129; 1380; 1491; 1493; 1525; 1571; 1601; 1611; 1675; 1803; 1824; 1942; 1990; 2043; 2052; 2215; 2260; 2322; 2494; 2622; 2838; 2842; 2907; 2952; 2966; 3248; 3451; 3480; 3508; 3641; 3706; 3821; 4041; 4057; 135228; 4160; 4313; 135458; 168448; 4756; 4825; 4843; 4852; 4882; 4913; 4992; 5021; 5028; 5293; 5295; 5367; 5434; 5465; 5525; 5617; 5732; 5783; 5…	OR6C74; IGHV1OR21-1; IGHV3-15; OR3A4P; PLK2; CD34; PPP4R1; GLRX2; ZFYVE9; B2M; DAB2; SEMA4B; BICC1; B3GNT2; PRL; WWC1; ARHGEF5; PIK3CD; INPP4B; PTGER2; FGFBP3; EPHA6; CDH1; OR7D2; FGFR1; IFNA17; NPR2; STAMBP; CCL11; GRINA; NOD2; ATP1B1; FXR1; IGHMBP2; NKX6-1; AKAP5; AKAP6; BMP1; CSPG5; PTPN13; ACY3; SCARB1; IGLV3-27; GALR3; ROBO1; NPY; RNF103; NTHL1; CD300A; PXDN; HUS1B; RASGRP3; GPR15; ACVR1C; P…	7661	7653
0.0194196	0.0977454	GO:0048869	b	2	cellular developmental process	482; 567; 596; 649; 944; 947; 999; 81871; 1380; 1491; 1493; 1525; 1601; 1824; 1942; 1990; 2019; 2043; 2260; 2322; 2494; 3140; 3299; 3451; 3706; 3800; 3821; 4041; 4057; 135228; 4313; 51316; 4703; 4756; 4825; 4852; 4860; 4882; 5028; 5293; 5295; 5367; 5465; 5908; 6208; 6356; 55679; 6461; 6498; 6660; 6711; 8087; 8399; 9150; 402381; 9398; 9463; 9472; 10363; 10401; 10461; 10509; 10675; 10678; 10769; 46…	HSF4; PLK2; CD34; GLRX2; SFMBT1; B2M; DAB2; SEMA4B; NTNG1; B3GNT2; WNT10A; PIK3CD; MR1; ZSWIM5; EPHA6; CDH1; FGFR1; IFNA17; HMG20A; CLN8; KRTAP1-1; NPR2; CXADR; CTSB; ATP1B2; FXR1; NKX6-1; AKAP6; BMP1; CSPG5; ROBO1; KIF5C; EGFL7; DND1; NPY; ACVR1C; CTLA4; GLIS2; DMRTB1; NKX2-3; PLAC8; SOHLH1; KRTAP4-6; ITPKA; EN1; LSR; NR5A2; PIK3R1; EDARADD; PLCB1; LSM1; PMCH; SHB; PPARA; CR2; TMEM64; PLA2G10; P…	4370	4365
0.0217336	0.105028	GO:0048856	b	2	anatomical structure development	131118; 482; 567; 596; 649; 944; 947; 977; 999; 81871; 1129; 1380; 1491; 1493; 1525; 1601; 1824; 1942; 1990; 2019; 2043; 2260; 2322; 2494; 2650; 3140; 3203; 3248; 3299; 3451; 3480; 3706; 3800; 3821; 4041; 4057; 135228; 4313; 4703; 4756; 4825; 4852; 4860; 4882; 4958; 5021; 5028; 5198; 5293; 5295; 5367; 5465; 5617; 5908; 6208; 6356; 55679; 6461; 6498; 6522; 6660; 6711; 7844; 7975; 8087; 8399; 8717;…	PGAP1; HSF4; PLK2; CD34; SFMBT1; B2M; MAFK; DAB2; SEMA4B; BICC1; SLC39A13; NTNG1; B3GNT2; PRL; PIK3CD; MR1; ZSWIM5; EPHA6; CDH1; FGFR1; IFNA17; HMG20A; PFAS; CLN8; KRTAP1-1; NPR2; CXADR; CTSB; ATP1B2; FXR1; NKX6-1; AKAP6; BMP1; CSPG5; ROBO1; KIF5C; EGFL7; FKBPL; DND1; NPY; RNF103; PAPPA2; GREM2; ACVR1C; PLCB1; GLIS2; CD151; DMRTB1; NKX2-3; APOA5; HPGD; HOXA6; SOHLH1; KRTAP4-6; ITPKA; EN1; LSR; NR…	5866	5857
0.0222575	0.105028	GO:0071827	b	2	plasma lipoprotein particle organization	649; 949; 8399; 116519	APOA5; SCARB1; PLA2G10; BMP1	52	52
0.0234832	0.107453	GO:0033687	b	2	osteoblast proliferation	596; 4041; 4057	LRP5; LTF; BCL2	30	30
0.0244788	0.108715	GO:0061744	b	2	motor behavior	482; 1803	DPP4; ATP1B2	12	12
0.0252653	0.109002	GO:0008037	b	2	cell recognition	949; 2043; 10694; 390530; 283471; 28420; 28434; 28448; 28452; 6091	CCT8; IGHV3-7; IGHV1OR21-1; IGHV3-15; SCARB1; EPHA4; TMPRSS12; ROBO1; IGHV3-53; IGHV3-33	236	236
0.0266207	0.111659	GO:0007155	b	2	cell adhesion	481; 482; 596; 946; 947; 977; 999; 1088; 1493; 1525; 1803; 1824; 1942; 2043; 2650; 3801; 4756; 4860; 4958; 5295; 5465; 6356; 55679; 6504; 7130; 10461; 10675; 11117; 11314; 56101; 79834; 56110; 91584; 59277; 27302; 28514; 51162; 6091; 22854; 64116; 64127	EPHA4; CD34; LIMS2; CD151; BMP10; PCDHGB5; GCNT1; NTNG1; PEAK1; DSC2; NEO1; PIK3R1; NOD2; CDH1; CEACAM8; PCDHGA5; DPP4; CTLA4; CCL11; ATP1B2; EFNA1; ATP1B1; SLC39A8; DLL1; MERTK; PPARA; KIFC3; CSPG5; CXADR; EMILIN1; OMD; ROBO1; PNP; TNFAIP6; NTN4; PLXNA4; EGFL7; SIGLEC6; CD300A; SLAMF1; BCL2	1457	1456
0.02854	0.116474	GO:0097278	b	2	complement-dependent cytotoxicity	966; 3075	CD59; CFH	13	13
0.029504	0.11724	GO:0007275	b	2	multicellular organism development	131118; 482; 567; 596; 649; 944; 947; 999; 81871; 1129; 1380; 1491; 1493; 1525; 1601; 1824; 1942; 1990; 2019; 2043; 2260; 2322; 2494; 2650; 3140; 3203; 3248; 3299; 3451; 3480; 3706; 3800; 3821; 4041; 4057; 135228; 4313; 4703; 4756; 4825; 4852; 4860; 4882; 4958; 5021; 5028; 5293; 5295; 5367; 5465; 5617; 6208; 6356; 55679; 6461; 6498; 6522; 6660; 6711; 7844; 7975; 8087; 8399; 8717; 9150; 402381; 93…	PGAP1; HSF4; PLK2; CD34; SFMBT1; B2M; MAFK; DAB2; SEMA4B; BICC1; NTNG1; B3GNT2; PRL; PIK3CD; MR1; ZSWIM5; EPHA6; CDH1; FGFR1; IFNA17; HMG20A; CLN8; KRTAP1-1; NPR2; CXADR; ATP1B2; FXR1; NKX6-1; AKAP6; BMP1; CSPG5; ROBO1; KIF5C; EGFL7; FKBPL; DND1; NPY; RNF103; PAPPA2; GREM2; ACVR1C; PLCB1; GLIS2; NKX2-3; HPGD; HOXA6; SOHLH1; KRTAP4-6; ITPKA; EN1; LSR; NR5A2; PIK3R1; EDARADD; CTLA4; DNAJC30; TTC8; …	5363	5356
0.0327194	0.126683	GO:0050673	b	2	epithelial cell proliferation	567; 947; 949; 2260; 135228; 4825; 5293; 5617; 5828; 6356; 55679; 51162; 6091; 64127	CCL11; PEX2; ROBO1; PIK3CD; CD109; NOD2; CD34; LIMS2; B2M; PRL; EGFL7; FGFR1; SCARB1; NKX6-1	390	390
0.0373945	0.141164	GO:0048532	b	2	anatomical structure arrangement	91584; 28514	DLL1; PLXNA4	15	15
0.000242986	0.149	GO:0042113	b	4	B cell activation	596; 1380; 1493; 2322; 3451; 5293; 5295; 10039; 11314; 55795; 159296; 28420; 28434; 28448; 28452; 28514; 390530; 64127	CR2; CTLA4; IGHV1OR21-1; IGHV3-7; IGHV3-15; PCID2; PIK3CD; PARP3; DLL1; IGHV3-53; IGHV3-33; PIK3R1; NOD2; NKX2-3; CD300A; IFNA17; FLT3; BCL2	337	337
0.000706137	0.149	GO:0016477	b	4	cell migration	481; 482; 596; 947; 949; 977; 999; 1088; 1525; 1601; 1803; 1942; 2043; 2260; 2650; 2838; 3480; 4041; 4825; 5028; 5217; 5293; 5295; 6091; 6356; 6367; 7130; 8717; 9350; 10461; 10509; 10769; 11117; 11314; 23236; 79834; 22854; 23286; 23428; 91584; 59277; 27302; 81029; 159296; 28420; 28434; 28452; 130399; 28791; 64127	GPR15; SLC7A8; EPHA4; CD34; CD151; IGHV3-53; BMP10; IGHV3-33; CER1; DAB2; SEMA4B; IGLV3-27; GCNT1; NTNG1; IGHV3-7; WWC1; PEAK1; PIK3CD; TRADD; PIK3R1; NOD2; CDH1; CEACAM8; FGFR1; DPP4; PLCB1; IGF1R; PLK2; CCL11; ATP1B2; EFNA1; ATP1B1; MERTK; NKX2-3; P2RY1; NKX6-1; CXADR; CCL22; EMILIN1; LRP5; ROBO1; SCARB1; TNFAIP6; NTN4; PLXNA4; PFN2; WNT5B; CD300A; ACVR1C; BCL2	1521	1519
0.000707979	0.149	GO:0007411	b	4	axon guidance	1942; 2043; 3800; 4756; 5293; 5295; 6091; 6711; 8399; 10509; 10678; 285220; 91584; 59277; 57643	EPHA4; PLA2G10; B3GNT2; ROBO1; EPHA6; KIF5C; PIK3CD; EFNA1; PLXNA4; ZSWIM5; NEO1; PIK3R1; NTN4; SEMA4B; SPTBN1	278	278
0.000877763	0.149	GO:0043902	b	4	positive regulation of multi-organism process	2494; 4843; 5021; 5028; 5434; 5465; 5886; 8399; 9150; 338322; 23236; 64127	PLCB1; NOS2; PLA2G10; RAD23A; OXTR; CTDP1; POLR2E; NR5A2; PPARA; P2RY1; NOD2; NLRP10	198	198
0.000266104	0.152211	GO:0043462	b	5	regulation of ATPase activity	131118; 481; 482; 4057; 5217; 51726; 23234; 169200	TMEM64; DNAJC9; ATP1B2; DNAJB11; ATP1B1; PFN2; LTF; DNAJC19	81	81
0.00121644	0.15279	GO:0046649	b	4	lymphocyte activation	567; 596; 944; 977; 1380; 1493; 1525; 1803; 2322; 3140; 3451; 3821; 4860; 5293; 5295; 6504; 10039; 10461; 11314; 81609; 55795; 159296; 28420; 28434; 28448; 28452; 28514; 390530; 64127	IGHV1OR21-1; IGHV3-15; CD151; B2M; IGHV3-33; NKX2-3; FLT3; IGHV3-7; PIK3CD; MR1; TNFSF8; PIK3R1; NOD2; IFNA17; KLRC1; CTLA4; PARP3; DLL1; MERTK; CR2; CXADR; DPP4; PNP; PCID2; IGHV3-53; CD300A; SNX27; SLAMF1; BCL2	762	762
0.00139397	0.15279	GO:0051241	b	4	negative regulation of multicellular organismal process	482; 567; 596; 671; 947; 1493; 1942; 2043; 4041; 4057; 51316; 4825; 4882; 5021; 5217; 5295; 5465; 5617; 6091; 6356; 55679; 6504; 9150; 9350; 10039; 10363; 10401; 10461; 10509; 10769; 11117; 114990; 51460; 23286; 27257; 27302; 28514; 130399; 64127; 169200	ACVR1C; BPI; EPHA4; CD34; CTDP1; LIMS2; SFMBT1; B2M; BMP10; CER1; SEMA4B; PRL; WWC1; PIK3R1; NOD2; HMG20A; CTLA4; NPR2; PLK2; VASN; PLAC8; ATP1B2; LSM1; EFNA1; PARP3; DLL1; LTF; MERTK; PPARA; NKX6-1; CCL11; TMEM64; EMILIN1; LRP5; ROBO1; PIAS3; PFN2; OXTR; SLAMF1; BCL2	1181	1178
0.00175736	0.15279	GO:0046903	b	4	secretion	291; 567; 671; 932; 947; 966; 1088; 1675; 1803; 2029; 2215; 2990; 3903; 4041; 4057; 135228; 51316; 4825; 4843; 4860; 5021; 5028; 5293; 5617; 5908; 6510; 7130; 8399; 9463; 10461; 10675; 10694; 11314; 1508; 78991; 4646; 57553; 285381; 84062; 51646; 55450; 22927; 23086; 23178; 56670; 341359; 130399	ACVR1C; BPI; CD59; CD34; RAP1B; FCGR3B; HABP4; B2M; LAIR1; MYO6; MS4A3; YPEL5; CCT8; PLAC8; PASK; PIK3CD; SYT10; MICAL3; ENSA; CEACAM8; DPP4; CSPG5; SUCNR1; GUSB; PCYOX1L; NOS2; CTSB; SLC25A4; LTF; MERTK; DTNBP1; P2RY1; NKX6-1; DPH3; PLA2G10; PRL; LRP5; PNP; CFD; TNFAIP6; PICK1; OXTR; SLC1A5; CAMK2N1; CD300A; CD109; EXPH5	1469	1466
0.00180018	0.15279	GO:0034446	b	4	substrate adhesion-dependent cell spreading	1942; 5295; 55679; 10461; 10675; 79834; 22854; 59277	PIK3R1; PEAK1; CSPG5; NTN4; EFNA1; LIMS2; MERTK; NTNG1	108	108
0.0421643	0.155288	GO:0044406	b	2	adhesion of symbiont to host	949; 4057	SCARB1; LTF	16	16
0.0443222	0.159349	GO:0006950	b	2	response to stress	55655; 481; 567; 596; 671; 722; 944; 947; 949; 966; 977; 1380; 1491; 1493; 1571; 1611; 1675; 1803; 1824; 1990; 2043; 2907; 2966; 3075; 3140; 3451; 3480; 3508; 3821; 4057; 135228; 4313; 135458; 51316; 168448; 4843; 4913; 5021; 5028; 5293; 5295; 5434; 5465; 5732; 5886; 6035; 6356; 6367; 6498; 6504; 6775; 7130; 7837; 7844; 7975; 7984; 8087; 8399; 8460; 8717; 8858; 9435; 9463; 253461; 140881; 10039; …	IGHV1OR21-1; IGHV3-15; PLK2; CD34; GLRX2; B2M; MAFK; IGHV3-7; ARHGEF5; PIK3CD; MR1; PTGER2; IFNA17; CLN8; RNASE1; IGF1R; CTSB; ATP1B1; FXR1; IGHMBP2; SCARB1; IGLV3-27; RNF103; NTHL1; CD300A; PAPPA2; PXDN; HUS1B; PLCB1; CD151; APOA5; C4BPA; ZBTB38; DNAJB11; PIK3R1; CCL22; TXNRD2; CTLA4; NUPR2; PARP3; POLR2E; DCUN1D5; PPARA; CHST2; CR2; PLA2G10; PROZ; TNFAIP6; CDC14C; CYP2E1; WNT5B; MEIOC; SESN1; R…	4192	4187
0.00226631	0.161668	GO:0051093	b	4	negative regulation of developmental process	482; 567; 596; 1493; 1942; 2043; 4041; 4057; 51316; 4825; 4882; 5295; 5465; 5617; 6091; 6356; 55679; 6498; 9150; 9350; 10039; 10363; 10401; 10509; 10769; 11117; 114990; 51460; 23286; 27257; 28514; 130399; 169200	ACVR1C; EPHA4; CTDP1; LIMS2; SFMBT1; B2M; CER1; SEMA4B; PRL; WWC1; PIK3R1; HMG20A; CTLA4; NPR2; PLK2; VASN; ATP1B2; LSM1; EFNA1; PARP3; DLL1; LTF; PPARA; NKX6-1; CCL11; TMEM64; EMILIN1; LRP5; ROBO1; PIAS3; PLAC8; BCL2; SKIL	946	943
0.00248236	0.161668	GO:0061113	b	4	pancreas morphogenesis	1990; 2494	NR5A2; CELA1	4	4
0.00289025	0.161668	GO:0002521	b	4	leukocyte differentiation	567; 596; 944; 1380; 1493; 2322; 3140; 3451; 3821; 4057; 135228; 4860; 5293; 5295; 9398; 10401; 10461; 55795; 159296; 28514; 169200	CR2; CTLA4; CD101; TMEM64; KLRC1; MERTK; DLL1; PNP; CD109; PCID2; PIK3CD; MR1; PIAS3; B2M; TNFSF8; LTF; PIK3R1; NKX2-3; IFNA17; FLT3; BCL2	523	521
0.00305988	0.161668	GO:0030098	b	4	lymphocyte differentiation	567; 596; 944; 1380; 1493; 2322; 3140; 3451; 3821; 4860; 5293; 5295; 10461; 55795; 159296; 28514	CR2; CTLA4; KLRC1; MERTK; PNP; PCID2; PIK3CD; MR1; DLL1; B2M; TNFSF8; PIK3R1; NKX2-3; IFNA17; FLT3; BCL2	355	355
0.00330493	0.161668	GO:0070831	b	4	basement membrane assembly	7837; 22854; 59277	NTN4; NTNG1; PXDN	15	15
0.00384222	0.161668	GO:2000257	b	4	regulation of protein activation cascade	722; 966; 1380; 3075; 28420; 28434; 28452; 28791	CR2; IGHV3-7; CFH; C4BPA; CD59; IGLV3-27; IGHV3-53; IGHV3-33	122	122
0.00400585	0.161668	GO:0006957	b	4	complement activation, alternative pathway	1380; 1675; 3075	CR2; CFD; CFH	16	16
0.00424358	0.161668	GO:0055006	b	4	cardiac cell development	1525; 4703; 5465; 9150; 9472; 27302	CXADR; AKAP6; NEB; CTDP1; BMP10; PPARA	74	74
0.00461484	0.161668	GO:0090287	b	4	regulation of cellular response to growth factor stimulus	1601; 2260; 135228; 4756; 5465; 6091; 6498; 9350; 11117; 143282; 114990; 28514; 64388	GREM2; VASN; EMILIN1; ROBO1; CD109; CER1; DLL1; NEO1; FGFBP3; SKIL; PPARA; DAB2; FGFR1	273	273
0.00466741	0.161668	GO:0008015	b	4	blood circulation	481; 482; 947; 1129; 1525; 1824; 4041; 4843; 4852; 4882; 5021; 5028; 5465; 5732; 79041; 143282; 55450; 56670; 27302; 28514	ATP1B2; CXADR; NOS2; NPR2; LRP5; CD34; PPARA; DSC2; CHRM2; PTGER2; ATP1B1; DLL1; BMP10; NPY; SUCNR1; OXTR; TMEM38A; CAMK2N1; P2RY1; FGFBP3	508	508
0.00475365	0.161668	GO:0016192	b	4	vesicle-mediated transport	567; 671; 722; 932; 949; 966; 977; 1088; 1601; 1675; 2215; 2966; 2990; 3480; 3797; 3800; 3903; 4041; 4057; 135228; 51316; 4860; 5028; 5293; 5295; 5908; 6504; 6711; 7130; 8858; 9322; 9372; 9463; 9495; 10239; 10461; 10675; 10694; 116519; 11314; 1508; 78991; 4646; 81609; 29993; 114804; 57553; 84062; 51646; 84984; 80055; 22927; 23086; 341359; 28420; 28434; 28448; 28452; 28514; 28791; 390530; 64127	PGAP1; TNFAIP6; IGHV1OR21-1; BPI; HABP4; CD59; RAP1B; FCGR3B; AP3S2; CD151; B2M; LAIR1; APOA5; DAB2; MYO6; MS4A3; SPTBN1; YPEL5; CCT8; IGHV3-7; C4BPA; IGLV3-27; PIK3CD; IGHV3-15; SYT10; MICAL3; PIK3R1; NOD2; CEACAM8; PACSIN1; RNF157; GUSB; PCYOX1L; IGF1R; GTF2H2; CTSB; CD109; DLL1; LTF; MERTK; DTNBP1; TRIP10; IGHV3-53; P2RY1; KIF3C; CSPG5; AKAP5; CEP19; PROZ; LRP5; PNP; CFD; KIF5C; PICK1; SNX27; …	2167	2163
0.00476195	0.161668	GO:0048638	b	4	regulation of developmental growth	596; 51316; 4825; 5465; 5617; 9150; 9472; 10509; 23236; 114804; 23286; 91584; 27302; 28514	PLCB1; AKAP6; PLAC8; WWC1; PPARA; CTDP1; DLL1; PLXNA4; PRL; SEMA4B; BCL2; BMP10; RNF157; NKX6-1	306	306
0.00540944	0.166466	GO:2000026	b	4	regulation of multicellular organismal development	482; 567; 596; 649; 947; 1491; 1493; 1601; 1942; 1990; 2043; 2260; 3706; 4057; 135228; 4825; 4860; 4958; 5021; 5293; 5295; 5465; 5617; 6091; 6356; 55679; 6498; 6660; 8717; 9150; 9350; 9398; 9472; 10039; 10363; 10401; 10509; 10769; 11117; 23236; 80326; 29993; 114804; 114990; 51460; 8820; 22854; 55795; 57633; 91584; 59277; 57643; 27257; 27302; 81029; 28514; 130399; 63943; 169200	ACVR1C; PLCB1; HESX1; EPHA4; CD34; CTDP1; LIMS2; SFMBT1; B2M; BMP10; CER1; DAB2; SKIL; PLXNA4; CTH; SEMA4B; SOX5; CELA1; NTNG1; PRL; PIK3CD; TRADD; ITPKA; ZSWIM5; PIK3R1; NKX6-1; PACSIN1; HMG20A; CTLA4; PLK2; VASN; ATP1B2; AKAP6; EFNA1; PARP3; DLL1; LTF; PPARA; LSM1; FKBPL; FGFR1; CCL11; CD101; TMEM64; EMILIN1; BMP1; OMD; ROBO1; PNP; CD109; PCID2; NTN4; LRRN1; RNF157; PIAS3; OXTR; WNT5B; WNT10A; …	2053	2050
0.00557584	0.166466	GO:0002275	b	4	myeloid cell activation involved in immune response	567; 671; 932; 966; 1088; 1675; 2215; 2990; 3903; 4057; 51316; 4860; 5293; 5908; 6504; 7130; 10694; 11314; 1508; 51646; 56670	YPEL5; CCT8; TNFAIP6; SUCNR1; BPI; PLAC8; CFD; CD59; PIK3CD; RAP1B; FCGR3B; CTSB; B2M; LAIR1; LTF; PNP; CEACAM8; CD300A; MS4A3; SLAMF1; GUSB	554	552
0.00563875	0.166466	GO:0051240	b	4	positive regulation of multicellular organismal process	55655; 482; 567; 596; 649; 947; 949; 1376; 1491; 1601; 1990; 2043; 2260; 3480; 3706; 4041; 4057; 4160; 51316; 4825; 4860; 5021; 5028; 5293; 5295; 5434; 5617; 5732; 6091; 6356; 6498; 6660; 6711; 8717; 9398; 9472; 338322; 10769; 116519; 23236; 29993; 114804; 55795; 57633; 91584; 27302; 26007; 81029; 28514; 64127; 169200	FGFR1; EPHA4; CD34; B2M; BMP10; TRADD; APOA5; DAB2; SKIL; CTH; MC4R; SOX5; TKFC; NLRP2; PLAC8; CPT2; PIK3CD; PTGER2; ITPKA; SPTBN1; PIK3R1; NOD2; CELA1; PACSIN1; RNF157; PLCB1; IGF1R; PLK2; ATP1B2; AKAP6; POLR2E; DLL1; LTF; NLRP10; P2RY1; NKX6-1; CCL11; CD101; TMEM64; PRL; BMP1; LRP5; ROBO1; PNP; SCARB1; PCID2; LRRN1; PLXNA4; OXTR; WNT5B; BCL2	1722	1722
0.00613608	0.166512	GO:0048858	b	4	cell projection morphogenesis	596; 1942; 2043; 3706; 3800; 4756; 4825; 5293; 5295; 6091; 6498; 6711; 8399; 10509; 10675; 10678; 285220; 29993; 114804; 84062; 22854; 91584; 59277; 57643	EPHA6; EPHA4; SEMA4B; SPTBN1; NTNG1; B3GNT2; PIK3CD; ITPKA; ZSWIM5; NEO1; PIK3R1; PACSIN1; RNF157; EFNA1; SKIL; DTNBP1; NKX6-1; PLA2G10; CSPG5; ROBO1; KIF5C; NTN4; PLXNA4; BCL2	666	666
0.00662121	0.166512	GO:0097062	b	4	dendritic spine maintenance	3480; 3706; 9463	ITPKA; IGF1R; PICK1	19	19
0.00720122	0.166512	GO:0060627	b	4	regulation of vesicle-mediated transport	567; 722; 949; 977; 1601; 5028; 5908; 9463; 9495; 10461; 10675; 116519; 11314; 29993; 84062; 80055; 23086; 341359; 28514; 64127	PGAP1; AKAP5; CD300A; CSPG5; C4BPA; SCARB1; DTNBP1; RAP1B; NOD2; PICK1; CD151; B2M; SYT10; EXPH5; MERTK; APOA5; DAB2; P2RY1; PACSIN1; DLL1	530	529
0.00746517	0.166512	GO:0098657	b	4	import into cell	481; 482; 567; 722; 949; 977; 1601; 2966; 3772; 4041; 5295; 6504; 6510; 9322; 9372; 9463; 10461; 116519; 11314; 2055; 4646; 29993; 23428; 222962; 28420; 28434; 28448; 28452; 28514; 28791; 390530; 64116; 64127	SLC7A8; IGHV3-15; MYO6; CD151; B2M; SLC29A4; IGHV3-33; APOA5; DAB2; IGHV1OR21-1; IGHV3-7; C4BPA; PIK3R1; NOD2; PACSIN1; CLN8; KCNJ15; GTF2H2; ATP1B2; ATP1B1; SLC39A8; DLL1; MERTK; TRIP10; IGHV3-53; LRP5; SCARB1; PICK1; IGLV3-27; ZFYVE9; SLC1A5; CD300A; SLAMF1	1021	1021
0.00755086	0.166512	GO:0009914	b	4	hormone transport	291; 1803; 2029; 4041; 4825; 4843; 5028; 9463; 114571; 55450; 23178; 23428; 222962; 130399	NOS2; ACVR1C; SLC7A8; LRP5; PASK; PICK1; SLC25A4; SLC29A4; ENSA; CAMK2N1; P2RY1; DPP4; SLC22A9; NKX6-1	323	323
0.00777034	0.166512	GO:0006796	b	4	phosphate-containing compound metabolic process	131118; 98; 481; 596; 949; 1024; 1601; 1942; 2026; 2029; 2043; 2260; 2322; 3451; 3480; 3706; 3991; 4041; 4057; 135228; 168448; 4843; 4860; 4882; 4913; 5021; 5028; 5129; 5198; 5217; 5283; 5293; 5295; 5465; 5525; 5570; 5783; 5908; 6091; 6356; 6367; 6504; 6711; 7084; 7984; 8087; 91272; 8399; 8460; 8821; 9150; 9463; 9989; 10040; 10157; 10461; 10654; 10769; 116519; 11117; 11314; 11329; 2055; 23236; 28…	PGAP1; PLK2; PPP4R1; DAB2; BOD1; WWC1; ARHGEF5; PIK3CD; INPP4B; ENSA; IFNA17; PFAS; CLN8; NPR2; LIPE; PASK; FXR1; FGFR1; ACYP2; PTPN13; SCARB1; PKIB; ROBO1; NTHL1; CD300A; RASGRP3; ACVR1C; HESX1; DCLK2; APOA5; TPST1; ITPKA; PIK3R1; CCL22; PLCB1; DNAJC30; TK2; PPARA; PLA2G10; CDC14C; TKFC; PFN2; STK38; PPP2R5A; ACP6; EPHA6; EPHA4; DTNBP1; RAP1B; CTDP1; FLT3; P2RY1; NMNAT3; DBNDD1; SULT1A4; EFNA1; …	3342	3338
0.00800945	0.166512	GO:0051049	b	4	regulation of transport	291; 481; 482; 567; 596; 722; 947; 949; 977; 999; 1601; 1803; 2029; 3772; 4041; 4825; 4843; 5021; 5028; 5295; 5465; 5617; 5908; 79041; 7984; 8399; 8645; 9463; 9472; 9495; 10461; 10675; 116519; 11314; 440699; 4646; 29993; 285381; 84062; 84277; 51582; 80055; 55450; 23086; 23178; 23286; 341359; 28514; 130399; 64127	PGAP1; SLC25A4; ACVR1C; DTNBP1; CD34; RAP1B; MYO6; CD151; B2M; KCNK5; APOA5; DAB2; TMEM38A; PRL; PASK; ARHGEF5; SYT10; ENSA; PIK3R1; NOD2; CDH1; DPP4; NOS2; KCNJ15; DNAJC30; OXTR; ATP1B2; ATP1B1; LRRC52; DLL1; EXPH5; MERTK; PPARA; P2RY1; NKX6-1; AKAP5; AKAP6; DPH3; PLA2G10; LRP5; PACSIN1; SCARB1; CSPG5; AZIN1; PICK1; C4BPA; CAMK2N1; CD300A; WWC1; BCL2	1715	1713
0.00811617	0.166512	GO:0032990	b	4	cell part morphogenesis	596; 1942; 2043; 3706; 3800; 4756; 4825; 5293; 5295; 6091; 6498; 6711; 8399; 10509; 10675; 10678; 285220; 29993; 114804; 84062; 22854; 91584; 59277; 57643	EPHA6; EPHA4; SEMA4B; SPTBN1; NTNG1; B3GNT2; PIK3CD; ITPKA; ZSWIM5; NEO1; PIK3R1; PACSIN1; RNF157; EFNA1; SKIL; DTNBP1; NKX6-1; PLA2G10; CSPG5; ROBO1; KIF5C; NTN4; PLXNA4; BCL2	682	682
0.0083271	0.166512	GO:1901998	b	4	toxin transport	4041; 10694; 23428; 222962	CCT8; SLC29A4; SLC7A8; LRP5	39	39
0.00832843	0.166512	GO:0002366	b	4	leukocyte activation involved in immune response	567; 671; 932; 966; 1088; 1675; 2215; 2990; 3451; 3903; 4057; 51316; 4860; 5293; 5908; 6504; 7130; 10039; 10694; 11314; 1508; 51646; 56670; 159296; 28514	BPI; CD59; RAP1B; FCGR3B; B2M; LAIR1; NKX2-3; MS4A3; YPEL5; CCT8; PLAC8; PIK3CD; CEACAM8; IFNA17; SUCNR1; GUSB; CTSB; PARP3; DLL1; LTF; PNP; CFD; TNFAIP6; CD300A; SLAMF1	723	721
0.00833785	0.166512	GO:0060405	b	4	regulation of penile erection	5021; 5028	P2RY1; OXTR	7	7
0.00905989	0.175762	GO:0051050	b	4	positive regulation of transport	481; 482; 567; 596; 947; 977; 999; 1601; 4825; 5021; 5028; 5295; 5617; 7984; 8399; 9463; 9472; 9495; 10461; 116519; 440699; 84062; 51582; 80055; 55450; 23086; 341359; 28514; 64127	PGAP1; CD34; CD151; B2M; DAB2; APOA5; PRL; ARHGEF5; SYT10; PIK3R1; NOD2; CDH1; ATP1B2; ATP1B1; LRRC52; DLL1; EXPH5; MERTK; DTNBP1; P2RY1; NKX6-1; AKAP5; AKAP6; PLA2G10; AZIN1; PICK1; OXTR; CAMK2N1; BCL2	880	879
0.00934621	0.17628	GO:0046486	b	4	glycerolipid metabolic process	131118; 949; 1571; 2166; 3706; 3991; 5283; 5293; 5295; 5783; 8399; 8821; 116519; 23236; 51205; 80055; 159296	PGAP1; PLCB1; ACP6; LIPE; PIGH; SCARB1; PIK3CD; INPP4B; CYP2E1; ITPKA; PTPN13; PLA2G10; PIK3R1; APOA5; FAAH; NKX2-3; DNAJC19	435	435
0.00975165	0.178956	GO:0060249	b	4	anatomical structure homeostasis	482; 567; 596; 947; 1525; 4057; 4160; 135458; 5028; 5570; 10039; 10694; 2055; 124220; 64116; 64127; 169200	HUS1B; CXADR; CCT8; CLN8; ATP1B2; CD34; PKIB; PARP3; SLC39A8; B2M; TMEM64; LTF; NOD2; ZG16B; P2RY1; MC4R; BCL2	437	437
0.000734449	0.183299	GO:0097485	b	3	neuron projection guidance	1942; 2043; 3800; 4756; 5293; 5295; 6091; 6711; 8399; 10509; 10678; 285220; 91584; 59277; 57643	EPHA4; PLA2G10; B3GNT2; ROBO1; EPHA6; KIF5C; PIK3CD; EFNA1; PLXNA4; ZSWIM5; NEO1; PIK3R1; NTN4; SEMA4B; SPTBN1	279	279
0.00114588	0.183299	GO:0048518	b	3	positive regulation of biological process	55655; 481; 482; 567; 596; 649; 722; 944; 947; 949; 966; 977; 999; 1024; 1376; 1380; 1491; 1493; 1601; 1611; 1675; 1803; 1942; 1990; 2019; 2037; 2043; 2260; 2322; 2494; 2622; 2966; 3075; 3140; 3248; 3299; 3451; 3480; 3641; 3706; 4041; 4057; 4160; 4313; 51316; 168448; 4756; 4825; 4843; 4852; 4860; 4882; 5021; 5028; 5217; 5293; 5295; 5434; 5465; 5525; 5570; 5617; 5732; 5886; 5908; 6091; 6356; 6367;…	PGAP1; HSF4; IGHV1OR21-1; IGHV3-15; PLK2; CD34; B2M; ANKIB1; DAB2; SEMA4B; EXPH5; ZBTB38; PRL; WWC1; ARHGEF5; PIK3CD; MR1; PTGER2; FGFBP3; CDH1; FGFR1; IFNA17; NPR2; STAMBP; CTSB; NOD2; ATP1B2; ATP1B1; FXR1; CENPQ; NKX6-1; AKAP5; AKAP6; BMP1; CSPG5; ROBO1; PACSIN1; SCARB1; PKIB; IGLV3-27; GALR3; DND1; NPY; CD300A; ACVR1C; PLCB1; GLIS2; MCF2L; HABP4; CD151; NKX2-3; APOA5; MC4R; EGFL7; CCT8; C4BPA;…	6243	6239
0.00158489	0.183299	GO:0051239	b	3	regulation of multicellular organismal process	55655; 481; 482; 567; 596; 649; 671; 947; 949; 1129; 1376; 1491; 1493; 1525; 1601; 1824; 1942; 1990; 2043; 2260; 3480; 3706; 4041; 4057; 135228; 4160; 51316; 4825; 4843; 4860; 4882; 4958; 5021; 5028; 5217; 5293; 5295; 5434; 5465; 5617; 5732; 22854; 6091; 6356; 55679; 6498; 6504; 79041; 6660; 6711; 8717; 9150; 9350; 9398; 9472; 10039; 10363; 10401; 10461; 10509; 338322; 10643; 10769; 116519; 11117…	PLK2; CD34; SFMBT1; B2M; DAB2; SEMA4B; NTNG1; WNT10A; WWC1; CPT2; PIK3CD; PTGER2; ZSWIM5; FGFR1; HMG20A; NPR2; CXADR; ATP1B2; PASK; NKX6-1; AKAP6; BMP1; FKBPL; SCARB1; OMD; ROBO1; ACVR1C; CTLA4; HESX1; APOA5; MC4R; PLAC8; ITPKA; PIK3R1; PLCB1; CHRM2; POLR2E; PPARA; PARP3; TMEM64; PCID2; TKFC; PFN2; PRL; WNT5B; DSC2; EPHA4; CTDP1; CTH; TMEM38A; P2RY1; NLRP2; TRADD; RNF157; EFNA1; DLL1; LTF; MERTK;…	3158	3155
0.00236607	0.183299	GO:0032879	b	3	regulation of localization	291; 481; 482; 567; 596; 722; 947; 949; 977; 999; 1601; 1803; 1824; 1942; 2029; 2037; 2260; 2622; 3480; 3772; 4041; 4825; 4843; 5021; 5028; 5217; 5293; 5295; 5465; 5525; 5617; 5908; 22854; 6091; 6356; 79041; 6711; 7130; 7984; 8399; 8645; 8717; 9463; 9472; 9495; 10461; 10509; 10675; 10694; 10769; 116519; 11117; 11314; 80055; 23236; 440699; 4646; 29993; 285381; 84062; 84277; 51582; 84662; 55166; 55…	PLK2; PGAP1; ACVR1C; GLIS2; PIK3CD; CSPG5; CD34; NOS2; MYO6; CD151; B2M; BMP10; KCNK5; APOA5; DAB2; SEMA4B; CENPQ; SPTBN1; TMEM38A; CCT8; P2RY1; NTNG1; C4BPA; PASK; ARHGEF5; DSC2; TRADD; ZSWIM5; SYT10; WWC1; ENSA; PIK3R1; NOD2; CDH1; FGFR1; DPP4; PLCB1; IGF1R; EPB41L2; KCNJ15; AKAP5; DNAJC30; ATP1B2; EFNA1; ATP1B1; LRRC52; DLL1; RAP1B; EXPH5; MERTK; PPARA; SLC25A4; DTNBP1; NKX6-1; CCL11; AKAP6; D…	2686	2684
0.00250408	0.183299	GO:0006956	b	3	complement activation	722; 966; 1380; 1675; 3075; 390530; 28420; 28434; 28448; 28452; 28791	CR2; CFH; IGHV1OR21-1; IGHV3-15; C4BPA; CFD; CD59; IGLV3-27; IGHV3-53; IGHV3-33; IGHV3-7	195	195
0.0103271	0.184529	GO:0002455	b	4	humoral immune response mediated by circulating immunoglobulin	722; 1380; 28420; 28434; 28448; 28452; 28791; 390530; 64127	CR2; IGHV1OR21-1; IGHV3-7; IGHV3-15; C4BPA; IGLV3-27; IGHV3-53; IGHV3-33; NOD2	174	174
0.010615	0.18481	GO:0007167	b	4	enzyme linked receptor protein signaling pathway	1601; 1942; 2043; 2260; 2322; 3248; 3480; 135228; 4313; 4756; 4882; 5293; 5295; 5434; 5465; 5617; 6091; 6461; 6498; 8717; 9350; 9372; 10461; 11117; 143282; 23236; 285220; 114990; 8820; 27302; 28514; 130399; 64388	ACVR1C; HESX1; EPHA6; EPHA4; NPR2; ZFYVE9; BMP10; CER1; DAB2; FLT3; PRL; PIK3CD; TRADD; HPGD; NEO1; FGFBP3; PIK3R1; GREM2; PLCB1; IGF1R; VASN; EFNA1; POLR2E; DLL1; SHB; SKIL; MERTK; PPARA; FGFR1; EMILIN1; ROBO1; CD109; MMP2	1047	1047
0.00339086	0.185	GO:0008217	b	3	regulation of blood pressure	947; 4041; 4843; 4852; 4882; 5021; 5465; 56670; 55450; 28514	NOS2; LRP5; PPARA; CD34; NPR2; DLL1; NPY; OXTR; CAMK2N1; SUCNR1	174	174
0.00393744	0.185	GO:0007166	b	3	cell surface receptor signaling pathway	567; 596; 671; 944; 949; 966; 1380; 1493; 1601; 1675; 1942; 1990; 2043; 2215; 2260; 2322; 2622; 3248; 3451; 3480; 3821; 4041; 4057; 135228; 4313; 4756; 4825; 4843; 4882; 5021; 5028; 5293; 5295; 5434; 5465; 5617; 5908; 6091; 6356; 6367; 55679; 6461; 6498; 6504; 6775; 7433; 7837; 8717; 9350; 9372; 9398; 10401; 10461; 10509; 11117; 11314; 143282; 23236; 285220; 80114; 80326; 390530; 114990; 84662; 4…	EDARADD; NPR2; IGHV1OR21-1; PLCB1; BPI; EPHA6; EPHA4; NOS2; FCGR3B; LIMS2; ZFYVE9; B2M; BMP10; IGHV3-33; RBMS3; CER1; DAB2; NKX6-1; BICC1; FLT3; STAT4; ACVR1C; IGHV3-7; PIAS3; PRL; HESX1; IGLV3-27; PIK3CD; TRADD; HPGD; GLIS2; TNFSF8; FGFBP3; PIK3R1; VIPR1; PFDN5; FGFR1; IFNA17; KLRC1; CTLA4; IGF1R; CD59; VASN; SKIL; SULT1A4; WWC1; NOD2; GREM2; CD109; EFNA1; RAP1B; POLR2E; DLL1; SHB; TMEM64; LTF; …	3127	3125
0.00404372	0.185	GO:0002443	b	3	leukocyte mediated immunity	567; 671; 722; 932; 966; 1088; 1380; 1675; 2215; 2990; 3140; 3821; 3903; 4057; 51316; 4860; 5293; 5908; 7130; 10039; 10694; 11314; 1508; 390530; 51646; 28420; 28434; 28448; 28452; 28791; 64127	IGHV1OR21-1; BPI; CD59; RAP1B; FCGR3B; B2M; LAIR1; MS4A3; YPEL5; CCT8; IGHV3-7; C4BPA; PIK3CD; MR1; IGHV3-15; NOD2; CEACAM8; GUSB; KLRC1; CTSB; PARP3; LTF; CR2; PNP; CFD; TNFAIP6; IGHV3-53; IGLV3-27; PLAC8; IGHV3-33; CD300A	905	903
0.00576197	0.196213	GO:0003013	b	3	circulatory system process	481; 482; 947; 1129; 1525; 1824; 4041; 4843; 4852; 4882; 5021; 5028; 5465; 5732; 79041; 143282; 56670; 55450; 27302; 28514	ATP1B2; CXADR; NOS2; NPR2; LRP5; CD34; PPARA; DSC2; CHRM2; PTGER2; ATP1B1; DLL1; BMP10; NPY; SUCNR1; OXTR; TMEM38A; CAMK2N1; P2RY1; FGFBP3	518	518
0.00625143	0.196213	GO:0050794	b	3	regulation of cellular process	131118; 55655; 291; 481; 482; 567; 596; 649; 671; 722; 932; 944; 947; 949; 966; 977; 999; 1024; 1129; 1380; 1491; 1493; 1525; 1601; 1611; 1675; 1803; 1824; 1942; 1990; 2019; 2026; 2029; 2043; 2215; 2260; 2322; 2494; 2622; 2838; 2842; 2907; 2966; 3203; 3248; 3299; 3451; 3480; 3641; 3706; 3821; 4041; 4057; 135228; 4160; 197320; 4313; 135458; 51316; 168448; 4703; 4756; 4825; 4843; 4852; 4860; 4882; …	PGAP1; OR6C74; HSF5; HSF4; IGHV1OR21-1; IGHV3-15; OR3A4P; PLK2; CD34; PPP4R1; GLRX2; ZFYVE9; B2M; MAFK; ZNF600; ANKIB1; DAB2; SEMA4B; BICC1; MS4A3; NTNG1; EXPH5; ZBTB38; BOD1; PRL; WWC1; ARHGEF5; PIK3CD; INPP4B; PTGER2; ZSWIM5; FGFBP3; ENSA; EPHA6; CDH1; OR7D2; FGFR1; IFNA17; HMG20A; CLN8; NPR2; STAMBP; ZNF542P; CCL11; GRINA; NOD2; ATP1B2; ATP1B1; FXR1; NKX6-1; AKAP5; AKAP6; BMP1; CSPG5; PTPN13; …	11109	11094
0.00651173	0.196213	GO:0048731	b	3	system development	131118; 482; 567; 596; 649; 944; 947; 999; 81871; 1129; 1380; 1491; 1493; 1525; 1601; 1824; 1942; 1990; 2019; 2043; 2260; 2322; 2494; 2650; 3140; 3203; 3248; 3299; 3451; 3706; 3800; 3821; 4041; 4057; 135228; 4313; 4703; 4756; 4825; 4852; 4860; 4882; 4958; 5021; 5028; 5293; 5295; 5465; 5617; 22854; 6091; 6208; 6356; 55679; 6461; 6498; 6522; 6660; 6711; 7844; 7975; 8087; 8399; 8717; 9150; 9350; 939…	PGAP1; HSF4; PLK2; CD34; SFMBT1; B2M; MAFK; DAB2; SEMA4B; KRTAP4-6; NTNG1; B3GNT2; PRL; PIK3CD; MR1; ZSWIM5; EPHA6; CDH1; FGFR1; IFNA17; HMG20A; CLN8; KRTAP1-1; NPR2; CXADR; ATP1B2; FXR1; NKX6-1; AKAP6; BMP1; CSPG5; ROBO1; KIF5C; EGFL7; FKBPL; NPY; RNF103; PAPPA2; GREM2; ACVR1C; PLCB1; GLIS2; NKX2-3; HPGD; HOXA6; BICC1; ITPKA; EN1; LSR; NR5A2; PIK3R1; CTLA4; DNAJC30; PARP3; SHB; PPARA; CR2; TMEM6…	4796	4789
0.00668255	0.196213	GO:0048468	b	3	cell development	482; 567; 596; 999; 1525; 1942; 2019; 2043; 2260; 3299; 3706; 3800; 4041; 4057; 4703; 4756; 4825; 4852; 4882; 5293; 5295; 5465; 5908; 22854; 6091; 6356; 55679; 6498; 6711; 8399; 9150; 402381; 9463; 9472; 10363; 10461; 10509; 10675; 10678; 10769; 23236; 285220; 373863; 79834; 29993; 114804; 112724; 84062; 51599; 284071; 23086; 91584; 59277; 59335; 57643; 27257; 27302; 81029; 28514; 63948	MEIOC; HSF4; EPHA6; EPHA4; NEB; RAP1B; CTDP1; LIMS2; B2M; BMP10; CSPG5; SKIL; PLXNA4; SEMA4B; SPTBN1; NTNG1; B3GNT2; ZSWIM5; PEAK1; PIK3CD; SOHLH1; ITPKA; EN1; NEO1; LSR; PIK3R1; CDH1; FGFR1; PACSIN1; HMG20A; PLCB1; NPR2; PLK2; DMRTB1; CCL11; ATP1B2; LSM1; EFNA1; DLL1; EXPH5; LTF; MERTK; PPARA; PRDM12; DTNBP1; NKX6-1; CXADR; AKAP6; PLA2G10; LRP5; ROBO1; KIF5C; NTN4; PICK1; RNF157; DND1; NPY; RDH1…	2114	2113
0.00784702	0.196213	GO:0030154	b	3	cell differentiation	482; 567; 596; 649; 944; 947; 999; 81871; 1380; 1491; 1493; 1525; 1601; 1824; 1942; 1990; 2019; 2043; 2260; 2322; 2494; 3140; 3299; 3451; 3706; 3800; 3821; 4041; 4057; 135228; 4313; 51316; 4703; 4756; 4825; 4852; 4860; 4882; 5028; 5293; 5295; 5367; 5465; 5908; 22854; 6091; 6208; 6356; 55679; 6461; 6498; 6660; 6711; 8087; 8399; 9150; 402381; 9398; 9463; 9472; 10363; 10401; 10461; 10509; 10675; 106…	HSF4; PLK2; CD34; GLRX2; SFMBT1; B2M; DAB2; SEMA4B; NTNG1; B3GNT2; WNT10A; PIK3CD; MR1; ZSWIM5; EPHA6; CDH1; FGFR1; IFNA17; HMG20A; CLN8; KRTAP1-1; NPR2; CXADR; CTSB; ATP1B2; FXR1; NKX6-1; AKAP6; BMP1; CSPG5; ROBO1; KIF5C; EGFL7; DND1; NPY; ACVR1C; CTLA4; GLIS2; DMRTB1; NKX2-3; PLAC8; SOHLH1; KRTAP4-6; ITPKA; EN1; LSR; NR5A2; PIK3R1; EDARADD; PLCB1; LSM1; PMCH; SHB; PPARA; CR2; TMEM64; PLA2G10; P…	4189	4184
0.00842194	0.196213	GO:0019538	b	3	protein metabolic process	28; 55655; 420; 567; 596; 649; 722; 966; 999; 1024; 1380; 1491; 1601; 1611; 1675; 1803; 1942; 1990; 2029; 2043; 2260; 2289; 2322; 2650; 3075; 3299; 3451; 3480; 3508; 3706; 3991; 4041; 4057; 135228; 4313; 168448; 4843; 4882; 5021; 5028; 5069; 5129; 5217; 5283; 5293; 5295; 5465; 5525; 5570; 5617; 5783; 5828; 5875; 5886; 5908; 6091; 6208; 6227; 6356; 6367; 6504; 6711; 7681; 7844; 7984; 8087; 91272; …	PGAP1; HSF4; IGHV1OR21-1; IGHV3-15; PLK2; PPP4R1; GLRX2; FKBP5; B2M; ANKIB1; DAB2; B3GNT2; BOD1; PRL; WWC1; ARHGEF5; PIK3CD; ENSA; CDH1; IGHV3-7; IFNA17; HMG20A; CLN8; NPR2; EPHA4; LIPE; CTSB; PAPPA; FXR1; IGHMBP2; FGFR1; BMP1; CSPG5; PTPN13; RHBDL2; IGHV3-53; PKIB; IGLV3-27; ROBO1; CSTL1; DND1; RNF103; RNF7; CD300A; PAPPA2; RASGRP3; ACVR1C; PCYOX1L; HESX1; DCLK2; HABP4; APOA5; NGLY1; C4BPA; PASK…	5979	5974
0.00857576	0.196213	GO:0043900	b	3	regulation of multi-organism process	596; 2494; 4057; 4843; 4882; 5021; 5028; 5434; 5465; 5886; 8399; 9150; 338322; 23236; 26007; 130399; 64127	PLCB1; NOS2; P2RY1; PLA2G10; ACVR1C; RAD23A; PPARA; NPR2; TKFC; CTDP1; POLR2E; NR5A2; OXTR; NLRP10; BCL2; NOD2; LTF	431	431
0.00889316	0.196213	GO:0002263	b	3	cell activation involved in immune response	567; 671; 932; 966; 1088; 1675; 2215; 2990; 3451; 3903; 4057; 51316; 4860; 5293; 5908; 6504; 7130; 10039; 10694; 11314; 56670; 1508; 51646; 159296; 28514	BPI; CD59; RAP1B; FCGR3B; B2M; LAIR1; NKX2-3; MS4A3; YPEL5; CCT8; PLAC8; PIK3CD; CEACAM8; IFNA17; SUCNR1; GUSB; CTSB; PARP3; DLL1; LTF; PNP; CFD; TNFAIP6; CD300A; SLAMF1	727	725
0.00955831	0.196213	GO:0006959	b	3	humoral immune response	596; 671; 722; 966; 1380; 1675; 3075; 3451; 4057; 390530; 28420; 28434; 28448; 28452; 28791; 64127	CR2; IGHV1OR21-1; CFH; BPI; C4BPA; CFD; CD59; IGLV3-27; IGHV3-15; IGHV3-53; IGHV3-33; LTF; NOD2; IGHV3-7; IFNA17; BCL2	402	401
0.00964984	0.196213	GO:0006793	b	3	phosphorus metabolic process	131118; 98; 481; 596; 949; 1024; 1601; 1942; 2026; 2029; 2043; 2260; 2322; 3451; 3480; 3706; 3991; 4041; 4057; 135228; 168448; 4843; 4860; 4882; 4913; 5021; 5028; 5129; 5198; 5217; 5283; 5293; 5295; 5465; 5525; 5570; 5783; 5908; 6091; 6356; 6367; 6504; 6711; 7984; 8087; 91272; 8399; 8460; 8821; 9150; 9463; 7084; 9989; 10040; 10157; 10461; 10654; 10769; 116519; 11117; 11314; 11329; 80055; 2055; 23…	PGAP1; PLK2; PPP4R1; DAB2; BOD1; WWC1; ARHGEF5; PIK3CD; INPP4B; ENSA; IFNA17; PFAS; CLN8; NPR2; LIPE; PASK; FXR1; FGFR1; ACYP2; PTPN13; SCARB1; PKIB; ROBO1; NTHL1; CD300A; RASGRP3; ACVR1C; HESX1; DCLK2; APOA5; TPST1; ITPKA; PIK3R1; CCL22; PLCB1; DNAJC30; TK2; PPARA; PLA2G10; CDC14C; TKFC; PFN2; STK38; PPP2R5A; ACP6; EPHA6; EPHA4; DTNBP1; RAP1B; CTDP1; FLT3; P2RY1; NMNAT3; DBNDD1; SULT1A4; EFNA1; …	3370	3366
0.012136	0.20027	GO:0045055	b	4	regulated exocytosis	567; 671; 932; 966; 1088; 1675; 2215; 2990; 3903; 4057; 135228; 51316; 4860; 5028; 5293; 5908; 7130; 10675; 10694; 11314; 1508; 78991; 84062; 51646; 22927; 341359	BPI; CD59; RAP1B; FCGR3B; HABP4; B2M; LAIR1; MS4A3; YPEL5; CCT8; PLAC8; PIK3CD; SYT10; CEACAM8; GUSB; PCYOX1L; CTSB; LTF; DTNBP1; P2RY1; CSPG5; PNP; CFD; TNFAIP6; CD300A; CD109	786	783
0.0126099	0.20027	GO:0048522	b	4	positive regulation of cellular process	55655; 481; 482; 567; 596; 944; 947; 949; 977; 999; 1024; 1491; 1493; 1601; 1611; 1803; 1942; 1990; 2019; 2043; 2260; 2322; 2494; 2622; 2966; 3248; 3299; 3451; 3480; 3641; 3706; 4041; 4057; 4313; 51316; 168448; 4756; 4825; 4843; 4860; 4882; 5021; 5028; 5217; 5293; 5295; 5465; 5525; 5570; 5617; 5886; 5908; 6091; 6356; 6367; 55679; 6498; 6504; 6660; 6775; 7130; 7433; 7984; 8087; 8399; 8484; 8717; 9…	HSF4; IGHV1OR21-1; IGHV3-15; PLK2; CD34; B2M; ANKIB1; DAB2; SEMA4B; EXPH5; ZBTB38; PRL; WWC1; ARHGEF5; PIK3CD; FGFBP3; CDH1; FGFR1; IFNA17; NPR2; STAMBP; NOD2; ATP1B2; ATP1B1; FXR1; NKX6-1; AKAP5; AKAP6; CSPG5; ROBO1; PACSIN1; SCARB1; PKIB; GALR3; DND1; CD300A; ACVR1C; PLCB1; GLIS2; MCF2L; HABP4; CD151; NKX2-3; APOA5; EGFL7; CCT8; INSL4; PASK; HPGD; ITPKA; EN1; SYT10; NFE4; NR5A2; PIK3R1; ATP10A;…	5443	5439
0.0126631	0.20027	GO:1903530	b	4	regulation of secretion by cell	291; 947; 1803; 2029; 4041; 4825; 4843; 5021; 5028; 5908; 9463; 10675; 11314; 285381; 84062; 55450; 23086; 23178; 341359; 130399	NOS2; CD300A; ACVR1C; EXPH5; LRP5; PASK; CSPG5; CD34; RAP1B; SLC25A4; SYT10; DPH3; ENSA; OXTR; PICK1; CAMK2N1; P2RY1; DPP4; DTNBP1; NKX6-1	560	559
0.0126828	0.20027	GO:0035094	b	4	response to nicotine	567; 596; 4825; 5465	B2M; NKX6-1; PPARA; BCL2	44	44
0.0132162	0.200511	GO:0043312	b	4	neutrophil degranulation	567; 671; 932; 966; 1088; 1675; 2215; 2990; 3903; 4057; 51316; 4860; 5908; 7130; 10694; 11314; 1508; 51646	YPEL5; CCT8; TNFAIP6; BPI; PLAC8; CFD; CD59; RAP1B; FCGR3B; CTSB; B2M; LAIR1; LTF; PNP; CEACAM8; CD300A; MS4A3; GUSB	490	488
0.0134849	0.200511	GO:0051094	b	4	positive regulation of developmental process	482; 567; 596; 649; 947; 1491; 1601; 1990; 2043; 2260; 3299; 3706; 4041; 4057; 4825; 4860; 5021; 5293; 5617; 6091; 6356; 55679; 6498; 6660; 8399; 8717; 9398; 9472; 10675; 10769; 23236; 29993; 114804; 55795; 57633; 91584; 27302; 81029; 28514; 169200	PCID2; HSF4; EPHA4; CD34; LIMS2; B2M; BMP10; DAB2; SKIL; CTH; SOX5; CELA1; PRL; PIK3CD; TRADD; ITPKA; NKX6-1; PACSIN1; RNF157; PLCB1; PLK2; ATP1B2; AKAP6; DLL1; LTF; FGFR1; CCL11; CD101; TMEM64; PLA2G10; BMP1; LRP5; ROBO1; PNP; CSPG5; LRRN1; PLXNA4; OXTR; WNT5B; BCL2	1349	1349
0.0139082	0.200511	GO:0007144	b	4	female meiosis I	284071; 27030	MEIOC; MLH3	9	9
0.0139427	0.200511	GO:0030182	b	4	neuron differentiation	482; 567; 596; 999; 1942; 2019; 2043; 2260; 3706; 3800; 4756; 4825; 4852; 5293; 5295; 6091; 6498; 6711; 8399; 9463; 10363; 10509; 10678; 10769; 2055; 285220; 80326; 4646; 29993; 114804; 112724; 84062; 22854; 91584; 59277; 59335; 57643; 27257; 81029; 28514	EPHA6; EPHA4; MYO6; B2M; SEMA4B; PLXNA4; SPTBN1; NTNG1; B3GNT2; ZSWIM5; WNT10A; PIK3CD; ITPKA; EN1; NEO1; PIK3R1; CDH1; FGFR1; PACSIN1; HMG20A; CLN8; PLK2; ATP1B2; LSM1; EFNA1; DLL1; SKIL; DTNBP1; PRDM12; NKX6-1; PLA2G10; ROBO1; KIF5C; NTN4; PICK1; RNF157; NPY; RDH13; WNT5B; BCL2	1352	1352
0.0143466	0.200511	GO:0061049	b	4	cell growth involved in cardiac muscle cell development	5465; 9150; 9472	AKAP6; CTDP1; PPARA	25	25
0.0146253	0.200511	GO:0006644	b	4	phospholipid metabolic process	131118; 949; 2322; 3706; 5283; 5293; 5295; 5783; 8399; 8821; 10654; 116519; 2055; 23236; 51205; 80055; 64127	PGAP1; PLCB1; ACP6; PLA2G10; PIGH; PMVK; SCARB1; PIK3CD; INPP4B; ITPKA; PTPN13; PIK3R1; NOD2; APOA5; CLN8; FLT3; DNAJC19	457	457
0.0147652	0.200511	GO:0050919	b	4	negative chemotaxis	1803; 6091; 10509; 91584	ROBO1; SEMA4B; DPP4; PLXNA4	46	46
0.0153539	0.204418	GO:0051828	b	4	entry into other organism involved in symbiotic interaction	949; 999; 1380; 1525; 1803; 2838; 6504; 6510	CR2; CXADR; GPR15; SCARB1; CDH1; SLC1A5; DPP4; SLAMF1	155	155
0.0156631	0.204525	GO:2000243	b	4	positive regulation of reproductive process	5021; 5028; 8399; 23236; 284071	MEIOC; PLCB1; P2RY1; PLA2G10; OXTR	71	71
0.0173608	0.20788	GO:0002683	b	4	negative regulation of immune system process	671; 722; 966; 1493; 1803; 3821; 4057; 5295; 10039; 10401; 10461; 11117; 11314; 23236; 26007; 28514; 64127	KLRC1; CTLA4; MERTK; EMILIN1; PLCB1; BPI; C4BPA; CD59; TKFC; PARP3; PIAS3; LTF; PIK3R1; NOD2; CD300A; DPP4; DLL1	468	466
0.0175446	0.20788	GO:0048585	b	4	negative regulation of response to stimulus	596; 722; 947; 966; 1491; 1493; 1601; 1803; 1942; 2043; 2907; 2966; 3480; 3821; 4057; 135228; 5465; 6091; 6498; 6504; 7130; 7837; 8717; 9350; 10039; 10509; 10617; 10769; 11117; 11314; 11329; 80114; 114804; 114990; 84662; 55450; 23286; 27303; 26007; 28514; 51162; 5204; 64127; 64388; 169200; 27244	PLK2; GREM2; SESN1; STAMBP; EPHA4; CD34; RBMS3; CER1; DAB2; SEMA4B; CTH; C4BPA; WWC1; TRADD; BICC1; GLIS2; NOD2; PFDN5; DPP4; RNF157; KLRC1; CTLA4; IGF1R; CD59; VASN; GTF2H2; GRINA; EFNA1; PARP3; DLL1; TMEM64; LTF; PPARA; CD300A; EMILIN1; ROBO1; CD109; TNFAIP6; TKFC; EGFL7; PXDN; STK38; CAMK2N1; BCL2; SLAMF1; SKIL	1624	1623
0.0176358	0.20788	GO:0006958	b	4	complement activation, classical pathway	722; 1380; 28420; 28434; 28448; 28452; 28791; 390530	CR2; IGHV1OR21-1; IGHV3-7; IGHV3-15; C4BPA; IGLV3-27; IGHV3-53; IGHV3-33	159	159
0.0180243	0.20788	GO:0050821	b	4	protein stabilization	481; 482; 1942; 2043; 5217; 5295; 10694; 29974; 63943	CCT8; FKBPL; EPHA4; ATP1B2; EFNA1; ATP1B1; PFN2; PIK3R1; A1CF	191	191
0.0181607	0.20788	GO:0002274	b	4	myeloid leukocyte activation	567; 671; 932; 966; 1088; 1675; 2215; 2990; 3903; 4057; 51316; 4860; 5293; 5908; 6504; 7130; 8399; 10694; 11314; 1508; 51646; 56670	BPI; CD59; RAP1B; FCGR3B; B2M; LAIR1; MS4A3; YPEL5; CCT8; PLAC8; PIK3CD; CEACAM8; SUCNR1; GUSB; CTSB; LTF; PLA2G10; PNP; CFD; TNFAIP6; CD300A; SLAMF1	658	656
0.0182799	0.20788	GO:2000145	b	4	regulation of cell motility	482; 596; 949; 977; 999; 1601; 1803; 1942; 2260; 3480; 4825; 5217; 5293; 5295; 6091; 6356; 7130; 8717; 10509; 10769; 11117; 11314; 23236; 22854; 91584; 27302; 81029; 130399; 64127	ACVR1C; PLK2; CD151; BMP10; DAB2; SEMA4B; NTNG1; PIK3CD; TRADD; PIK3R1; NOD2; CDH1; FGFR1; DPP4; PLCB1; IGF1R; ATP1B2; EFNA1; NKX6-1; CCL11; EMILIN1; ROBO1; SCARB1; TNFAIP6; PLXNA4; PFN2; WNT5B; CD300A; BCL2	930	930
0.0184149	0.20788	GO:0035051	b	4	cardiocyte differentiation	1525; 4703; 5465; 9150; 9472; 27302; 28514	CXADR; AKAP6; NEB; CTDP1; DLL1; BMP10; PPARA	130	130
0.0187215	0.20788	GO:0036230	b	4	granulocyte activation	567; 671; 932; 966; 1088; 1675; 2215; 2990; 3903; 4057; 51316; 4860; 5908; 7130; 10694; 11314; 1508; 51646	YPEL5; CCT8; TNFAIP6; BPI; PLAC8; CFD; CD59; RAP1B; FCGR3B; CTSB; B2M; LAIR1; LTF; PNP; CEACAM8; CD300A; MS4A3; GUSB	509	507
0.0188343	0.20788	GO:0042742	b	4	defense response to bacterium	671; 944; 3140; 4057; 51316; 4843; 140881; 338322; 28420; 28434; 28448; 28452; 390530; 64127	NOS2; IGHV1OR21-1; IGHV3-7; BPI; PLAC8; MR1; IGHV3-15; IGHV3-53; TNFSF8; IGHV3-33; LTF; DEFB129; NOD2; NLRP10	363	362
0.0189816	0.20788	GO:0051270	b	4	regulation of cellular component movement	482; 596; 949; 977; 999; 1601; 1803; 1824; 1942; 2260; 3480; 4825; 5217; 5293; 5295; 6091; 6356; 7130; 8717; 10509; 10769; 11117; 11314; 23236; 22854; 91584; 57643; 27302; 81029; 130399; 64127	ACVR1C; PIK3CD; PLK2; CD151; BMP10; DAB2; SEMA4B; NTNG1; DSC2; TRADD; ZSWIM5; PIK3R1; NOD2; CDH1; FGFR1; DPP4; PLCB1; IGF1R; ATP1B2; EFNA1; NKX6-1; CCL11; EMILIN1; ROBO1; SCARB1; TNFAIP6; PLXNA4; PFN2; WNT5B; CD300A; BCL2	1013	1013
0.0195285	0.210474	GO:0002227	b	4	innate immune response in mucosa	4057; 4843; 64127	NOS2; LTF; NOD2	29	28
0.0200325	0.212532	GO:0070848	b	4	response to growth factor	1601; 2260; 2322; 3248; 135228; 4756; 5028; 5293; 5434; 5465; 6091; 6498; 6660; 9350; 9372; 11117; 143282; 80326; 114990; 27302; 28514; 130399; 64388	ACVR1C; ZFYVE9; BMP10; CER1; DAB2; FLT3; SOX5; WNT10A; PIK3CD; HPGD; NEO1; FGFBP3; GREM2; VASN; POLR2E; DLL1; SKIL; PPARA; P2RY1; FGFR1; EMILIN1; ROBO1; CD109	702	701
0.0110812	0.213459	GO:0042592	b	3	homeostatic process	481; 482; 567; 596; 947; 949; 1376; 1525; 2322; 2494; 2907; 3480; 4041; 4057; 4160; 135458; 51316; 4756; 4843; 5021; 5028; 5293; 5295; 5570; 5732; 6208; 6356; 6498; 6522; 79041; 8399; 9472; 10039; 10461; 10587; 10694; 116519; 2055; 56670; 51022; 51599; 84662; 54805; 55450; 23178; 23428; 124220; 91252; 159296; 28514; 64116; 64127; 169200	HUS1B; PARP3; SLC7A8; RPS14; GLIS2; CD34; NOS2; GLRX2; B2M; SLC4A2; APOA5; SKIL; FLT3; MC4R; ZG16B; TMEM38A; SLC39A13; CCT8; NKX2-3; PLAC8; PASK; CPT2; PIK3CD; PTGER2; NEO1; LSR; NR5A2; PIK3R1; NOD2; TXNRD2; SUCNR1; CLN8; IGF1R; CCL11; GRINA; ATP1B2; ATP1B1; SLC39A8; DLL1; TMEM64; LTF; MERTK; P2RY1; CXADR; AKAP6; CNNM2; PLA2G10; LRP5; SCARB1; PKIB; OXTR; CAMK2N1; BCL2	1870	1870
0.0206778	0.216004	GO:1903659	b	4	regulation of complement-dependent cytotoxicity	966; 3075	CD59; CFH	11	11
0.0139082	0.216444	GO:0090647	b	3	modulation of age-related behavioral decline	567; 6356	CCL11; B2M	9	9
0.0147899	0.216444	GO:0006935	b	3	chemotaxis	1525; 1803; 1942; 2043; 2260; 3800; 4756; 5293; 5295; 6091; 6356; 6367; 6711; 8399; 10509; 10678; 56670; 285220; 91584; 59277; 57643; 64127	EPHA6; EPHA4; SEMA4B; SPTBN1; B3GNT2; PIK3CD; ZSWIM5; NEO1; PIK3R1; NOD2; CCL22; DPP4; SUCNR1; CCL11; EFNA1; FGFR1; CXADR; PLA2G10; ROBO1; KIF5C; NTN4; PLXNA4	643	643
0.0149491	0.216444	GO:0050793	b	3	regulation of developmental process	482; 567; 596; 649; 947; 1491; 1493; 1601; 1942; 1990; 2043; 2260; 3299; 3706; 4041; 4057; 135228; 51316; 4825; 4860; 4882; 4958; 5021; 5028; 5293; 5295; 5465; 5617; 22854; 6091; 6356; 55679; 6498; 6660; 8399; 8717; 9150; 9350; 9398; 9472; 10039; 10363; 10401; 10509; 10675; 10769; 11117; 23236; 80326; 29993; 114804; 114990; 51460; 8820; 55795; 23286; 57194; 57633; 91584; 59277; 57643; 27257; 2730…	CSPG5; PCID2; HSF4; ACVR1C; PLCB1; HESX1; EPHA4; CD34; CTDP1; LIMS2; SFMBT1; B2M; BMP10; CER1; DAB2; SKIL; PLXNA4; CTH; SEMA4B; SOX5; CELA1; NTNG1; PLAC8; WWC1; TMEM135; PIK3CD; TRADD; ITPKA; ZSWIM5; EMILIN1; PIK3R1; NKX6-1; PACSIN1; HMG20A; CTLA4; NPR2; PLK2; VASN; ATP10A; ATP1B2; AKAP6; EFNA1; PARP3; DLL1; LTF; PPARA; LSM1; P2RY1; FKBPL; FGFR1; CCL11; CD101; TMEM64; PLA2G10; PRL; BMP1; LRP5; RO…	2592	2589
0.0154968	0.216444	GO:0044282	b	3	small molecule catabolic process	949; 1376; 1491; 2026; 2166; 2990; 3248; 4041; 4843; 4860; 5465; 5828; 10157; 78991; 445329; 27349; 26007	PCYOX1L; NOS2; PEX2; FAAH; MCAT; LRP5; AASS; PNP; SCARB1; CPT2; TKFC; ENO2; PPARA; CTH; HPGD; SULT1A4; GUSB	460	460
0.0163524	0.216444	GO:0040012	b	3	regulation of locomotion	482; 596; 949; 977; 999; 1601; 1803; 1942; 2260; 3480; 4825; 5217; 5293; 5295; 22854; 6091; 6356; 7130; 8717; 10509; 10769; 11117; 11314; 56670; 23236; 91584; 57643; 27302; 81029; 130399; 64127	ACVR1C; PLK2; CD151; BMP10; DAB2; SEMA4B; NTNG1; PIK3CD; TRADD; ZSWIM5; PIK3R1; NOD2; CDH1; FGFR1; DPP4; SUCNR1; PLCB1; IGF1R; ATP1B2; EFNA1; NKX6-1; CCL11; EMILIN1; ROBO1; SCARB1; TNFAIP6; PLXNA4; PFN2; WNT5B; CD300A; BCL2	1001	1001
0.0167592	0.216444	GO:0031341	b	3	regulation of cell killing	567; 966; 3075; 3140; 3821; 4843	KLRC1; NOS2; CFH; CD59; MR1; B2M	99	99
0.01695	0.216444	GO:1901564	b	3	organonitrogen compound metabolic process	28; 55655; 420; 481; 567; 596; 649; 722; 949; 966; 999; 1024; 1117; 1376; 1380; 1491; 1601; 1611; 1675; 1803; 1942; 1990; 2026; 2029; 2043; 2260; 2289; 2322; 2650; 2952; 2990; 3075; 3299; 3451; 3480; 3508; 3706; 3991; 4041; 4057; 135228; 4313; 168448; 4843; 4860; 4882; 4913; 4958; 5021; 5028; 5069; 5129; 5198; 5217; 5283; 5293; 5295; 5465; 5525; 5570; 5617; 5783; 5828; 5875; 5886; 5908; 6091; 620…	PGAP1; HSF4; IGHV1OR21-1; IGHV3-15; PLK2; PPP4R1; GLRX2; FKBP5; B2M; CHI3L2; ANKIB1; DAB2; B3GNT2; BOD1; PRL; WWC1; ARHGEF5; PIK3CD; ENSA; CDH1; IGHV3-7; IFNA17; HMG20A; PFAS; GUSB; NPR2; STAMBP; LIPE; CTSB; PAPPA; FXR1; IGHMBP2; FGFR1; BMP1; CSPG5; PTPN13; SCARB1; OMD; RHBDL2; IGHV3-53; PKIB; IGLV3-27; ROBO1; CSTL1; DND1; RNF103; RNF7; NTHL1; CD300A; PAPPA2; RASGRP3; ACVR1C; BBOX1; HESX1; DCLK2;…	7085	7076
0.0170516	0.216444	GO:0009994	b	3	oocyte differentiation	596; 4882; 402381; 284071	MEIOC; NPR2; SOHLH1; BCL2	48	48
0.0171007	0.216444	GO:0043299	b	3	leukocyte degranulation	567; 671; 932; 966; 1088; 1675; 2215; 2990; 3903; 4057; 51316; 4860; 5293; 5908; 7130; 10694; 11314; 1508; 51646	YPEL5; CCT8; TNFAIP6; BPI; PLAC8; CFD; CD59; PIK3CD; RAP1B; FCGR3B; CTSB; B2M; LAIR1; LTF; PNP; CEACAM8; CD300A; MS4A3; GUSB	541	539
0.0171499	0.216444	GO:0043084	b	3	penile erection	5021; 5028	P2RY1; OXTR	10	10
0.0183233	0.217534	GO:0006910	b	3	phagocytosis, recognition	949; 390530; 28420; 28434; 28448; 28452	IGHV1OR21-1; IGHV3-7; IGHV3-15; SCARB1; IGHV3-53; IGHV3-33	101	101
0.018425	0.217534	GO:0019222	b	3	regulation of metabolic process	131118; 55655; 481; 596; 722; 944; 947; 949; 966; 999; 1024; 1376; 1380; 1491; 1601; 1611; 1942; 1990; 2019; 2029; 2043; 2260; 2322; 2494; 2966; 3075; 3203; 3248; 3299; 3451; 3480; 4041; 4057; 135228; 4160; 197320; 51316; 4756; 4825; 4843; 5021; 5028; 5129; 5217; 5293; 5295; 5434; 5465; 5525; 5570; 5617; 5783; 5828; 5886; 5908; 169834; 6091; 6208; 6227; 6356; 6367; 6498; 6504; 6660; 6775; 7580; 7…	HSF5; HSF4; PLK2; CD34; PPP4R1; GLRX2; SFMBT1; MAFK; ZNF600; ANKIB1; DAB2; IGHV3-7; ZBTB38; BOD1; PRL; WWC1; ARHGEF5; PIK3CD; ENSA; ZNF577; CDH1; OR7D2; FGFR1; IFNA17; HMG20A; CLN8; IGF1R; ZNF542P; ATP1B1; FXR1; NKX6-1; ZNF670; ROBO1; SCARB1; ZNF883; PKIB; IGLV3-27; GALR3; PTPN13; CSTL1; DND1; ZNF778; CD300A; ZNF215; ACVR1C; GLIS2; HABP4; DMRTB1; MFSD12; NKX2-3; APOA5; MC4R; CCT8; PIAS3; MXD3; PA…	6911	6903
0.0213573	0.219722	GO:0007292	b	4	female gamete generation	596; 3248; 4882; 7130; 402381; 284071; 27030	MEIOC; NPR2; TNFAIP6; MLH3; SOHLH1; HPGD; BCL2	134	134
0.0220155	0.221187	GO:0002444	b	4	myeloid leukocyte mediated immunity	567; 671; 932; 966; 1088; 1675; 2215; 2990; 3903; 4057; 51316; 4860; 5293; 5908; 7130; 10694; 11314; 1508; 51646	YPEL5; CCT8; TNFAIP6; BPI; PLAC8; CFD; CD59; PIK3CD; RAP1B; FCGR3B; CTSB; B2M; LAIR1; LTF; PNP; CEACAM8; CD300A; MS4A3; GUSB	556	554
0.0221513	0.221187	GO:0023057	b	4	negative regulation of signaling	596; 1491; 1601; 1942; 2907; 2966; 3480; 4057; 135228; 5465; 5908; 6091; 6498; 6504; 7837; 8717; 9350; 9463; 10617; 10769; 11117; 11314; 11329; 80114; 114804; 114990; 84662; 55450; 23286; 27303; 26007; 28514; 130399; 51162; 5204; 64127; 64388; 169200; 27244	SESN1; ACVR1C; GLIS2; PLK2; RAP1B; RBMS3; CER1; DAB2; CTH; WWC1; TRADD; BICC1; NOD2; PFDN5; RNF157; GREM2; IGF1R; STAMBP; VASN; GTF2H2; GRINA; EFNA1; DLL1; LTF; PPARA; TMEM64; EMILIN1; ROBO1; CD109; PICK1; TKFC; EGFL7; SLAMF1; STK38; BCL2; CAMK2N1; CD300A; PXDN; SKIL	1355	1354
0.0202087	0.226998	GO:0006887	b	3	exocytosis	567; 671; 932; 966; 1088; 1675; 2215; 2990; 3903; 4057; 135228; 51316; 4860; 5028; 5293; 5908; 7130; 10675; 10694; 11314; 1508; 78991; 57553; 84062; 51646; 22927; 23086; 341359	BPI; CD59; RAP1B; FCGR3B; HABP4; B2M; LAIR1; MS4A3; YPEL5; CCT8; PLAC8; PIK3CD; SYT10; MICAL3; CEACAM8; GUSB; PCYOX1L; CTSB; LTF; DTNBP1; P2RY1; CSPG5; PNP; CFD; TNFAIP6; CD300A; CD109; EXPH5	901	898
0.0209142	0.226998	GO:0009887	b	3	animal organ morphogenesis	596; 649; 947; 1601; 1942; 1990; 2260; 2494; 2650; 3203; 4041; 4057; 4313; 4825; 5465; 22854; 6091; 6356; 55679; 6660; 9350; 80326; 4646; 112724; 8820; 59277; 27302; 60676; 159296; 28514; 64388	HESX1; CD34; LIMS2; CELA1; BMP10; CER1; DAB2; NKX2-3; SOX5; GCNT1; NTNG1; WNT10A; NR5A2; NKX6-1; GREM2; EFNA1; DLL1; LTF; PPARA; FGFR1; CCL11; BMP1; LRP5; ROBO1; PAPPA2; NTN4; MYO6; HOXA6; RDH13; MMP2; BCL2	1023	1021
0.0210873	0.226998	GO:0031647	b	3	regulation of protein stability	481; 482; 596; 1942; 2043; 5217; 5295; 5828; 5886; 10694; 29974; 63943	CCT8; PEX2; RAD23A; FKBPL; EPHA4; ATP1B2; EFNA1; ATP1B1; PFN2; PIK3R1; A1CF; BCL2	297	297
0.0240006	0.23618	GO:0046883	b	4	regulation of hormone secretion	291; 1803; 2029; 4041; 4825; 4843; 5028; 9463; 55450; 23178; 130399	NOS2; ACVR1C; LRP5; PASK; PICK1; SLC25A4; ENSA; CAMK2N1; P2RY1; DPP4; NKX6-1	268	268
0.0256109	0.245113	GO:0003180	b	4	aortic valve morphogenesis	1942; 6091; 11117	ROBO1; EMILIN1; EFNA1	31	31
0.0261315	0.245113	GO:0097061	b	4	dendritic spine organization	1942; 2043; 3480; 3706; 9463	ITPKA; IGF1R; EPHA4; PICK1; EFNA1	81	81
0.0263594	0.245113	GO:0048489	b	4	synaptic vesicle transport	3800; 5028; 5908; 10239; 10675; 84062; 341359	CSPG5; KIF5C; RAP1B; AP3S2; SYT10; DTNBP1; P2RY1	140	140
0.0265745	0.245113	GO:0044242	b	4	cellular lipid catabolic process	949; 1376; 2166; 3248; 3991; 5465; 5828; 8399; 116519; 27349	MCAT; PEX2; LIPE; SCARB1; CPT2; PLA2G10; PPARA; APOA5; FAAH; HPGD	239	238
0.0283354	0.245113	GO:0071825	b	4	protein-lipid complex subunit organization	649; 949; 8399; 116519	APOA5; SCARB1; PLA2G10; BMP1	56	56
0.0284677	0.245113	GO:0030073	b	4	insulin secretion	291; 1803; 2029; 4041; 4825; 4843; 9463; 55450; 130399	NOS2; ACVR1C; LRP5; PICK1; SLC25A4; ENSA; CAMK2N1; DPP4; NKX6-1	207	207
0.02854	0.245113	GO:0032490	b	4	detection of molecule of bacterial origin	949; 64127	SCARB1; NOD2	13	13
0.02854	0.245113	GO:0009437	b	4	carnitine metabolic process	1376; 8424	CPT2; BBOX1	13	13
0.02854	0.245113	GO:0002551	b	4	mast cell chemotaxis	5293; 6356	CCL11; PIK3CD	13	13
0.0287248	0.245113	GO:0022612	b	4	gland morphogenesis	596; 4041; 6356; 55679; 59277; 159296	CCL11; LRP5; NTN4; LIMS2; NKX2-3; BCL2	112	112
0.0288793	0.245113	GO:0000902	b	4	cell morphogenesis	596; 1942; 2043; 3706; 3800; 4756; 4825; 5028; 5293; 5295; 6091; 6356; 55679; 6498; 6711; 8399; 10461; 10509; 10675; 10678; 285220; 79834; 29993; 114804; 84062; 22854; 57194; 91584; 59277; 57643	EPHA6; EPHA4; LIMS2; SEMA4B; SPTBN1; NTNG1; B3GNT2; PIK3CD; ITPKA; ZSWIM5; NEO1; PIK3R1; PACSIN1; RNF157; PEAK1; ATP10A; EFNA1; SKIL; MERTK; DTNBP1; P2RY1; NKX6-1; CCL11; PLA2G10; CSPG5; ROBO1; KIF5C; NTN4; PLXNA4; BCL2	1008	1008
0.0236941	0.246101	GO:0050432	b	3	catecholamine secretion	5021; 5028; 84062; 341359	SYT10; P2RY1; DTNBP1; OXTR	54	53
0.0242067	0.246101	GO:0048513	b	3	animal organ development	131118; 482; 567; 596; 649; 944; 947; 999; 81871; 1380; 1493; 1525; 1601; 1824; 1942; 1990; 2019; 2043; 2260; 2322; 2494; 2650; 3140; 3203; 3248; 3299; 3451; 3821; 4041; 4057; 135228; 4313; 4703; 4825; 4852; 4860; 4882; 4958; 5021; 5293; 5295; 5465; 5617; 22854; 6091; 6208; 6356; 55679; 6498; 6660; 8087; 8717; 9150; 9350; 9398; 9472; 10401; 10461; 10509; 11117; 80055; 2055; 23236; 319101; 440051;…	PGAP1; HSF4; CD34; SFMBT1; B2M; DAB2; SEMA4B; KRTAP4-6; NTNG1; PRL; PIK3CD; MR1; CDH1; FGFR1; IFNA17; CLN8; KRTAP1-1; NPR2; CXADR; ATP1B2; FXR1; NKX6-1; AKAP6; BMP1; ROBO1; OMD; NPY; PAPPA2; GREM2; PLCB1; GLIS2; NKX2-3; HPGD; HOXA6; BICC1; EN1; LSR; NR5A2; PIK3R1; CTLA4; DNAJC30; PPARA; CR2; TMEM64; PCID2; WNT10A; WNT5B; ACP6; KRT73; DSC2; EPHA4; NEB; CTDP1; FLT3; KRTAP5-11; TRADD; HESX1; TNFSF8;…	3503	3496
0.0300589	0.248525	GO:0071560	b	4	cellular response to transforming growth factor beta stimulus	1601; 3248; 135228; 5465; 6498; 6660; 9372; 11117; 80326; 114990	VASN; EMILIN1; WNT10A; CD109; ZFYVE9; SKIL; PPARA; DAB2; HPGD; SOX5	243	243
0.0301661	0.248525	GO:0042339	b	4	keratan sulfate metabolic process	4958; 9435; 10678	CHST2; B3GNT2; OMD	33	33
0.0303793	0.248525	GO:0002460	b	4	adaptive immune response based on somatic recombination of immune receptors built from immunoglobulin superfamily domains	567; 722; 1380; 3140; 3821; 10039; 338322; 28420; 28434; 28448; 28452; 28791; 390530; 64127	CR2; KLRC1; IGHV1OR21-1; IGHV3-7; IGHV3-15; C4BPA; MR1; PARP3; B2M; IGHV3-33; NLRP10; NOD2; IGHV3-53; IGLV3-27	386	386
0.031709	0.254786	GO:0044273	b	4	sulfur compound catabolic process	1491; 4958; 10675; 78991	PCYOX1L; CSPG5; CTH; OMD	58	58
0.032057	0.254786	GO:0022008	b	4	neurogenesis	482; 567; 596; 999; 1942; 2019; 2043; 2260; 3706; 3800; 4756; 4825; 4852; 5028; 5293; 5295; 6091; 6356; 6498; 6660; 6711; 8399; 9463; 10363; 10509; 10675; 10678; 10769; 2055; 285220; 80326; 4646; 29993; 114804; 112724; 84062; 22854; 91584; 59277; 59335; 57643; 27257; 81029; 28514	EPHA6; EPHA4; MYO6; B2M; SEMA4B; PLXNA4; SPTBN1; SOX5; NTNG1; B3GNT2; ZSWIM5; WNT10A; PIK3CD; ITPKA; EN1; NEO1; PIK3R1; CDH1; FGFR1; PACSIN1; HMG20A; CLN8; PLK2; ATP1B2; LSM1; EFNA1; DLL1; SKIL; DTNBP1; PRDM12; P2RY1; NKX6-1; CCL11; PLA2G10; CSPG5; ROBO1; KIF5C; NTN4; PICK1; RNF157; NPY; RDH13; WNT5B; BCL2	1603	1603
0.0324585	0.254786	GO:0048705	b	4	skeletal system morphogenesis	649; 2260; 3203; 4041; 4057; 4313; 6660; 9350; 60676	BMP1; LRP5; PAPPA2; HOXA6; LTF; CER1; SOX5; MMP2; FGFR1	213	212
0.0328492	0.254786	GO:0097531	b	4	mast cell migration	5293; 6356	CCL11; PIK3CD	14	14
0.0330209	0.254786	GO:0022603	b	4	regulation of anatomical structure morphogenesis	596; 947; 1601; 1942; 1990; 2043; 3706; 4825; 5028; 5293; 5617; 6091; 6356; 55679; 6498; 10509; 10675; 10769; 11117; 80326; 114804; 22854; 57194; 91584; 59277; 57643; 27302; 81029; 28514; 63943; 65084	TMEM135; PLK2; CD34; LIMS2; BMP10; DAB2; SEMA4B; NTNG1; WNT10A; PIK3CD; ITPKA; ZSWIM5; CELA1; RNF157; EPHA4; ATP10A; EFNA1; DLL1; SKIL; P2RY1; NKX6-1; CCL11; EMILIN1; CSPG5; ROBO1; NTN4; PLXNA4; FKBPL; PRL; WNT5B; BCL2	1061	1061
0.0341475	0.257615	GO:0046620	b	4	regulation of organ growth	5465; 9150; 9472; 23286; 27302	AKAP6; CTDP1; BMP10; WWC1; PPARA	87	87
0.0344402	0.257615	GO:0048523	b	4	negative regulation of cellular process	291; 482; 567; 596; 671; 722; 947; 966; 999; 1491; 1493; 1601; 1611; 1803; 1942; 1990; 2019; 2029; 2043; 2622; 2907; 2966; 3248; 3299; 3480; 4041; 4057; 135228; 197320; 135458; 51316; 168448; 4825; 4882; 5028; 5217; 5295; 5465; 5525; 5570; 5617; 5783; 5828; 5908; 6091; 6208; 6356; 55679; 6498; 6504; 79041; 6711; 7678; 7692; 7837; 7975; 8087; 91272; 8717; 9150; 9350; 9463; 9472; 253461; 10039; 100…	HSF4; PLK2; CD34; SFMBT1; B2M; MAFK; DAB2; SEMA4B; EN1; BOD1; PRL; WWC1; ENSA; CDH1; HMG20A; CLN8; NPR2; STAMBP; GRINA; ATP1B2; SLC25A4; FXR1; NKX6-1; AKAP6; ROBO1; PACSIN1; PKIB; EGFL7; PTPN13; CSTL1; DND1; ZNF778; CD300A; PXDN; HUS1B; ACVR1C; PLCB1; GLIS2; MFSD12; C4BPA; PASK; BICC1; ZBTB38; PIK3R1; CTLA4; ZNF224; NUPR2; PARP3; PPARA; PEX2; PRDM12; PCID2; CDC14C; TKFC; GAS8; PFN2; STK38; PPP2R5…	4836	4830
0.034732	0.257615	GO:0048666	b	4	neuron development	482; 567; 596; 999; 1942; 2019; 2043; 3706; 3800; 4756; 4825; 4852; 5293; 5295; 6091; 6498; 6711; 8399; 9463; 10509; 10678; 10769; 285220; 29993; 114804; 112724; 84062; 22854; 91584; 59277; 59335; 57643	EPHA6; PLK2; B2M; SEMA4B; SPTBN1; NTNG1; B3GNT2; ZSWIM5; PIK3CD; ITPKA; EN1; NEO1; PIK3R1; CDH1; PACSIN1; RNF157; EPHA4; ATP1B2; EFNA1; SKIL; DTNBP1; PRDM12; NKX6-1; PLA2G10; ROBO1; KIF5C; NTN4; PICK1; PLXNA4; NPY; RDH13; BCL2	1107	1107
0.0352721	0.257615	GO:0097530	b	4	granulocyte migration	1525; 1803; 5293; 6356; 6367; 11314; 64127	CXADR; CCL22; CCL11; PIK3CD; NOD2; CD300A; DPP4	149	149
0.0352845	0.257615	GO:0016054	b	4	organic acid catabolic process	1376; 1491; 2166; 2990; 3248; 4843; 5465; 5828; 10157; 78991; 27349	PCYOX1L; NOS2; PEX2; FAAH; MCAT; AASS; CPT2; PPARA; CTH; HPGD; GUSB	285	285
0.0361164	0.260884	GO:0009893	b	4	positive regulation of metabolic process	55655; 596; 722; 944; 947; 949; 999; 1024; 1376; 1601; 1611; 1942; 1990; 2019; 2043; 2260; 2322; 2494; 3299; 3451; 3480; 4041; 4057; 51316; 4825; 4843; 5021; 5028; 5217; 5293; 5295; 5434; 5465; 5525; 5570; 5617; 5886; 5908; 6091; 6356; 6367; 6504; 6775; 7984; 8087; 8399; 8484; 8717; 9463; 253461; 10039; 10040; 10401; 10461; 10694; 10769; 116519; 11117; 11314; 23236; 285220; 373863; 7767; 80326; 4…	HSF4; PLK2; CD34; ANKIB1; DAB2; ZBTB38; WNT10A; WWC1; ARHGEF5; PIK3CD; CDH1; FGFR1; IFNA17; IGF1R; PASK; FXR1; NKX6-1; ROBO1; SCARB1; PKIB; GALR3; DND1; CD300A; ACVR1C; GLIS2; HABP4; NKX2-3; APOA5; CCT8; C4BPA; EN1; NFE4; NR5A2; PIK3R1; CCL22; PLCB1; ZNF224; PARP3; POLR2E; DCUN1D5; PPARA; ZNF658B; PRDM12; PCID2; PFN2; TOX2; PRL; PPP2R5A; ZNF827; MEIOC; CPT2; SESN1; RAD23A; EPHA6; EPHA4; RAP1B; FL…	3654	3650
0.0368339	0.261066	GO:0040013	b	4	negative regulation of locomotion	482; 596; 999; 1803; 5217; 6091; 10509; 11117; 11314; 23236; 27302; 130399	PLCB1; ACVR1C; EMILIN1; ROBO1; ATP1B2; PFN2; BMP10; CDH1; SEMA4B; CD300A; DPP4; BCL2	323	323
0.0369107	0.261066	GO:0042110	b	4	T cell activation	567; 596; 944; 977; 1493; 1525; 1803; 3140; 3451; 3821; 4860; 5293; 5295; 11314; 159296; 64127	KLRC1; CTLA4; CXADR; IFNA17; NOD2; PIK3CD; MR1; CD151; B2M; TNFSF8; PIK3R1; PNP; NKX2-3; CD300A; DPP4; BCL2	472	472
0.0373945	0.261498	GO:0034380	b	4	high-density lipoprotein particle assembly	649; 116519	APOA5; BMP1	15	15
0.037742	0.261498	GO:0034367	b	4	protein-containing complex remodeling	949; 8399; 116519	APOA5; SCARB1; PLA2G10	36	36
0.0292931	0.268562	GO:0019637	b	3	organophosphate metabolic process	131118; 481; 949; 2026; 2322; 3706; 4843; 4860; 4882; 4913; 5028; 5198; 5283; 5293; 5295; 5465; 5783; 8399; 8460; 8821; 7084; 10157; 10654; 116519; 80055; 2055; 23236; 51205; 84277; 445329; 349565; 25961; 387712; 26007; 64127	PGAP1; ACP6; NPR2; APOA5; FLT3; AASS; PIK3CD; INPP4B; ITPKA; PIK3R1; NOD2; NMNAT3; PFAS; DNAJC19; PLCB1; NOS2; TPST1; PIGH; SULT1A4; DNAJC30; ATP1B1; NUDT13; ENO2; TK2; PPARA; P2RY1; PLA2G10; PTPN13; PNP; SCARB1; PMVK; TKFC; ENO4; NTHL1; CLN8	1218	1215
0.0299941	0.268562	GO:0086065	b	3	cell communication involved in cardiac conduction	481; 482; 1525; 1824	DSC2; CXADR; ATP1B2; ATP1B1	57	57
0.0310953	0.268562	GO:2000241	b	3	regulation of reproductive process	4882; 5021; 5028; 8399; 23236; 284071; 130399	MEIOC; PLCB1; NPR2; PLA2G10; ACVR1C; OXTR; P2RY1	145	145
0.0311338	0.268562	GO:0009888	b	3	tissue development	596; 649; 947; 977; 81871; 1525; 1601; 1824; 1942; 2019; 2043; 2260; 2494; 2650; 4041; 4057; 135228; 4313; 4703; 4825; 4852; 4958; 5293; 5465; 5908; 22854; 6091; 6356; 6498; 6660; 8717; 9150; 9350; 9472; 10509; 116519; 1508; 23236; 319101; 440051; 80326; 4646; 81851; 114990; 8820; 23086; 91252; 59277; 27302; 81029; 159296; 28514; 63943	KRT73; KRTAP1-1; HESX1; PIK3CD; EPHA4; CD34; RAP1B; CTDP1; CD151; BMP10; CER1; DAB2; SKIL; SEMA4B; SOX5; SLC39A13; GCNT1; NTNG1; EXPH5; WNT10A; DSC2; TRADD; KRTAP4-6; EN1; NR5A2; FGFR1; PLCB1; VASN; CCL11; NEB; CTSB; EFNA1; DLL1; LTF; PPARA; NKX2-3; NKX6-1; KRTAP5-11; CXADR; AKAP6; BMP1; LRP5; ROBO1; CD109; OMD; NTN4; MYO6; FKBPL; NPY; APOA5; WNT5B; MMP2; BCL2	1989	1986
0.0325929	0.268562	GO:0034369	b	3	plasma lipoprotein particle remodeling	949; 8399; 116519	APOA5; SCARB1; PLA2G10	34	34
0.0328492	0.268562	GO:0001780	b	3	neutrophil homeostasis	5293; 10461	PIK3CD; MERTK	14	14
0.0332937	0.268562	GO:0032989	b	3	cellular component morphogenesis	596; 1942; 2043; 3706; 3800; 4703; 4756; 4825; 5028; 5293; 5295; 22854; 6091; 6356; 55679; 6498; 6711; 8399; 10461; 10509; 10675; 10678; 285220; 79834; 29993; 114804; 84062; 57194; 91584; 59277; 57643; 27302	EPHA6; EPHA4; NEB; LIMS2; BMP10; SEMA4B; SPTBN1; NTNG1; B3GNT2; PIK3CD; ITPKA; ZSWIM5; NEO1; PIK3R1; PACSIN1; RNF157; PEAK1; ATP10A; EFNA1; SKIL; MERTK; DTNBP1; P2RY1; NKX6-1; CCL11; PLA2G10; CSPG5; ROBO1; KIF5C; NTN4; PLXNA4; BCL2	1103	1103
0.0338273	0.268562	GO:0010817	b	3	regulation of hormone levels	291; 949; 1589; 1803; 2029; 3991; 4041; 4825; 4843; 5028; 9463; 114571; 112724; 55450; 23178; 23428; 222962; 130399	NOS2; LIPE; ACVR1C; SLC7A8; LRP5; CYP21A2; SCARB1; PICK1; PASK; SLC25A4; SLC29A4; ENSA; RDH13; CAMK2N1; P2RY1; DPP4; SLC22A9; NKX6-1	543	543
0.0346527	0.268562	GO:0071559	b	3	response to transforming growth factor beta	1601; 3248; 135228; 5465; 6498; 6660; 9372; 11117; 80326; 114990	VASN; EMILIN1; WNT10A; CD109; ZFYVE9; SKIL; PPARA; DAB2; HPGD; SOX5	249	249
0.0348752	0.268562	GO:1901135	b	3	carbohydrate derivative metabolic process	28; 481; 596; 1117; 1990; 2026; 2650; 2990; 4860; 4882; 4913; 4958; 5198; 5283; 5465; 7844; 8460; 9435; 7084; 10157; 10654; 10675; 10678; 80055; 23236; 83857; 51205; 84277; 84620; 445329; 145553; 55768; 9951; 387712; 26007; 64116	PGAP1; ACP6; HS3ST4; ST6GAL2; CHI3L2; ABO; NGLY1; GCNT1; B3GNT2; AASS; PFAS; GUSB; PLCB1; NPR2; TMTC1; TPST1; PIGH; SULT1A4; DNAJC30; ATP1B1; SLC39A8; ENO2; TK2; PPARA; CHST2; MDP1; CELA1; OMD; PNP; CSPG5; PMVK; TKFC; RNF103; ENO4; NTHL1; BCL2	1277	1274
0.0353085	0.268562	GO:0032623	b	3	interleukin-2 production	947; 4860; 6711; 64127	PNP; CD34; SPTBN1; NOD2	60	60
0.0359426	0.268562	GO:1901615	b	3	organic hydroxy compound metabolic process	596; 949; 1571; 1589; 2494; 3706; 3991; 4041; 5028; 8821; 10654; 116519; 2055; 23236; 112724; 445329; 26007; 126321	PLCB1; CLN8; LIPE; LRP5; CYP21A2; SCARB1; PMVK; INPP4B; CYP2E1; ITPKA; MFSD12; TKFC; NR5A2; RDH13; APOA5; P2RY1; SULT1A4; BCL2	547	547
0.0363715	0.268562	GO:0001935	b	3	endothelial cell proliferation	947; 949; 2260; 5293; 5617; 6356; 51162	CCL11; CD34; SCARB1; PIK3CD; EGFL7; PRL; FGFR1	150	150
0.0373945	0.268562	GO:0007567	b	3	parturition	3248; 5021	HPGD; OXTR	15	15
0.0374933	0.268562	GO:0071695	b	3	anatomical structure maturation	596; 4057; 4313; 4825; 4882; 9463; 59277	NPR2; NTN4; PICK1; LTF; BCL2; MMP2; NKX6-1	152	151
0.0385645	0.268562	GO:0009306	b	3	protein secretion	291; 947; 1803; 2029; 4041; 4825; 4843; 9463; 56670; 285381; 55450; 23086; 130399	NOS2; DPH3; ACVR1C; EXPH5; LRP5; CD34; PICK1; SLC25A4; ENSA; CAMK2N1; DPP4; SUCNR1; NKX6-1	362	362
0.0391349	0.268562	GO:0043954	b	3	cellular component maintenance	3480; 3706; 3801; 9463	ITPKA; IGF1R; KIFC3; PICK1	62	62
0.0396239	0.268562	GO:0097529	b	3	myeloid leukocyte migration	1525; 1803; 5293; 6356; 6367; 11117; 11314; 23236; 64127	CXADR; CD300A; EMILIN1; CCL11; PLCB1; PIK3CD; NOD2; CCL22; DPP4	220	220
0.0407204	0.270739	GO:0043170	b	3	macromolecule metabolic process	28; 55655; 420; 481; 567; 596; 649; 722; 944; 947; 966; 999; 1024; 1117; 1380; 1491; 1601; 1611; 1675; 1803; 1942; 1990; 2019; 2029; 2043; 2260; 2289; 2322; 2494; 2650; 2966; 2990; 3075; 3203; 3299; 3451; 3480; 3508; 3706; 3991; 4041; 4057; 135228; 197320; 4313; 135458; 51316; 168448; 4756; 4825; 4843; 4882; 4913; 4958; 5021; 5028; 5069; 5129; 5217; 5283; 5293; 5295; 5434; 5465; 5525; 5570; 5617;…	PGAP1; HSF5; HSF4; IGHV1OR21-1; IGHV3-15; CLN8; PLK2; CD34; PPP4R1; GLRX2; FKBP5; B2M; MAFK; CHI3L2; ZNF600; ANKIB1; DAB2; B3GNT2; ZBTB38; BOD1; PRL; WWC1; ARHGEF5; PIK3CD; SFMBT1; ENSA; ZNF577; CDH1; OR7D2; FGFR1; IFNA17; HMG20A; GUSB; RNASE1; NPR2; STAMBP; LIPE; CTSB; PAPPA; FXR1; IGHMBP2; NKX6-1; SNRPD2; BMP1; CSPG5; ROBO1; LRP5; RHBDL2; IGHV3-53; PKIB; IGLV3-27; GALR3; PTPN13; CSTL1; DND1; ZN…	9610	9599
0.0421333	0.270739	GO:0071495	b	3	cellular response to endogenous stimulus	999; 1129; 1601; 2043; 2260; 2322; 2494; 3248; 3480; 135228; 4313; 4756; 4825; 5028; 5295; 5434; 5465; 5617; 5732; 5908; 6498; 79041; 6660; 9350; 9372; 9472; 11117; 143282; 1508; 23236; 80326; 114990; 445329; 27302; 64127; 64388; 27244	SESN1; EPHA4; RAP1B; ZFYVE9; BMP10; CER1; DAB2; HPGD; SOX5; TMEM38A; PRL; PTGER2; FLT3; NEO1; FGFBP3; NR5A2; PIK3R1; NOD2; CDH1; FGFR1; GREM2; PLCB1; IGF1R; VASN; SULT1A4; CTSB; CHRM2; POLR2E; SKIL; PPARA; P2RY1; NKX6-1; AKAP6; EMILIN1; CD109; WNT10A; MMP2	1336	1336
0.0421643	0.270739	GO:0030728	b	3	ovulation	3248; 7130	TNFAIP6; HPGD	16	16
0.0432802	0.273113	GO:0032094	b	3	response to food	4852; 5465; 65084	TMEM135; NPY; PPARA	38	38
0.0448693	0.276754	GO:0023061	b	3	signal release	291; 1803; 2029; 4041; 4825; 4843; 5028; 5908; 9463; 10675; 84062; 55450; 23178; 341359; 130399	NOS2; ACVR1C; LRP5; PASK; CSPG5; RAP1B; SLC25A4; SYT10; ENSA; DTNBP1; PICK1; CAMK2N1; P2RY1; DPP4; NKX6-1	446	446
0.0453695	0.276754	GO:0006066	b	3	alcohol metabolic process	949; 3706; 3991; 4041; 5028; 8821; 10654; 116519; 2055; 23236; 112724; 445329; 26007	PLCB1; LIPE; LRP5; SULT1A4; SCARB1; PMVK; INPP4B; TKFC; ITPKA; RDH13; APOA5; P2RY1; CLN8	371	371
0.0408019	0.278187	GO:0051171	b	4	regulation of nitrogen compound metabolic process	55655; 596; 722; 944; 947; 949; 966; 999; 1024; 1380; 1491; 1601; 1611; 1942; 1990; 2019; 2029; 2043; 2260; 2322; 2494; 2966; 3075; 3203; 3299; 3451; 3480; 4041; 4057; 135228; 197320; 51316; 4756; 4825; 4843; 5028; 5129; 5217; 5295; 5465; 5525; 5570; 5617; 5783; 5828; 5886; 5908; 169834; 6091; 6208; 6356; 6367; 6498; 6504; 6660; 6775; 7580; 7678; 7692; 7762; 7975; 7984; 8087; 91272; 8399; 8484; 8…	HSF5; HSF4; PLK2; CD34; PPP4R1; GLRX2; SFMBT1; MAFK; ANKIB1; DAB2; IGHV3-7; ZBTB38; BOD1; PRL; WWC1; ARHGEF5; ENSA; ZNF577; CDH1; OR7D2; FGFR1; IFNA17; HMG20A; CLN8; IGF1R; ZNF542P; PASK; FXR1; NKX6-1; ZNF670; ROBO1; SCARB1; ZNF883; PKIB; IGLV3-27; GALR3; PTPN13; CSTL1; DND1; ZNF778; CD300A; ZNF215; ACVR1C; GLIS2; HABP4; DMRTB1; NKX2-3; CCT8; PIAS3; MXD3; SOHLH1; EN1; NFE4; NR5A2; PIK3R1; CCL22; …	6033	6025
0.0420929	0.278187	GO:0080090	b	4	regulation of primary metabolic process	131118; 55655; 596; 722; 944; 949; 966; 999; 1024; 1376; 1380; 1491; 1601; 1611; 1942; 1990; 2019; 2029; 2043; 2260; 2322; 2494; 2966; 3075; 3203; 3248; 3299; 3451; 3480; 4041; 4057; 135228; 197320; 51316; 4756; 4825; 4843; 5028; 5129; 5217; 5295; 5465; 5525; 5570; 5617; 5783; 5828; 5886; 5908; 169834; 6091; 6208; 6356; 6367; 6498; 6504; 6660; 6775; 7580; 7678; 7692; 7762; 7975; 7984; 8087; 91272…	HSF5; HSF4; PLK2; PPP4R1; GLRX2; SFMBT1; MAFK; ANKIB1; DAB2; IGHV3-7; EN1; BOD1; PRL; WWC1; ARHGEF5; ENSA; ZNF577; CDH1; OR7D2; FGFR1; IFNA17; HMG20A; CLN8; IGF1R; ZNF542P; PASK; FXR1; NKX6-1; ZNF670; ROBO1; SCARB1; ZNF883; PKIB; IGLV3-27; GALR3; PTPN13; CSTL1; DND1; ZNF778; CD300A; ZNF215; ACVR1C; GLIS2; HABP4; DMRTB1; NKX2-3; APOA5; CCT8; PIAS3; MXD3; SOHLH1; HPGD; ZBTB38; NFE4; LSR; NR5A2; PIK…	6227	6219
0.0421643	0.278187	GO:0010885	b	4	regulation of cholesterol storage	949; 5465	SCARB1; PPARA	16	16
0.0421643	0.278187	GO:0048243	b	4	norepinephrine secretion	5021; 5028	P2RY1; OXTR	16	16
0.0421992	0.278187	GO:0032101	b	4	regulation of response to external stimulus	722; 947; 966; 1380; 1803; 2043; 2260; 3075; 4057; 135228; 4843; 4852; 5465; 6091; 7130; 8717; 10509; 338322; 56670; 91584; 57643; 26007; 28420; 28434; 28452; 28791; 64127	EPHA4; CD34; IGHV3-53; IGHV3-33; NLRP10; SEMA4B; IGLV3-27; IGHV3-7; C4BPA; TRADD; ZSWIM5; NOD2; DPP4; SUCNR1; NOS2; CD59; LTF; PPARA; FGFR1; CR2; CFH; ROBO1; CD109; TNFAIP6; TKFC; PLXNA4; NPY	920	919
0.00299218	0.278597	GO:0055013	b	5	cardiac muscle cell development	1525; 4703; 5465; 9150; 9472; 27302	CXADR; AKAP6; NEB; CTDP1; BMP10; PPARA	69	69
0.00306926	0.278597	GO:0002920	b	5	regulation of humoral immune response	722; 966; 1380; 3075; 28420; 28434; 28452; 28791; 64127	CR2; IGHV3-7; CFH; C4BPA; CD59; IGLV3-27; IGHV3-53; IGHV3-33; NOD2	144	144
0.00320626	0.278597	GO:0001894	b	5	tissue homeostasis	482; 567; 596; 947; 1525; 4057; 4160; 2055; 124220; 64116; 64127; 169200	CXADR; TMEM64; ATP1B2; CD34; SLC39A8; B2M; LTF; NOD2; ZG16B; CLN8; MC4R; BCL2	231	231
0.00365434	0.278597	GO:0030449	b	5	regulation of complement activation	722; 966; 1380; 3075; 28420; 28434; 28452; 28791	CR2; IGHV3-7; CFH; C4BPA; CD59; IGLV3-27; IGHV3-53; IGHV3-33	121	121
0.00408078	0.278597	GO:0097576	b	5	vacuole fusion	2026; 387712	ENO2; ENO4	5	5
0.00408078	0.278597	GO:1901382	b	5	regulation of chorionic trophoblast cell proliferation	3641; 130399	INSL4; ACVR1C	5	5
0.00408078	0.278597	GO:0060406	b	5	positive regulation of penile erection	5021; 5028	P2RY1; OXTR	5	5
0.00477413	0.278597	GO:0051046	b	5	regulation of secretion	291; 947; 1803; 2029; 4041; 4825; 4843; 5021; 5028; 5617; 5908; 8399; 9463; 10675; 11314; 4646; 341359; 285381; 84062; 55450; 23086; 23178; 130399	ACVR1C; CD34; RAP1B; PICK1; P2RY1; PRL; SYT10; ENSA; DPP4; NOS2; PASK; EXPH5; DTNBP1; SLC25A4; NKX6-1; DPH3; PLA2G10; LRP5; CSPG5; MYO6; OXTR; CAMK2N1; CD300A	617	616
0.0049566	0.278597	GO:0055007	b	5	cardiac muscle cell differentiation	1525; 4703; 5465; 9150; 9472; 27302; 28514	CXADR; AKAP6; NEB; CTDP1; DLL1; BMP10; PPARA	101	101
0.00566145	0.278597	GO:0061050	b	5	regulation of cell growth involved in cardiac muscle cell development	5465; 9150; 9472	AKAP6; CTDP1; PPARA	18	18
0.00584469	0.278597	GO:0015844	b	5	monoamine transport	5021; 5028; 9463; 341359; 84062; 222962	OXTR; PICK1; SYT10; SLC29A4; DTNBP1; P2RY1	80	79
0.0471474	0.282885	GO:0023019	b	3	signal transduction involved in regulation of gene expression	5028; 9350	P2RY1; CER1	17	17
0.0438312	0.284164	GO:0071621	b	4	granulocyte chemotaxis	1525; 1803; 5293; 6356; 6367; 64127	CXADR; CCL11; PIK3CD; NOD2; CCL22; DPP4	124	124
0.0444518	0.284164	GO:0051128	b	4	regulation of cellular component organization	482; 567; 596; 722; 949; 977; 1601; 1803; 1942; 2026; 2043; 2966; 3480; 3706; 4041; 168448; 4703; 4825; 5021; 5028; 5217; 5295; 5465; 5570; 5908; 6091; 6356; 55679; 6498; 6711; 7984; 8087; 9150; 9463; 9472; 10039; 10040; 10157; 10461; 10509; 10675; 10694; 10769; 116519; 11117; 11314; 23236; 79834; 29993; 114804; 84259; 22854; 55795; 57194; 57633; 91584; 59335; 57643; 387712; 27302; 60676; 28514; …	PCID2; TMEM135; EPHA4; NEB; RAP1B; CTDP1; LIMS2; CD151; B2M; BMP10; LRRN1; APOA5; DAB2; SEMA4B; SPTBN1; CCT8; NTNG1; AASS; C4BPA; ARHGEF5; ITPKA; ZSWIM5; DCUN1D5; PIK3R1; ATP10A; DPP4; RNF157; PLCB1; IGF1R; PLK2; PFDN5; PEAK1; GTF2H2; NOD2; ATP1B2; EFNA1; PARP3; FXR1; ENO2; ENO4; SKIL; MERTK; PPARA; P2RY1; NKX6-1; CCL11; AKAP6; PRDM12; EMILIN1; LRP5; ROBO1; PACSIN1; SCARB1; CSPG5; CDC14C; PICK1; …	2562	2561
0.0447019	0.284164	GO:0009267	b	4	cellular response to starvation	596; 1611; 1824; 5465; 9463; 389493; 27244	SESN1; NUPR2; DSC2; PICK1; DAP; PPARA; BCL2	157	157
0.0451985	0.284164	GO:0048017	b	4	inositol lipid-mediated signaling	2260; 2322; 3480; 5293; 5295; 5783; 10617; 23236	PLCB1; IGF1R; PTPN13; STAMBP; PIK3CD; PIK3R1; FLT3; FGFR1	191	191
0.0460803	0.284164	GO:0060255	b	4	regulation of macromolecule metabolic process	55655; 481; 596; 722; 944; 947; 966; 999; 1024; 1380; 1491; 1601; 1611; 1942; 1990; 2019; 2029; 2043; 2260; 2322; 2494; 2966; 3075; 3203; 3299; 3451; 3480; 4041; 4057; 135228; 197320; 51316; 4756; 4825; 4843; 5028; 5129; 5217; 5293; 5295; 5434; 5465; 5525; 5570; 5617; 5783; 5828; 5886; 5908; 169834; 6091; 6208; 6227; 6356; 6367; 6498; 6504; 6660; 6775; 7580; 7678; 7692; 7762; 7975; 7984; 8087; 91…	HSF5; HSF4; PLK2; CD34; PPP4R1; GLRX2; SFMBT1; MAFK; ZNF600; ANKIB1; DAB2; IGHV3-7; ZBTB38; BOD1; PRL; WWC1; ARHGEF5; PIK3CD; ENSA; ZNF577; CDH1; OR7D2; FGFR1; IFNA17; HMG20A; CLN8; IGF1R; ZNF542P; ATP1B1; FXR1; NKX6-1; ZNF670; ROBO1; ZNF883; PKIB; IGLV3-27; GALR3; PTPN13; CSTL1; DND1; ZNF778; CD300A; ZNF215; ACVR1C; GLIS2; HABP4; DMRTB1; NKX2-3; CCT8; PIAS3; MXD3; PASK; SOHLH1; EN1; NFE4; NR5A2;…	6339	6332
0.0467525	0.284164	GO:1901861	b	4	regulation of muscle tissue development	596; 5465; 9150; 9472; 27302; 28514	AKAP6; CTDP1; DLL1; BMP10; PPARA; BCL2	126	126
0.0471474	0.284164	GO:1900424	b	4	regulation of defense response to bacterium	338322; 64127	NLRP10; NOD2	17	17
0.0472896	0.284164	GO:0055001	b	4	muscle cell development	596; 1525; 4703; 5465; 9150; 9472; 27302	CXADR; AKAP6; NEB; CTDP1; BMP10; PPARA; BCL2	159	159
0.0477921	0.284164	GO:0007399	b	4	nervous system development	482; 567; 596; 999; 1129; 1942; 2019; 2043; 2260; 3706; 3800; 4756; 4825; 4852; 5021; 5028; 5293; 5295; 6091; 6356; 6498; 6660; 6711; 7844; 7975; 8399; 9350; 9463; 10363; 10461; 10509; 10643; 10675; 10678; 10769; 2055; 23236; 285220; 80326; 4646; 29993; 114804; 112724; 84062; 84277; 84662; 84878; 8820; 80055; 22854; 23138; 57633; 91584; 59277; 59335; 57643; 27257; 81029; 28514; 130399	PGAP1; ACVR1C; GLIS2; EPHA6; EPHA4; MYO6; B2M; MAFK; CER1; SEMA4B; PLXNA4; SPTBN1; SOX5; NTNG1; B3GNT2; ZSWIM5; WNT10A; HESX1; PIK3CD; ITPKA; EN1; NEO1; PIK3R1; CDH1; FGFR1; PACSIN1; HMG20A; N4BP3; CLN8; PLCB1; PLK2; DNAJC30; RDH13; ATP1B2; CHRM2; EFNA1; LSM1; DLL1; SKIL; MERTK; DTNBP1; PRDM12; IGF2BP3; P2RY1; NKX6-1; CCL11; PLA2G10; CSPG5; ROBO1; KIF5C; NTN4; PICK1; LRRN1; RNF157; NPY; ZBTB45; R…	2351	2350
0.0480869	0.284164	GO:1901362	b	4	organic cyclic compound biosynthetic process	55655; 944; 949; 999; 1024; 1491; 1589; 1601; 1611; 1942; 1990; 2019; 2026; 2494; 2966; 3203; 3299; 4041; 4057; 197320; 51316; 4756; 4825; 4843; 4860; 4882; 4913; 5028; 5129; 5198; 5295; 5434; 5465; 5570; 5617; 5828; 169834; 6208; 6498; 6660; 6775; 7084; 7580; 7678; 7692; 7762; 7975; 7984; 8399; 8484; 8717; 9150; 402381; 83463; 9330; 9350; 253461; 10039; 10040; 10157; 10363; 10401; 10654; 10694; …	HSF5; HSF4; GLRX2; SFMBT1; MAFK; DAB2; ZBTB38; PRL; WWC1; ARHGEF5; ZNF577; CDH1; OR7D2; HMG20A; PFAS; NPR2; ZNF542P; NKX6-1; ZNF670; SCARB1; ZNF883; PKIB; GALR3; ZNF778; NTHL1; ZNF215; HESX1; GTF3C3; DMRTB1; MFSD12; NKX2-3; APOA5; CCT8; HOXA6; MXD3; SOHLH1; EN1; NFE4; NR5A2; PIK3R1; CYP21A2; PLCB1; ZNF224; NUPR2; DNAJC30; PARP3; POLR2E; TK2; ZNF827; PPARA; ZNF658B; SLC39A8; PEX2; PLA2G10; PCID2; …	4529	4524
0.0488463	0.284164	GO:0036211	b	4	protein modification process	28; 420; 596; 1024; 1491; 1601; 1942; 2029; 2043; 2260; 2289; 2322; 2650; 3299; 3451; 3480; 3706; 3991; 4041; 4057; 135228; 168448; 4843; 4882; 5021; 5028; 5129; 5217; 5283; 5293; 5295; 5525; 5570; 5783; 5828; 5875; 5886; 5908; 6091; 6356; 6367; 6504; 6711; 7681; 7844; 7984; 8087; 91272; 8460; 9150; 9463; 9989; 10039; 10040; 10157; 10363; 10401; 10461; 10617; 10678; 10769; 116519; 11117; 11314; 1…	PGAP1; HSF4; PLK2; PPP4R1; GLRX2; FKBP5; ANKIB1; DAB2; B3GNT2; BOD1; WWC1; ARHGEF5; PIK3CD; ENSA; IFNA17; HMG20A; NPR2; EPHA4; LIPE; PASK; FXR1; FGFR1; PTPN13; PKIB; ROBO1; RNF103; RNF7; CD300A; RASGRP3; ACVR1C; HESX1; DCLK2; APOA5; NGLY1; TPST1; ITPKA; PIK3R1; CCL22; PLCB1; PARP3; SLC39A8; STAMBPL1; DCUN1D5; DTNBP1; PEX2; PRDM12; CDC14C; KLHL42; PFN2; STK38; PPP2R5A; RAD23A; EPHA6; STAMBP; RAP1B…	4208	4205
0.0492001	0.284164	GO:0002385	b	4	mucosal immune response	4057; 4843; 64127	NOS2; LTF; NOD2	41	40
0.0495692	0.284164	GO:0048732	b	4	gland development	596; 999; 1990; 4041; 5021; 5617; 6091; 6356; 55679; 80326; 51599; 8820; 59277; 159296	CCL11; WNT10A; LRP5; ROBO1; PRL; NTN4; LIMS2; HESX1; LSR; OXTR; CDH1; NKX2-3; BCL2; CELA1	414	414
0.049971	0.284164	GO:0016125	b	4	sterol metabolic process	949; 1589; 3991; 4041; 10654; 116519; 2055	LIPE; LRP5; CYP21A2; SCARB1; PMVK; APOA5; CLN8	161	161
0.0069053	0.286615	GO:1901381	b	5	positive regulation of potassium ion transmembrane transport	481; 482; 9472; 440699	LRRC52; AKAP6; ATP1B2; ATP1B1	37	37
0.00833785	0.286615	GO:0086042	b	5	cardiac muscle cell-cardiac muscle cell adhesion	1525; 1824	CXADR; DSC2	7	7
0.00874912	0.286615	GO:0000904	b	5	cell morphogenesis involved in differentiation	596; 1942; 2043; 3706; 3800; 4756; 4825; 5293; 5295; 6091; 55679; 6498; 6711; 8399; 10461; 10509; 10675; 10678; 285220; 79834; 84062; 22854; 91584; 59277; 57643	EPHA6; EPHA4; LIMS2; SEMA4B; SPTBN1; NTNG1; B3GNT2; PIK3CD; ITPKA; ZSWIM5; NEO1; PIK3R1; PEAK1; EFNA1; SKIL; MERTK; DTNBP1; NKX6-1; PLA2G10; CSPG5; ROBO1; KIF5C; NTN4; PLXNA4; BCL2	724	724
0.0099049	0.286615	GO:0060284	b	5	regulation of cell development	482; 567; 596; 1942; 2043; 2260; 3706; 4057; 4825; 4882; 5465; 6091; 6356; 55679; 6498; 9150; 9472; 10363; 10509; 10675; 10769; 23236; 29993; 114804; 22854; 91584; 57643; 27257; 27302; 28514	PLK2; CTDP1; LIMS2; B2M; BMP10; SEMA4B; PLXNA4; NTNG1; ITPKA; ZSWIM5; FGFR1; SKIL; HMG20A; PLCB1; NPR2; EPHA4; ATP1B2; LSM1; EFNA1; DLL1; LTF; PPARA; NKX6-1; CCL11; AKAP6; CSPG5; ROBO1; PACSIN1; RNF157; BCL2	925	924
0.0109661	0.286615	GO:1903286	b	5	regulation of potassium ion import	481; 482	ATP1B2; ATP1B1	8	8
0.0109661	0.286615	GO:0072526	b	5	pyridine-containing compound catabolic process	4860; 25961	PNP; NUDT13	8	8
0.0117162	0.286615	GO:0140115	b	5	export across plasma membrane	481; 482; 8645; 222962	KCNK5; SLC29A4; ATP1B2; ATP1B1	43	43
0.0126828	0.286615	GO:0002686	b	5	negative regulation of leukocyte migration	1803; 11117; 11314; 23236	PLCB1; CD300A; DPP4; EMILIN1	44	44
0.0128178	0.286615	GO:0033688	b	5	regulation of osteoblast proliferation	596; 4041; 4057	LRP5; LTF; BCL2	24	24
0.0143466	0.286615	GO:0003298	b	5	physiological muscle hypertrophy	5465; 9150; 9472	AKAP6; CTDP1; PPARA	25	25
0.0145537	0.286615	GO:0002698	b	5	negative regulation of immune effector process	722; 966; 3821; 10039; 11314; 26007; 64127	KLRC1; C4BPA; CD59; TKFC; PARP3; NOD2; CD300A	124	124
0.0148186	0.286615	GO:0044409	b	5	entry into host	949; 999; 1380; 1525; 1803; 2838; 6504; 6510	CR2; CXADR; GPR15; SCARB1; CDH1; SLC1A5; DPP4; SLAMF1	154	154
0.0148186	0.286615	GO:0051806	b	5	entry into cell of other organism involved in symbiotic interaction	949; 999; 1380; 1525; 1803; 2838; 6504; 6510	CR2; CXADR; GPR15; SCARB1; CDH1; SLC1A5; DPP4; SLAMF1	154	154
0.0158825	0.286615	GO:0048635	b	5	negative regulation of muscle organ development	5465; 9150; 51460; 28514	SFMBT1; CTDP1; DLL1; PPARA	47	47
0.0170561	0.286615	GO:0048634	b	5	regulation of muscle organ development	596; 5465; 9150; 9472; 51460; 27302; 28514	AKAP6; DLL1; CTDP1; SFMBT1; BMP10; PPARA; BCL2	128	128
0.0171258	0.286615	GO:0002446	b	5	neutrophil mediated immunity	567; 671; 932; 966; 1088; 1508; 1675; 2215; 2990; 3903; 4057; 4860; 5908; 7130; 10694; 11314; 51646; 51316	YPEL5; CFD; CCT8; TNFAIP6; BPI; PNP; CTSB; CD59; RAP1B; FCGR3B; B2M; LAIR1; LTF; PLAC8; CEACAM8; CD300A; MS4A3; GUSB	504	502
0.0175985	0.286615	GO:0016310	b	5	phosphorylation	596; 1024; 1601; 1942; 2026; 2043; 2260; 2322; 3451; 3480; 3706; 3991; 4041; 4057; 135228; 4882; 5021; 5028; 5129; 5217; 5293; 5295; 5465; 5525; 5570; 5783; 5908; 6091; 6356; 6367; 6504; 6711; 7084; 7984; 8087; 9463; 9989; 10040; 10461; 10654; 10769; 11117; 11314; 11329; 285220; 79007; 79834; 80122; 23236; 166614; 84062; 84277; 445329; 8820; 55450; 23178; 23286; 25780; 26007; 255967; 387712; 2730…	RASGRP3; ACVR1C; HESX1; PMVK; EPHA4; NPR2; DCLK2; DBNDD1; TKFC; DAB2; FLT3; SPTBN1; PAN3; CDK18; PASK; ARHGEF5; PIK3CD; ITPKA; STK38; PIK3R1; EPHA6; ENO4; CCL22; IFNA17; PLCB1; IGF1R; PLK2; LIPE; PEAK1; SULT1A4; NOD2; DNAJC30; EFNA1; RAP1B; FXR1; ENO2; TK2; LTF; MERTK; PPARA; P2RY1; DTNBP1; FGFR1; CCL11; WWC1; EMILIN1; LRP5; PTPN13; CD109; PPP4R1; PICK1; PKIB; ROBO1; PFN2; BMP10; TOM1L1; OXTR; CD…	2393	2392
0.018273	0.286615	GO:1905207	b	5	regulation of cardiocyte differentiation	5465; 9150; 9472; 28514	DLL1; AKAP6; CTDP1; PPARA	49	49
0.0194338	0.286615	GO:0046503	b	5	glycerolipid catabolic process	949; 2166; 3991; 8399; 116519	LIPE; SCARB1; FAAH; PLA2G10; APOA5	75	75
0.0195285	0.286615	GO:0033028	b	5	myeloid cell apoptotic process	596; 5293; 64127	NOD2; PIK3CD; BCL2	28	28
0.0195285	0.286615	GO:0018146	b	5	keratan sulfate biosynthetic process	4958; 9435; 10678	CHST2; B3GNT2; OMD	28	28
0.0199846	0.286615	GO:0030593	b	5	neutrophil chemotaxis	1525; 1803; 5293; 6356; 6367; 64127	CXADR; CCL11; PIK3CD; NOD2; CCL22; DPP4	103	103
0.0214557	0.286615	GO:0061036	b	5	positive regulation of cartilage development	649; 6660; 27302	BMP10; BMP1; SOX5	29	29
0.0214746	0.286615	GO:0010648	b	5	negative regulation of cell communication	596; 1491; 1601; 1942; 2907; 2966; 3480; 4057; 135228; 5204; 5465; 5908; 6091; 6498; 6504; 7837; 8717; 9350; 9463; 10617; 10769; 11117; 11314; 11329; 80114; 114804; 114990; 84662; 55450; 23286; 26007; 27244; 27303; 28514; 130399; 51162; 64127; 64388; 169200	VASN; ACVR1C; GLIS2; PLK2; RAP1B; RBMS3; CER1; DAB2; CTH; SESN1; WWC1; TRADD; BICC1; NOD2; RNF157; GREM2; IGF1R; STAMBP; PFDN5; GTF2H2; GRINA; EFNA1; DLL1; TMEM64; LTF; PPARA; CD300A; EMILIN1; ROBO1; CD109; PICK1; TKFC; EGFL7; SLAMF1; STK38; CAMK2N1; BCL2; PXDN; SKIL	1352	1351
0.0218591	0.286615	GO:0045596	b	5	negative regulation of cell differentiation	482; 567; 596; 1493; 1942; 2043; 4041; 4057; 4825; 4882; 5295; 5465; 6356; 6498; 9150; 10363; 10401; 10509; 10769; 114990; 27257; 28514; 169200	PLK2; CTDP1; B2M; SEMA4B; PIK3R1; HMG20A; CTLA4; NPR2; EPHA4; VASN; ATP1B2; LSM1; EFNA1; DLL1; LTF; PPARA; NKX6-1; CCL11; TMEM64; LRP5; PIAS3; BCL2; SKIL	710	707
0.0234459	0.286615	GO:0071363	b	5	cellular response to growth factor stimulus	1601; 2260; 2322; 3248; 135228; 4756; 5293; 5434; 5465; 6091; 6498; 6660; 9350; 9372; 11117; 143282; 80326; 114990; 27302; 28514; 130399; 64388	ACVR1C; ZFYVE9; BMP10; CER1; DAB2; FLT3; SOX5; WNT10A; PIK3CD; HPGD; NEO1; FGFBP3; GREM2; VASN; POLR2E; DLL1; SKIL; PPARA; FGFR1; EMILIN1; ROBO1; CD109	673	673
0.0234832	0.286615	GO:0071711	b	5	basement membrane organization	7837; 22854; 59277	NTN4; NTNG1; PXDN	30	30
0.0236941	0.286615	GO:0010611	b	5	regulation of cardiac muscle hypertrophy	5465; 9150; 9472; 27302	AKAP6; CTDP1; BMP10; PPARA	53	53
0.0256109	0.286615	GO:0008045	b	5	motor neuron axon guidance	2043; 3800; 91584	KIF5C; EPHA4; PLXNA4	31	31
0.0263594	0.286615	GO:0097480	b	5	establishment of synaptic vesicle localization	3800; 5028; 5908; 10239; 10675; 341359; 84062	CSPG5; KIF5C; RAP1B; AP3S2; SYT10; DTNBP1; P2RY1	140	140
0.0269792	0.286615	GO:0051271	b	5	negative regulation of cellular component movement	482; 596; 999; 1803; 5217; 6091; 10509; 11117; 11314; 23236; 27302; 130399	PLCB1; ACVR1C; EMILIN1; ROBO1; ATP1B2; PFN2; BMP10; CDH1; SEMA4B; CD300A; DPP4; BCL2	308	308
0.0281903	0.286615	GO:0055002	b	5	striated muscle cell development	596; 1525; 4703; 5465; 9150; 9472; 27302	CXADR; AKAP6; NEB; CTDP1; BMP10; PPARA; BCL2	142	142
0.02854	0.286615	GO:0071415	b	5	cellular response to purine-containing compound	5028; 79041	TMEM38A; P2RY1	13	13
0.02854	0.286615	GO:1900115	b	5	extracellular regulation of signal transduction	9350; 64388	GREM2; CER1	13	13
0.0286868	0.286615	GO:0048699	b	5	generation of neurons	482; 567; 596; 999; 1942; 2019; 2043; 2260; 3706; 3800; 4756; 4825; 4852; 5293; 5295; 6091; 6356; 6498; 6660; 6711; 8399; 9463; 10363; 10509; 10678; 10769; 2055; 285220; 80326; 4646; 29993; 114804; 112724; 84062; 22854; 91584; 59277; 59335; 57643; 27257; 81029; 28514	EPHA6; EPHA4; MYO6; B2M; SEMA4B; PLXNA4; SPTBN1; SOX5; NTNG1; B3GNT2; ZSWIM5; WNT10A; PIK3CD; ITPKA; EN1; NEO1; PIK3R1; CDH1; FGFR1; PACSIN1; HMG20A; CLN8; PLK2; ATP1B2; LSM1; EFNA1; DLL1; SKIL; DTNBP1; PRDM12; NKX6-1; CCL11; PLA2G10; ROBO1; KIF5C; NTN4; PICK1; RNF157; NPY; RDH13; WNT5B; BCL2	1506	1506
0.0297166	0.286615	GO:0051246	b	5	regulation of protein metabolic process	596; 722; 966; 999; 1380; 1601; 1611; 1942; 2029; 2043; 2260; 2322; 3075; 3451; 3480; 4041; 4057; 135228; 4843; 5028; 5204; 5217; 5525; 5570; 5783; 5886; 5908; 6091; 6208; 6356; 6367; 6504; 7984; 8087; 8399; 8717; 9989; 10040; 10157; 10363; 10401; 10643; 10769; 11117; 11314; 11329; 2055; 373863; 79007; 23236; 285381; 84062; 84259; 51582; 91272; 54467; 55450; 55655; 22927; 55795; 23178; 23286; 566…	PLK2; ARHGEF5; ACVR1C; RAD23A; PCID2; AZIN1; EPHA4; NOS2; HABP4; IGHV3-53; DBNDD1; DESI1; ANKIB1; DAB2; FLT3; IGHV3-7; PIAS3; AASS; C4BPA; PASK; RPS14; CSTL1; TRADD; DCUN1D5; WWC1; DAP; ENSA; BOD1; CDH1; CCL22; IFNA17; HMG20A; SUCNR1; CLN8; PLCB1; IGF1R; CD59; PFDN5; NOD2; EFNA1; RAP1B; FXR1; LTF; DTNBP1; PRDM12; IGF2BP3; P2RY1; FGFR1; CR2; CCL11; DPH3; PLA2G10; EMILIN1; CFH; LRP5; PTPN13; CD109;…	2861	2857
0.029829	0.286615	GO:0015748	b	5	organophosphate ester transport	291; 949; 8399; 116519; 57194; 388323	PLA2G10; ATP10A; SCARB1; SLC25A4; APOA5; GLTPD2	113	113
0.0299707	0.286615	GO:0098773	b	5	skin epidermis development	596; 135228; 8717; 80326; 28514	WNT10A; CD109; DLL1; TRADD; BCL2	84	84
0.0300209	0.286615	GO:0070371	b	5	ERK1 and ERK2 cascade	5021; 5028; 5908; 6356; 6367; 6504; 7984; 11117; 445329; 8820; 55450; 64127	CCL11; CCL22; EMILIN1; HESX1; SULT1A4; ARHGEF5; RAP1B; NOD2; OXTR; CAMK2N1; P2RY1; SLAMF1	313	313
0.0300638	0.286615	GO:0006650	b	5	glycerophospholipid metabolic process	131118; 949; 3706; 5283; 5293; 5295; 5783; 8399; 8821; 116519; 23236; 51205; 80055	PGAP1; PLCB1; ACP6; PLA2G10; PIGH; SCARB1; PIK3CD; INPP4B; ITPKA; PTPN13; PIK3R1; APOA5; DNAJC19	349	349
0.0301661	0.286615	GO:0048536	b	5	spleen development	596; 55795; 159296	NKX2-3; PCID2; BCL2	33	33
0.0307928	0.286615	GO:0019724	b	5	B cell mediated immunity	722; 1380; 10039; 28420; 28434; 28448; 28452; 28791; 390530; 64127	CR2; IGHV1OR21-1; IGHV3-7; IGHV3-15; C4BPA; PARP3; IGHV3-53; IGHV3-33; NOD2; IGLV3-27	244	244
0.0309607	0.286615	GO:0009062	b	5	fatty acid catabolic process	1376; 2166; 3248; 5465; 5828; 27349	PEX2; FAAH; CPT2; MCAT; HPGD; PPARA	114	114
0.0312735	0.286615	GO:0007178	b	5	transmembrane receptor protein serine/threonine kinase signaling pathway	1601; 3248; 135228; 4756; 5465; 6498; 9350; 9372; 11117; 114990; 27302; 130399; 64388	GREM2; VASN; ACVR1C; EMILIN1; CD109; CER1; ZFYVE9; NEO1; SKIL; PPARA; DAB2; BMP10; HPGD	351	351
0.0315393	0.286615	GO:0090092	b	5	regulation of transmembrane receptor protein serine/threonine kinase signaling pathway	1601; 135228; 4756; 5465; 6498; 9350; 11117; 114990; 27302; 64388	GREM2; VASN; EMILIN1; CD109; PPARA; NEO1; SKIL; CER1; DAB2; BMP10	245	245
0.03192	0.286615	GO:0031175	b	5	neuron projection development	482; 567; 596; 999; 1942; 2043; 3706; 3800; 4756; 4825; 4852; 5293; 5295; 6091; 6498; 6711; 8399; 10509; 10678; 10769; 285220; 29993; 114804; 84062; 22854; 91584; 59277; 59335; 57643	EPHA6; PLK2; B2M; SEMA4B; SPTBN1; NTNG1; B3GNT2; PIK3CD; ITPKA; ZSWIM5; NEO1; PIK3R1; CDH1; PACSIN1; RNF157; EPHA4; ATP1B2; EFNA1; SKIL; DTNBP1; PRDM12; NKX6-1; PLA2G10; ROBO1; KIF5C; NTN4; PLXNA4; NPY; BCL2	976	976
0.0325929	0.286615	GO:0034368	b	5	protein-lipid complex remodeling	949; 8399; 116519	APOA5; SCARB1; PLA2G10	34	34
0.0330704	0.286615	GO:0051345	b	5	positive regulation of hydrolase activity	131118; 481; 482; 1611; 1942; 2043; 2260; 2966; 3268; 5217; 6091; 6356; 6367; 7984; 8717; 116519; 11314; 23236; 51726; 55655; 23234; 25780; 130399; 129049	RASGRP3; ACVR1C; EPHA4; APOA5; NLRP2; ARHGEF5; TRADD; DNAJB11; DAP; CCL22; DNAJC19; PLCB1; GTF2H2; ATP1B2; EFNA1; ATP1B1; SGSM1; FGFR1; CCL11; DNAJC9; ROBO1; PFN2; CD300A; AGFG2	778	777
0.0331398	0.286615	GO:0098739	b	5	import across plasma membrane	481; 482; 3772; 6510; 2055; 23428; 64116	KCNJ15; SLC7A8; ATP1B2; ATP1B1; SLC39A8; SLC1A5; CLN8	147	147
0.0335286	0.286615	GO:0051130	b	5	positive regulation of cellular component organization	482; 567; 596; 977; 1601; 2043; 2966; 3480; 3706; 4041; 5021; 5217; 5295; 5570; 5908; 6091; 6356; 55679; 6498; 7984; 9463; 10461; 10675; 10694; 116519; 11117; 23236; 29993; 114804; 57194; 57633; 91584; 59335; 27302; 28514; 64127	EPHA4; RAP1B; LIMS2; CD151; B2M; BMP10; LRRN1; APOA5; DAB2; CCT8; ARHGEF5; ITPKA; PIK3R1; ATP10A; PACSIN1; RNF157; PLCB1; IGF1R; GTF2H2; NOD2; ATP1B2; DLL1; SKIL; MERTK; CCL11; PRDM12; EMILIN1; LRP5; ROBO1; CSPG5; PICK1; PKIB; PLXNA4; PFN2; OXTR; BCL2	1270	1270
0.0337928	0.286615	GO:0051961	b	5	negative regulation of nervous system development	482; 567; 1942; 2043; 4825; 6356; 10363; 10509; 10769; 27257; 28514	CCL11; PLK2; EPHA4; ATP1B2; LSM1; EFNA1; DLL1; B2M; SEMA4B; HMG20A; NKX6-1	283	283
0.033855	0.286615	GO:0030072	b	5	peptide hormone secretion	291; 1803; 2029; 4041; 4825; 4843; 9463; 55450; 23178; 130399	NOS2; ACVR1C; LRP5; PICK1; SLC25A4; ENSA; CAMK2N1; PASK; DPP4; NKX6-1	248	248
0.0346583	0.286615	GO:0010468	b	5	regulation of gene expression	481; 596; 722; 944; 947; 966; 999; 1024; 1380; 1491; 1601; 1611; 1942; 1990; 2019; 2494; 2966; 3075; 169834; 3203; 3299; 4041; 4057; 197320; 4756; 4825; 4843; 5028; 5129; 5204; 5293; 5295; 5434; 5465; 5617; 5828; 6091; 6208; 6227; 6498; 6660; 6775; 7580; 7678; 7692; 7762; 7975; 7984; 8087; 401509; 8399; 8484; 8717; 9150; 402381; 83463; 9350; 10157; 10363; 10401; 10643; 11117; 373863; 253461; 7767…	HSF5; HSF4; CD34; GLRX2; SFMBT1; MAFK; DAB2; IGHV3-7; ZBTB38; PRL; WWC1; ARHGEF5; PIK3CD; ZNF577; CDH1; OR7D2; HMG20A; ZNF542P; ATP1B1; FXR1; NKX6-1; ZNF670; ROBO1; LRP5; IGLV3-27; GALR3; DND1; ZNF778; ZNF215; GLIS2; HABP4; DMRTB1; NKX2-3; ZNF600; HOXA6; MXD3; PASK; SOHLH1; EN1; NFE4; NR5A2; PIK3R1; PLCB1; ZNF224; NUPR2; POLR2E; ZNF827; PPARA; ZNF658B; CR2; SLC39A8; PEX2; PLA2G10; PCID2; TOX2; WN…	4696	4693
0.0352721	0.286615	GO:0097479	b	5	synaptic vesicle localization	3800; 5028; 5908; 10239; 10675; 341359; 84062	CSPG5; KIF5C; RAP1B; AP3S2; SYT10; DTNBP1; P2RY1	149	149
0.0352845	0.286615	GO:0046395	b	5	carboxylic acid catabolic process	1376; 1491; 2166; 2990; 3248; 4843; 5465; 5828; 10157; 78991; 27349	PCYOX1L; NOS2; PEX2; FAAH; MCAT; AASS; CPT2; PPARA; CTH; HPGD; GUSB	285	285
0.0353085	0.286615	GO:0019369	b	5	arachidonic acid metabolic process	1571; 2052; 2166; 8399	EPHX1; FAAH; PLA2G10; CYP2E1	60	60
0.0371255	0.286615	GO:0002790	b	5	peptide secretion	291; 947; 1803; 2029; 4041; 4825; 4843; 9463; 285381; 55450; 23086; 23178; 56670; 130399	NOS2; DPH3; ACVR1C; EXPH5; LRP5; CD34; PICK1; SLC25A4; ENSA; CAMK2N1; PASK; DPP4; SUCNR1; NKX6-1	397	397
0.0373945	0.286615	GO:0034638	b	5	phosphatidylcholine catabolic process	949; 8399	SCARB1; PLA2G10	15	15
0.0373945	0.286615	GO:0042074	b	5	cell migration involved in gastrulation	4041; 9350	CER1; LRP5	15	15
0.037742	0.286615	GO:0003176	b	5	aortic valve development	1942; 6091; 11117	ROBO1; EMILIN1; EFNA1	36	36
0.0386377	0.286615	GO:0051147	b	5	regulation of muscle cell differentiation	596; 1491; 5465; 9150; 9472; 27302; 28514	AKAP6; CTDP1; DLL1; BMP10; PPARA; CTH; BCL2	152	152
0.0386681	0.286615	GO:0106027	b	5	neuron projection organization	1942; 2043; 3480; 3706; 9463	ITPKA; IGF1R; EPHA4; PICK1; EFNA1	90	90
0.0391349	0.286615	GO:0050994	b	5	regulation of lipid catabolic process	949; 3248; 5465; 116519	APOA5; SCARB1; HPGD; PPARA	62	62
0.0396686	0.286615	GO:0001676	b	5	long-chain fatty acid metabolic process	1376; 1571; 2052; 2166; 3248; 8399	EPHX1; PLA2G10; CPT2; CYP2E1; FAAH; HPGD	122	121
0.0398047	0.286615	GO:0050777	b	5	negative regulation of immune response	722; 966; 1493; 3821; 10039; 11314; 64127	KLRC1; CTLA4; C4BPA; CD59; PARP3; NOD2; CD300A	153	153
0.0407598	0.286615	GO:0048015	b	5	phosphatidylinositol-mediated signaling	2260; 2322; 3480; 5293; 5295; 5783; 10617; 23236	PLCB1; IGF1R; PTPN13; STAMBP; PIK3CD; PIK3R1; FLT3; FGFR1	187	187
0.0411334	0.286615	GO:0048636	b	5	positive regulation of muscle organ development	596; 9472; 27302; 28514	DLL1; AKAP6; BMP10; BCL2	63	63
0.0421643	0.286615	GO:0000098	b	5	sulfur amino acid catabolic process	1491; 78991	PCYOX1L; CTH	16	16
0.0421643	0.286615	GO:1905516	b	5	positive regulation of fertilization	8399; 23236	PLCB1; PLA2G10	16	16
0.0431182	0.286615	GO:0009968	b	5	negative regulation of signal transduction	596; 1491; 1601; 1942; 2907; 2966; 3480; 4057; 135228; 5204; 5465; 6091; 6498; 6504; 7837; 8717; 9350; 10617; 11117; 11314; 11329; 80114; 114804; 114990; 84662; 55450; 23286; 26007; 27244; 27303; 28514; 51162; 64127; 64388; 169200	VASN; GLIS2; STAMBP; RBMS3; CER1; DAB2; CTH; SESN1; WWC1; TRADD; BICC1; NOD2; RNF157; GREM2; IGF1R; PFDN5; GTF2H2; GRINA; EFNA1; DLL1; LTF; PPARA; TMEM64; EMILIN1; ROBO1; CD109; TKFC; EGFL7; SLAMF1; STK38; BCL2; CAMK2N1; CD300A; PXDN; SKIL	1255	1254
0.0431888	0.286615	GO:1901863	b	5	positive regulation of muscle tissue development	596; 9472; 27302; 28514	DLL1; AKAP6; BMP10; BCL2	64	64
0.0432802	0.286615	GO:0001914	b	5	regulation of T cell mediated cytotoxicity	567; 3140; 3821	KLRC1; B2M; MR1	38	38
0.0438312	0.286615	GO:0016202	b	5	regulation of striated muscle tissue development	596; 5465; 9150; 9472; 27302; 28514	AKAP6; CTDP1; DLL1; BMP10; PPARA; BCL2	124	124
0.0438312	0.286615	GO:1990266	b	5	neutrophil migration	1525; 1803; 5293; 6356; 6367; 64127	CXADR; CCL11; PIK3CD; NOD2; CCL22; DPP4	124	124
0.0438312	0.286615	GO:1903844	b	5	regulation of cellular response to transforming growth factor beta stimulus	1601; 135228; 5465; 6498; 11117; 114990	VASN; EMILIN1; CD109; SKIL; PPARA; DAB2	124	124
0.044114	0.286615	GO:0070201	b	5	regulation of establishment of protein localization	291; 596; 947; 999; 1803; 2029; 4041; 4825; 4843; 5295; 7984; 9463; 9495; 10694; 285381; 55450; 23086; 130399	AKAP5; NOS2; DPH3; ACVR1C; EXPH5; LRP5; ARHGEF5; CD34; PICK1; SLC25A4; CCT8; ENSA; PIK3R1; CDH1; CAMK2N1; NKX6-1; DPP4; BCL2	562	561
0.0445957	0.286615	GO:0022604	b	5	regulation of cell morphogenesis	1942; 2043; 3706; 4825; 5028; 6091; 6356; 55679; 6498; 10509; 10675; 114804; 22854; 57194; 91584; 57643	CCL11; LIMS2; NTNG1; CSPG5; ROBO1; ATP10A; EPHA4; EFNA1; PLXNA4; ITPKA; ZSWIM5; SKIL; SEMA4B; P2RY1; RNF157; NKX6-1	484	484
0.048857	0.288414	GO:0051656	b	3	establishment of organelle localization	966; 3797; 3800; 5028; 5293; 5908; 91272; 10239; 10675; 11314; 4646; 84062; 84984; 284071; 55166; 55686; 341359	CD300A; CEP19; CD59; CSPG5; BOD1; KIF5C; PIK3CD; RAP1B; MEIOC; MYO6; AP3S2; SYT10; DTNBP1; MREG; P2RY1; KIF3C; CENPQ	529	529
0.0464381	0.293647	GO:0045597	b	5	positive regulation of cell differentiation	482; 596; 947; 1491; 1601; 2043; 2260; 3299; 3706; 4041; 4057; 4825; 4860; 6091; 55679; 6498; 6660; 8399; 9398; 9472; 10675; 23236; 29993; 114804; 55795; 91584; 27302; 169200	PCID2; HSF4; EPHA4; CD34; LIMS2; BMP10; DAB2; CTH; SOX5; ITPKA; FGFR1; PACSIN1; RNF157; PLCB1; ATP1B2; CD101; SKIL; NKX6-1; AKAP6; TMEM64; PLA2G10; LRP5; ROBO1; PNP; CSPG5; PLXNA4; BCL2; LTF	969	969
0.0467166	0.293647	GO:0090257	b	5	regulation of muscle system process	481; 1129; 1824; 5021; 5465; 79041; 9150; 9472; 27302	TMEM38A; AKAP6; PPARA; DSC2; CHRM2; ATP1B1; BMP10; OXTR; CTDP1	227	227
0.0486185	0.300431	GO:0090288	b	5	negative regulation of cellular response to growth factor stimulus	135228; 5465; 6498; 9350; 11117; 114990; 64388	GREM2; VASN; EMILIN1; CD109; PPARA; SKIL; CER1	160	160
0.0488463	0.300431	GO:0006464	b	5	cellular protein modification process	28; 420; 596; 1024; 1491; 1601; 1942; 2029; 2043; 2260; 2289; 2322; 2650; 3299; 3451; 3480; 3706; 3991; 4041; 4057; 135228; 168448; 4843; 4882; 5021; 5028; 5129; 5217; 5283; 5293; 5295; 5525; 5570; 5783; 5828; 5875; 5886; 5908; 6091; 6356; 6367; 6504; 6711; 7681; 7844; 7984; 8087; 8460; 9150; 9463; 9616; 9989; 10039; 10040; 10157; 10363; 10401; 10461; 10617; 10678; 10769; 116519; 11117; 11314; 11…	PGAP1; HSF4; PLK2; PPP4R1; GLRX2; FKBP5; ANKIB1; DAB2; B3GNT2; BOD1; WWC1; ARHGEF5; PIK3CD; ENSA; IFNA17; HMG20A; NPR2; STAMBP; LIPE; PASK; FXR1; FGFR1; PTPN13; PKIB; ROBO1; RNF103; RNF7; CD300A; RASGRP3; ACVR1C; HESX1; DCLK2; APOA5; NGLY1; TPST1; ITPKA; PIK3R1; CCL22; PLCB1; PARP3; SLC39A8; STAMBPL1; DCUN1D5; DTNBP1; PEX2; PRDM12; CDC14C; KLHL42; PFN2; STK38; PPP2R5A; RAD23A; EPHA6; EPHA4; RAP1B…	4208	4205
0.0496957	0.302404	GO:2000300	b	5	regulation of synaptic vesicle exocytosis	5028; 5908; 10675; 84062	P2RY1; RAP1B; DTNBP1; CSPG5	67	67
