# Supplementary material for: Associations of four biological age markers with child development: A multi-omic analysis in the European HELIX cohort
Source: eLife. 2023 Jun 6;12:e85104. doi: 10.7554/eLife.85104 (PMC10338035; doi:10.7554/eLife.85104)
Supplement: Supplementary file 7. [file elife-85104-supp7.xlsx]

## Sheet: Sheet1
Supplementary file 7: Associations between biological age measures and developmental measures, in main analysis (model 1) and sensitivity analyses (models 2-4)
	Model 1				Model 2			Model 3			Model 4
	N	SD increase / odds ratio^ per SD shortening of telomere length (95%CI)	P value		N	SD increase / odds ratio^ per SD shortening of telomere length (95%CI)	P value	N	SD increase / odds ratio^ per SD shortening of telomere length (95%CI)	P value	N	SD increase / odds ratio^ per SD shortening of telomere length (95%CI)	P value
Height z-score	1162	0 (-0.05, 0.06)	0.89		1162	0 (-0.06, 0.05)	0.86	1045	0.02 (-0.04, 0.07)	0.56	1045	0.01 (-0.05, 0.07)	0.79
BMI z-score	1162	0.12 (0.05, 0.19)	0.00082		1162	0.1 (0.03, 0.17)	0.004	1045	0.12 (0.05, 0.19)	0.00098	1045	0.11 (0.03, 0.18)	0.0035
Adiposity (BIA fat-mass %)	1153	0.07 (0.02, 0.12)	0.0093		1153	0.06 (0, 0.11)	0.034	1040	0.06 (0.01, 0.12)	0.023	1040	0.05 (0, 0.11)	0.061
Working memory (3-back d')*	882	-0.03 (-0.09, 0.03)	0.37		882	-0.03 (-0.09, 0.03)	0.3	794	-0.01 (-0.07, 0.06)	0.8	794	-0.02 (-0.08, 0.05)	0.63
Inattentiveness (ANT-HRT)	1142	-0.01 (-0.05, 0.04)	0.78		1142	-0.01 (-0.06, 0.04)	0.65	1027	-0.01 (-0.06, 0.04)	0.68	1027	-0.01 (-0.06, 0.04)	0.63
Fluid Intelligence (CPM)	1156	-0.03 (-0.07, 0.01)	0.21		1156	-0.02 (-0.06, 0.02)	0.29	1042	-0.02 (-0.07, 0.02)	0.27	1042	-0.02 (-0.06, 0.02)	0.33
Internalizing Behaviours (CBCL)	1156	0.03 (-0.03, 0.08)	0.33		1156	0.02 (-0.04, 0.07)	0.59	1039	0.02 (-0.03, 0.08)	0.44	1039	0.01 (-0.04, 0.07)	0.63
Externalizing behaviours (CBCL)	1156	0.06 (0, 0.11)	0.032		1156	0.05 (0, 0.11)	0.05	1039	0.04 (-0.02, 0.1)	0.17	1039	0.04 (-0.02, 0.09)	0.19
Lung Function (FEV1)	911	-0.01 (-0.07, 0.05)	0.75		911	0 (-0.06, 0.06)	0.96	821	0 (-0.06, 0.06)	0.94	821	0.01 (-0.06, 0.07)	0.82
Puberty onset**	537	0.92 (0.76, 1.11)	0.36		537	0.9 (0.74, 1.09)	0.28	476	0.97 (0.79, 1.2)	0.8	476	0.95 (0.77, 1.18)	0.66
	Model 1				Model 2			Model 3			Model 4
	N	SD increase / odds ratio^ per year increase in Δ DNA methylation age (95%CI)	P value		N	SD increase / odds ratio^ per year increase in Δ DNA methylation age (95%CI)	P value	N	SD increase / odds ratio^ per year increase in Δ DNA methylation age (95%CI)	P value	N	SD increase / odds ratio^ per year increase in Δ DNA methylation age (95%CI)	P value
Height z-score	1173	0.17 (0.09, 0.24)	6.2e-06		1173	0.16 (0.08, 0.24)	5.3e-05	1055	0.19 (0.12, 0.27)	3.6e-07	1055	0.18 (0.09, 0.26)	2.8e-05
BMI z-score	1173	0.18 (0.09, 0.27)	7.7e-05		1173	0.17 (0.07, 0.27)	0.00054	1055	0.19 (0.09, 0.28)	7.3e-05	1055	0.17 (0.07, 0.27)	0.00099
Adiposity (BIA fat-mass %)	1164	0.12 (0.05, 0.19)	0.00042		1164	0.11 (0.03, 0.18)	0.0042	1050	0.13 (0.06, 0.2)	0.00023	1050	0.12 (0.04, 0.19)	0.0038
Working memory (3-back d')*	890	0.05 (-0.03, 0.13)	0.19		890	0.04 (-0.05, 0.12)	0.41	802	0.08 (-0.01, 0.16)	0.073	802	0.06 (-0.03, 0.15)	0.22
Inattentiveness (ANT-HRT)	1153	0.07 (0.01, 0.13)	0.03		1153	0.08 (0.01, 0.15)	0.02	1037	0.05 (-0.01, 0.12)	0.1	1037	0.07 (0, 0.14)	0.064
Fluid Intelligence (CPM)	1167	-0.03 (-0.08, 0.02)	0.21		1167	-0.02 (-0.08, 0.04)	0.49	1052	-0.02 (-0.08, 0.03)	0.43	1052	-0.01 (-0.07, 0.05)	0.7
Internalizing Behaviours (CBCL)	1166	0.06 (-0.01, 0.13)	0.094		1166	0.02 (-0.06, 0.1)	0.6	1048	0.07 (-0.01, 0.14)	0.079	1048	0.03 (-0.05, 0.12)	0.41
Externalizing behaviours (CBCL)	1166	0.09 (0.02, 0.16)	0.01		1166	0.07 (0, 0.15)	0.062	1048	0.1 (0.03, 0.17)	0.0064	1048	0.09 (0.01, 0.17)	0.036
Lung Function (FEV1)	921	-0.07 (-0.15, 0.01)	0.085		921	-0.03 (-0.12, 0.05)	0.47	830	-0.06 (-0.15, 0.02)	0.14	830	-0.02 (-0.11, 0.08)	0.72
Puberty onset**	542	1.25 (0.99, 1.57)	0.058		542	1.27 (0.99, 1.62)	0.058	481	1.24 (0.96, 1.6)	0.099	481	1.22 (0.93, 1.6)	0.16
	Model 1				Model 2			Model 3			Model 4
	N	SD increase / odds ratio^ per year increase in Δ transcriptome age (95%CI)	P value		N	SD increase / odds ratio^ per year increase in Δ transcriptome age (95%CI)	P value	N	SD increase / odds ratio^ per year increase in Δ transcriptome age (95%CI)	P value	N	SD increase / odds ratio^ per year increase in Δ transcriptome age (95%CI)	P value
Height z-score	1007	0.66 (0.13, 1.18)	0.014		918	0.76 (0.2, 1.32)	0.0081	901	0.74 (0.2, 1.29)	0.0078	827	0.78 (0.19, 1.36)	0.0094
BMI z-score	1007	0.9 (0.27, 1.53)	0.005		918	1.01 (0.33, 1.69)	0.0035	901	1.04 (0.37, 1.7)	0.0023	827	1.13 (0.42, 1.85)	0.0019
Adiposity (BIA fat-mass %)	999	0.45 (-0.05, 0.94)	0.079		912	0.49 (-0.04, 1.03)	0.07	897	0.71 (0.19, 1.23)	0.007	824	0.78 (0.22, 1.33)	0.0059
Working memory (3-back d')*	784	0.06 (-0.51, 0.63)	0.84		704	0.04 (-0.57, 0.65)	0.9	699	0.05 (-0.54, 0.65)	0.86	631	0.1 (-0.53, 0.74)	0.75
Inattentiveness (ANT-HRT)	997	-0.39 (-0.85, 0.08)	0.11		908	-0.33 (-0.83, 0.17)	0.19	892	-0.44 (-0.93, 0.05)	0.076	818	-0.38 (-0.9, 0.14)	0.15
Fluid Intelligence (CPM)	1001	0.08 (-0.3, 0.47)	0.67		913	0.15 (-0.26, 0.57)	0.47	897	0.07 (-0.33, 0.47)	0.73	824	0.14 (-0.3, 0.58)	0.53
Internalizing Behaviours (CBCL)	1002	0.4 (-0.12, 0.93)	0.13		913	0.51 (-0.05, 1.07)	0.074	896	0.64 (0.08, 1.2)	0.026	822	0.73 (0.13, 1.32)	0.016
Externalizing behaviours (CBCL)	1002	0.45 (-0.06, 0.97)	0.083		913	0.48 (-0.07, 1.03)	0.085	896	0.56 (0.02, 1.11)	0.044	822	0.62 (0.04, 1.2)	0.036
Lung Function (FEV1)	795	0.47 (-0.06, 1.01)	0.08		719	0.59 (0.01, 1.16)	0.045	712	0.45 (-0.12, 1.02)	0.12	649	0.56 (-0.06, 1.18)	0.076
Puberty onset**	511	1.84 (0.41, 8.44)	0.42		429	2.3 (0.46, 12.09)	0.31	449	1.98 (0.38, 10.92)	0.42	378	1.74 (0.29, 10.94)	0.55
	Model 1				Model 2			Model 3			Model 4
	N	SD increase/ odds ratio^ per year increase in Δ immunometabolic age (95%CI)	P value		N	SD increase/ odds ratio^ per year increase in Δ immunometabolic age (95%CI)	P value	N	SD increase/ odds ratio^ per year increase in Δ immunometabolic age (95%CI)	P value	N	SD increase/ odds ratio^ per year increase in Δ immunometabolic age (95%CI)	P value
Height z-score	1152	0.31 (0.22, 0.4)	4.3e-11		1122	0.32 (0.23, 0.41)	1.3e-11	1031	0.23 (0.14, 0.33)	1.9e-06	1009	0.24 (0.15, 0.34)	9.6e-07
BMI z-score	1152	0.5 (0.4, 0.61)	3.8e-19		1122	0.53 (0.42, 0.64)	3.4e-20	1031	0.45 (0.33, 0.56)	2.5e-14	1009	0.46 (0.35, 0.58)	4.6e-15
Adiposity (BIA fat-mass %)	1144	0.2 (0.11, 0.28)	5e-06		1115	0.21 (0.12, 0.29)	3.1e-06	1026	0.18 (0.09, 0.27)	9.1e-05	1004	0.19 (0.09, 0.28)	6.3e-05
Working memory (3-back d')*	876	0.15 (0.05, 0.26)	0.0036		851	0.15 (0.05, 0.26)	0.0045	785	0.15 (0.04, 0.26)	0.0068	766	0.14 (0.03, 0.25)	0.013
Inattentiveness (ANT-HRT)	1135	-0.14 (-0.22, -0.06)	0.0005		1105	-0.14 (-0.22, -0.06)	0.00052	1014	-0.16 (-0.24, -0.08)	0.00015	992	-0.16 (-0.25, -0.08)	0.00018
Fluid Intelligence (CPM)	1147	0.06 (-0.01, 0.12)	0.08		1118	0.06 (-0.01, 0.13)	0.071	1027	0.04 (-0.03, 0.11)	0.3	1006	0.04 (-0.03, 0.11)	0.26
Internalizing Behaviours (CBCL)	1146	-0.09 (-0.18, 0)	0.053		1116	-0.09 (-0.18, 0)	0.048	1025	-0.1 (-0.19, 0)	0.05	1003	-0.1 (-0.19, 0)	0.048
Externalizing behaviours (CBCL)	1146	-0.01 (-0.1, 0.08)	0.82		1116	-0.02 (-0.11, 0.07)	0.73	1025	-0.01 (-0.1, 0.08)	0.81	1003	-0.02 (-0.11, 0.07)	0.68
Lung Function (FEV1)	907	0.07 (-0.03, 0.17)	0.16		882	0.07 (-0.03, 0.17)	0.17	813	0.06 (-0.05, 0.16)	0.28	794	0.06 (-0.05, 0.16)	0.27
Puberty onset**	542	1.41 (1.01, 1.97)	0.046		517	1.35 (0.96, 1.9)	0.089	476	1.28 (0.89, 1.84)	0.19	457	1.24 (0.85, 1.8)	0.26
* Not available in the Lithuanian KANC cohort
** Only assessed in children over 8 years old.
^ Odds ratio provided for puberty onset only
Model 1 adjusted for chronological age, sex, ethnicity, and study centre
Model 2 adjusted as for model 1 plus estimated cell counts
Model 3 adjusted as for model 1 plus family affluence and social capital, birthweight, maternal active smoking, and child passive smoking
Model 4 adjusted as for model 3 plus estimated cell counts
